# Supplementary material for: Superparamagnetic Clustering of Diabetes Patients Raman Spectra
Source: Hindawi journal article supplement (doi:10.1155/2019/4296153), 2019-11-05
Supplement: f1 [file 4296153.f1.txt]

  -7.7744101e-04  -4.5695578e-03  -4.2987405e-03  -4.8990027e-03  -4.6917436e-03  -4.5377356e-03  -4.5451816e-03  -3.2537872e-03  -1.8338990e-03   3.4741512e-04   3.4629461e-03   4.7593153e-03   5.3306743e-03   4.1868242e-03   3.4980254e-03   3.1183641e-03   3.6376942e-03   3.8835909e-03   5.5175360e-03   5.3368403e-03   4.0227051e-03   3.6228307e-03   2.9984759e-03   2.6845969e-03   3.8760565e-03   3.8789393e-03   3.6285023e-03   4.6354184e-03   5.1957235e-03   3.9093256e-03   4.6226408e-03   5.6955263e-03   5.7617339e-03   5.8032697e-03   6.5473728e-03   8.6891341e-03   9.5384578e-03   1.1123299e-02   1.2342998e-02   1.3197285e-02   1.2186524e-02   1.2430439e-02   1.0201571e-02   9.9421757e-03   1.0132433e-02   9.7341754e-03   8.0104104e-03   8.1081767e-03   6.7909891e-03   5.4195382e-03   4.5224930e-03   5.0422184e-03   5.0617826e-03   4.8735841e-03   5.3415150e-03   6.0154617e-03   5.7517923e-03   5.2099324e-03   3.8286611e-03   2.6203564e-03   9.7404177e-04  -1.5093306e-03  -2.5086057e-03  -1.6998411e-03  -1.0858031e-03  -4.0487246e-05   2.7060462e-03   3.5496627e-03   3.7568896e-03   3.8812806e-03   3.4341576e-03   2.8774856e-03   4.3109443e-03   5.0783550e-03   7.4523211e-03   8.9157257e-03   9.3824641e-03   9.1718546e-03   8.7285876e-03   7.2543737e-03   7.7767880e-03   8.2584411e-03   1.0158936e-02   1.2357801e-02   1.2868049e-02   1.3968558e-02   1.5978536e-02   1.6293446e-02   1.6297519e-02   1.7164764e-02   1.7592499e-02   1.6397386e-02   1.5216504e-02   1.5224487e-02   1.5191744e-02   1.4328898e-02   1.3741034e-02   1.2422387e-02   1.1437272e-02   1.0237329e-02   7.8544765e-03   5.5235780e-03   5.3603447e-03   4.7054829e-03   3.9784501e-03   3.3106757e-03   2.4505349e-03   1.0350407e-03  -4.7490211e-04  -2.9936031e-03  -4.5934154e-03  -3.8647746e-03  -4.2344943e-03  -5.8662614e-03  -6.2953457e-03  -8.0077433e-03  -1.0482288e-02  -1.0894905e-02  -1.1054356e-02  -1.0460614e-02  -8.6279829e-03  -8.3327264e-03  -1.0214798e-02  -1.1146580e-02  -1.2378879e-02  -1.3559698e-02  -1.3887323e-02  -1.3026537e-02  -1.3225738e-02  -1.4040166e-02  -1.4559375e-02  -1.5137597e-02  -1.6551072e-02  -1.5309269e-02  -1.2594155e-02  -1.1387781e-02  -9.8649654e-03  -7.5590170e-03  -7.2584756e-03  -8.0867180e-03  -6.4953283e-03  -3.6116703e-03  -1.8975025e-03  -7.1325123e-04   1.8237712e-03   2.4175859e-03   2.1366739e-03   3.4812821e-03   5.6281378e-03   6.3967308e-03   7.1630246e-03   8.6315602e-03   9.4466715e-03   9.2035556e-03   8.7978180e-03   9.9577826e-03   1.0769870e-02   1.1415922e-02   1.2694414e-02   1.5821285e-02   1.7378563e-02   1.8390819e-02   1.9285034e-02   2.1321683e-02   2.2420090e-02   2.4733795e-02   2.7363825e-02   3.0872864e-02   3.4157225e-02   3.5315739e-02   3.7689535e-02   4.0138009e-02   4.1314087e-02   4.1851860e-02   4.3422589e-02   4.2523714e-02   4.1922478e-02   4.1513651e-02   4.0127393e-02   3.9750191e-02   4.0760694e-02   3.9626257e-02   3.7752756e-02   3.6583513e-02   3.4053219e-02   2.9550975e-02   2.4854200e-02   2.0712072e-02   1.7798114e-02   1.5708344e-02   1.5790162e-02   1.6716369e-02   1.7032746e-02   1.6776960e-02   1.7185174e-02   1.5902204e-02   1.4503026e-02   1.4891490e-02   1.4489361e-02   1.2505655e-02   1.0827180e-02   9.2722333e-03   7.2067151e-03   6.9929735e-03   7.7177167e-03   8.3284972e-03   8.7164595e-03   8.2641989e-03   5.3049442e-03   2.3803708e-03   4.2866092e-04  -1.2141318e-03  -1.9001167e-03  -2.1857097e-03  -2.9341352e-03  -4.3982929e-03  -5.8323539e-03  -7.8966448e-03  -8.9267005e-03  -9.4723801e-03  -9.4279842e-03  -8.7289231e-03  -9.0088767e-03  -9.2914174e-03  -8.5089107e-03  -6.1714939e-03  -3.6039985e-03  -3.5227492e-04   2.6944392e-03   4.6274398e-03   3.6845257e-03   1.5139281e-03   1.3531892e-03   1.8006555e-03   1.6962147e-03   1.1057905e-03   2.4863599e-03   2.8233362e-03   1.7951819e-03   1.3038887e-03   2.7617831e-03   3.0346206e-03   2.0398354e-03   1.5103870e-03   1.2858232e-03   1.5643186e-03   1.3779093e-03   1.3360510e-03   1.2464513e-03   1.0569297e-03   6.0886102e-04   7.8957594e-06   1.6243065e-04   1.3156689e-03   1.9980648e-03   1.8226770e-03   1.1302492e-03   8.4552766e-04   1.0013242e-03   6.0675752e-04   6.2119609e-04   1.3216380e-03   3.2909170e-03   2.0751455e-03   2.9281085e-03   2.6764789e-03   3.3460849e-03   3.4729678e-03   4.7904265e-03   5.5783324e-03   9.6515504e-03   1.0383021e-02   1.1157721e-02   1.2785380e-02   1.3686602e-02   1.1554681e-02   1.2218768e-02   1.2126115e-02   1.1820180e-02   1.2052515e-02   1.2706691e-02   1.3164822e-02   1.2543911e-02   1.2469001e-02   1.0524734e-02   9.4695376e-03   9.7482857e-03   1.0056008e-02   8.6460346e-03   8.9068832e-03   7.1747353e-03   5.2349254e-03   3.3302097e-03   3.1845950e-03   3.1652814e-03   4.3703378e-03   3.3488993e-03   2.5128349e-03   2.4158543e-03   1.8655702e-03   5.6186164e-04   5.9520507e-04   1.8429897e-03   9.9836133e-04   4.9762606e-04   1.1098641e-03   1.2913626e-03   3.5872020e-04   6.2233396e-04   1.4158789e-03   1.2227369e-03   9.4009616e-04   1.7519071e-03   1.0130064e-03  -1.4005537e-03  -2.5876246e-03  -3.5972347e-03  -5.5152611e-03  -5.7292157e-03  -6.0514542e-03  -7.4070725e-03  -8.1508150e-03  -8.7799632e-03  -8.8341056e-03  -7.4502413e-03  -6.5158607e-03  -5.6006404e-03  -4.9117909e-03  -6.4886278e-03  -7.9397774e-03  -7.4140109e-03  -6.9775860e-03  -7.2548719e-03  -5.2757230e-03  -4.4054234e-03  -3.8879388e-03  -4.5674137e-03  -4.6149785e-03  -5.1220497e-03  -5.5168217e-03  -6.3979098e-03  -6.6221689e-03  -6.0581565e-03  -5.9828549e-03  -6.3950699e-03  -6.3122019e-03  -5.0873759e-03  -5.0253369e-03  -5.7962724e-03  -5.1355479e-03  -3.7103294e-03  -2.6894660e-03  -1.9260257e-03  -1.5190241e-04   1.9308445e-05   1.5772900e-03   3.0528039e-03   5.8684167e-03   9.9576823e-03   1.7909507e-02   2.6584897e-02   3.7154035e-02   5.0562072e-02   6.4189543e-02   7.5232532e-02   8.0171272e-02   8.1701451e-02   7.7271462e-02   6.6942761e-02   5.3947107e-02   4.2399572e-02   2.9832935e-02   1.9046758e-02   1.2167993e-02   6.6468655e-03   2.4239941e-03  -5.0288566e-04  -2.9377912e-03  -5.7831015e-03  -8.0279845e-03  -1.0062867e-02  -1.1185938e-02  -1.2361250e-02  -1.2986667e-02  -1.2499736e-02  -1.2585734e-02  -1.4322457e-02  -1.4339597e-02  -1.3289419e-02  -1.2734036e-02  -1.1129976e-02  -6.9576832e-03  -3.3235784e-03   5.3548507e-04   6.3656969e-03   1.3027201e-02   2.1102538e-02   3.0135328e-02   4.0883586e-02   5.0717182e-02   5.9400763e-02   6.4788703e-02   6.7038488e-02   6.3675465e-02   5.5732804e-02   4.6060503e-02   3.6312898e-02   2.5986318e-02   1.6832074e-02   1.1512054e-02   7.3268979e-03   4.1377621e-03   2.6606493e-03   2.4643828e-03   2.1084830e-03   2.0081019e-03   1.2377464e-03   1.6712373e-03   3.0605788e-03   3.5555549e-03   4.0353068e-03   2.9793778e-03   2.7618728e-03   3.2721965e-03   4.1088279e-03   4.6313950e-03   7.1998425e-03   7.9911803e-03   7.1357211e-03   4.6729572e-03   3.7050089e-03   2.3337672e-03   2.8868629e-03   3.7525556e-03   6.1070389e-03   6.4376701e-03   7.0957382e-03   5.2328268e-03   3.3195630e-03   2.6467834e-03   1.9190636e-03   1.2074371e-03   1.2119300e-03   7.7813104e-04   2.8903682e-04   4.8717112e-04   2.0669383e-03   2.4585553e-03   2.2531327e-03   1.4286707e-03   1.3478754e-03   3.3868608e-04   3.5105905e-04   6.6038676e-04   1.9927207e-03   1.6171034e-03   3.4135576e-04  -3.2882287e-04  -2.5464810e-04  -2.3327236e-03  -2.6284183e-03  -2.2250380e-03  -3.1585565e-03  -3.5960000e-03  -2.3853812e-03  -2.5658543e-03  -1.7236713e-03  -1.3390783e-03  -1.7497615e-03  -2.9448239e-03  -2.6480421e-03  -3.6579135e-03  -3.5351374e-03  -3.6932617e-03  -4.2552700e-03  -4.8188242e-03  -4.6268906e-03  -4.8399264e-03  -4.0390540e-03  -3.0112833e-03  -1.4564509e-03  -1.1361072e-03  -1.7827937e-03  -1.6941591e-03  -1.4593892e-03  -1.6422963e-03   3.6500711e-04   3.5449150e-03   5.0062419e-03   8.5511260e-03   1.1543767e-02   1.2422196e-02   1.4948586e-02   1.7665112e-02   1.8827780e-02   1.9824122e-02   1.9417018e-02   1.6951737e-02   1.5315354e-02   1.3893190e-02   1.1904029e-02   1.0554373e-02   1.1016966e-02   1.0776851e-02   8.4901462e-03   6.0650454e-03   5.4528404e-03   2.9962902e-03   3.6071606e-04  -1.8931036e-04   1.1923436e-03   1.6047826e-03   2.4790246e-03   4.5115322e-03   5.3653132e-03   4.7450716e-03   2.8271184e-03   3.5749083e-03   3.8833761e-03   3.1554549e-03   3.4240790e-03   5.6629279e-03   6.1516253e-03   6.4937935e-03   7.1004224e-03   6.2805918e-03   5.3919884e-03   3.3995433e-03   1.7398153e-03   3.4610798e-04  -5.5937505e-04   3.6435845e-04  -1.5940707e-04  -1.2389478e-03  -1.1157523e-03  -1.5852266e-03  -4.0130963e-03  -5.3080555e-03  -7.1461027e-03  -8.6566815e-03  -8.9022993e-03  -9.1595861e-03  -9.0606452e-03  -8.4474129e-03  -8.3191327e-03  -8.8632479e-03  -1.0022542e-02  -1.0213725e-02  -1.0603000e-02  -1.2035724e-02  -1.2154911e-02  -1.1066883e-02  -1.0608506e-02  -9.6923443e-03  -7.6927560e-03  -5.7388568e-03  -4.6227504e-03  -1.0374643e-03   1.6287011e-02   1.9265649e-02   2.0468076e-02   2.2800274e-02   2.2707109e-02   9.5830345e-03   1.1148336e-02   1.2911331e-02   1.4094977e-02   1.5858613e-02   1.6529895e-02   1.7306305e-02   1.9000909e-02   1.9711372e-02   2.0986493e-02   2.0249000e-02   1.9146776e-02   1.8184014e-02   1.7686850e-02   1.6007921e-02   1.6655000e-02   1.7990603e-02   1.9128338e-02   2.0495431e-02   2.3067308e-02   2.7025976e-02   3.0176791e-02   3.2787347e-02   3.6628517e-02   4.0368178e-02   4.3172308e-02   4.7136492e-02   5.1148832e-02   5.5263731e-02   5.8776390e-02   6.1111434e-02   6.0934779e-02   5.9716828e-02   5.6493735e-02   5.1842719e-02   4.6969667e-02   4.3196010e-02   3.8691891e-02   3.4990153e-02   3.2639136e-02   3.0704152e-02   2.7491875e-02   2.7087547e-02   2.5820210e-02   2.3303468e-02   2.0286684e-02   1.8232003e-02   1.4544201e-02   1.0794982e-02   8.3909664e-03   7.6715465e-03   6.4639205e-03   4.5994958e-03   3.6528003e-03   3.8587054e-03   1.5535689e-03   1.1061597e-03   1.1629359e-03   6.4028824e-04  -1.1201460e-03  -1.2807470e-03  -2.7854895e-03  -3.9250537e-03  -4.7531015e-03  -5.1422350e-03  -4.5052216e-03  -4.3719675e-03  -4.4312655e-03  -5.3566175e-03  -5.4663012e-03  -7.1751044e-03  -7.5294716e-03  -8.0584135e-03  -7.4506340e-03  -8.8724979e-03  -8.9315299e-03  -9.5612519e-03  -1.0033076e-02  -1.0385341e-02  -9.6202836e-03  -9.4599803e-03  -9.5523316e-03  -8.5309793e-03  -8.3505907e-03  -9.2397218e-03  -8.5373739e-03  -7.7133855e-03  -8.0847961e-03  -8.0247199e-03  -8.0579994e-03  -9.0282733e-03  -9.4430698e-03  -9.2042745e-03  -8.9454077e-03  -7.9094873e-03  -7.1682627e-03  -6.6897687e-03  -6.1224004e-03  -6.1045945e-03  -6.7823463e-03  -6.4327069e-03  -6.5152946e-03  -7.3431264e-03  -6.8927897e-03  -6.1499366e-03  -6.6039797e-03  -7.0139884e-03  -5.9176300e-03  -5.7978436e-03  -5.8065619e-03  -5.9105681e-03  -5.8989375e-03  -6.7384742e-03  -6.9259837e-03  -7.2135329e-03  -8.1193286e-03  -8.8331248e-03  -9.7253154e-03  -1.1249997e-02  -1.1417909e-02  -1.2076695e-02  -1.2396585e-02  -1.2298803e-02  -1.1443375e-02  -1.1401589e-02  -9.7369783e-03  -7.8824461e-03  -6.0642917e-03  -4.5023953e-03  -2.2992406e-03  -4.0451353e-05   1.6756442e-03   5.1245083e-03   9.9976252e-03   1.5651330e-02   2.2223557e-02   2.8476739e-02   3.2602617e-02   3.6525829e-02   4.0610784e-02   4.3121150e-02   4.6017779e-02   4.9481450e-02   5.1739326e-02   5.3376457e-02   5.4542690e-02   5.5679533e-02   5.7042643e-02   5.6999351e-02   5.5020818e-02   5.2185798e-02   4.8164723e-02   4.4685000e-02   4.0134386e-02   3.5724381e-02   3.2486331e-02   2.9744322e-02   2.4674286e-02   2.1821433e-02   1.9002817e-02   1.5641279e-02   1.2152555e-02   8.8290223e-03   5.6987636e-03   3.5212997e-03   7.8431307e-04  -1.6930559e-03  -1.6872951e-03  -1.0633602e-03   3.3928215e-05   1.7639366e-03   4.0965756e-03   9.4941064e-03   1.8841239e-02   2.3169462e-02   2.7172274e-02   3.2170213e-02   3.4731549e-02   3.2907352e-02   3.6876437e-02   4.1968582e-02   4.7056367e-02   5.1706434e-02   5.6590826e-02   6.0307391e-02   6.4326995e-02   6.6573455e-02   6.6068135e-02   6.4482574e-02   6.2520039e-02   6.0472592e-02   5.6800054e-02   5.3251098e-02   4.9890827e-02   4.5345547e-02   3.9002417e-02   3.4103561e-02   2.8474930e-02   2.2525853e-02   1.9086955e-02   1.5497521e-02   1.1204287e-02   7.6983243e-03   4.5386644e-03  -1.8377533e-04  -4.2282338e-03  -7.4261768e-03  -9.8848134e-03  -1.2475761e-02  -1.5316144e-02  -1.7853363e-02  -1.9379466e-02  -2.0910495e-02  -2.1599346e-02  -2.2986379e-02  -2.4430966e-02  -2.4414960e-02  -2.1822681e-02  -2.0242961e-02  -1.6526627e-02  -1.3427056e-02  -1.0473923e-02  -9.0988692e-03  -7.2961863e-03  -5.7113795e-03  -2.3426053e-03  -1.1732001e-03  -7.3499944e-04   1.7381316e-03   4.3746890e-03   5.0848405e-03   5.4145127e-03   5.5839755e-03   3.7108966e-03   2.0103314e-04  -8.2632967e-04  -2.4389012e-03  -3.2378236e-03  -2.4976995e-03  -1.8639598e-03  -2.8332553e-03  -1.4832940e-03  -6.4596573e-04  -4.2177897e-04  -5.6518861e-04  -6.9795742e-04  -7.0898900e-04  -6.6290846e-04  -1.5841985e-03  -1.4964404e-03  -3.3068450e-04   6.3430566e-04   7.7853061e-04   1.7050502e-03   2.4164087e-03   2.8506052e-03   3.7620490e-03   5.9148798e-03   6.8367319e-03   7.9941462e-03   1.0795758e-02   1.0702175e-02   1.0304708e-02   1.1171434e-02   1.1133708e-02   8.6926238e-03   7.5027570e-03   6.7100198e-03   6.3559634e-03   6.1718811e-03   5.7450676e-03   6.1304631e-03   5.7804811e-03   3.4122642e-03   1.1845776e-03   5.1576666e-04  -6.5162723e-04  -1.4851369e-03  -8.5755223e-04  -4.9147224e-04  -2.4502428e-04  -2.4890391e-04  -1.7479508e-03  -3.1360849e-03  -3.5632288e-03  -5.2334464e-03  -5.8020857e-03  -5.5156661e-03  -4.4314884e-03  -4.3110182e-03  -3.3031975e-03  -2.5923906e-03  -1.8023548e-03  -2.3817423e-03  -1.0635851e-03   6.8631349e-05   1.2670337e-03   3.2094715e-03   5.1326425e-03   5.5600384e-03   5.2425367e-03   5.0408077e-03   4.3098605e-03   3.5889338e-03   3.5235944e-03   3.3066285e-03   4.2520773e-03   4.6436588e-03   4.8998731e-03   6.1930784e-03   7.9736967e-03   7.9857156e-03   7.9431635e-03   9.1860202e-03   9.1724670e-03   9.7790228e-03   1.1270741e-02   1.3717983e-02   1.4854982e-02   1.5992792e-02   1.6311877e-02   1.6609637e-02   1.7017792e-02   1.7313020e-02   1.7947414e-02   1.9842564e-02   2.0964006e-02   2.0395931e-02   1.9635464e-02   1.9270048e-02   1.8487185e-02   1.7376661e-02   1.7179583e-02   1.7747176e-02   1.6905835e-02   1.5881961e-02   1.4118024e-02   1.2630744e-02   1.0475428e-02   9.9493276e-03   8.3827928e-03   7.4832321e-03   8.3097695e-03   9.0845668e-03   7.7675314e-03   7.5191086e-03   8.2194067e-03   7.0655302e-03   7.2356765e-03   8.1502939e-03   7.9816595e-03   7.3544365e-03   7.4258174e-03   7.0605680e-03   7.5928786e-03   9.2085060e-03   1.1106727e-02   1.2708377e-02   1.3499566e-02   1.3458633e-02   1.3522119e-02   1.3707923e-02   1.3428306e-02   1.3930621e-02   1.5610347e-02   1.5294414e-02   1.4020933e-02   1.4545770e-02   1.2921927e-02   1.1521764e-02   9.9832124e-03   9.4104742e-03   6.4944232e-03   4.7186073e-03   2.1281181e-03   8.9181160e-04  -2.4739996e-05  -1.2939053e-03  -8.2175796e-04  -1.7001863e-03  -2.3101661e-03  -3.1911961e-03  -3.2792742e-03  -3.8123171e-03  -3.0722318e-03  -2.9191603e-03  -3.5782178e-03  -3.1953099e-03  -3.5660391e-03  -4.7183966e-03  -5.4159820e-03  -6.0342298e-03  -7.9671199e-03  -9.8274028e-03  -1.0377574e-02  -1.0860521e-02  -1.1374617e-02  -1.1248532e-02  -1.1147309e-02  -1.1330037e-02  -1.1850151e-02  -1.3020073e-02  -1.3978703e-02  -1.4732571e-02  -1.4616802e-02  -1.4682383e-02  -1.3580676e-02  -1.3433496e-02  -1.3526224e-02  -1.3571828e-02  -1.3609779e-02  -1.3033501e-02  -1.2275774e-02  -1.0577916e-02  -9.8303096e-03  -9.0736905e-03  -9.4776953e-03  -8.1648253e-03  -8.9289648e-03  -1.0874709e-02  -1.1948365e-02  -1.1808973e-02  -1.2117844e-02  -1.1058322e-02  -8.9199443e-03  -5.9230676e-03  -2.1900615e-03   2.8472700e-03   1.0509966e-02   2.2746782e-02   4.0642206e-02   6.5264436e-02   9.7377158e-02   1.3612751e-01   1.7729313e-01   2.1518321e-01   2.4461660e-01   2.6098009e-01   2.6036505e-01   2.4283381e-01   2.1286930e-01   1.7617570e-01   1.3767467e-01   1.0260194e-01   7.4752226e-02   5.4649826e-02   4.0149565e-02   3.1160535e-02   2.4533893e-02   2.0194883e-02   1.6529451e-02   1.2711406e-02   8.6904554e-03   5.2949981e-03   2.4044397e-03  -1.5350281e-03  -6.1005111e-03  -1.0782730e-02  -1.4807606e-02  -2.0294315e-02  -2.3896669e-02  -2.6302509e-02  -2.8962456e-02  -3.0591670e-02  -3.1026468e-02  -3.1952664e-02  -3.1770019e-02  -3.0994388e-02  -3.0394859e-02  -2.9320876e-02  -2.7980321e-02  -2.6206390e-02  -2.4205641e-02  -2.2023801e-02  -1.8824422e-02  -1.4368922e-02  -9.6516738e-03  -3.9054534e-03   3.2535961e-03   1.0989490e-02   1.8652862e-02   2.5881029e-02   3.2720114e-02   3.7886505e-02   4.0422690e-02   4.0495766e-02   3.9550526e-02   3.6010736e-02   3.1696567e-02   2.6627117e-02   2.2379596e-02   1.7422189e-02   1.4070586e-02   1.1033864e-02   7.7676791e-03   5.4472059e-03   3.1656837e-03   4.9455786e-04  -1.3336956e-03  -1.5081726e-03  -2.5809707e-03  -9.4533403e-04  -6.2882892e-04   2.5358386e-05  -2.1166338e-04   1.4971240e-03   2.0681149e-03   4.0926270e-03   4.3396941e-03   5.5833524e-03   4.7161116e-03   4.5640254e-03   4.3641715e-03   5.4527694e-03   6.3161888e-03   7.3790384e-03   7.2723720e-03   7.0983684e-03   6.1950810e-03   5.3469190e-03   4.7498535e-03   3.7675805e-03   3.0360445e-03   2.8591916e-03   3.0719078e-03   2.7559882e-03   3.1368168e-03   3.8992645e-03   4.1114994e-03   4.1028603e-03   4.7716516e-03   5.3311905e-03   5.9927741e-03   7.6917341e-03   8.0313988e-03   7.4955682e-03   7.0847832e-03   6.0748425e-03   4.5000746e-03   4.6314690e-03   5.2299485e-03   4.8246188e-03   4.2023873e-03   2.5161009e-03  -1.1416009e-03  -2.6963088e-03  -4.3792720e-03  -5.7308179e-03  -4.2314438e-03  -1.7891677e-03  -2.5384807e-03  -2.3186195e-03  -4.3107458e-04  -1.4389391e-04   1.6090937e-03   3.3469449e-03   6.1942094e-03   6.9021106e-03   7.6298189e-03   6.4085552e-03   7.6528979e-03   8.3145439e-03   9.1488786e-03   9.3379787e-03   1.0318685e-02   1.0943928e-02   1.0715822e-02   1.3722410e-02   1.4243785e-02   1.6334050e-02   1.5345180e-02   1.4820791e-02   1.1173491e-02   8.2887053e-03   6.5745052e-03   6.3650949e-03   5.9628129e-03   4.4223442e-03   5.0496053e-03   3.8650222e-03   2.9344549e-03   1.0684603e-03   1.4554084e-03   3.0336317e-04  -1.2821206e-03  -3.0212942e-03  -4.2372117e-03  -5.1120123e-03  -5.1712125e-03  -4.4789395e-03  -2.9921467e-03  -1.8480103e-03  -8.3044344e-04   1.2573597e-03   2.3267600e-03   3.4464856e-03   3.9954464e-03   3.9770524e-03   3.1208891e-03   1.8165822e-03   1.1930047e-03   2.5272635e-03   4.0138299e-03   5.7374951e-03   7.8625732e-03   9.8792581e-03   9.4590125e-03   8.1739880e-03   7.1787175e-03   5.5555151e-03   2.1407306e-03   9.8629815e-04   7.6262891e-04  -5.7953420e-05  -6.2524795e-04   2.0577290e-04   6.6787896e-04  -5.0216648e-04  -1.3384567e-03  -2.0575176e-03  -3.1071779e-03  -3.8688828e-03  -3.7308523e-03  -3.9150243e-03  -3.7234635e-03  -2.5667930e-03  -1.3571552e-03   9.6444457e-04   4.8589825e-03   9.2412066e-03   1.3179521e-02   1.6025304e-02   1.8321826e-02   2.1078862e-02   2.4262435e-02   2.7713797e-02   3.2998419e-02   3.8724927e-02   4.2019436e-02   4.4337558e-02   4.6192324e-02   4.6382187e-02   4.6250048e-02   4.7007402e-02   4.6990805e-02   4.5935663e-02   4.5021599e-02   4.3454473e-02   4.0027074e-02   3.5229456e-02   3.0800810e-02   2.6382230e-02   2.0218643e-02   1.5178005e-02   1.1704193e-02   6.6688219e-03   6.2435333e-04  -4.2446636e-03  -8.9024232e-03  -1.2519389e-02  -1.4513348e-02  -1.5807141e-02  -1.6551681e-02  -1.6659047e-02  -1.7445396e-02  -1.7678528e-02  -1.6845093e-02  -1.7167192e-02  -1.7125665e-02  -1.5895981e-02  -1.5883144e-02  -1.6229802e-02  -1.4439876e-02  -1.3184821e-02  -1.1937244e-02  -8.4994264e-03  -6.7553028e-03  -6.6860241e-03  -5.4028340e-03  -4.3458978e-03  -4.1920769e-03  -1.4934943e-03   3.0866612e-03   7.0061313e-03   1.0576823e-02   1.5369735e-02   2.0257300e-02   2.4807085e-02   2.8422111e-02   3.2048242e-02   3.4732382e-02   3.5918859e-02   3.6495109e-02   3.6413156e-02   3.5588627e-02   3.4518855e-02   3.2914856e-02   2.9444714e-02   2.5599803e-02   2.1571884e-02   1.7494922e-02   1.3327102e-02   1.1025359e-02   1.0515030e-02   9.2955318e-03   6.7722107e-03   6.6218299e-03   6.9133202e-03   6.4107525e-03   5.0569188e-03   4.3029479e-03   2.8721966e-03   1.5561192e-03   2.6379759e-03   6.4725095e-03   1.0414760e-02   1.3791143e-02   1.6930558e-02   1.8522584e-02   1.9452517e-02   1.9782399e-02   2.0512394e-02   2.0454362e-02   1.9700222e-02   1.8976156e-02   1.8596522e-02   1.6176307e-02   1.4381388e-02   1.2273661e-02   1.0491072e-02   8.1115106e-03   7.0339283e-03   4.4835015e-03   2.9031813e-03   2.0246055e-03   7.2999341e-04  -7.1716357e-04   1.3914219e-05  -1.3302049e-03  -3.8952033e-03  -4.1242560e-03  -4.2511070e-03  -7.4678086e-03  -8.6048725e-03  -1.0191725e-02  -1.2693443e-02  -1.3700491e-02  -1.2501316e-02  -1.2063701e-02  -1.1126145e-02  -9.2493284e-03  -7.7609905e-03  -7.0077823e-03  -7.0253736e-03  -6.0206292e-03  -5.8433426e-03  -5.8960993e-03  -5.1399735e-03  -3.1305718e-03   3.4962440e-04   5.8213184e-03   7.1614702e-03   6.8810935e-03   6.8776231e-03   5.2085877e-03   3.3282301e-03   5.7320332e-03   1.1050784e-02   1.5702851e-02   2.0338378e-02   2.4631327e-02   2.7762552e-02   3.0359038e-02   3.4588172e-02   3.7629304e-02   3.7099492e-02   3.7898577e-02   3.7588287e-02   3.6680320e-02   3.5394581e-02   3.4357800e-02   3.1630505e-02   2.9151157e-02   2.4769548e-02   2.0459658e-02   1.6422873e-02   1.3264235e-02   9.2512001e-03   4.8150378e-03   1.5581849e-03  -5.8652183e-04  -2.8748733e-03  -5.0194930e-03  -6.8762217e-03  -9.5791634e-03  -1.1109602e-02  -1.2376436e-02  -1.2659349e-02  -1.2540762e-02  -1.2284795e-02  -1.2357872e-02  -1.2427783e-02  -1.2184972e-02  -1.1160371e-02  -9.6220202e-03  -6.9874813e-03  -2.9970067e-03  -2.0518877e-03  -1.5724614e-03  -1.6900425e-03  -7.9357267e-04  -2.0427686e-03  -1.5885999e-03   4.8704468e-04   3.3964885e-03   6.3302035e-03   1.0476295e-02   1.2376356e-02   1.2590700e-02   1.3984737e-02   1.0641300e-02   8.5235243e-03   7.6789260e-03   8.2570720e-03   6.2949614e-03   8.2487650e-03   7.7506389e-03   1.0126395e-02   1.1064443e-02   1.3479450e-02   1.4748932e-02   1.4563485e-02   1.2971217e-02   1.2834491e-02   1.3057258e-02   1.3151811e-02   1.4972720e-02   1.6859117e-02   1.6784377e-02   1.4591922e-02   1.1323930e-02   8.6810441e-03   7.3181451e-03   7.5576881e-03   1.0180506e-02   1.2803224e-02   1.4905738e-02   1.4976113e-02   1.5173747e-02   1.4313775e-02   1.3489040e-02   1.2792249e-02   1.2737964e-02   1.0400757e-02   7.6723010e-03   6.2974870e-03   7.0986195e-03   5.8628496e-03   6.7613218e-03   1.0999990e-02   1.2997244e-02   1.2208851e-02   1.2198369e-02   1.3832652e-02   1.2086556e-02   1.0374510e-02   9.7614105e-03   8.2950886e-03   6.8466268e-03   6.2918376e-03   8.1170669e-03   8.7955870e-03   1.0810659e-02   9.6939654e-03   9.4329118e-03   9.0968885e-03   1.0313918e-02   1.0996190e-02   1.2808109e-02   1.3163493e-02   1.2297070e-02   1.0927781e-02   1.0500177e-02   1.0875344e-02   1.0417295e-02   9.4470928e-03   9.7132726e-03   9.1146233e-03   8.0289613e-03   7.6404738e-03   9.6999167e-03   1.0699860e-02   9.0107982e-03   7.3251617e-03   8.0107785e-03   4.7554233e-03   4.8769036e-05  -3.5079936e-04  -2.3879343e-04  -3.0764305e-03  -4.2275542e-03  -3.6080426e-03  -3.9130383e-03  -5.5974866e-03  -6.6736213e-03  -6.3442207e-03  -7.5980899e-03  -8.1683901e-03  -9.0056318e-03  -9.6832987e-03  -1.0832681e-02  -1.1263164e-02  -1.0927513e-02  -9.9615184e-03  -1.0369850e-02  -1.0081563e-02  -8.8205533e-03  -9.7644376e-03  -1.0290059e-02  -8.4011074e-03  -7.5934643e-03  -7.5531466e-03  -6.0373810e-03  -3.6123879e-03  -2.6047797e-03  -2.2683002e-03  -2.1770274e-03  -9.0366156e-04  -1.2839241e-03  -1.4341737e-03  -6.3467336e-04   1.7310545e-03   6.8204638e-04   8.6058259e-05   3.1337559e-04   2.7624887e-03   4.4905989e-03   6.2795700e-03   7.7221596e-03   8.4648712e-03   7.4383320e-03   6.8612531e-03   6.8849050e-03   6.3543550e-03   6.8521970e-03   6.6253094e-03   4.0140805e-03   3.3728807e-03   3.5833197e-03   1.5790075e-03   1.3549086e-03   4.9274364e-03   7.9554949e-03   8.3406462e-03   9.6921448e-03   8.0839315e-03   6.7071494e-03   5.5373547e-03   5.8130475e-03   9.1864747e-03   1.2918346e-02   1.3144709e-02   1.4753585e-02   1.7543710e-02   1.7269110e-02   1.9662529e-02   2.1600616e-02   2.1210785e-02   2.0309924e-02   1.9274600e-02   1.7323305e-02   1.7275592e-02   1.6284612e-02   1.5174276e-02   1.3456830e-02   1.0869500e-02   8.9049962e-03   9.6569389e-03   1.0142137e-02   1.3350549e-02   1.5055977e-02   1.6533402e-02   1.6196348e-02   1.5247066e-02   1.1728443e-02   1.0779953e-02   8.7540259e-03   1.0231149e-02   1.3763572e-02   1.7791470e-02   2.0313753e-02   2.4037106e-02   2.6584369e-02   2.9948856e-02   3.4263266e-02   3.8804184e-02   3.9412445e-02   3.7624058e-02   3.4838279e-02   3.1471068e-02   2.8379264e-02   2.7470650e-02   2.6589410e-02   2.4816102e-02   2.0947068e-02   1.7980185e-02   1.7168544e-02   1.8987345e-02   1.6724927e-02   1.7006904e-02   1.4513666e-02   1.0278161e-02   3.3143004e-03   2.8741156e-03   2.4438003e-03   2.8256780e-03   3.6112276e-03   5.6653593e-03   6.5038114e-03   5.7791113e-03   4.9402099e-03   3.5121078e-03   2.4112179e-03   6.6208106e-04  -8.0572170e-04  -1.9736578e-03  -1.7779184e-03  -2.4971604e-03  -3.1064315e-03  -2.9338877e-03  -1.6729149e-03  -2.5004098e-03  -3.7017833e-03  -4.9965234e-03  -6.2758865e-03  -6.9443571e-03  -6.4187306e-03  -4.5108646e-03  -3.3487614e-03  -3.3050405e-03  -2.1106996e-03  -1.8272504e-03  -3.2600601e-03  -3.2849388e-03  -3.6488385e-03  -5.2566147e-03  -6.9296552e-03  -4.8836736e-03  -4.3770136e-03  -2.8949233e-03  -3.2615193e-03  -1.7749427e-03  -4.1755067e-03  -4.8536051e-03  -5.7185027e-03  -4.8061036e-03  -4.5011733e-03  -3.5884001e-03  -4.2234065e-03  -4.8857402e-03  -5.6717333e-03  -5.8618446e-03  -5.7856547e-03  -6.1881579e-03  -6.2388579e-03  -6.4229322e-03  -7.5633015e-03  -8.6027806e-03  -8.0327133e-03  -5.1829208e-03  -3.8575519e-03  -2.4977533e-03  -1.0961678e-03  -2.4548424e-04  -9.1314550e-04  -5.0533114e-04  -4.2046722e-04   2.7617104e-04   8.7439952e-04   6.9462765e-04   8.4254031e-04   8.3470699e-04   6.4839686e-04   9.3553352e-04   1.8361342e-03   3.4602097e-03   4.0520439e-03   4.5821800e-03   5.0196683e-03   4.3752948e-03   3.0993976e-03   3.2513384e-03   3.8949451e-03   4.5678904e-03   5.6739881e-03   6.6574381e-03   7.6400736e-03   7.6407919e-03   7.3605798e-03   7.7258069e-03   7.8072048e-03   7.1235730e-03   6.9835873e-03   6.8609663e-03   7.4993107e-03   7.2118688e-03   8.2133314e-03   8.5622228e-03   8.2514954e-03   6.8821985e-03   5.9403048e-03   4.0192223e-03   2.2298195e-03   1.3071364e-03  -1.3052462e-04  -6.0746416e-04  -5.4791131e-04  -4.1045334e-04  -1.5533208e-03  -2.3263592e-03  -3.6851139e-03  -4.2894400e-03  -4.7205108e-03  -4.1852501e-03  -3.1480321e-03  -2.9995177e-03  -4.4283071e-03  -5.8884760e-03  -7.0686996e-03  -8.8692468e-03  -9.3224669e-03  -9.4314439e-03  -9.8715685e-03  -1.1166357e-02  -1.2056068e-02  -1.3116003e-02  -1.4130052e-02  -1.4919468e-02  -1.5197872e-02  -1.5889315e-02  -1.6506185e-02  -1.6611637e-02  -1.7108215e-02  -1.6964723e-02  -1.6438272e-02  -1.5433954e-02  -1.4975735e-02  -1.4115507e-02  -1.2924194e-02  -1.0720999e-02  -8.1675578e-03  -4.3450918e-03   3.3158679e-04   4.7041695e-03   9.4525723e-03   1.3375632e-02   1.7579552e-02   2.1678107e-02   2.6424234e-02   3.0679464e-02   3.5728249e-02   3.9556324e-02   4.2825645e-02   4.4864757e-02   4.5713438e-02   4.7793016e-02   5.2910524e-02   5.5702202e-02   5.8189316e-02   6.1216271e-02   6.2105666e-02   6.1494925e-02   6.3525502e-02   6.6318814e-02   6.9272830e-02   7.2423357e-02   7.4038618e-02   7.5981313e-02   7.7583419e-02   7.7953177e-02   7.7794758e-02   7.6555187e-02   7.4323056e-02   7.0964937e-02   6.7781684e-02   6.4294491e-02   6.0975078e-02   5.8132397e-02   5.5133019e-02   5.2113798e-02   4.9288201e-02   4.7310117e-02   4.5314406e-02   4.4997009e-02   4.4781834e-02   4.4947871e-02   4.6250597e-02   4.7507745e-02   4.7502238e-02   4.7539762e-02   4.8656020e-02   5.0046042e-02   4.9262174e-02   4.7587362e-02   4.5242376e-02   4.1737108e-02   3.6257300e-02   3.4425612e-02   3.3010402e-02   3.0186399e-02   2.7415160e-02   2.4378058e-02   1.8913827e-02   1.4004163e-02   1.0845337e-02   7.6990375e-03   4.7803625e-03   2.1277928e-03  -2.1586853e-04  -2.2814449e-03  -4.7074056e-03  -6.5010281e-03  -8.1401990e-03  -9.6835336e-03  -1.1151224e-02  -1.2712548e-02  -1.4254338e-02  -1.5617368e-02  -1.7096835e-02  -1.7838840e-02  -1.7957305e-02  -1.8379091e-02  -1.8470753e-02  -1.8146088e-02  -1.7964895e-02  -1.7905221e-02  -1.7532614e-02  -1.7124097e-02  -1.6709682e-02  -1.6758186e-02  -1.6685362e-02  -1.6582636e-02  -1.6205452e-02  -1.5853614e-02  -1.5227003e-02  -1.4351758e-02  -1.3036132e-02  -1.1811045e-02  -1.0858782e-02  -9.9706308e-03  -9.2250122e-03  -8.7924796e-03  -8.5711677e-03  -7.6805981e-03  -6.7529261e-03  -5.9079282e-03  -5.0075896e-03  -4.2955590e-03  -3.5179991e-03  -2.3216917e-03  -1.3784501e-03  -1.0426576e-03  -3.1923896e-04   5.7420887e-05  -2.2295513e-04  -1.1256722e-05   4.7591542e-04   7.0255574e-04   7.9743573e-04   1.0764602e-03   1.4319954e-03   2.0157624e-03   2.5907982e-03   3.1356291e-03   3.8669801e-03   3.9765446e-03   4.1346431e-03   4.3201661e-03   4.8915206e-03   5.5199872e-03   6.4008134e-03   7.1530557e-03   7.8981431e-03   8.3672575e-03   8.4593214e-03   8.9350306e-03   9.2683738e-03   9.1380060e-03   9.2415167e-03   9.5942782e-03   1.0022783e-02   1.0770306e-02   1.1708300e-02   1.2215353e-02   1.2882963e-02   1.2984348e-02   1.2576386e-02   1.2405419e-02   1.1903879e-02   1.1219572e-02   1.0821046e-02   1.0093578e-02   9.4412679e-03   9.8327716e-03   9.6323211e-03   9.2454629e-03   9.7420228e-03   1.0189763e-02   9.8555858e-03   9.7577894e-03   9.5868938e-03   9.4031878e-03   8.4977496e-03   7.3864167e-03   6.9516198e-03   6.5714667e-03   5.7902962e-03   5.7692862e-03   5.9741319e-03   5.1139976e-03   3.9633963e-03   2.9363263e-03   1.9602420e-03   1.1824436e-03   5.4567841e-04   6.0265456e-04   9.7658849e-04   9.6323341e-04   9.1700925e-04   1.6559712e-03   1.9434667e-03   1.8709311e-03   1.9694589e-03   2.2656637e-03   2.6851088e-03   2.9295475e-03   2.9913780e-03   3.3703505e-03   4.0238738e-03   4.3560298e-03   4.7356517e-03   5.2949860e-03   5.5787749e-03   5.8222615e-03   6.3733901e-03   7.0037452e-03   7.8352483e-03   8.6923621e-03   9.4103560e-03   9.4196754e-03   9.7090061e-03   9.7492190e-03   9.5124239e-03   9.4741895e-03   9.4152356e-03   9.0850776e-03   8.5824148e-03   7.9904096e-03   6.7992609e-03   6.1384989e-03   5.1685288e-03   4.3213734e-03   4.1667498e-03   3.2168658e-03   2.0296609e-03   1.7361915e-03   1.2949093e-03   3.0271271e-04   4.0254188e-04  -6.7685207e-05  -8.5729136e-04  -1.1073392e-03  -7.9241594e-04  -1.3469707e-03  -1.3429390e-03  -1.4636889e-03  -1.7323739e-03  -2.6844043e-03  -2.8824137e-03  -2.9995679e-03  -3.0509729e-03  -3.5395418e-03  -3.0982899e-03  -3.3974231e-03  -3.2453719e-03  -3.2749034e-03  -3.1810622e-03  -3.4553167e-03  -2.9883157e-03  -2.8973813e-03  -2.3224751e-03  -1.0622674e-03   4.1807137e-04   8.9811090e-04   1.6476596e-03   3.3544364e-03   5.2107823e-03   5.0504228e-03   5.4058580e-03   5.3601914e-03   4.2830167e-03   3.1734066e-03   4.0624885e-03   5.1185063e-03   6.4699821e-03   7.6063233e-03   7.5937314e-03   7.2662211e-03   6.6319778e-03   5.3198638e-03   3.6032029e-03   1.6760961e-03   1.1641815e-05  -1.4891921e-03  -3.1238333e-03  -3.8152442e-03  -4.2035792e-03  -4.4561705e-03  -4.4825587e-03  -3.6056718e-03  -3.3585245e-03  -2.8148791e-03  -2.3648081e-03  -1.8950927e-03  -1.2062519e-03  -2.5688389e-04   7.0112233e-04   1.4509499e-03   2.5763291e-03   3.5813040e-03   4.5473279e-03   6.2002279e-03   8.3907939e-03   1.0792432e-02   1.3576133e-02   1.6487704e-02   1.9130212e-02   2.1214285e-02   2.2635856e-02   2.2866122e-02   2.2573243e-02   2.1250658e-02   1.8938587e-02   1.6726916e-02   1.4648796e-02   1.2312701e-02   1.0813772e-02   9.9073575e-03   9.3274416e-03   9.1137729e-03   9.4289353e-03   9.6956674e-03   1.0566763e-02   1.1306375e-02   1.1254031e-02   1.1390464e-02   1.1495568e-02   1.0996035e-02   9.6179232e-03   9.2640482e-03   8.6878606e-03   7.5630884e-03   6.1913054e-03   5.1654160e-03   3.7034829e-03   2.0776311e-03   8.3805188e-04  -9.6164404e-04  -2.3905985e-03  -4.0429932e-03  -5.4682957e-03  -7.0601411e-03  -7.6864977e-03  -8.0727089e-03  -9.0215283e-03  -9.6616097e-03  -1.0468383e-02  -1.1151182e-02  -1.1462148e-02  -1.1681243e-02  -1.2350129e-02  -1.2103887e-02  -1.1666533e-02  -1.1863999e-02  -1.0987560e-02  -1.0413075e-02  -1.0500377e-02  -9.8863376e-03  -9.1835980e-03  -9.0374766e-03  -8.1621345e-03  -7.5709545e-03  -7.5901704e-03  -7.0456682e-03  -6.5278019e-03  -5.7874534e-03  -4.2764685e-03  -3.5691033e-03  -2.7282130e-03  -1.0618996e-03   7.5220434e-05   1.2990238e-03   3.6235879e-03   4.9710538e-03   6.3477484e-03   7.6571740e-03   8.8972681e-03   9.8915504e-03   1.1790157e-02   1.3196204e-02   1.4678989e-02   1.6505812e-02   1.8801211e-02   2.0831699e-02   2.3666418e-02   2.6580688e-02   2.9475805e-02   3.1539269e-02   3.3643174e-02   3.5006598e-02   3.5514420e-02   3.6292873e-02   3.7007207e-02   3.6958130e-02   3.6500083e-02   3.6815974e-02   3.5921056e-02   3.4943815e-02   3.4806822e-02   3.4442589e-02   3.3951532e-02   3.2968762e-02   3.1806037e-02   3.0279672e-02   2.9640652e-02   2.8511867e-02   2.8057829e-02   2.7301788e-02   2.6166378e-02   2.5423908e-02   2.4843384e-02   2.3810027e-02   2.3388352e-02   2.3098346e-02   2.1975206e-02   2.0904141e-02   2.0561780e-02   2.0169703e-02   1.9835042e-02   1.9318752e-02   1.8668103e-02   1.7750808e-02   1.6801014e-02   1.5699881e-02   1.4514738e-02   1.4151791e-02   1.3278354e-02   1.2526268e-02   1.1204297e-02   1.0592363e-02   9.0566824e-03   8.3341840e-03   7.4966366e-03   7.0889417e-03   5.3691878e-03   4.6478018e-03   3.7455189e-03   3.4409156e-03   2.8080149e-03   2.9161170e-03   2.8431391e-03   2.5462375e-03   1.4894011e-03   1.1244219e-03   5.3033087e-04  -1.9631352e-04  -5.1561840e-04  -6.0553858e-04  -1.0415577e-03  -1.1084768e-03  -1.2446693e-03  -2.0112857e-03  -2.2011592e-03  -2.8284169e-03  -3.1206699e-03  -4.0105524e-03  -3.8000093e-03  -4.3607646e-03  -4.3400981e-03  -4.2798504e-03  -4.1510787e-03  -5.0285181e-03  -5.5297452e-03  -5.9948574e-03  -6.7285322e-03  -7.1287332e-03  -7.1887257e-03  -7.2352066e-03  -6.9109630e-03  -7.3277111e-03  -7.0050552e-03  -6.4652270e-03  -6.2244240e-03  -6.3348391e-03  -6.0889714e-03  -5.9358058e-03  -6.2618594e-03  -6.3255597e-03  -6.3069083e-03  -5.8042518e-03  -5.6857893e-03  -5.0907633e-03  -4.6764838e-03  -4.0906256e-03  -3.7752449e-03  -3.4013724e-03  -3.6413655e-03  -3.3811708e-03  -2.9161417e-03  -2.7491019e-03  -2.6658845e-03  -2.0084408e-03  -1.7193530e-03  -1.7610574e-03  -1.4938336e-03  -1.0238061e-03  -7.3333274e-04  -1.8547355e-04   3.2112763e-04   7.6326615e-04   1.0417918e-03   9.8359635e-04   1.1367408e-03   1.3183167e-03   1.4645087e-03   1.6850048e-03   2.1610715e-03   1.9599373e-03   1.9870352e-03   2.1489881e-03   2.2166201e-03   2.5715105e-03   2.9384249e-03   3.0141700e-03   3.0711327e-03   3.2612085e-03   3.4431870e-03   3.2376404e-03   3.2022905e-03   3.5699804e-03   3.1702103e-03   2.7221772e-03   3.0911018e-03   3.6007204e-03   3.2535139e-03   3.3363458e-03   3.7071849e-03   3.6902739e-03   3.3271734e-03   3.3954445e-03   3.6711368e-03   3.7194625e-03   3.3677156e-03   3.6113378e-03   3.7115029e-03   3.6179662e-03   3.2492426e-03   3.5525225e-03   3.4178538e-03   3.1867684e-03   3.1702669e-03   3.3245202e-03   3.0411724e-03   2.7520612e-03   2.7308898e-03   2.8945900e-03   2.9196296e-03   3.2745826e-03   3.0660613e-03   2.9748612e-03   2.5106953e-03   2.1624288e-03   1.6398327e-03   1.9706303e-03   2.0681959e-03   2.3654097e-03   2.3731188e-03   2.4806276e-03   2.1867906e-03   2.1546445e-03   1.8221270e-03   1.7800440e-03   1.7700113e-03   1.4131694e-03   9.4444419e-04   8.3081642e-04   5.8323025e-04   2.2456138e-04   9.2982852e-04   8.0877698e-04   7.5513878e-04   8.4928693e-04   1.0774364e-03   6.6215666e-04   1.2112497e-03   1.4418622e-03   1.3199088e-03   1.4493532e-03   1.3129423e-03   1.2224185e-03   1.1440836e-03   1.3566471e-03   1.0232092e-03   1.1501564e-03   1.0311768e-03   8.2012649e-04   7.3026240e-04   1.0070847e-03   1.2955077e-03   1.4011018e-03   2.0109271e-03   1.8425712e-03   1.9395434e-03   1.7192802e-03   1.7997759e-03   1.2351147e-03   1.4766140e-03   1.4607612e-03   1.4306349e-03   1.5393907e-03   1.9241768e-03   1.8667582e-03   1.6794073e-03   1.8595773e-03   1.9778643e-03   1.6507759e-03   2.1525019e-03   2.2008454e-03   2.1088659e-03   1.5960244e-03   1.7945802e-03   1.3501719e-03   1.3357708e-03   1.4499280e-03   1.5043092e-03   1.6046553e-03   1.6485656e-03   1.8110754e-03   1.5755315e-03   1.9573163e-03   1.8269120e-03   1.3972189e-03   9.6674274e-04   5.8576993e-04  -1.8329915e-05  -2.1158164e-04  -1.0393721e-04  -5.6907842e-04  -5.0050136e-04  -2.6224875e-04  -4.8047472e-04  -7.0644850e-04  -3.3543193e-04  -6.7033156e-04  -6.0350115e-04  -6.0478400e-04  -4.4140468e-04  -2.9924758e-04
  -9.2942433e-03  -7.6016591e-03  -7.5756470e-03  -6.8064394e-03  -4.3602620e-03  -2.4313467e-03  -8.4104431e-04   2.0036354e-03   4.3261965e-03   4.5104437e-03   4.3603092e-03   4.9292899e-03   4.0914696e-03   2.3671926e-03   1.6854038e-03   1.7773082e-03   1.9981308e-03   4.1110158e-03   5.5118765e-03   4.5871014e-03   5.5992479e-03   7.3237759e-03   7.8067329e-03   7.7735590e-03   8.4205263e-03   7.7601960e-03   5.6443996e-03   4.5330567e-03   7.2859070e-03   9.9682391e-03   1.1118198e-02   1.2654969e-02   1.4103718e-02   1.4553257e-02   1.3718731e-02   1.3869254e-02   1.2715796e-02   1.1529863e-02   1.0353514e-02   1.2385653e-02   1.3012310e-02   1.2220069e-02   1.2073026e-02   1.1927654e-02   9.9341235e-03   8.8553904e-03   1.0920454e-02   1.1312868e-02   9.1833238e-03   7.9044873e-03   7.6408266e-03   6.5465662e-03   5.6674602e-03   4.8683871e-03   5.0017616e-03   4.1957606e-03   2.2529115e-03   7.8110985e-04   1.6459723e-03   5.9066913e-04  -1.6622312e-03  -2.4630212e-03  -2.9073137e-03  -3.9511633e-03  -3.5838238e-03  -1.8790788e-03   1.3193890e-04  -1.2346362e-04   3.3707402e-04   1.1679106e-03   1.1179532e-03   9.3963066e-05   1.7376885e-03   3.8707808e-03   4.1052995e-03   5.6207216e-03   8.6954971e-03   1.0609786e-02   1.0537279e-02   1.1181475e-02   1.1432418e-02   1.1852570e-02   1.1789360e-02   1.3552629e-02   1.3236690e-02   1.3601233e-02   1.3056601e-02   1.3697990e-02   1.3264148e-02   1.5164790e-02   1.6050426e-02   1.6703314e-02   1.8003504e-02   1.7740808e-02   1.7578093e-02   1.7019936e-02   1.6318473e-02   1.4462580e-02   1.3006472e-02   1.2451127e-02   1.0353418e-02   9.4160399e-03   8.7450528e-03   8.0947775e-03   6.4325817e-03   6.9095499e-03   6.2244256e-03   5.2114694e-03   4.6818782e-03   3.5340581e-03   1.5669778e-03  -6.7496105e-04  -2.6367271e-03  -4.4357885e-03  -6.0937363e-03  -7.6377898e-03  -8.7374300e-03  -8.9815270e-03  -1.0105383e-02  -1.0796643e-02  -1.1796146e-02  -1.3120971e-02  -1.5286457e-02  -1.6375486e-02  -1.5948354e-02  -1.6152689e-02  -1.4533228e-02  -1.3771147e-02  -1.3464068e-02  -1.4037961e-02  -1.3705948e-02  -1.5674307e-02  -1.5766442e-02  -1.5304112e-02  -1.5396373e-02  -1.5417245e-02  -1.3656560e-02  -1.3190982e-02  -1.2675435e-02  -1.0925811e-02  -8.5847416e-03  -8.0553357e-03  -4.6654030e-03  -3.1554804e-03  -4.3606384e-04   2.5702124e-03   5.9787940e-03   6.5113019e-03   8.3024701e-03   7.1465450e-03   6.5401147e-03   5.1334336e-03   4.6697245e-03   4.8559573e-03   7.1545547e-03   8.4366013e-03   1.1031078e-02   1.3312886e-02   1.3881757e-02   1.3879442e-02   1.7038741e-02   1.8255258e-02   2.0082004e-02   2.4189911e-02   2.7926730e-02   2.9071354e-02   3.2701349e-02   3.5806707e-02   3.8247894e-02   3.8950658e-02   4.1492579e-02   4.3994157e-02   4.6375164e-02   4.7996228e-02   5.0375208e-02   5.1419046e-02   5.2913263e-02   5.2842788e-02   5.3211114e-02   5.4374944e-02   5.2212757e-02   4.8638941e-02   4.5548816e-02   4.1803473e-02   3.8031308e-02   3.5542616e-02   3.2102390e-02   2.9294750e-02   2.6651929e-02   2.3600583e-02   2.1280008e-02   1.9295809e-02   1.6936467e-02   1.6105562e-02   1.5614686e-02   1.4456421e-02   1.4068050e-02   1.3538672e-02   1.1994456e-02   1.1440116e-02   1.1284930e-02   1.0771129e-02   1.1184803e-02   1.0364857e-02   1.0289867e-02   9.4031617e-03   7.6937252e-03   6.9159906e-03   7.3935161e-03   5.0988841e-03   3.5740822e-03   3.0418613e-03   5.8679973e-04  -2.1615661e-03  -3.0177563e-03  -4.5053652e-03  -5.2375347e-03  -6.0478799e-03  -6.7588391e-03  -8.3898611e-03  -8.8129650e-03  -9.5234485e-03  -9.5918082e-03  -1.0476149e-02  -1.0065189e-02  -9.9197203e-03  -9.0153210e-03  -7.4230583e-03  -4.6983979e-03  -3.1236279e-03  -8.3370613e-04   1.9328485e-04   2.0906786e-03   3.1832259e-03   3.7496869e-03   4.9902365e-03   5.6615077e-03   4.4835830e-03   5.4095289e-03   7.3399946e-03   7.3836787e-03   9.0780436e-03   9.1643832e-03   8.3783044e-03   6.7299887e-03   5.1806157e-03   2.4597870e-03   2.4306823e-03   2.4701140e-03   1.6818413e-03   1.3855078e-03   1.2897605e-03   8.5616552e-04  -1.0145490e-03  -8.9110861e-04  -9.2784976e-04  -6.5558521e-04  -8.6180818e-04  -7.5110998e-05   8.7357961e-04   1.8508326e-03   1.8937742e-03   2.6494914e-03   3.6083753e-03   2.5423193e-03   1.3989057e-03   2.1366502e-03   3.3270331e-03   4.3018766e-03   5.6947541e-03   7.7500738e-03   7.6026820e-03   7.6346647e-03   7.5502453e-03   8.3316224e-03   8.8467231e-03   1.0333857e-02   1.0523122e-02   1.1016258e-02   1.0879723e-02   1.0039298e-02   1.0743344e-02   1.1143413e-02   9.8431620e-03   9.8935235e-03   1.1520800e-02   1.1272973e-02   1.0417163e-02   1.0765437e-02   9.6202964e-03   6.9843910e-03   5.9788720e-03   5.1375316e-03   2.9076260e-03   1.3397379e-03   1.0343443e-03  -5.1760051e-04  -1.3941996e-03  -3.4385024e-04  -6.2093105e-04  -6.9956845e-04  -4.6406253e-04  -3.0117349e-04  -3.4810946e-04   6.6089575e-04   7.2513220e-04   3.3985732e-04  -6.1486635e-04  -1.7564929e-03  -1.8278334e-03  -2.5009661e-03  -2.8851257e-03  -1.9421495e-03  -1.6125580e-03  -9.5895590e-04  -3.7445164e-04  -2.7677919e-04  -1.1459316e-03  -2.7112037e-03  -6.2220908e-03  -8.2003800e-03  -8.9486519e-03  -1.0650446e-02  -9.2930907e-03  -6.7550408e-03  -5.7802160e-03  -6.2338051e-03  -5.3363839e-03  -5.6496725e-03  -6.6969560e-03  -7.7227554e-03  -8.1449530e-03  -7.9058058e-03  -7.3938904e-03  -6.9158554e-03  -5.7909919e-03  -4.2089150e-03  -3.3873422e-03  -3.6313897e-03  -4.3110179e-03  -5.7494833e-03  -6.5192060e-03  -5.8606624e-03  -5.0991650e-03  -4.3805484e-03  -2.9341017e-03  -2.5862366e-03  -4.6838625e-03  -6.6753187e-03  -6.5639414e-03  -5.5088068e-03  -5.4868912e-03  -4.2911204e-03  -2.7545481e-03  -1.3647245e-03   4.2248950e-04   3.5758986e-03   7.3793581e-03   1.2925283e-02   1.9622109e-02   2.8113925e-02   3.9575199e-02   5.2126001e-02   6.6060111e-02   7.7395800e-02   8.6235001e-02   8.9810458e-02   8.8213131e-02   8.0296444e-02   6.8530657e-02   5.2875051e-02   3.8484781e-02   2.6885550e-02   1.5480977e-02   6.8071483e-03   1.3943368e-03  -3.6991409e-03  -6.9119264e-03  -7.7074065e-03  -8.2464732e-03  -9.4056032e-03  -1.0559002e-02  -1.3010259e-02  -1.4843410e-02  -1.6130109e-02  -1.5728781e-02  -1.4669321e-02  -1.4337867e-02  -1.4364051e-02  -1.2410394e-02  -1.0616402e-02  -8.5949716e-03  -5.2962957e-03  -3.7608322e-04   5.8205979e-03   1.2357618e-02   2.2053780e-02   3.3560397e-02   4.6897851e-02   5.8540471e-02   6.9124520e-02   7.6290033e-02   7.9595617e-02   7.5761702e-02   6.7084808e-02   5.7113199e-02   4.5704678e-02   3.3218925e-02   2.3046943e-02   1.8412440e-02   1.3306676e-02   9.5826387e-03   7.9274018e-03   6.4791887e-03   3.1519450e-03   1.3519566e-03  -1.4879098e-03  -1.8845366e-03  -2.5775174e-03  -2.7998449e-03  -9.6323705e-04   2.4006450e-04  -1.7498007e-03  -1.3853048e-03   7.4960498e-04   5.1570260e-04   1.4562404e-03   5.4116350e-03   8.1107079e-03   6.7467245e-03   6.2071161e-03   6.6731845e-03   7.3558879e-03   7.1314706e-03   9.2961057e-03   1.0617992e-02   1.1137858e-02   9.7917595e-03   9.6760289e-03   8.8898611e-03   9.0915728e-03   9.5979580e-03   7.5474172e-03   6.9406584e-03   5.3141846e-03   4.0503518e-03   2.9958956e-03   4.7628113e-03   4.5079512e-03   4.4258443e-03   3.8235736e-03   3.0385329e-03   7.7560316e-04   7.5236843e-04   1.7717294e-03   1.9174924e-03   1.1712691e-03   1.7576096e-03   1.1592596e-03  -9.2790140e-04  -2.3152689e-03  -2.0858221e-03  -1.8682322e-03  -1.6656406e-03   3.6631408e-05   1.5667712e-03   6.0274756e-04  -1.3117386e-03  -2.6437401e-03  -2.8187572e-03  -4.1767639e-03  -5.1221414e-03  -5.7697076e-03  -5.8569661e-03  -6.0868720e-03  -5.7311689e-03  -4.4570640e-03  -2.8383266e-03  -4.0636928e-03  -4.4441759e-03  -5.8695376e-03  -5.9764396e-03  -5.3338454e-03  -3.0503349e-03  -2.4597600e-03  -3.2056284e-04  -2.2343765e-04  -9.5518225e-04  -8.4290599e-05   1.4661937e-03   3.1463147e-03   7.8271469e-03   1.2977614e-02   1.5260782e-02   1.7439370e-02   2.0207797e-02   1.9994063e-02   1.8638380e-02   1.7838135e-02   1.5686786e-02   1.2204386e-02   9.0534480e-03   7.1487143e-03   5.4903060e-03   4.5000796e-03   2.7298568e-03   3.3733688e-03   3.1268950e-03   1.4353374e-03  -2.8856928e-04  -2.4724417e-04  -8.9437546e-04  -1.6814524e-04   1.5851495e-03   2.5174319e-03   3.8164459e-03   4.1878977e-03   3.7081851e-03   4.2674441e-03   6.0680783e-03   6.3965565e-03   7.3570341e-03   8.2358200e-03   8.3128374e-03   7.9207019e-03   8.1623463e-03   7.6089407e-03   7.9808508e-03   8.1274362e-03   5.8034149e-03   4.9514041e-03   4.0645046e-03   1.2991272e-03  -1.0505813e-03  -1.8664767e-03  -3.4730272e-03  -4.7567052e-03  -5.7160746e-03  -7.1707648e-03  -7.6775988e-03  -8.0490002e-03  -8.8478009e-03  -9.8552165e-03  -1.0644592e-02  -1.1664861e-02  -1.4053516e-02  -1.6590584e-02  -1.7435414e-02  -1.6182180e-02  -1.6337584e-02  -1.6066469e-02  -1.4499663e-02  -1.3559938e-02  -1.4551919e-02  -1.3740908e-02  -1.1309956e-02  -7.0363842e-03   5.1988497e-03   1.0953112e-02   2.4314938e-02   3.5074893e-02   4.6998980e-02   5.2962480e-02   6.0642688e-02   6.3496620e-02   6.9495419e-02   7.2796568e-02   6.3867711e-02   6.0122565e-02   5.3349652e-02   4.4888868e-02   3.1151647e-02   2.8170020e-02   2.2744730e-02   1.7699521e-02   1.3357325e-02   1.3592437e-02   1.3732592e-02   1.6749057e-02   1.8366479e-02   1.8456028e-02   1.8951426e-02   1.9537876e-02   1.9101766e-02   1.9693398e-02   2.2817535e-02   2.5291880e-02   3.0266008e-02   3.6265823e-02   4.3630741e-02   5.1393310e-02   5.9433846e-02   6.3544296e-02   6.6503377e-02   6.7650923e-02   6.6158633e-02   6.2910729e-02   5.8275103e-02   5.2602507e-02   4.5823472e-02   3.9388553e-02   3.3554265e-02   3.0330399e-02   2.7963479e-02   2.5631027e-02   2.2482350e-02   1.9270810e-02   1.6015388e-02   1.3320963e-02   1.2024598e-02   1.1739902e-02   1.1401315e-02   9.8220096e-03   8.1499904e-03   5.7195572e-03   2.2709086e-03  -3.9572718e-04  -8.4596248e-04  -4.8306791e-04  -4.0758770e-05   3.4784183e-03   7.5599724e-03   1.0682217e-02   1.3980863e-02   1.2936692e-02   9.9256935e-03   4.7637863e-03  -6.0451413e-04  -5.4808108e-04  -1.0324551e-03  -3.0208776e-03  -4.8463192e-03  -5.6152545e-03  -1.1941215e-02  -1.2317445e-02  -1.2532060e-02  -1.2100720e-02  -1.1982085e-02  -9.1442492e-03  -9.7809149e-03  -9.2029458e-03  -7.7568047e-03  -7.1199768e-03  -9.8231753e-03  -1.0115947e-02  -1.0348837e-02  -9.9203343e-03  -1.1541994e-02  -1.3416592e-02  -1.2810928e-02  -1.2458958e-02  -1.3895474e-02  -1.3067209e-02  -1.1003212e-02  -1.0559651e-02  -1.0322105e-02  -9.3446961e-03  -8.6151550e-03  -8.4405652e-03  -8.6311217e-03  -8.8168313e-03  -8.1936247e-03  -7.6213673e-03  -6.9688027e-03  -5.4385340e-03  -4.8748819e-03  -4.5973396e-03  -2.9602345e-03  -3.6131048e-03  -5.5636761e-03  -5.6396652e-03  -6.6247711e-03  -8.8435907e-03  -8.2992888e-03  -7.3183173e-03  -7.3394039e-03  -6.6842132e-03  -6.7806122e-03  -7.6834354e-03  -8.1847833e-03  -8.3284367e-03  -9.2619008e-03  -8.1384231e-03  -8.1070071e-03  -8.2650176e-03  -8.9734461e-03  -9.3096265e-03  -1.1862764e-02  -1.3116100e-02  -1.3501278e-02  -1.2377365e-02  -9.7391917e-03  -5.4913872e-03  -1.2519702e-03   3.0320422e-03   8.4086557e-03   1.2525462e-02   1.6870707e-02   2.1925908e-02   2.7301415e-02   3.1478371e-02   3.5648583e-02   4.0566937e-02   4.3463327e-02   4.6343542e-02   4.8697571e-02   5.1868539e-02   5.3345056e-02   5.5420275e-02   5.6006802e-02   5.5854243e-02   5.4194917e-02   5.1798133e-02   4.9575203e-02   4.7339244e-02   4.4958649e-02   4.0663653e-02   3.6596396e-02   3.2709038e-02   2.8335511e-02   2.4836570e-02   2.2842085e-02   2.0242128e-02   1.7870197e-02   1.5700239e-02   1.2369689e-02   9.4660041e-03   7.2327972e-03   5.2036113e-03   3.8075602e-03   2.7606792e-03   2.1093244e-03   2.1990178e-03   2.7524994e-03   4.2322105e-03   7.0156034e-03   1.5229498e-02   2.1328633e-02   2.4810057e-02   2.9594640e-02   3.5239301e-02   3.6065215e-02   4.0068054e-02   4.7426560e-02   5.3210750e-02   5.8536956e-02   6.5272672e-02   7.0769718e-02   7.4178938e-02   7.6563275e-02   7.7321107e-02   7.6284817e-02   7.4451356e-02   7.2506498e-02   6.8058639e-02   6.2487306e-02   5.7211626e-02   5.0777933e-02   4.4935202e-02   4.0721177e-02   3.6089906e-02   3.1085834e-02   2.6245862e-02   1.9715650e-02   1.4405416e-02   1.0761133e-02   7.0349212e-03   3.8796013e-03   1.1128818e-03  -1.9222530e-03  -5.2374552e-03  -9.5405151e-03  -1.2921077e-02  -1.5981310e-02  -1.8695607e-02  -2.0149295e-02  -2.2675645e-02  -2.4052836e-02  -2.4714578e-02  -2.5459554e-02  -2.6967246e-02  -2.4889426e-02  -2.2817076e-02  -2.2145247e-02  -1.9512405e-02  -1.5615458e-02  -1.2510659e-02  -1.0270580e-02  -6.2405512e-03  -4.0359930e-03  -2.9991582e-03  -2.2877037e-03  -1.6006749e-03  -1.2326796e-03  -1.1425154e-03  -7.9026755e-04  -8.7064674e-04  -9.6696455e-05   4.7053798e-04   2.9252435e-04   8.3593526e-04   1.5946479e-03   1.0708799e-03   8.4928082e-04   9.6573485e-04   2.6519832e-04  -4.7946046e-04  -1.5217848e-03  -1.7220205e-03  -1.9486599e-03  -1.8734020e-03  -3.4590154e-04   1.5283578e-03   2.4379300e-03   3.1806087e-03   3.2338364e-03   2.8693217e-03   3.6709170e-03   4.3594211e-03   5.7471184e-03   6.9569263e-03   8.3041031e-03   8.3952959e-03   9.8421630e-03   1.3336455e-02   1.5305892e-02   1.6113033e-02   1.7123473e-02   1.7009881e-02   1.4041841e-02   1.2406181e-02   1.0349138e-02   8.3480995e-03   6.7340982e-03   5.3330454e-03   3.5944787e-03   2.0457309e-03   7.5006946e-04  -2.6723261e-04  -1.1578279e-03  -2.1417439e-03  -2.6894042e-03  -3.0923720e-03  -4.3427226e-03  -4.7342059e-03  -4.5646103e-03  -5.2128848e-03  -6.0737600e-03  -7.6181598e-03  -7.9477589e-03  -8.5509480e-03  -8.5185518e-03  -8.3960375e-03  -6.7133414e-03  -6.5392649e-03  -5.8783460e-03  -4.2322194e-03  -1.6045041e-03   8.3129818e-04   2.7418537e-03   5.2086867e-03   7.3027532e-03   7.2970251e-03   6.6722128e-03   7.0298993e-03   6.4861620e-03   6.3439138e-03   7.5987227e-03   6.8976785e-03   6.5390115e-03   6.7479140e-03   7.1017054e-03   6.8611793e-03   9.9489730e-03   1.2639342e-02   1.4556456e-02   1.4418930e-02   1.6383214e-02   1.7067421e-02   1.6306770e-02   1.6809192e-02   1.8423215e-02   1.7990634e-02   1.7633941e-02   1.8634991e-02   1.9860979e-02   2.1259249e-02   2.1837488e-02   2.2667628e-02   2.3353451e-02   2.2115320e-02   2.0880792e-02   2.1720386e-02   2.1991032e-02   2.1703255e-02   2.2143497e-02   2.2402313e-02   2.1459458e-02   2.1299987e-02   1.8826699e-02   1.7496390e-02   1.5785524e-02   1.4086791e-02   1.2314848e-02   1.3197223e-02   1.1879942e-02   1.0206856e-02   9.1146312e-03   9.3047973e-03   8.7063658e-03   9.6268857e-03   1.0960622e-02   1.0744877e-02   8.4031262e-03   8.2294635e-03   8.5439958e-03   9.0082076e-03   1.0245223e-02   1.2318751e-02   1.3643658e-02   1.4825122e-02   1.6090498e-02   1.7699120e-02   1.9452435e-02   2.0436245e-02   2.1624773e-02   2.2083250e-02   2.2530636e-02   2.2319499e-02   2.2332555e-02   2.1453198e-02   2.2382073e-02   2.0949645e-02   1.9044776e-02   1.8209212e-02   1.6117476e-02   1.1570706e-02   9.3849902e-03   7.5313785e-03   3.2235665e-03   1.1586990e-03  -6.3640056e-04  -2.1060855e-03  -4.0735237e-03  -5.1016390e-03  -6.5919274e-03  -6.6504458e-03  -7.6464072e-03  -8.1267558e-03  -7.8703953e-03  -7.7316832e-03  -8.0143845e-03  -8.3993771e-03  -8.4952102e-03  -8.9103917e-03  -9.4543212e-03  -1.0084854e-02  -1.0742968e-02  -1.1137983e-02  -1.1467318e-02  -1.2043193e-02  -1.3018486e-02  -1.3712429e-02  -1.3830213e-02  -1.5101069e-02  -1.5936978e-02  -1.5563785e-02  -1.5972954e-02  -1.6232775e-02  -1.5713521e-02  -1.6316407e-02  -1.7376410e-02  -1.7512736e-02  -1.8239636e-02  -1.7657737e-02  -1.5858158e-02  -1.4802804e-02  -1.4377580e-02  -1.2542394e-02  -1.2986578e-02  -1.1980201e-02  -1.0944568e-02  -9.7557071e-03  -1.0939013e-02  -1.0497816e-02  -1.2194591e-02  -1.1311798e-02  -9.1634894e-03  -6.3704073e-03  -1.6718838e-03   5.3543481e-03   1.2953280e-02   2.4310696e-02   4.2513171e-02   6.7559643e-02   1.0097954e-01   1.4244732e-01   1.8857536e-01   2.3404867e-01   2.7237991e-01   2.9588974e-01   3.0012447e-01   2.8461013e-01   2.5236596e-01   2.0842359e-01   1.6237724e-01   1.2101741e-01   8.6483796e-02   6.0773585e-02   4.3928163e-02   3.3069922e-02   2.5649774e-02   2.1517220e-02   1.7435535e-02   1.4264398e-02   1.0049842e-02   6.6626018e-03   3.4428734e-03  -1.6940206e-03  -6.7001433e-03  -1.0490014e-02  -1.4963892e-02  -2.0139089e-02  -2.1172205e-02  -2.3676401e-02  -2.6208082e-02  -2.7442253e-02  -2.8482053e-02  -3.1399520e-02  -3.2632343e-02  -3.2877047e-02  -3.4416759e-02  -3.4491543e-02  -3.2899111e-02  -3.1694876e-02  -3.0275505e-02  -2.7585525e-02  -2.4295946e-02  -1.9693749e-02  -1.2991183e-02  -5.3958895e-03   2.8631476e-03   1.1281850e-02   1.9034313e-02   2.6111230e-02   3.2851221e-02   3.7878580e-02   4.2637154e-02   4.6075612e-02   4.5654638e-02   4.1740674e-02   3.8085854e-02   3.2429750e-02   2.5522295e-02   2.0860689e-02   1.7665526e-02   1.2993051e-02   8.7949351e-03   7.4029965e-03   4.1470886e-03   2.2384552e-03   2.0480488e-03   1.0617556e-03   2.0508376e-04   5.6908732e-04  -5.1491920e-04  -1.8564340e-03  -1.2721844e-03  -2.2067735e-03  -2.1382660e-03  -1.2401225e-03   1.0518107e-03   2.4779912e-03   3.3800876e-03   4.5760699e-03   5.7391292e-03   5.9138267e-03   5.9562569e-03   6.3720714e-03   6.7474649e-03   7.0640630e-03   6.0043428e-03   4.8701278e-03   4.5577270e-03   3.6344048e-03   2.0290763e-03   2.0285458e-03   2.4974331e-03   2.6879021e-03   3.0462706e-03   3.7295217e-03   3.9758263e-03   4.9924994e-03   5.5673057e-03   5.7971005e-03   7.0225429e-03   7.6012085e-03   6.2188796e-03   4.3080665e-03   2.6751200e-03   9.8873038e-04   3.0540982e-05   5.4217960e-04   1.2285226e-03   1.1202429e-03   2.6998496e-04  -1.1619211e-03  -2.7698402e-03  -2.5209449e-03  -2.4643980e-03  -2.7048802e-03  -3.7256191e-03  -3.4231620e-03  -3.8853098e-03  -2.9022614e-03  -9.5356879e-04   2.1951595e-03   3.0860587e-03   3.9297430e-03   4.7945426e-03   4.2591694e-03   4.6268998e-03   6.1993632e-03   7.2684266e-03   6.8641100e-03   7.8286221e-03   7.7038381e-03   6.0840879e-03   6.1139355e-03   7.0776749e-03   9.1924370e-03   1.0765110e-02   1.4659988e-02   1.4521424e-02   1.3751798e-02   1.2058256e-02   1.0355724e-02   8.1751905e-03   7.5134446e-03   8.2058199e-03   6.8864789e-03   6.5126375e-03   4.7920407e-03   3.5939271e-03   7.8661289e-04  -3.5356449e-04  -1.8572122e-03  -3.7874406e-03  -4.3735640e-03  -4.8887584e-03  -4.2033177e-03  -3.6250252e-03  -2.0777033e-03  -8.1480221e-04   1.7685235e-03   1.7575195e-03   1.8891936e-03   2.4918455e-03   1.4795118e-03   2.1982013e-04   6.5303644e-04   2.7243170e-03   4.6330274e-03   6.4447183e-03   8.8740617e-03   1.0273238e-02   9.6050133e-03   8.7000437e-03   9.4784935e-03   8.6490866e-03   8.6889533e-03   8.4670300e-03   8.0734433e-03   5.8376050e-03   4.7021541e-03   3.8369725e-03   1.9272963e-03   1.3500563e-04   1.3108461e-04  -6.0020322e-04  -2.6505883e-03  -2.8181724e-03  -2.2727773e-03  -2.4984115e-03  -2.7063858e-03  -2.5954671e-03  -2.7661005e-03  -2.7750720e-03  -2.4749641e-03  -9.7062619e-04   2.9044645e-03   6.9326118e-03   1.0499958e-02   1.5036794e-02   1.8765285e-02   2.0703163e-02   2.3558976e-02   2.7619553e-02   3.1708840e-02   3.6952154e-02   4.2955521e-02   4.7754391e-02   5.1046181e-02   5.3326574e-02   5.5143152e-02   5.5812451e-02   5.5254730e-02   5.4286462e-02   5.2715168e-02   5.0249300e-02   4.7745449e-02   4.5868002e-02   4.2709965e-02   3.8704093e-02   3.3553945e-02   2.6830432e-02   1.9795842e-02   1.3138936e-02   7.5354995e-03   3.0352756e-03  -2.1277203e-03  -7.4774720e-03  -1.2090006e-02  -1.5888803e-02  -1.8880916e-02  -1.9797703e-02  -1.9987681e-02  -2.0588759e-02  -2.1777782e-02  -2.3011229e-02  -2.3355368e-02  -2.3293534e-02  -2.2112945e-02  -2.0688304e-02  -1.8984199e-02  -1.7523813e-02  -1.6700002e-02  -1.5331595e-02  -1.2730650e-02  -1.1361011e-02  -1.1097436e-02  -9.1933333e-03  -7.2612548e-03  -5.4949876e-03  -2.0855558e-03   4.0720591e-03   1.0052611e-02   1.4749469e-02   1.9550429e-02   2.4049939e-02   2.7140022e-02   2.9830831e-02   3.3592835e-02   3.7387444e-02   4.0650026e-02   4.3238518e-02   4.4557105e-02   4.3735434e-02   4.1432035e-02   3.7922301e-02   3.3440474e-02   2.8959358e-02   2.4518525e-02   2.0022013e-02   1.6832678e-02   1.3872834e-02   1.0931812e-02   9.5884123e-03   8.4161006e-03   7.2802773e-03   6.6080665e-03   7.0275549e-03   6.6495393e-03   4.9635458e-03   3.4237886e-03   2.5852175e-03   3.0355844e-03   5.8973755e-03   1.0384510e-02   1.3769822e-02   1.8073870e-02   2.0305098e-02   2.0416227e-02   2.0125826e-02   1.9804936e-02   1.8203418e-02   1.8226018e-02   1.9332075e-02   1.9433306e-02   1.8780032e-02   1.7699560e-02   1.4879669e-02   1.1911636e-02   9.1138038e-03   6.7394097e-03   5.8514789e-03   4.3523830e-03   2.0877119e-03   7.8446072e-04  -1.6579775e-04  -1.1341098e-03  -1.0229621e-03  -1.0203154e-03  -1.8868508e-03  -1.3509468e-03  -4.1936201e-03  -5.4506618e-03  -7.1017800e-03  -9.7740349e-03  -1.1524703e-02  -1.0385707e-02  -1.0540368e-02  -1.0586383e-02  -9.2981612e-03  -7.5384567e-03  -7.7913134e-03  -8.3688155e-03  -9.0292859e-03  -8.5602062e-03  -1.0476853e-02  -8.9078910e-03  -6.5676150e-03  -4.3484888e-03  -2.1160024e-03   1.7872742e-03   2.2902728e-03   2.4592472e-03   4.5627471e-03   5.2018195e-03   7.3262371e-03   1.1180951e-02   1.6190182e-02   2.0757846e-02   2.7942357e-02   3.1531611e-02   3.5478951e-02   3.8547428e-02   4.1802408e-02   4.3151455e-02   4.4632554e-02   4.5055593e-02   4.4875448e-02   4.2419422e-02   3.9639058e-02   3.6598976e-02   3.3416058e-02   3.0327433e-02   2.8038368e-02   2.3977383e-02   1.9206780e-02   1.2935867e-02   5.7131138e-03  -2.5308674e-04  -4.3191361e-03  -7.7660470e-03  -9.7453327e-03  -1.0797372e-02  -1.2535773e-02  -1.3096659e-02  -1.4036437e-02  -1.5210815e-02  -1.4893677e-02  -1.4671931e-02  -1.6830711e-02  -1.7207331e-02  -1.4431160e-02  -1.2128338e-02  -1.0030425e-02  -5.4488675e-03  -1.1460740e-03   1.3195420e-04   5.2542145e-04   1.5419184e-03   1.2310709e-03   1.1716216e-03   1.2288199e-03   2.9758414e-03   2.1693413e-03   5.1578486e-03   7.9632867e-03   9.5845825e-03   9.5748667e-03   1.0594192e-02   8.1286784e-03   5.6901666e-03   6.8764982e-03   6.3138924e-03   7.5302741e-03   9.9715959e-03   1.1687827e-02   1.0567516e-02   1.2860045e-02   1.3910805e-02   1.3440790e-02   1.2521487e-02   1.2428516e-02   1.1126420e-02   1.2114872e-02   1.3595832e-02   1.6249032e-02   1.8997446e-02   2.0467117e-02   1.9287565e-02   1.7247066e-02   1.4906475e-02   1.2908934e-02   1.2112365e-02   1.3010479e-02   1.3353458e-02   1.3718762e-02   1.4172353e-02   1.5947139e-02   1.5957959e-02   1.6343694e-02   1.6348320e-02   1.4977278e-02   1.2499245e-02   9.5005957e-03   8.1261752e-03   9.2832943e-03   8.3490725e-03   7.7828044e-03   8.7438703e-03   9.1868766e-03   7.5185146e-03   8.8296709e-03   9.3760044e-03   8.7655557e-03   8.4289694e-03   9.9980992e-03   1.0382975e-02   1.0628250e-02   1.1407462e-02   1.2691152e-02   1.1648689e-02   1.2012231e-02   9.9542809e-03   9.4687933e-03   1.0124190e-02   1.1386270e-02   1.0309025e-02   1.2217166e-02   1.3342254e-02   1.1703231e-02   9.8541419e-03   1.0367233e-02   1.0848530e-02   1.1860784e-02   1.2173234e-02   1.3338451e-02   1.2855914e-02   9.9150480e-03   7.8363660e-03   6.2505149e-03   2.7644806e-03   1.2464606e-03   2.2252585e-03   1.4528930e-03   1.0715369e-04   4.8747302e-04   4.6625117e-04  -6.2348380e-04  -1.1355198e-03  -1.7798679e-03  -1.3512516e-03  -3.1562700e-03  -3.1586679e-03  -3.5043666e-03  -3.0769785e-03  -5.2967148e-03  -6.0461101e-03  -8.1623117e-03  -9.9516232e-03  -1.1515250e-02  -1.2500704e-02  -1.1900431e-02  -1.2627369e-02  -1.4075620e-02  -1.3040099e-02  -1.1643537e-02  -1.2358975e-02  -1.1074613e-02  -7.5044432e-03  -7.1257324e-03  -7.2826742e-03  -6.1000550e-03  -6.0825987e-03  -7.3532236e-03  -8.1877798e-03  -8.2496474e-03  -7.8388373e-03  -6.6869884e-03  -4.3038032e-03  -2.2014876e-03   1.0350930e-03   2.1054983e-03   4.1735118e-03   4.4609996e-03   6.1597982e-03   7.8249585e-03   9.3369413e-03   8.9350667e-03   6.9375181e-03   5.1933576e-03   3.6946831e-03   3.8155814e-03   3.2866950e-03   4.4940710e-03   6.0851377e-03   6.7749890e-03   7.5332286e-03   9.7566774e-03   1.2129410e-02   1.2291650e-02   1.3967661e-02   1.5585384e-02   1.3307710e-02   1.0849390e-02   1.1465874e-02   9.4945555e-03   8.1507759e-03   1.1415779e-02   1.5622114e-02   1.5425411e-02   1.5399959e-02   1.6226594e-02   1.7618209e-02   1.6730525e-02   1.9327363e-02   2.1091344e-02   2.0547793e-02   1.8401737e-02   1.7466079e-02   1.5946571e-02   1.4649690e-02   1.2981753e-02   1.2881282e-02   1.2425258e-02   1.0875478e-02   1.1407936e-02   1.2647919e-02   1.2691069e-02   1.4115789e-02   1.5703338e-02   1.5560535e-02   1.5286164e-02   1.4866441e-02   1.3081150e-02   1.2170527e-02   1.1903278e-02   1.3555317e-02   1.7556497e-02   2.2087871e-02   2.4963152e-02   2.8502889e-02   3.1753625e-02   3.3321232e-02   3.5433078e-02   3.8737106e-02   4.0566211e-02   4.0603256e-02   3.8441388e-02   3.6744716e-02   3.5661867e-02   3.5040010e-02   3.4108402e-02   3.3670870e-02   3.1198652e-02   2.6363839e-02   2.3971013e-02   2.3343639e-02   2.1239307e-02   1.9762757e-02   1.8563829e-02   1.4814758e-02   1.0580701e-02   8.3119359e-03   6.3956961e-03   4.8477120e-03   3.9289295e-03   4.0514737e-03   4.8257538e-03   4.1169477e-03   4.3691519e-03   4.0857101e-03   1.9632254e-03   6.6688102e-04  -1.3802042e-03  -1.8808508e-03  -2.4524145e-03  -2.4033469e-03  -3.7258758e-03  -2.5694255e-03  -1.8892064e-03  -2.6336507e-03  -3.3454090e-03  -3.2160270e-03  -3.3633311e-03  -4.4725986e-03  -3.6848426e-03  -3.4799312e-03  -3.9913359e-03  -4.0478260e-03  -3.6626342e-03  -4.6593385e-03  -4.6865850e-03  -4.0556286e-03  -4.8824866e-03  -6.5583232e-03  -8.0453679e-03  -7.7472780e-03  -7.7917699e-03  -6.8048474e-03  -6.1072044e-03  -5.2307688e-03  -6.5672937e-03  -6.8416744e-03  -7.5979690e-03  -7.4446114e-03  -6.2322880e-03  -5.3864687e-03  -7.3486721e-03  -9.0071555e-03  -1.0021631e-02  -1.1056906e-02  -1.2081390e-02  -1.1446954e-02  -9.7777896e-03  -8.6946672e-03  -8.1119543e-03  -6.7953014e-03  -5.2428375e-03  -3.1273718e-03  -3.3927352e-03  -1.4590594e-03  -3.5834893e-04   3.1152942e-04  -1.0094582e-03   4.6178859e-04  -2.3358497e-04  -2.2289339e-04   2.4883215e-04   7.4696021e-04   3.1899848e-04   1.3627020e-04   5.4162975e-04   1.7305965e-03   3.5908382e-03   5.0662965e-03   6.8017660e-03   7.5162277e-03   6.2141520e-03   5.0303563e-03   5.2023024e-03   5.5954644e-03   5.7822048e-03   7.1976486e-03   7.9158511e-03   8.3713719e-03   8.2303036e-03   8.6474529e-03   9.3267893e-03   1.0437732e-02   1.0908918e-02   1.1035989e-02   1.0360048e-02   9.7504307e-03   9.3321392e-03   8.2045134e-03   8.4945691e-03   9.0163414e-03   8.6888184e-03   7.8663719e-03   7.0918560e-03   4.9851371e-03   3.7191720e-03   2.5727176e-03   7.5050085e-04  -3.2496211e-04  -5.7110809e-04  -8.3392797e-04  -1.2730735e-03  -1.6187464e-03  -1.7909507e-03  -2.2868045e-03  -3.8786050e-03  -4.6778663e-03  -5.2194259e-03  -5.2477485e-03  -5.9830664e-03  -6.3880687e-03  -7.1886302e-03  -7.4580986e-03  -8.8863089e-03  -1.0771944e-02  -1.1651474e-02  -1.2922043e-02  -1.4557740e-02  -1.5791881e-02  -1.5871487e-02  -1.6904436e-02  -1.7078477e-02  -1.7644444e-02  -1.8111861e-02  -1.8909084e-02  -1.8834696e-02  -1.9320879e-02  -1.8880156e-02  -1.7881257e-02  -1.6530935e-02  -1.5213242e-02  -1.3183307e-02  -1.1020178e-02  -8.5804552e-03  -4.7873724e-03  -9.3472802e-04   3.6859164e-03   8.2932489e-03   1.4485813e-02   1.9690434e-02   2.5519804e-02   3.1339600e-02   3.6839693e-02   4.0769799e-02   4.4589048e-02   4.7761431e-02   5.0295210e-02   5.2477939e-02   5.3610684e-02   5.5138069e-02   5.6623181e-02   5.8966727e-02   6.2474606e-02   6.7861339e-02   7.1406900e-02   7.5868877e-02   7.9645750e-02   8.3057510e-02   8.5447412e-02   8.8721386e-02   9.1348383e-02   9.2474794e-02   9.2692850e-02   9.1865197e-02   8.9774004e-02   8.6698814e-02   8.2791352e-02   7.9440206e-02   7.5357214e-02   7.2913341e-02   6.9850663e-02   6.7301081e-02   6.3921483e-02   6.1149344e-02   5.7419973e-02   5.4822493e-02   5.3416128e-02   5.3032897e-02   5.3659308e-02   5.4526724e-02   5.4971948e-02   5.4772080e-02   5.3871118e-02   5.2863936e-02   5.1705912e-02   5.0929073e-02   4.8953958e-02   4.6815743e-02   4.3994206e-02   4.0923164e-02   3.6590940e-02   3.3262450e-02   3.0230555e-02   2.7531390e-02   2.3657672e-02   2.0497216e-02   1.7299394e-02   1.3515922e-02   1.0079721e-02   7.5045598e-03   4.8261382e-03   1.3904133e-03  -1.2938506e-03  -4.0810308e-03  -6.7244163e-03  -9.3610668e-03  -1.0690540e-02  -1.2490658e-02  -1.4604665e-02  -1.6150127e-02  -1.7826479e-02  -1.9578842e-02  -2.0426566e-02  -2.1398736e-02  -2.2715323e-02  -2.2096485e-02  -2.1453898e-02  -2.1381263e-02  -2.0816327e-02  -2.0331428e-02  -2.0673529e-02  -2.0164503e-02  -1.9979181e-02  -1.9837149e-02  -1.8936404e-02  -1.8040387e-02  -1.7568080e-02  -1.6510198e-02  -1.5630969e-02  -1.4830555e-02  -1.4191310e-02  -1.3690670e-02  -1.2559181e-02  -1.1165213e-02  -9.8973640e-03  -8.6213073e-03  -7.1842475e-03  -6.4973325e-03  -6.0230719e-03  -5.1107152e-03  -4.5555780e-03  -4.3377678e-03  -3.6435351e-03  -2.4936499e-03  -1.9727106e-03  -1.7975908e-03  -1.2206296e-03  -1.1937400e-03  -1.0104138e-03  -4.6836581e-04   5.8638710e-04   1.2767380e-03   2.4850575e-03   3.2251853e-03   4.1173922e-03   4.3457547e-03   4.6035248e-03   5.0414369e-03   5.2940801e-03   5.3253428e-03   5.9805527e-03   6.5957649e-03   6.9666327e-03   7.6157196e-03   8.0034451e-03   8.6832210e-03   9.5180519e-03   9.9004164e-03   1.0400268e-02   1.0990153e-02   1.1629100e-02   1.1787607e-02   1.1919772e-02   1.2045002e-02   1.2855156e-02   1.3526567e-02   1.4055106e-02   1.4433806e-02   1.4657871e-02   1.4086847e-02   1.3337693e-02   1.3268488e-02   1.3089297e-02   1.2973257e-02   1.2640061e-02   1.2242984e-02   1.1180745e-02   1.0394487e-02   9.7962002e-03   9.6899855e-03   1.0221251e-02   1.0874128e-02   1.1108753e-02   1.0963923e-02   1.0619184e-02   9.8772500e-03   8.4059223e-03   7.9692058e-03   7.3156464e-03   6.6618035e-03   5.6775124e-03   5.5388922e-03   4.8364848e-03   4.2720427e-03   3.6456090e-03   2.7077092e-03   2.5524333e-03   2.2890078e-03   1.5080467e-03   1.2848683e-03   2.0751843e-03   2.4876696e-03   2.5269086e-03   3.0408344e-03   3.4990137e-03   3.0753363e-03   2.4671211e-03   1.9543607e-03   2.2962883e-03   2.5241800e-03   3.2222120e-03   3.6863820e-03   5.4273326e-03   6.3893693e-03   6.6368151e-03   6.8516397e-03   7.8691275e-03   8.3955585e-03   8.8894770e-03   1.0113366e-02   1.0265800e-02   1.0257261e-02   1.0228820e-02   1.0145971e-02   9.8778092e-03   1.0314742e-02   1.0636707e-02   1.0682787e-02   1.0582696e-02   9.7971118e-03   9.2279461e-03   8.6247553e-03   7.2072725e-03   6.3308714e-03   5.6202040e-03   4.5325244e-03   3.4777311e-03   3.3324107e-03   2.7028286e-03   2.4671137e-03   2.2384610e-03   1.0160731e-03  -4.2465745e-04  -1.4591749e-03  -2.4713195e-03  -2.9260091e-03  -2.9802752e-03  -2.7503767e-03  -2.4239340e-03  -2.3916933e-03  -2.4662425e-03  -2.0818526e-03  -1.7815748e-03  -1.9675088e-03  -2.6100280e-03  -3.4035795e-03  -4.3013616e-03  -5.2992086e-03  -5.7569710e-03  -5.2672920e-03  -4.9100293e-03  -4.1496473e-03  -3.1642847e-03  -2.1287721e-03  -7.1620972e-04   6.2917737e-04   1.7966386e-03   3.2379126e-03   4.6779050e-03   6.3740194e-03   6.9988021e-03   7.0414737e-03   6.7646063e-03   6.8930124e-03   5.7660082e-03   6.1929401e-03   7.5534542e-03   8.6237997e-03   8.4254388e-03   9.0095809e-03   9.0393345e-03   7.5250470e-03   5.5677862e-03   3.9141436e-03   1.8019285e-03  -3.4577610e-04  -1.7386456e-03  -2.7183155e-03  -3.9005672e-03  -4.6031765e-03  -4.8876078e-03  -5.0694012e-03  -4.5762829e-03  -3.5696541e-03  -2.6679452e-03  -2.0336436e-03  -5.4616844e-04  -3.9858720e-04   4.8964277e-04   1.0779974e-03   2.7229760e-03   3.4935461e-03   5.6905987e-03   7.1417539e-03   8.5514851e-03   1.0008755e-02   1.2442624e-02   1.4208044e-02   1.6525113e-02   1.9511183e-02   2.2059332e-02   2.3323069e-02   2.4156551e-02   2.4011472e-02   2.2824603e-02   2.0852192e-02   1.9264565e-02   1.7891614e-02   1.5591127e-02   1.4050424e-02   1.2481864e-02   1.1276170e-02   1.0232605e-02   1.0011388e-02   1.0355205e-02   1.1028612e-02   1.1137247e-02   1.1396660e-02   1.2524131e-02   1.2327341e-02   1.2246072e-02   1.2346848e-02   1.1885558e-02   1.0298159e-02   9.1985129e-03   7.1607551e-03   4.8046977e-03   2.4537283e-03   6.0894945e-04  -1.0034935e-03  -2.8718088e-03  -4.7966037e-03  -6.1743518e-03  -7.6591114e-03  -9.7401435e-03  -1.0789264e-02  -1.1406501e-02  -1.1200506e-02  -1.1260821e-02  -1.1367987e-02  -1.1826430e-02  -1.1721186e-02  -1.2696000e-02  -1.2790650e-02  -1.2673592e-02  -1.2041008e-02  -1.2089274e-02  -1.1278409e-02  -1.0954791e-02  -1.0769224e-02  -1.0842844e-02  -1.0319475e-02  -1.0308021e-02  -1.0150245e-02  -9.3220624e-03  -8.6588587e-03  -8.3851007e-03  -8.4690743e-03  -7.7145432e-03  -6.3122167e-03  -4.9594027e-03  -3.0997889e-03  -9.0027464e-04   4.7206974e-04   1.0723102e-03   2.5412108e-03   4.3462953e-03   6.3701233e-03   8.8338669e-03   1.1534403e-02   1.4124638e-02   1.5760807e-02   1.7820386e-02   2.0085319e-02   2.2194808e-02   2.4195730e-02   2.6568045e-02   2.8401221e-02   3.0354971e-02   3.2680651e-02   3.5126512e-02   3.7606294e-02   3.9604564e-02   4.1140435e-02   4.2290895e-02   4.2386798e-02   4.2241570e-02   4.2641516e-02   4.1909128e-02   4.1242586e-02   4.0500539e-02   3.9793707e-02   3.8800592e-02   3.8758641e-02   3.8102144e-02   3.7173391e-02   3.5976959e-02   3.4574432e-02   3.3091663e-02   3.1860375e-02   3.1387703e-02   3.0601786e-02   2.9039094e-02   2.8310693e-02   2.6614730e-02   2.5826381e-02   2.5188496e-02   2.5549928e-02   2.5077368e-02   2.5017041e-02   2.4341293e-02   2.3986567e-02   2.2370229e-02   2.1645229e-02   2.1679897e-02   2.1320281e-02   2.0274100e-02   2.0100338e-02   1.8684131e-02   1.6776837e-02   1.4953229e-02   1.3664098e-02   1.2438532e-02   1.1030005e-02   9.7449176e-03   9.0167198e-03   8.2049562e-03   6.7290643e-03   6.2815333e-03   5.3147461e-03   4.3402413e-03   3.6010273e-03   3.9250036e-03   3.4128612e-03   3.4293221e-03   2.9620747e-03   2.4681994e-03   1.2335863e-03   4.8130572e-04  -3.8628972e-04  -5.6624137e-04  -1.5829384e-03  -1.9295907e-03  -2.1680476e-03  -2.3878681e-03  -3.3051377e-03  -3.1597141e-03  -3.3521781e-03  -4.0470189e-03  -4.2170699e-03  -4.1742386e-03  -4.8863962e-03  -5.6043032e-03  -5.7359528e-03  -6.7303436e-03  -7.0519799e-03  -7.5205792e-03  -7.5401998e-03  -7.8602632e-03  -7.4059906e-03  -7.8481402e-03  -7.9878515e-03  -8.3407499e-03  -8.3428251e-03  -8.2440084e-03  -8.3785338e-03  -8.1283179e-03  -8.1585607e-03  -8.2846492e-03  -8.4399370e-03  -7.7584455e-03  -7.1044544e-03  -6.6238695e-03  -6.2687817e-03  -5.5205021e-03  -5.1611384e-03  -5.1273161e-03  -4.5457966e-03  -4.0157020e-03  -3.8614445e-03  -3.6274082e-03  -3.3524240e-03  -2.8201157e-03  -2.3363393e-03  -1.7931476e-03  -1.4646067e-03  -1.1436793e-03  -9.1564166e-04  -7.7065556e-04  -1.1462557e-03  -1.1302994e-03  -6.8568953e-04  -2.2827138e-05   4.3779776e-04   1.2894094e-03   1.6792754e-03   1.6239438e-03   1.8972471e-03   2.0580853e-03   1.9270519e-03   2.2510508e-03   2.9686837e-03   2.6959185e-03   2.5397769e-03   2.8465181e-03   2.8784287e-03   2.9861059e-03   3.1421080e-03   3.6880507e-03   3.7858792e-03   3.5689361e-03   3.4264813e-03   3.5832760e-03   3.6087387e-03   3.9813087e-03   4.6390797e-03   4.7270173e-03   5.1122040e-03   5.2079200e-03   4.9300269e-03   4.9402508e-03   5.0235339e-03   4.5304437e-03   4.0164773e-03   4.0863367e-03   3.9885641e-03   3.6671099e-03   3.6646641e-03   3.8662550e-03   3.5815336e-03   3.3199021e-03   3.3049725e-03   3.7284231e-03   3.6972187e-03   3.8324327e-03   3.8685628e-03   4.1113531e-03   3.8047055e-03   4.1074804e-03   4.0911450e-03   4.1268457e-03   3.7798890e-03   3.6102231e-03   3.0869906e-03   2.8638377e-03   2.4017331e-03   2.3482274e-03   2.1687286e-03   1.9848938e-03   1.6047036e-03   1.5398827e-03   1.1779803e-03   1.0507474e-03   1.3234366e-03   1.3885375e-03   1.4980481e-03   1.8981599e-03   1.9312224e-03   1.7572073e-03   1.8112771e-03   1.6873848e-03   1.6215366e-03   1.1768170e-03   8.9728100e-04   1.0896424e-03   1.2127562e-03   1.0704842e-03   1.1576530e-03   1.2269076e-03   1.0240682e-03   1.0040299e-03   1.1325448e-03   1.4991750e-03   1.4982737e-03   1.6637285e-03   1.8661525e-03   1.5568128e-03   1.5438092e-03   1.6829089e-03   1.8119288e-03   1.5866789e-03   1.7868659e-03   1.7923282e-03   1.8402644e-03   1.6319502e-03   2.0352830e-03   2.0380819e-03   2.2988265e-03   2.2584335e-03   2.2347761e-03   1.5642434e-03   1.6311474e-03   1.3684130e-03   1.5405467e-03   1.5555352e-03   1.8181749e-03   1.7035697e-03   1.4757144e-03   1.1516923e-03   9.5812659e-04   9.2222419e-04   1.0430670e-03   1.2352644e-03   1.4586541e-03   1.7375719e-03   2.0933088e-03   2.2969689e-03   2.3297397e-03   2.3779748e-03   2.5247337e-03   1.9892735e-03   1.7270225e-03   1.4375010e-03   1.0547257e-03   3.7932179e-04   4.7407103e-04   1.6329058e-04   8.1193171e-06  -2.1117858e-04  -2.9445840e-04  -8.2822803e-04  -9.5559237e-04  -9.3043333e-04  -5.9803398e-04  -2.2212566e-04   8.1090034e-05   1.3734053e-04   1.3728666e-04  -4.8793028e-04  -9.8746954e-04  -2.4441448e-03
  -1.0977025e-02  -5.8978972e-03  -4.0954767e-03  -2.8073110e-03  -1.8140165e-03  -3.0418227e-03  -4.6297690e-03  -4.7910774e-03  -4.5512849e-03  -4.3517774e-03  -2.6545100e-03  -1.2989658e-03   2.3662184e-03   3.3289223e-03   3.4883172e-03   3.8569526e-03   4.1368780e-03   2.3262091e-03   4.9765043e-03   6.6290986e-03   7.1426298e-03   7.6726066e-03   7.6376755e-03   5.8509965e-03   5.5215440e-03   6.1624979e-03   8.2292028e-03   9.4633897e-03   1.0130140e-02   1.1131007e-02   1.2133868e-02   1.1335529e-02   1.0294777e-02   9.4365082e-03   1.0077317e-02   1.0728490e-02   1.1422895e-02   1.3361317e-02   1.5126920e-02   1.4790807e-02   1.4867544e-02   1.5658608e-02   1.5116729e-02   1.3855393e-02   1.2286264e-02   1.0704019e-02   9.2101677e-03   8.2299810e-03   7.7262851e-03   7.6962341e-03   5.8972910e-03   5.1990498e-03   4.7428338e-03   3.8950720e-03   3.3911889e-03   4.2473628e-03   3.2663358e-03   3.0319242e-03   3.8287668e-03   2.5923472e-03   5.6214798e-04  -9.0020240e-06  -1.1054952e-03  -1.9666276e-03  -6.9612140e-04   1.7187348e-05   1.8096965e-04   1.5666342e-03   1.8936016e-03   1.4166187e-03   2.0367077e-03   2.2319641e-03   1.6026700e-03   2.4029400e-03   3.8064251e-03   6.1954983e-03   8.2462355e-03   1.0008736e-02   1.1042146e-02   1.1475944e-02   1.0580801e-02   1.0601223e-02   1.3067789e-02   1.3689906e-02   1.5233229e-02   1.6781980e-02   1.8694102e-02   1.8996472e-02   2.1083063e-02   2.1495153e-02   2.0624268e-02   1.9068451e-02   1.8046535e-02   1.5706922e-02   1.3722407e-02   1.2638506e-02   1.1177469e-02   8.8402794e-03   7.5961053e-03   6.1955326e-03   7.6060291e-03   7.4469293e-03   6.5765170e-03   6.6703861e-03   7.3480447e-03   5.3773941e-03   5.2199001e-03   4.4852424e-03   5.3723909e-04  -2.0382552e-03  -4.8475799e-03  -7.9531022e-03  -9.5072461e-03  -8.0508088e-03  -8.5204213e-03  -9.2120423e-03  -8.1544025e-03  -8.6803155e-03  -8.9965835e-03  -9.0769417e-03  -8.9142600e-03  -1.0265486e-02  -1.0935976e-02  -1.3193413e-02  -1.4047468e-02  -1.5144916e-02  -1.5275894e-02  -1.5605177e-02  -1.4846650e-02  -1.5171049e-02  -1.5189615e-02  -1.6207281e-02  -1.5758819e-02  -1.6491681e-02  -1.5606998e-02  -1.5372275e-02  -1.3978867e-02  -1.4049619e-02  -1.2751575e-02  -1.1770626e-02  -9.6681555e-03  -9.0725028e-03  -6.0155099e-03  -3.2618160e-03  -4.1856663e-04   1.6333311e-03   3.1883270e-03   2.9648882e-03   3.2860802e-03   2.5345956e-03   3.0714569e-03   4.6915914e-03   6.3411677e-03   8.8039820e-03   1.1799948e-02   1.3947420e-02   1.5427451e-02   1.6995108e-02   1.7586275e-02   1.8147710e-02   1.9689891e-02   2.0032188e-02   2.1253822e-02   2.3491850e-02   2.5644443e-02   2.7493290e-02   3.1692633e-02   3.6109081e-02   3.8682849e-02   4.1267768e-02   4.3547787e-02   4.6717683e-02   4.8680176e-02   5.0401550e-02   5.1722095e-02   5.3807307e-02   5.3246755e-02   5.2802577e-02   5.3131829e-02   5.2023891e-02   4.9907093e-02   4.8828640e-02   4.6865536e-02   4.3441289e-02   3.9874181e-02   3.6432209e-02   3.3004258e-02   2.9701553e-02   2.6542442e-02   2.4675567e-02   2.3559799e-02   2.1910894e-02   1.9644886e-02   1.8511860e-02   1.7775813e-02   1.5192525e-02   1.4832676e-02   1.5666440e-02   1.6907980e-02   1.6538228e-02   1.7986749e-02   1.8302289e-02   1.7372929e-02   1.6327827e-02   1.5645071e-02   1.4648418e-02   1.1907801e-02   9.5255891e-03   6.5102298e-03   4.2435166e-03   9.7247511e-04  -1.8795317e-03  -3.1540969e-03  -4.6101964e-03  -6.3136106e-03  -6.6354485e-03  -5.7137643e-03  -6.1838547e-03  -6.7046741e-03  -6.6055076e-03  -6.7021247e-03  -7.8109285e-03  -8.4543201e-03  -8.1142726e-03  -6.3699283e-03  -5.4680506e-03  -4.4273725e-03  -4.3024573e-03  -4.2231348e-03  -4.8082707e-03  -5.1031757e-03  -4.9992575e-03  -2.2527402e-03  -5.5627804e-04   1.6781454e-03   2.7002227e-03   3.9770361e-03   3.7898947e-03   4.0748364e-03   3.2419048e-03   4.4679219e-03   4.7236736e-03   3.3168421e-03   3.6381943e-03   2.5758369e-03   1.9319298e-03   1.9948338e-03   2.1055257e-03   2.6658538e-04   7.4962714e-04   8.1343566e-04  -1.0091360e-03  -4.2040011e-04   3.6638136e-04  -1.8064390e-05  -1.0351362e-03  -9.3991932e-04  -1.1303903e-03   8.6952508e-04   2.6754966e-03   3.5227606e-03   5.1631486e-03   5.7419551e-03   4.8914204e-03   5.0425449e-03   6.6257652e-03   7.3224300e-03   7.7806661e-03   8.3577465e-03   7.8100988e-03   5.7595395e-03   6.8029573e-03   7.1973594e-03   8.1639643e-03   9.3914524e-03   1.1596860e-02   1.0772301e-02   1.1262909e-02   1.2336587e-02   1.4676153e-02   1.4089903e-02   1.4585562e-02   1.7934557e-02   1.7273108e-02   1.4546192e-02   1.3591648e-02   1.2079234e-02   8.6147862e-03   7.5465185e-03   5.9909348e-03   7.4514461e-03   8.3869727e-03   8.4527856e-03   7.6685007e-03   6.9968407e-03   4.2320655e-03   2.9999691e-03   1.8929161e-03   1.2525557e-03   3.0038708e-03   4.5457279e-03   4.1383896e-03   3.2935264e-03   2.2520022e-03  -7.3735104e-04  -2.9733128e-03  -3.2965708e-03  -3.5801054e-03  -4.0344081e-03  -3.1865672e-03  -1.8767369e-03  -1.1498797e-03  -1.4578191e-03  -1.1267410e-03  -2.1235610e-03  -3.8586799e-03  -5.5456476e-03  -6.8319859e-03  -8.8338833e-03  -8.9567372e-03  -8.1526320e-03  -8.3979190e-03  -9.3542926e-03  -7.5991971e-03  -6.7152393e-03  -8.1550245e-03  -9.0701473e-03  -7.2290586e-03  -6.3422404e-03  -6.1727857e-03  -5.3664006e-03  -4.0669921e-03  -2.4821234e-03  -2.9914091e-03  -3.2335922e-03  -3.8921967e-03  -4.0113831e-03  -5.2532638e-03  -5.9100889e-03  -6.1693943e-03  -4.8181788e-03  -3.3526196e-03  -2.4700574e-03  -8.7037174e-04  -5.2236089e-04  -1.1522355e-03  -2.8867654e-03  -4.5505864e-03  -6.5628407e-03  -7.4391865e-03  -7.1886179e-03  -6.4738972e-03  -4.7910811e-03  -3.9281273e-03  -2.8029823e-03  -1.5493579e-03   3.1415945e-04   3.1969978e-03   8.3156971e-03   1.5320970e-02   2.5880070e-02   3.8637959e-02   5.1411805e-02   6.7643425e-02   8.1014498e-02   9.0319029e-02   9.4135775e-02   9.3457608e-02   8.4578628e-02   7.2169889e-02   5.6213898e-02   4.0820168e-02   2.6492759e-02   1.3325175e-02   3.9659677e-03  -1.5018340e-03  -5.0666034e-03  -8.0224130e-03  -8.4224744e-03  -8.6327171e-03  -1.0202775e-02  -1.1989723e-02  -1.2754958e-02  -1.4640614e-02  -1.6388176e-02  -1.8583007e-02  -1.8029843e-02  -1.7708762e-02  -1.6630696e-02  -1.4253548e-02  -1.0324964e-02  -8.2785591e-03  -5.0400309e-03  -6.3172245e-04   5.0545442e-03   1.3281710e-02   2.3708064e-02   3.6221928e-02   4.9563548e-02   6.2737858e-02   7.4220044e-02   8.0557298e-02   8.1536066e-02   7.8844740e-02   7.0982052e-02   5.9577550e-02   4.8421225e-02   3.7424594e-02   2.7030098e-02   2.0090033e-02   1.4774277e-02   1.0450155e-02   7.1257498e-03   5.3113470e-03   3.5321156e-03   3.0274256e-03   3.3293254e-03   2.3347633e-03   3.4253239e-04  -1.0924501e-03  -2.1103711e-03  -3.4977486e-03  -2.9342953e-03  -1.4337405e-03   2.0644685e-04   6.8935269e-04   1.3647955e-03   2.8339147e-03   3.4927692e-03   4.1558314e-03   4.6500774e-03   4.9037313e-03   3.2028702e-03   3.5422405e-03   2.5588217e-03   2.8139255e-03   4.2299665e-03   7.5279167e-03   9.3548509e-03   1.0575837e-02   1.1068939e-02   1.0876084e-02   1.0160066e-02   9.8284939e-03   8.6244725e-03   7.8497111e-03   6.7558729e-03   5.3037321e-03   4.0382824e-03   3.8194929e-03   2.8601326e-03   3.3079593e-03   3.6347574e-03   3.9581789e-03   4.2478908e-03   4.0899629e-03   1.6826696e-03   8.5392878e-04   2.9941060e-04  -2.8626735e-04  -9.0887104e-04  -1.8665265e-04  -1.7149820e-04  -8.5614203e-04  -8.5297592e-04  -1.0472629e-03  -1.2748660e-03  -2.1825936e-03  -2.6221791e-03  -4.6929744e-03  -6.0018506e-03  -6.4435173e-03  -6.1429542e-03  -7.2328334e-03  -6.7511260e-03  -5.6913634e-03  -7.1633624e-03  -8.9529861e-03  -8.9094562e-03  -9.0904271e-03  -8.2742099e-03  -6.0806701e-03  -3.9027664e-03  -3.1442154e-03  -2.1843049e-03  -1.4888078e-03  -3.2551635e-04   3.4631535e-04   2.2233192e-03   4.9618496e-03   6.8436278e-03   9.6316192e-03   1.4692179e-02   1.7640431e-02   2.0651798e-02   2.2817959e-02   2.2800267e-02   2.1421876e-02   2.1171680e-02   1.8798949e-02   1.6598274e-02   1.5445109e-02   1.3028299e-02   9.7343274e-03   8.0018132e-03   7.2573593e-03   5.9194906e-03   4.8185668e-03   4.1625437e-03   3.3621834e-03   2.3530700e-03   1.7374823e-03   1.0384113e-03   4.3316125e-04  -3.9872342e-04  -6.7564231e-04   1.1675620e-03   2.1081327e-03   4.4461805e-03   3.9389432e-03   3.8488018e-03   2.4540385e-03   2.2293285e-03   1.2758741e-03   2.4972620e-03   2.3807691e-03   2.3543690e-03   2.0518171e-03   1.0452809e-03   7.0033617e-05  -3.9255687e-04  -1.4076523e-03  -6.7897200e-04   6.4207423e-04   1.9437281e-03   1.2336257e-03   4.5399435e-04  -1.7687231e-03  -4.7879443e-03  -6.8087446e-03  -7.2806225e-03  -9.0448099e-03  -9.3132462e-03  -9.1101593e-03  -9.9448309e-03  -9.4330505e-03  -8.4270767e-03  -9.2659845e-03  -9.1384908e-03  -8.5437759e-03  -9.4533595e-03  -8.7836433e-03  -7.2734408e-03  -6.2902920e-03  -4.0397697e-03  -2.3753893e-03  -1.5254627e-03   1.3217088e-03   2.5185069e-03   3.5261230e-03   5.5594056e-03   8.8921691e-03   1.1428738e-02   1.4430686e-02   1.6551549e-02   1.8861652e-02   2.0419361e-02   2.1176610e-02   2.2000837e-02   2.1731130e-02   2.2357845e-02   2.1486069e-02   1.9911356e-02   2.0055551e-02   2.0687339e-02   2.0389416e-02   2.1164816e-02   2.2202477e-02   2.2429968e-02   2.3129515e-02   2.3489857e-02   2.4097922e-02   2.5115507e-02   2.6622923e-02   2.8437775e-02   3.0754683e-02   3.4953214e-02   4.0412508e-02   4.5434237e-02   5.0182377e-02   5.4673654e-02   5.8132117e-02   6.0946805e-02   6.3294687e-02   6.4043058e-02   6.2535921e-02   5.8787085e-02   5.3916525e-02   4.8895926e-02   4.4290364e-02   4.0693746e-02   3.7489657e-02   3.2781034e-02   2.9501666e-02   2.6049804e-02   2.2500864e-02   2.0840875e-02   2.0227234e-02   1.8254872e-02   1.7226212e-02   1.5870889e-02   1.2919982e-02   1.1018893e-02   8.6156392e-03   7.0478399e-03   6.7591869e-03   6.1386082e-03   5.2565606e-03   6.2957796e-03   4.9658504e-03   2.9799122e-03   1.5598371e-03   9.5879890e-05  -1.8627527e-03  -1.9984378e-03  -1.5467622e-03  -6.3755300e-04  -4.3073086e-04  -1.8962952e-03  -3.6886306e-03  -5.9741985e-03  -7.7977487e-03  -1.1320259e-02  -1.2816840e-02  -1.3550675e-02  -1.2983201e-02  -1.3122287e-02  -1.1463599e-02  -1.0917523e-02  -1.0989411e-02  -1.1579009e-02  -1.1862997e-02  -1.2116270e-02  -1.2326921e-02  -1.1771520e-02  -1.1780574e-02  -1.2044345e-02  -1.2294245e-02  -1.0576255e-02  -1.0622963e-02  -1.0467317e-02  -1.0399962e-02  -9.8339626e-03  -1.0572393e-02  -1.0759443e-02  -1.0923766e-02  -1.0849162e-02  -1.0634451e-02  -1.0265524e-02  -9.0527389e-03  -7.7771439e-03  -6.0219483e-03  -4.5281298e-03  -3.5103656e-03  -3.6087596e-03  -3.0911689e-03  -2.6659965e-03  -3.1326151e-03  -3.5387874e-03  -2.9806143e-03  -3.0630778e-03  -3.0188107e-03  -1.9385793e-03  -2.0026519e-03  -2.6633980e-03  -2.9973802e-03  -4.0159913e-03  -5.6574657e-03  -7.6177346e-03  -1.0073177e-02  -1.2360642e-02  -1.4453061e-02  -1.6894602e-02  -1.6878153e-02  -1.6399774e-02  -1.5998611e-02  -1.5804665e-02  -1.5132958e-02  -1.4781802e-02  -1.3248339e-02  -1.0917506e-02  -7.4898968e-03  -3.4581349e-03   3.9169060e-04   5.1278849e-03   9.9863025e-03   1.3695675e-02   1.8632316e-02   2.4894092e-02   2.9273064e-02   3.4381735e-02   4.0456307e-02   4.4693731e-02   4.8906168e-02   5.3837425e-02   5.6684263e-02   5.8015030e-02   6.0055437e-02   6.0121427e-02   5.9617250e-02   5.8539121e-02   5.6709693e-02   5.4453243e-02   5.1489453e-02   4.7046321e-02   4.4253439e-02   4.0243138e-02   3.6861917e-02   3.3145692e-02   3.1896125e-02   2.7872925e-02   2.5483854e-02   2.1869142e-02   1.8816787e-02   1.3502042e-02   9.3727372e-03   6.4418832e-03   4.1021883e-03   1.8352406e-03   1.3762019e-03   1.9014928e-03   1.6385899e-03   2.4255639e-03   4.4142770e-03   6.4611248e-03   1.0522289e-02   1.6358365e-02   2.0219583e-02   2.4311198e-02   2.8888084e-02   3.2914472e-02   3.7543499e-02   4.4353479e-02   5.1200344e-02   5.7880615e-02   6.4133378e-02   6.9399400e-02   7.3268838e-02   7.6278289e-02   7.8288460e-02   7.7969299e-02   7.7452994e-02   7.5281897e-02   7.0857835e-02   6.6097660e-02   6.1284978e-02   5.4894927e-02   4.9903943e-02   4.5168087e-02   4.0672487e-02   3.4822629e-02   3.0459658e-02   2.5552994e-02   2.0837544e-02   1.4683269e-02   9.9372937e-03   4.6204126e-03   5.0096735e-04  -2.4393705e-03  -5.0364779e-03  -7.8041908e-03  -1.0328375e-02  -1.3674782e-02  -1.7595645e-02  -2.0729467e-02  -2.2933832e-02  -2.4441701e-02  -2.5275788e-02  -2.6149387e-02  -2.5285188e-02  -2.4458464e-02  -2.3499853e-02  -2.2705612e-02  -1.9924981e-02  -1.7378656e-02  -1.3657450e-02  -1.0785370e-02  -7.3428822e-03  -3.7850621e-03  -8.9136858e-04   8.1120010e-04   2.5884031e-03   3.4596426e-03   2.9893672e-03   2.0118049e-03   8.1485551e-04  -8.2913649e-04  -2.0214437e-03  -2.2821109e-03  -4.3983358e-03  -4.0664581e-03  -4.6236033e-03  -5.5415475e-03  -6.1845101e-03  -4.7799329e-03  -4.6964682e-03  -3.9874843e-03  -2.9641538e-03  -2.3317864e-03  -1.2938656e-03  -1.4334631e-03  -7.3078295e-04   1.0410722e-03   1.7049638e-03   1.3987767e-03   2.3098143e-03   3.3506722e-03   3.1843964e-03   3.8725165e-03   5.7825660e-03   6.3260652e-03   7.7714973e-03   1.0362002e-02   1.2234485e-02   1.2238361e-02   1.2975127e-02   1.3643600e-02   1.2864359e-02   1.1354607e-02   1.0703644e-02   1.0496702e-02   9.2928077e-03   8.0547980e-03   6.9126882e-03   6.0034627e-03   4.1191701e-03   2.0256079e-03   1.3410710e-03   8.2711311e-04  -1.0530895e-04  -1.0712945e-03  -1.0120536e-03  -3.2399353e-03  -3.0453066e-03  -3.2723902e-03  -3.6258939e-03  -4.1367008e-03  -3.6846488e-03  -4.7758007e-03  -4.8088622e-03  -5.5709490e-03  -5.3966592e-03  -4.7752356e-03  -3.2953566e-03  -1.4915395e-03   3.4603708e-04   5.5324219e-04   1.8115060e-03   2.5093668e-03   2.4981290e-03   3.7915691e-03   5.0492032e-03   4.9521178e-03   5.3629648e-03   7.2689667e-03   8.1443771e-03   9.3734711e-03   1.0771630e-02   1.0886233e-02   9.3718919e-03   9.6406452e-03   9.1152284e-03   9.6751406e-03   1.1219159e-02   1.2462869e-02   1.3072162e-02   1.4401785e-02   1.4436617e-02   1.4783903e-02   1.5516998e-02   1.6864206e-02   1.6857248e-02   1.8071176e-02   1.8628831e-02   1.9458653e-02   1.9648517e-02   1.9670101e-02   1.8557308e-02   1.7660704e-02   1.7161918e-02   1.6677496e-02   1.6456712e-02   1.6302016e-02   1.6335563e-02   1.6512644e-02   1.6105913e-02   1.5828221e-02   1.5762129e-02   1.5107850e-02   1.4293229e-02   1.3405036e-02   1.3200871e-02   1.4291324e-02   1.2863905e-02   1.2005818e-02   1.1741245e-02   1.1144064e-02   8.8295211e-03   9.9176963e-03   8.1298644e-03   7.1298482e-03   6.6498623e-03   5.7766088e-03   4.1449814e-03   4.7689398e-03   4.1678877e-03   3.5961669e-03   5.0696346e-03   7.4402578e-03   9.6504289e-03   1.1762282e-02   1.3635292e-02   1.5163834e-02   1.6554822e-02   1.7816499e-02   1.9835259e-02   2.2083739e-02   2.3254223e-02   2.3720781e-02   2.3388906e-02   2.2721913e-02   2.0999297e-02   2.0471030e-02   1.8640671e-02   1.7332262e-02   1.5504344e-02   1.3383937e-02   9.9550060e-03   6.7944598e-03   4.9796774e-03   1.9315044e-03   6.3841293e-04  -6.0425327e-04  -1.1011001e-03  -2.6819729e-03  -3.1472372e-03  -3.5746335e-03  -4.2779756e-03  -5.3006263e-03  -6.1124729e-03  -6.9606376e-03  -9.1852629e-03  -1.0466681e-02  -1.1701680e-02  -1.3089675e-02  -1.3398823e-02  -1.3377840e-02  -1.3973442e-02  -1.5007895e-02  -1.5362733e-02  -1.5441349e-02  -1.6901126e-02  -1.7701127e-02  -1.7047568e-02  -1.6617154e-02  -1.6797956e-02  -1.5445876e-02  -1.4504466e-02  -1.5164572e-02  -1.5955978e-02  -1.6098454e-02  -1.5333575e-02  -1.4649598e-02  -1.2982205e-02  -1.1641050e-02  -1.0970096e-02  -1.0503341e-02  -9.4190094e-03  -8.2318267e-03  -8.0354399e-03  -7.6320014e-03  -8.2918656e-03  -1.0215561e-02  -1.1595266e-02  -1.2201943e-02  -1.3329939e-02  -1.3684159e-02  -1.3140861e-02  -1.2194778e-02  -9.2517081e-03  -3.4236953e-03   5.7716083e-03   1.9947860e-02   4.0134057e-02   6.8316605e-02   1.0592881e-01   1.5184776e-01   2.0343337e-01   2.5513160e-01   2.9747446e-01   3.2320276e-01   3.2834145e-01   3.1048435e-01   2.7332122e-01   2.2532562e-01   1.7502115e-01   1.2859181e-01   9.0812350e-02   6.3136916e-02   4.5202305e-02   3.2709929e-02   2.4790551e-02   2.0056882e-02   1.5788079e-02   1.1607889e-02   6.9900547e-03   2.0663137e-03  -3.2974263e-03  -8.3275328e-03  -1.2349559e-02  -1.5005539e-02  -1.8447594e-02  -2.1840033e-02  -2.4346045e-02  -2.8259338e-02  -3.0947167e-02  -3.2190711e-02  -3.2670801e-02  -3.2301418e-02  -3.0835267e-02  -3.0779112e-02  -3.0946920e-02  -3.1014011e-02  -3.0419080e-02  -2.9307084e-02  -2.7453089e-02  -2.4974976e-02  -2.0952485e-02  -1.6829708e-02  -1.2056680e-02  -5.3308888e-03   3.2920711e-03   1.1943213e-02   2.0090198e-02   2.8106584e-02   3.5583085e-02   4.0978338e-02   4.4861458e-02   4.6676976e-02   4.5938924e-02   4.1500459e-02   3.5806780e-02   2.8756507e-02   2.2501822e-02   1.7383920e-02   1.3600678e-02   1.0222243e-02   6.9405590e-03   3.8446362e-03   1.3122507e-03  -6.8733939e-04  -2.3661693e-03  -1.7703506e-03  -2.7404484e-03  -3.6878976e-03  -2.4130255e-03  -1.6954752e-03  -1.9264609e-03  -1.7054631e-04   1.0744999e-03   9.7533311e-04   1.7078955e-03   2.0209913e-03   2.5233716e-03   2.2239943e-03   2.1288984e-03   2.7409033e-03   2.4123757e-03   1.7803205e-03   2.7479876e-03   3.6254289e-03   3.7880471e-03   6.1748876e-03   7.9092002e-03   8.0943812e-03   7.3928797e-03   6.7433403e-03   4.7109778e-03   3.4590659e-03   3.4854762e-03   3.4447820e-03   3.1208105e-03   3.3267592e-03   2.9028650e-03   2.2888788e-03   3.4093001e-03   4.5323727e-03   3.8766254e-03   3.2661090e-03   4.2613441e-03   4.5241553e-03   3.5570757e-03   4.5458956e-03   5.4770238e-03   4.1179666e-03   2.2970994e-03   6.8728769e-04  -2.0207330e-03  -3.6547771e-03  -4.7613641e-03  -5.3912466e-03  -3.4390766e-03  -2.8007577e-03  -3.0368032e-03  -1.8366440e-03  -2.3145660e-04  -6.7308419e-04   1.2697485e-03   3.9438479e-03   6.1748698e-03   6.5721353e-03   6.8463828e-03   7.1907815e-03   5.4831524e-03   4.3680458e-03   4.3437286e-03   4.8574207e-03   7.6503615e-03   1.0523443e-02   1.3873026e-02   1.7259220e-02   1.8730009e-02   1.8119176e-02   1.8848632e-02   1.5923681e-02   1.2966195e-02   1.0056939e-02   7.3661468e-03   4.2113161e-03   3.2494136e-03   8.1011316e-04   7.1226769e-04   3.7350838e-04   7.3313989e-04   6.2469046e-04   1.0351072e-03   1.3732208e-03   4.1010984e-05  -1.0769743e-03  -1.6232626e-03  -8.2168572e-04  -1.7351381e-03  -1.8200074e-03  -2.4613401e-03  -3.1270817e-03  -3.8349375e-03  -3.0476759e-03  -1.6777952e-03   7.2798745e-04   1.8039305e-03   1.8763057e-03   3.3099463e-03   5.4968043e-03   5.7795040e-03   7.8001952e-03   1.0225525e-02   1.1589468e-02   1.1583392e-02   1.2961295e-02   1.3025869e-02   1.2114542e-02   1.0193246e-02   7.3131265e-03   4.4845498e-03   2.1020855e-03  -1.8559437e-04  -1.4829770e-03  -1.1507687e-03  -1.1614002e-03  -1.1971512e-03   2.0124736e-04   2.1809672e-03   2.5904088e-03   2.1977201e-03   1.3210522e-03  -1.1829172e-03  -3.3197290e-03  -3.6624347e-03  -3.2960793e-03  -1.6487994e-03   2.2456066e-03   6.2487513e-03   1.0112537e-02   1.4009248e-02   1.6827564e-02   1.9624145e-02   2.3780431e-02   2.8450793e-02   3.2640596e-02   3.7760809e-02   4.2945757e-02   4.5751801e-02   4.7844551e-02   5.1219043e-02   5.4247812e-02   5.5590310e-02   5.6559574e-02   5.7400346e-02   5.7205564e-02   5.6417350e-02   5.4635097e-02   5.0265645e-02   4.4871759e-02   3.9373916e-02   3.2156477e-02   2.5880513e-02   2.1475624e-02   1.5925798e-02   9.0367574e-03   2.9606029e-03  -3.8654454e-03  -1.0153889e-02  -1.4262329e-02  -1.7494920e-02  -1.9697936e-02  -1.9556790e-02  -1.9394869e-02  -1.9987575e-02  -2.0702542e-02  -2.1115084e-02  -2.1883236e-02  -2.2787893e-02  -2.2959674e-02  -2.2354855e-02  -2.1940469e-02  -2.1353122e-02  -2.0201529e-02  -1.8478671e-02  -1.5602974e-02  -1.2790495e-02  -1.1117849e-02  -8.3019418e-03  -5.8076485e-03  -3.6265878e-03  -1.2904266e-04   3.9339403e-03   8.3018647e-03   1.3757796e-02   1.8809235e-02   2.3470326e-02   2.9400981e-02   3.3926073e-02   3.7361165e-02   4.1209418e-02   4.4581317e-02   4.6128987e-02   4.6884892e-02   4.7120161e-02   4.5291245e-02   4.2485391e-02   3.9415419e-02   3.5537820e-02   3.0338680e-02   2.7106440e-02   2.2617133e-02   1.7150879e-02   1.3898636e-02   1.1170051e-02   7.0724243e-03   5.2991021e-03   5.5812403e-03   5.5360855e-03   5.3493489e-03   4.9106683e-03   4.6527874e-03   4.8566418e-03   5.3208749e-03   7.6490916e-03   1.1579763e-02   1.5212861e-02   1.9289743e-02   2.2736045e-02   2.5381679e-02   2.7302022e-02   2.8491046e-02   2.7258578e-02   2.6605063e-02   2.6154630e-02   2.4560815e-02   2.2201564e-02   2.0156181e-02   1.6451362e-02   1.3667681e-02   1.1622953e-02   9.6993237e-03   8.6004281e-03   7.1218083e-03   3.9916527e-03   1.5514297e-03   5.1122137e-04  -3.2426549e-04  -9.6881107e-04  -1.2567554e-03  -2.9360850e-03  -3.7631625e-03  -7.4303769e-03  -9.9201364e-03  -1.2737070e-02  -1.3983885e-02  -1.6509894e-02  -1.7253065e-02  -1.5553642e-02  -1.3469813e-02  -1.2441806e-02  -9.2093085e-03  -6.9061969e-03  -7.9920442e-03  -8.4110215e-03  -7.4624431e-03  -6.7241897e-03  -7.4165788e-03  -6.0573775e-03  -5.2861043e-03  -1.9913041e-03  -1.9091207e-03  -5.6742434e-04   2.4448395e-03   5.5610287e-03   8.5570033e-03   1.2579690e-02   1.6924799e-02   2.0252697e-02   2.4440558e-02   2.8346226e-02   3.2345720e-02   3.7549225e-02   4.1595545e-02   4.4666809e-02   4.3953885e-02   4.1832320e-02   4.0766864e-02   4.0000488e-02   3.8473742e-02   3.6086045e-02   3.4614169e-02   3.2936702e-02   2.8839769e-02   2.4184127e-02   2.0145568e-02   1.5410069e-02   9.8857899e-03   4.1214386e-03  -2.4229558e-04  -3.2367394e-03  -4.8794954e-03  -7.3524431e-03  -9.2620730e-03  -1.0581132e-02  -1.0966799e-02  -1.2251484e-02  -1.2451535e-02  -1.1615736e-02  -1.2644682e-02  -1.3906995e-02  -1.2931569e-02  -1.0580300e-02  -9.6948145e-03  -7.6118113e-03  -4.3763600e-03  -1.7167314e-03  -2.4381146e-03  -1.9861903e-03  -1.1551472e-03   1.4256926e-05  -1.3220188e-03  -5.6829031e-04   4.5937003e-04   2.7300519e-03   3.3683464e-03   5.8754028e-03   5.1095194e-03   6.5667225e-03   8.4509690e-03   5.1134304e-03   3.3870115e-03   6.4865046e-03   7.7102106e-03   5.3735848e-03   9.9410707e-03   1.2003805e-02   1.3263655e-02   1.4098966e-02   1.7137391e-02   1.7189921e-02   1.7494919e-02   1.6535144e-02   1.7881728e-02   1.8905745e-02   1.8475688e-02   1.8994415e-02   2.1768102e-02   2.1354055e-02   1.9365068e-02   1.9668550e-02   1.9316549e-02   1.6627364e-02   1.4488492e-02   1.5423798e-02   1.5296681e-02   1.4561662e-02   1.3611571e-02   1.4879780e-02   1.4493449e-02   1.4364907e-02   1.3881063e-02   1.4011173e-02   1.1960926e-02   9.4699749e-03   7.0265271e-03   7.0632270e-03   7.0613594e-03   7.6828439e-03   9.3740374e-03   1.3669057e-02   1.3109706e-02   1.3854257e-02   1.4503083e-02   1.4756726e-02   1.2700623e-02   1.3120837e-02   1.1190599e-02   1.0391592e-02   8.4518997e-03   8.4090937e-03   8.9086201e-03   9.0083576e-03   7.4348405e-03   7.8339568e-03   7.0003422e-03   7.8885614e-03   8.6334433e-03   1.1162078e-02   1.2526481e-02   1.2877748e-02   1.2223133e-02   1.3280124e-02   1.5195968e-02   1.7392250e-02   1.8709800e-02   2.1169229e-02   2.2057902e-02   1.9292673e-02   1.5664987e-02   1.4743808e-02   1.2520656e-02   1.0434763e-02   8.0379754e-03   8.2027068e-03   5.3003241e-03   2.1148996e-03  -7.0346873e-04  -1.9145315e-03  -4.7972101e-03  -5.4700929e-03  -7.7009726e-03  -7.3619805e-03  -7.9213663e-03  -8.2526584e-03  -9.3482518e-03  -1.0161083e-02  -1.0958540e-02  -1.0927189e-02  -1.2717529e-02  -1.4561943e-02  -1.4528654e-02  -1.5370507e-02  -1.6019278e-02  -1.5788426e-02  -1.3666551e-02  -1.0340072e-02  -8.8505149e-03  -7.5160200e-03  -5.1488954e-03  -5.5388897e-03  -5.8669348e-03  -5.4556775e-03  -5.1283177e-03  -5.4375819e-03  -5.0161931e-03  -3.8259504e-03   2.7072116e-04   1.9573413e-03   4.6427649e-03   3.9710645e-03   3.2078426e-03  -4.0230300e-04  -6.1432464e-04  -2.8566998e-03  -5.1961699e-04   1.4789031e-03   1.5771217e-03   1.6263985e-03   1.8811353e-03   2.1380724e-03   1.7522868e-03   3.6589864e-03   3.8926026e-03   4.3615282e-03   4.8904208e-03   4.2045894e-03   2.9259352e-03   4.6248980e-03   7.5733461e-03   8.8014188e-03   1.1304146e-02   1.4424364e-02   1.5847810e-02   1.4680484e-02   1.4156224e-02   1.4656997e-02   1.5489528e-02   1.6108006e-02   1.9587582e-02   2.2378465e-02   2.1719874e-02   2.1591701e-02   1.9376531e-02   1.8078221e-02   1.8244242e-02   1.8286424e-02   1.7258331e-02   1.8255898e-02   1.7556957e-02   1.6771078e-02   1.6104882e-02   1.4570404e-02   1.4304816e-02   1.3200314e-02   1.2461324e-02   1.3620976e-02   1.4903123e-02   1.4180875e-02   1.4905283e-02   1.5954747e-02   1.4737071e-02   1.6749589e-02   1.8332258e-02   1.8032213e-02   1.6069527e-02   1.8021474e-02   1.9653433e-02   2.4351483e-02   2.7577478e-02   3.0217593e-02   3.1943137e-02   3.2860400e-02   3.3863101e-02   3.7666563e-02   4.1349604e-02   4.2128872e-02   4.1537475e-02   3.8955381e-02   3.6077158e-02   3.4420163e-02   3.5546292e-02   3.4868767e-02   3.4001980e-02   3.1204294e-02   2.7650660e-02   2.2548419e-02   2.3015860e-02   1.9973622e-02   1.9688969e-02   1.8164220e-02   1.6399366e-02   1.0510538e-02   1.0278495e-02   8.9387641e-03   9.0339738e-03   9.0764223e-03   9.6413543e-03   8.5078786e-03   7.7792749e-03   6.9811801e-03   6.3623188e-03   4.9880026e-03   2.8738096e-03   7.4711529e-05  -2.7099563e-03  -5.3849907e-03  -6.5502179e-03  -6.7188302e-03  -5.4398891e-03  -3.4352916e-03  -3.0379671e-03  -4.4859820e-03  -5.0736767e-03  -7.7076450e-03  -9.5391148e-03  -9.6099938e-03  -8.6593516e-03  -8.2260121e-03  -6.2202625e-03  -4.6308825e-03  -3.2911271e-03  -2.3763824e-03  -1.6567568e-03  -1.9219153e-03  -3.8952700e-03  -4.9705723e-03  -4.8433390e-03  -5.6665001e-03  -4.2077387e-03  -3.9294948e-03  -4.5839785e-03  -5.5023159e-03  -6.7566701e-03  -1.0226375e-02  -9.1850288e-03  -8.0709290e-03  -7.4295545e-03  -7.6381366e-03  -7.8247108e-03  -9.3547121e-03  -1.0341353e-02  -6.0393820e-03  -2.8921425e-03  -1.6348303e-03  -7.3589085e-04   2.1047718e-05  -4.5980337e-03  -4.6377985e-03  -3.2247559e-03  -1.1301824e-03  -2.6319458e-05   9.4603645e-04  -4.6163062e-04  -1.3728452e-03  -3.5618634e-03  -4.4721833e-03  -4.2061143e-03  -3.0922710e-03  -2.2536438e-03  -1.4492796e-03  -3.3479701e-04   4.3844477e-04   1.9327352e-03   3.4439392e-03   5.4254491e-03   6.9648839e-03   6.9120115e-03   4.9112294e-03   4.6991591e-03   5.2121528e-03   4.4208045e-03   5.6516726e-03   8.4258956e-03   9.1686354e-03   9.4260082e-03   1.0311239e-02   1.0122797e-02   9.6733329e-03   9.6672790e-03   9.8319618e-03   9.7315518e-03   9.6774851e-03   1.0018325e-02   1.0522479e-02   1.0529836e-02   9.9215486e-03   9.6885380e-03   7.9938495e-03   6.6774102e-03   6.4440533e-03   6.1870684e-03   4.5523238e-03   3.6096346e-03   2.3696483e-03   1.4552285e-04  -7.8213674e-04  -5.1307882e-04  -1.0085812e-03  -1.5735959e-03  -1.8742354e-03  -2.1802303e-03  -4.1047237e-03  -3.9008333e-03  -4.0979825e-03  -5.1392864e-03  -6.8425979e-03  -6.9799457e-03  -8.2858162e-03  -9.1706197e-03  -9.6150992e-03  -9.7733934e-03  -1.1007959e-02  -1.2421300e-02  -1.3968069e-02  -1.5144294e-02  -1.6700651e-02  -1.6854684e-02  -1.8081399e-02  -1.8850878e-02  -2.0012809e-02  -2.1374356e-02  -2.2663972e-02  -2.2110370e-02  -2.1463790e-02  -2.0895762e-02  -1.9333391e-02  -1.7785528e-02  -1.6242811e-02  -1.3490063e-02  -1.0277617e-02  -6.0525739e-03  -1.3006016e-03   3.7673682e-03   8.7046962e-03   1.4046245e-02   1.9728889e-02   2.5075160e-02   3.0300675e-02   3.5580967e-02   4.0330423e-02   4.4671901e-02   4.8737909e-02   5.1921573e-02   5.3843341e-02   5.5706855e-02   5.6449254e-02   5.7977693e-02   6.1028058e-02   6.4304425e-02   6.8478962e-02   7.3155755e-02   7.8623725e-02   8.1890599e-02   8.5689788e-02   8.9466703e-02   9.2993615e-02   9.4568979e-02   9.6635637e-02   9.7756810e-02   9.7186284e-02   9.5568796e-02   9.2139780e-02   8.8179320e-02   8.4007469e-02   8.0156657e-02   7.6633930e-02   7.3369719e-02   6.9870891e-02   6.5430581e-02   6.1367593e-02   5.7902395e-02   5.5925379e-02   5.5038380e-02   5.6010519e-02   5.7205576e-02   5.7914219e-02   5.8563561e-02   5.9193449e-02   5.8142058e-02   5.7436089e-02   5.6070959e-02   5.4878202e-02   5.2995159e-02   5.1483096e-02   4.8551343e-02   4.6012617e-02   4.2562745e-02   3.8830256e-02   3.4827415e-02   3.0992473e-02   2.6697584e-02   2.3008221e-02   1.8994443e-02   1.5617920e-02   1.2121785e-02   9.4354235e-03   5.4599560e-03   2.4171014e-03  -8.0004108e-04  -2.9573306e-03  -5.8661451e-03  -7.6720080e-03  -9.7241855e-03  -1.1663908e-02  -1.4116698e-02  -1.5981580e-02  -1.7978976e-02  -1.9623417e-02  -2.1410510e-02  -2.1642611e-02  -2.2151482e-02  -2.2457283e-02  -2.2252200e-02  -2.1691107e-02  -2.2139784e-02  -2.2048813e-02  -2.1730040e-02  -2.1822319e-02  -2.1590932e-02  -2.1327962e-02  -2.0783701e-02  -1.9880261e-02  -1.9281995e-02  -1.8790023e-02  -1.8068589e-02  -1.6665358e-02  -1.5852529e-02  -1.4121375e-02  -1.2325516e-02  -1.1130676e-02  -1.0547654e-02  -9.8505097e-03  -9.4822253e-03  -8.4034821e-03  -7.2205265e-03  -6.3970441e-03  -4.7933917e-03  -3.3780191e-03  -3.1192104e-03  -2.4206892e-03  -1.4229522e-03  -1.1782717e-03  -6.0684420e-04   2.4060165e-04   2.3834208e-04   8.8427194e-05   7.9946619e-04   1.0970429e-03   1.7512932e-03   2.7767810e-03   4.2399783e-03   4.8235853e-03   5.0058944e-03   5.4857679e-03   5.7150803e-03   5.7799763e-03   6.3129330e-03   7.0378763e-03   7.4618554e-03   8.3647419e-03   8.9809536e-03   9.5077605e-03   9.8780142e-03   1.0347516e-02   1.0765211e-02   1.1354801e-02   1.1184564e-02   1.1687891e-02   1.1848885e-02   1.2005980e-02   1.1940381e-02   1.2807943e-02   1.3526038e-02   1.3814567e-02   1.4088724e-02   1.4092616e-02   1.3537182e-02   1.3119708e-02   1.3046608e-02   1.2576892e-02   1.2280809e-02   1.2464692e-02   1.1650536e-02   1.0863518e-02   1.0675153e-02   1.1169672e-02   1.1266373e-02   1.1636791e-02   1.2057015e-02   1.1818588e-02   1.0789184e-02   9.8381410e-03   8.9615773e-03   8.0260774e-03   7.2029319e-03   6.6142593e-03   5.8963065e-03   5.2712103e-03   4.8870080e-03   4.4937002e-03   3.7432909e-03   3.5408887e-03   3.6875986e-03   2.8143958e-03   2.6662674e-03   2.4177309e-03   2.1160357e-03   1.5970608e-03   1.6400242e-03   9.0258589e-04   8.5787565e-04   8.7425391e-04   1.0717036e-03   1.0993032e-03   2.3159581e-03   3.2872785e-03   3.4930352e-03   4.0439914e-03   5.0625576e-03   5.6471302e-03   6.1022821e-03   6.8066703e-03   7.7561496e-03   9.1247793e-03   9.6339420e-03   1.0123196e-02   1.1106528e-02   1.1359833e-02   1.1026970e-02   1.0698901e-02   1.0613525e-02   1.0620363e-02   1.0529483e-02   1.0032782e-02   9.9656205e-03   9.6352035e-03   8.7739318e-03   7.3603779e-03   7.1180192e-03   6.6847060e-03   6.0781277e-03   5.1632411e-03   5.0469226e-03   4.0765790e-03   3.3570847e-03   2.5219412e-03   2.0415218e-03   1.1726765e-03   2.6717485e-04  -1.2930830e-03  -1.1797564e-03  -1.5637519e-03  -2.4471858e-03  -2.4915206e-03  -1.8180138e-03  -2.1031633e-03  -2.1342233e-03  -1.6138912e-03  -2.0388767e-03  -2.7884049e-03  -3.3681133e-03  -3.7083796e-03  -4.0423893e-03  -3.8749085e-03  -3.0145385e-03  -3.3860054e-03  -3.5602263e-03  -3.4460002e-03  -3.1039679e-03  -3.4260869e-03  -2.4778052e-03  -1.5713393e-03  -9.4606361e-04  -7.0155652e-05   2.2741999e-03   4.4985778e-03   5.2880006e-03   5.7465999e-03   5.7445690e-03   4.5837299e-03   3.9635746e-03   5.0252753e-03   5.8341355e-03   7.2865335e-03   8.3810881e-03   8.6060467e-03   8.1653763e-03   8.1236768e-03   6.6838674e-03   5.3755311e-03   3.6815138e-03   1.4049863e-03  -8.5579839e-04  -1.9006313e-03  -4.1472274e-03  -5.4273470e-03  -5.6346426e-03  -5.3726846e-03  -5.6794776e-03  -4.9939142e-03  -4.8532636e-03  -3.9720137e-03  -2.1945607e-03  -8.9066632e-04   4.6242822e-04   2.0263916e-03   2.9039122e-03   3.1542381e-03   4.2363301e-03   6.2680563e-03   8.8359429e-03   1.1448912e-02   1.3880305e-02   1.7404363e-02   2.0199250e-02   2.3227685e-02   2.5457765e-02   2.7522557e-02   2.7741010e-02   2.7653401e-02   2.5803726e-02   2.3786488e-02   2.1297901e-02   1.8358764e-02   1.5888002e-02   1.4685015e-02   1.3141987e-02   1.1898735e-02   1.1412676e-02   1.1142958e-02   1.0677668e-02   1.1326978e-02   1.2176966e-02   1.3058887e-02   1.3285446e-02   1.4444446e-02   1.4461686e-02   1.3610480e-02   1.2495033e-02   1.1279285e-02   8.7705381e-03   6.8606573e-03   4.6072848e-03   3.0906194e-03   9.1555147e-04  -1.0982961e-03  -2.3058114e-03  -2.9060358e-03  -4.8737124e-03  -5.9400818e-03  -6.6924757e-03  -8.5420140e-03  -9.9980157e-03  -1.0944709e-02  -1.1722121e-02  -1.2465458e-02  -1.2378999e-02  -1.2474076e-02  -1.2295253e-02  -1.1930757e-02  -1.2450032e-02  -1.2186083e-02  -1.1442030e-02  -1.1684182e-02  -1.1808525e-02  -1.1027310e-02  -1.1555227e-02  -1.2019366e-02  -1.1210114e-02  -1.0465462e-02  -1.0253111e-02  -9.6651974e-03  -9.7130645e-03  -9.0739970e-03  -8.0992563e-03  -7.2271688e-03  -6.5907697e-03  -4.7888920e-03  -3.0952776e-03  -1.3317688e-03   2.8092233e-04   2.6712843e-03   4.8188515e-03   6.6464139e-03   7.6500078e-03   9.8094706e-03   1.2027469e-02   1.4002800e-02   1.6416399e-02   1.9117246e-02   2.1236417e-02   2.3096287e-02   2.5503639e-02   2.7440997e-02   2.9701863e-02   3.1969445e-02   3.4151525e-02   3.6000275e-02   3.7800614e-02   3.9295493e-02   4.1840405e-02   4.3535683e-02   4.4069864e-02   4.4459776e-02   4.5167981e-02   4.3974212e-02   4.3008238e-02   4.2187200e-02   4.0678580e-02   3.8944708e-02   3.8484949e-02   3.7990375e-02   3.7255103e-02   3.6172160e-02   3.4709706e-02   3.2705365e-02   3.1069668e-02   3.0059277e-02   2.9244162e-02   2.8810339e-02   2.8421704e-02   2.7639878e-02   2.6663046e-02   2.6170243e-02   2.6328615e-02   2.5374320e-02   2.4822457e-02   2.4385543e-02   2.4168099e-02   2.2710319e-02   2.1637439e-02   2.0280927e-02   1.8383764e-02   1.6945395e-02   1.6177470e-02   1.4352216e-02   1.3403174e-02   1.3208550e-02   1.2311938e-02   1.0410145e-02   9.8542553e-03   8.5911321e-03   7.1194703e-03   6.0553746e-03   4.6957732e-03   4.4235972e-03   4.3210403e-03   4.1886349e-03   3.8758275e-03   4.4478319e-03   3.4601018e-03   2.5209013e-03   1.5915804e-03   8.8488370e-04  -4.7209566e-05  -2.9912980e-04  -3.6479050e-04  -5.7451868e-04  -1.2665917e-03  -1.5121131e-03  -1.9921351e-03  -2.7695305e-03  -2.9443513e-03  -3.4219370e-03  -4.0217029e-03  -4.0967545e-03  -4.3170978e-03  -4.8771740e-03  -4.8694530e-03  -5.2562448e-03  -5.7746469e-03  -6.0033901e-03  -6.3690635e-03  -7.1862447e-03  -7.5283561e-03  -7.7343105e-03  -8.1112274e-03  -8.4445194e-03  -8.4149800e-03  -8.0981197e-03  -8.0174985e-03  -7.8457980e-03  -7.7050898e-03  -7.1563759e-03  -6.7938871e-03  -6.8221998e-03  -6.2956844e-03  -6.1680254e-03  -6.3693180e-03  -6.4924930e-03  -6.3099005e-03  -6.2799649e-03  -5.5639639e-03  -4.9694168e-03  -4.6439836e-03  -4.1385749e-03  -4.0475525e-03  -3.4979708e-03  -3.4090831e-03  -3.0380276e-03  -2.4764441e-03  -2.1561701e-03  -2.1850924e-03  -1.5432069e-03  -1.4499694e-03  -1.3670211e-03  -8.5812508e-04  -5.2400457e-04  -1.9555751e-04   4.9561573e-04   9.5200683e-04   1.0212798e-03   9.2236480e-04   1.0691446e-03   9.6811436e-04   9.8683460e-04   1.4522003e-03   1.9027945e-03   2.3411944e-03   2.6495814e-03   3.2489315e-03   3.2290794e-03   3.3726402e-03   3.4262566e-03   3.6512816e-03   3.5458886e-03   3.8622701e-03   3.7304378e-03   3.5126180e-03   3.7310384e-03   3.7667981e-03   3.6389640e-03   3.9073340e-03   4.0533568e-03   4.0454624e-03   3.9882116e-03   4.0483624e-03   4.1867418e-03   4.0836543e-03   3.8836972e-03   3.9431935e-03   3.7999653e-03   4.0111270e-03   4.0763055e-03   3.8701529e-03   3.7340699e-03   3.7831444e-03   3.6553325e-03   3.5691926e-03   3.6341499e-03   3.8436749e-03   4.0389355e-03   4.0130686e-03   4.2334965e-03   4.4918678e-03   4.1184018e-03   3.8554259e-03   3.4210127e-03   3.2172519e-03   3.0565225e-03   3.0812140e-03   2.9228287e-03   3.0045479e-03   2.5692270e-03   2.4267032e-03   2.2913259e-03   2.0707029e-03   1.7375092e-03   1.9537199e-03   1.9778728e-03   1.9232423e-03   2.3050244e-03   2.4463146e-03   2.5135793e-03   2.4773204e-03   2.4496082e-03   2.0411524e-03   2.0260573e-03   1.9290392e-03   1.3598676e-03   1.2920688e-03   1.5348189e-03   1.6676108e-03   1.5216811e-03   1.6131583e-03   1.3699608e-03   7.2162125e-04   5.1919485e-04   3.0327175e-04   5.6375825e-04   6.2861206e-04   1.0057290e-03   1.0169658e-03   1.2613877e-03   1.2867632e-03   1.5024353e-03   1.5903668e-03   1.6886021e-03   1.6778739e-03   1.5927983e-03   1.6605505e-03   1.6092469e-03   1.5905386e-03   1.4197512e-03   1.4952441e-03   1.1556440e-03   1.3434546e-03   1.5959031e-03   1.6637244e-03   1.9499348e-03   2.2498257e-03   1.9962980e-03   2.0537629e-03   2.2887144e-03   2.0079232e-03   2.0989224e-03   2.2836900e-03   1.9418548e-03   1.8200997e-03   1.9165518e-03   1.5747995e-03   1.2656567e-03   1.0959552e-03   9.1702014e-04   5.3658048e-04   5.8170558e-04   7.7267945e-04   8.1342317e-04   5.2882874e-04   7.0867922e-04   8.6371421e-04   7.1821111e-04   5.8595209e-04   7.3743647e-04   3.6374516e-04  -4.2381411e-05  -5.2256509e-04  -6.0758027e-04  -4.4090742e-04  -2.1268012e-04  -2.7076436e-04  -1.7697766e-04  -5.8324506e-04  -6.5543908e-04  -6.7104400e-04  -4.0855206e-04   3.4132658e-04
  -1.3292312e-02  -8.8581320e-03  -9.5220164e-03  -5.4235820e-03  -4.2594596e-03  -3.7601790e-03  -1.8973741e-03  -2.8238703e-04  -9.7586887e-04   5.5966880e-04   1.1803971e-03   1.7644808e-03   2.0381191e-03   1.6376450e-03   1.7570645e-03   3.4980814e-03   4.9637929e-03   6.2355022e-03   7.8481095e-03   8.6974955e-03   9.7120549e-03   1.0388880e-02   1.0853836e-02   1.0854622e-02   1.0544074e-02   9.4119946e-03   9.8648503e-03   1.2560857e-02   1.2936633e-02   1.4834243e-02   1.7246691e-02   1.8630073e-02   1.7613116e-02   1.6633294e-02   1.5291462e-02   1.3399377e-02   1.2566080e-02   1.1925269e-02   1.3929174e-02   1.5683116e-02   1.7508607e-02   1.7242458e-02   1.7059335e-02   1.6441422e-02   1.4559816e-02   1.3417110e-02   1.2547675e-02   1.0503383e-02   8.2991751e-03   7.4264177e-03   6.3683984e-03   5.2601258e-03   5.9185904e-03   6.1423289e-03   5.1085629e-03   3.7015920e-03   2.5693911e-03  -1.9590367e-04  -3.8849345e-04  -4.2823507e-05  -1.1249859e-03  -1.8112108e-03  -9.9643031e-04  -2.3577149e-03  -4.0692761e-03  -3.8876032e-03  -3.9162096e-03  -2.8560020e-03  -2.0740577e-03  -1.1643682e-03  -3.0944552e-04   7.0536292e-04   2.3878650e-04   1.6913020e-03   4.0464394e-03   4.8323269e-03   6.6635721e-03   8.7406549e-03   8.3759440e-03   7.6935883e-03   9.6209120e-03   1.0931093e-02   1.1782721e-02   1.5686317e-02   1.8753207e-02   2.0346609e-02   2.1834695e-02   2.3254292e-02   2.2374102e-02   2.2054964e-02   2.1640774e-02   2.1030349e-02   2.0900756e-02   2.0353372e-02   1.9457594e-02   1.8208535e-02   1.6763622e-02   1.5376768e-02   1.4710441e-02   1.3836120e-02   1.3404288e-02   1.2058099e-02   1.0166832e-02   8.4219687e-03   6.6561416e-03   4.0116978e-03   1.8280560e-03  -8.6366072e-04  -3.5182026e-03  -4.9616976e-03  -6.1027666e-03  -7.4499704e-03  -7.6127146e-03  -7.9465892e-03  -9.8601516e-03  -1.0504702e-02  -9.0090393e-03  -9.8604527e-03  -1.0816407e-02  -1.0257526e-02  -1.0921350e-02  -1.3489834e-02  -1.3714589e-02  -1.3267681e-02  -1.4209572e-02  -1.4898856e-02  -1.3658245e-02  -1.3172910e-02  -1.3567324e-02  -1.4357966e-02  -1.5295359e-02  -1.6815975e-02  -1.8019056e-02  -1.8607224e-02  -1.6801850e-02  -1.5967028e-02  -1.5510163e-02  -1.3534641e-02  -1.1258759e-02  -1.0466408e-02  -7.7124479e-03  -3.7452914e-03  -1.7104040e-03   7.7480964e-04   3.4633937e-03   5.8465192e-03   6.8681434e-03   8.5764713e-03   9.0541538e-03   8.4059284e-03   6.2547627e-03   4.3625716e-03   2.7664830e-03   3.2825475e-03   3.5012528e-03   5.5377132e-03   8.8632456e-03   1.1634441e-02   1.1948637e-02   1.4719535e-02   1.7185362e-02   1.7695728e-02   1.8905775e-02   2.2288248e-02   2.4658643e-02   2.7167033e-02   3.1902287e-02   3.5883630e-02   3.6595231e-02   3.9984857e-02   4.2620157e-02   4.3897933e-02   4.5730337e-02   4.8716157e-02   4.9780831e-02   5.2619415e-02   5.2732616e-02   5.3120969e-02   5.3984803e-02   5.2800440e-02   4.9366635e-02   4.7469289e-02   4.3845242e-02   4.0212446e-02   3.8572019e-02   3.5885696e-02   3.4237796e-02   3.3432743e-02   3.2633130e-02   2.9217015e-02   2.7425196e-02   2.4555094e-02   2.2668288e-02   2.2689245e-02   2.1933583e-02   2.2165571e-02   2.1039505e-02   2.0283413e-02   1.7151758e-02   1.5534545e-02   1.3218481e-02   1.3366404e-02   1.2183063e-02   1.1374177e-02   1.1564927e-02   1.0089831e-02   8.7088933e-03   6.7508695e-03   4.8073223e-03   2.8252076e-03   2.1149647e-03   5.5315600e-04  -7.7935422e-04  -2.6278904e-03  -4.8921143e-03  -4.7407819e-03  -5.4314003e-03  -4.5819259e-03  -3.6847691e-03  -3.4636126e-03  -5.2471018e-03  -5.4473663e-03  -6.7603633e-03  -5.4906889e-03  -5.4188417e-03  -4.2113389e-03  -3.0074384e-03  -2.2504982e-03  -3.9366066e-03  -2.9913070e-03  -2.7287903e-03  -2.0874719e-03  -4.2488254e-04   8.1486321e-04   2.3458466e-03   3.5623310e-03   3.2934514e-03   2.4573906e-03   2.1420259e-03   9.2791744e-04   2.2883675e-04  -2.6750917e-04  -1.5246515e-03  -1.5870920e-03  -1.4391807e-03  -1.3796683e-03  -4.1193806e-04   7.5827982e-04  -1.6038374e-05  -4.9769373e-04  -6.4571619e-04  -2.3734280e-03  -3.8948825e-03  -4.4518646e-03  -5.0809281e-03  -5.2817109e-03  -5.0074009e-03  -4.3145056e-03  -2.0643493e-03   4.0446089e-05   1.1004877e-03   3.3138149e-03   5.0217645e-03   5.6409522e-03   8.4388233e-03   1.0668862e-02   1.2011564e-02   1.3682669e-02   1.4153703e-02   1.2303153e-02   1.0335263e-02   1.0042174e-02   8.9522415e-03   9.8148220e-03   9.6539712e-03   1.0949071e-02   1.1108642e-02   1.1848715e-02   1.2613635e-02   1.4202747e-02   1.4267069e-02   1.1973043e-02   1.2029584e-02   1.1036768e-02   1.0027161e-02   9.5277099e-03   1.1806003e-02   1.2349997e-02   1.2037282e-02   1.1297467e-02   1.1126646e-02   9.3011964e-03   6.8960231e-03   4.0316603e-03   3.0152477e-03   1.6176297e-03   7.5016955e-04  -6.2245865e-04  -1.5786820e-03  -2.5133528e-03  -1.6791582e-03  -1.3925255e-03   4.0440675e-04   1.9259026e-03   3.1348936e-03   2.0243022e-03   1.6989266e-03   6.7931810e-04   1.0525636e-04  -1.3738274e-03  -2.6985045e-03  -4.0017974e-03  -4.4321067e-03  -5.4415317e-03  -6.1127740e-03  -6.7667395e-03  -6.4623712e-03  -6.1720898e-03  -4.8771341e-03  -4.2219175e-03  -4.5877139e-03  -2.9407571e-03  -2.6746115e-03  -3.7674468e-03  -4.7926013e-03  -3.9152110e-03  -6.3558693e-03  -9.3011555e-03  -1.0569133e-02  -1.0531838e-02  -1.0490594e-02  -9.7768100e-03  -8.2349859e-03  -5.5582822e-03  -4.2203577e-03  -3.0924570e-03  -1.4725419e-03  -3.1501529e-04  -1.2894089e-03  -1.3619752e-03  -1.3689962e-03  -2.1037999e-03  -2.8241336e-03  -1.6870599e-03  -8.1281728e-04  -1.6146109e-03  -2.2662013e-03  -1.8089007e-03  -3.0407186e-03  -5.2026380e-03  -5.7138174e-03  -5.8260164e-03  -6.6306213e-03  -6.0261222e-03  -4.9241574e-03  -2.6842350e-03   7.4965483e-05   5.1377596e-03   1.1335927e-02   1.9668362e-02   2.9460339e-02   4.2437199e-02   5.6751478e-02   7.1784164e-02   8.6631704e-02   9.7031428e-02   1.0183873e-01   9.9749856e-02   9.0927305e-02   7.6430587e-02   5.9683781e-02   4.2177339e-02   2.6654432e-02   1.3391082e-02   5.5115711e-03  -5.0426541e-04  -6.1495823e-03  -9.6859678e-03  -1.1416249e-02  -1.5199967e-02  -1.7791498e-02  -1.8370774e-02  -1.9332805e-02  -2.0269408e-02  -2.0461657e-02  -2.0560645e-02  -2.0204671e-02  -1.9562967e-02  -1.8534077e-02  -1.6642871e-02  -1.3493814e-02  -1.0574480e-02  -6.4545511e-03   4.9043205e-04   8.3511627e-03   1.7542643e-02   2.9350384e-02   4.2192984e-02   5.4520236e-02   6.6717251e-02   7.7189188e-02   8.5172224e-02   8.8524649e-02   8.5054785e-02   7.6467557e-02   6.5619531e-02   5.2272636e-02   3.8000433e-02   2.6614148e-02   1.6473154e-02   1.0581646e-02   6.3017579e-03   4.5638848e-03   4.0261577e-03   5.4973516e-03   4.5030282e-03   4.3911295e-03   4.7848964e-03   3.7391433e-03   3.8843626e-03   3.3207204e-03   3.6960209e-03   4.6641822e-03   6.4929486e-03   6.4321795e-03   7.3954887e-03   7.5343452e-03   6.3629575e-03   5.4506857e-03   6.2920448e-03   6.8448081e-03   6.5924424e-03   7.8111044e-03   9.3657894e-03   9.4323646e-03   9.7693111e-03   1.0594079e-02   9.6162851e-03   7.9149017e-03   7.2620815e-03   7.1678107e-03   7.8694462e-03   9.6083850e-03   1.0003941e-02   1.0037204e-02   9.4730057e-03   6.9476434e-03   5.6492670e-03   6.2690326e-03   6.3605894e-03   6.0280778e-03   5.6728575e-03   4.1584467e-03   2.6293286e-03   1.7149350e-03  -2.8219350e-04   3.1313619e-04  -9.7909593e-05  -6.0636689e-04  -8.6582078e-04  -7.8073593e-04  -2.9699329e-03  -3.3936631e-03  -2.6707514e-03  -2.8222479e-03  -1.5991235e-03  -1.0223654e-03  -1.5287643e-03  -2.6699635e-03  -4.1829587e-03  -6.5927178e-03  -6.7902875e-03  -6.6576522e-03  -7.1832621e-03  -7.3238250e-03  -7.3932373e-03  -8.7726661e-03  -1.0864795e-02  -1.1380247e-02  -1.2399811e-02  -1.1177444e-02  -9.7277961e-03  -7.6814783e-03  -5.5628159e-03  -2.5553114e-03  -1.1442281e-03   1.0608789e-03   3.5740072e-03   6.1241878e-03   9.9816449e-03   1.3036801e-02   1.6677886e-02   1.9417510e-02   2.0594947e-02   1.9911731e-02   2.1486406e-02   2.1140866e-02   2.0966769e-02   2.0507434e-02   1.9677827e-02   1.7068218e-02   1.5379695e-02   1.3275639e-02   1.0784044e-02   8.8260367e-03   8.3352001e-03   5.5757608e-03   3.9781447e-03   2.4938732e-03   5.4725436e-04  -2.6001449e-03  -3.2081522e-03  -4.1755506e-03  -3.4786204e-03  -8.1725375e-04   7.2402458e-04   1.8894274e-03   1.7357495e-03   3.7030332e-03   3.5170229e-03   4.3432029e-03   5.1205594e-03   7.6412948e-03   7.2732639e-03   7.9617396e-03   7.8114010e-03   6.4869768e-03   4.8461627e-03   3.9139145e-03   2.0838785e-03   1.4308012e-03   7.9765810e-04   1.0087386e-03  -6.4256574e-04  -1.5794711e-03  -2.4260479e-03  -2.6075600e-03  -4.2446491e-03  -4.9398168e-03  -5.8913165e-03  -7.6833018e-03  -8.6183371e-03  -8.9111530e-03  -9.8946791e-03  -9.8077286e-03  -8.9739186e-03  -9.4691515e-03  -1.0032487e-02  -9.2044421e-03  -7.9850652e-03  -7.5320494e-03  -6.3143739e-03  -4.4351409e-03  -2.5569562e-03  -1.5206868e-03   4.8937516e-04   2.1958438e-03   3.5513146e-03   5.8542100e-03   6.3797330e-03   6.2975461e-03   7.6156759e-03   8.4756841e-03   9.1192979e-03   1.2004916e-02   1.5067861e-02   1.7233214e-02   1.9225238e-02   1.9977344e-02   1.9791794e-02   1.9698163e-02   1.9988414e-02   2.1968798e-02   2.4425890e-02   2.4574452e-02   2.5117320e-02   2.4900882e-02   2.3522914e-02   2.2298644e-02   2.4122874e-02   2.5164396e-02   2.6184581e-02   2.7038116e-02   2.8149038e-02   2.9393361e-02   3.2498026e-02   3.6441486e-02   4.2346335e-02   4.8088108e-02   5.4824243e-02   5.9741619e-02   6.5704041e-02   6.9014075e-02   7.0965806e-02   7.0869239e-02   7.0197913e-02   6.6798162e-02   6.1895690e-02   5.6613888e-02   5.0300730e-02   4.3832374e-02   3.7632751e-02   3.3233841e-02   2.8718922e-02   2.6154711e-02   2.1366232e-02   1.7177877e-02   1.3921678e-02   1.1893524e-02   9.1648214e-03   9.0754955e-03   9.1937495e-03   8.1995699e-03   6.1048785e-03   4.2415915e-03   1.5526308e-03  -5.3898756e-04  -1.8684733e-03  -2.6835228e-03  -3.5273989e-03  -3.0689556e-03  -2.4846927e-03  -2.5917180e-03  -1.8599459e-03  -1.9590579e-03  -2.3647239e-03  -3.1347343e-03  -4.9637225e-03  -7.1640721e-03  -8.2024588e-03  -8.6048086e-03  -9.0190678e-03  -9.0168744e-03  -7.9221732e-03  -7.7653380e-03  -8.1313138e-03  -7.7547658e-03  -7.0821614e-03  -7.8903123e-03  -8.1373089e-03  -9.4733882e-03  -1.1650410e-02  -1.1925574e-02  -1.2086597e-02  -1.2365578e-02  -1.1135412e-02  -1.1144963e-02  -1.1965436e-02  -1.2484487e-02  -1.1980705e-02  -1.2998771e-02  -1.3150602e-02  -1.2744522e-02  -1.1316675e-02  -1.1038949e-02  -9.8832497e-03  -9.0365576e-03  -9.2341013e-03  -9.6206815e-03  -9.2563395e-03  -8.7345792e-03  -7.7151215e-03  -6.2488929e-03  -5.3580405e-03  -6.2384167e-03  -6.6162644e-03  -6.2191445e-03  -6.7602268e-03  -6.6457962e-03  -5.2053890e-03  -4.1843115e-03  -3.9643822e-03  -2.6072102e-03  -2.2407844e-03  -2.6471875e-03  -3.6263126e-03  -4.5892546e-03  -6.2177857e-03  -8.9625835e-03  -1.0255346e-02  -1.1894368e-02  -1.2149845e-02  -1.3211298e-02  -1.3575276e-02  -1.4866899e-02  -1.4757470e-02  -1.5466373e-02  -1.5136149e-02  -1.4180959e-02  -1.3003975e-02  -1.1220755e-02  -9.2702640e-03  -6.5267903e-03  -2.4093575e-03   1.9055379e-03   7.3186296e-03   1.2664382e-02   1.8480326e-02   2.4687799e-02   3.2279463e-02   3.7085054e-02   4.2309126e-02   4.7160045e-02   5.1785499e-02   5.5773831e-02   5.9591465e-02   6.3305289e-02   6.6605544e-02   6.8075422e-02   6.8434135e-02   6.8925811e-02   6.7922692e-02   6.5467368e-02   6.1067183e-02   5.5869886e-02   5.0602211e-02   4.4736382e-02   3.8392135e-02   3.3448543e-02   2.9102559e-02   2.5344402e-02   2.2342442e-02   1.8331329e-02   1.5682749e-02   1.2942628e-02   9.9164361e-03   7.0584684e-03   5.4946619e-03   3.1807263e-03   1.8743842e-03   7.5575841e-04   3.6671915e-04   7.2009275e-04   1.1352497e-03   2.5325386e-03   5.3512298e-03   1.0740209e-02   1.6759003e-02   2.3284024e-02   2.7991483e-02   3.3955039e-02   3.9013423e-02   4.3772387e-02   5.0585429e-02   5.9823091e-02   6.7565224e-02   7.3087102e-02   7.9015124e-02   8.2554556e-02   8.3048215e-02   8.2247627e-02   7.9721002e-02   7.7075589e-02   7.4412837e-02   7.0583705e-02   6.6135361e-02   6.1766052e-02   5.6886201e-02   5.0404169e-02   4.4352254e-02   3.6713310e-02   3.0293142e-02   2.3730129e-02   1.7382650e-02   1.0245665e-02   6.4887034e-03   3.2678171e-03  -1.8220582e-03  -6.5008793e-03  -8.4102346e-03  -1.1322990e-02  -1.5771988e-02  -1.9456218e-02  -2.1588854e-02  -2.4047466e-02  -2.5647865e-02  -2.4927186e-02  -2.4007205e-02  -2.3461387e-02  -2.3183184e-02  -2.2522290e-02  -2.1766016e-02  -1.8654444e-02  -1.5988060e-02  -1.1770916e-02  -8.8895796e-03  -6.0466123e-03  -3.9506590e-03  -1.7575811e-03  -3.1112632e-04   1.2857875e-03   2.0705879e-03   2.4410670e-03   2.5554685e-03   1.7820394e-03   5.2265906e-04  -9.0797218e-04  -2.1300054e-03  -2.6835378e-03  -2.9759943e-03  -3.4765679e-03  -4.1336334e-03  -3.9411014e-03  -4.1405660e-03  -3.5885206e-03  -2.4983180e-03  -1.1902976e-03  -6.7885612e-04  -1.8714652e-04  -5.1602823e-04  -8.1460653e-04  -7.3906601e-04  -3.3715868e-04  -4.1934982e-04  -1.4500346e-03  -2.0335074e-03  -1.2975069e-03   7.0825990e-05   2.2645207e-03   5.5992879e-03   8.5749886e-03   1.0965870e-02   1.2158495e-02   1.3236041e-02   1.4190991e-02   1.5134320e-02   1.5449707e-02   1.4625466e-02   1.3736127e-02   1.2357531e-02   1.1499578e-02   9.0455818e-03   6.6687678e-03   4.8080962e-03   4.2902468e-03   2.8414818e-03   1.5218180e-03   1.6624688e-03   1.9473435e-03   7.0408175e-05  -1.9750869e-03  -3.4752412e-03  -6.4420435e-03  -8.8296971e-03  -9.6728870e-03  -9.9157757e-03  -8.9702213e-03  -8.2802651e-03  -7.3247465e-03  -6.3016836e-03  -5.4132551e-03  -6.0394154e-03  -5.1803009e-03  -4.9610113e-03  -5.1414929e-03  -4.1592451e-03  -1.7852277e-03  -2.7789415e-04   6.4730624e-04   2.9951441e-03   4.9084038e-03   6.3013521e-03   8.5187767e-03   1.0542580e-02   1.1274717e-02   1.1544166e-02   1.2803395e-02   1.4222280e-02   1.4087098e-02   1.3766630e-02   1.4427615e-02   1.3704171e-02   1.2661518e-02   1.4632272e-02   1.5087100e-02   1.6061801e-02   1.6511474e-02   1.6890607e-02   1.6462863e-02   1.8817897e-02   1.9244331e-02   2.0121629e-02   2.0985873e-02   2.0533934e-02   2.0079926e-02   1.9965780e-02   2.0449788e-02   2.1282205e-02   2.2386421e-02   2.2608074e-02   2.2423184e-02   2.1684741e-02   2.0570051e-02   1.9399915e-02   1.8522160e-02   1.8386265e-02   1.8440269e-02   1.7589085e-02   1.6548313e-02   1.6896397e-02   1.6858104e-02   1.4817420e-02   1.5045461e-02   1.4387190e-02   1.1556533e-02   9.1515766e-03   8.9434855e-03   7.6383142e-03   7.2275010e-03   8.1734318e-03   8.2083258e-03   7.6462715e-03   6.0705381e-03   5.8023099e-03   5.5475191e-03   5.0484814e-03   5.8568934e-03   7.8671034e-03   8.7811325e-03   1.0043349e-02   1.3407570e-02   1.5075349e-02   1.4971013e-02   1.6091601e-02   1.6303345e-02   1.5709326e-02   1.6178602e-02   1.8294952e-02   1.9963923e-02   2.1946396e-02   2.3357670e-02   2.3290465e-02   2.3118468e-02   2.0664314e-02   1.8062984e-02   1.5736941e-02   1.3366112e-02   1.2105129e-02   1.1119185e-02   8.8545130e-03   6.9770199e-03   5.3403674e-03   2.9507670e-03   2.5324883e-03   1.4190052e-03  -6.5785677e-04  -7.7200612e-04  -2.0912291e-03  -5.0211996e-03  -7.2448744e-03  -8.6704543e-03  -1.0657230e-02  -1.2001750e-02  -1.2465502e-02  -1.2901348e-02  -1.3637153e-02  -1.4261585e-02  -1.5122113e-02  -1.5561761e-02  -1.5415729e-02  -1.5869936e-02  -1.7300894e-02  -1.8339556e-02  -1.8790059e-02  -1.8901877e-02  -1.9138184e-02  -1.7871643e-02  -1.6863434e-02  -1.5909124e-02  -1.5177058e-02  -1.4905675e-02  -1.5275228e-02  -1.4346236e-02  -1.4934317e-02  -1.4085093e-02  -1.2343308e-02  -1.0890906e-02  -9.1173276e-03  -7.6195051e-03  -8.5078112e-03  -9.0673547e-03  -9.4060050e-03  -1.2597263e-02  -1.4639798e-02  -1.6195481e-02  -1.7267337e-02  -1.7706445e-02  -1.6221897e-02  -1.4097788e-02  -9.2688120e-03  -2.3181029e-03   7.5151719e-03   2.2697911e-02   4.4901286e-02   7.6240469e-02   1.1816021e-01   1.6981050e-01   2.2778551e-01   2.8425134e-01   3.2943929e-01   3.5616667e-01   3.5841082e-01   3.3623974e-01   2.9505217e-01   2.4270544e-01   1.8845002e-01   1.4048929e-01   1.0067462e-01   7.1308530e-02   5.1893517e-02   3.8310328e-02   2.8056040e-02   2.2225175e-02   1.7102190e-02   1.2159683e-02   7.5150308e-03   2.8125621e-03  -2.8369608e-03  -7.9120130e-03  -1.3667780e-02  -1.9337364e-02  -2.3326065e-02  -2.7452733e-02  -3.0938626e-02  -3.3319087e-02  -3.3610895e-02  -3.4987714e-02  -3.6007552e-02  -3.6893182e-02  -3.6468497e-02  -3.6358901e-02  -3.5530999e-02  -3.4511976e-02  -3.2546978e-02  -3.1412270e-02  -3.0649653e-02  -2.8534302e-02  -2.5004918e-02  -2.0283520e-02  -1.2837653e-02  -4.1233953e-03   5.1402588e-03   1.5146335e-02   2.4874512e-02   3.3738731e-02   4.2014354e-02   4.8344897e-02   5.2636364e-02   5.4367725e-02   5.2768746e-02   4.7639024e-02   4.2034193e-02   3.5320684e-02   2.8529498e-02   2.2153791e-02   1.6839375e-02   1.2776983e-02   9.0454224e-03   4.8867762e-03   2.4081528e-03   1.5886915e-03  -4.4736156e-04  -1.4187438e-03  -2.2415987e-03  -1.6768985e-03  -2.1550591e-03  -2.9666571e-03  -2.2559550e-03  -3.4179341e-04   7.7868460e-04   1.8401791e-03   4.0389326e-03   4.8855739e-03   5.8357878e-03   5.1311534e-03   5.7438705e-03   5.2183300e-03   4.6959541e-03   3.8435132e-03   3.9421036e-03   3.4959746e-03   5.0523561e-03   6.6921964e-03   7.5915305e-03   6.9019987e-03   7.2107476e-03   7.1593823e-03   5.0870125e-03   3.8492483e-03   4.1647049e-03   3.8283454e-03   3.2437166e-03   3.6574491e-03   4.1782713e-03   5.0326453e-03   5.8601748e-03   5.7208552e-03   6.1723261e-03   6.8950862e-03   5.5080357e-03   3.8863434e-03   4.0034923e-03   3.5553514e-03   2.5897559e-03   1.9300056e-03   1.1128094e-03  -1.2353243e-03  -1.9655214e-03  -3.7972703e-03  -4.9327256e-03  -5.2456579e-03  -5.5428002e-03  -5.9871222e-03  -5.4254436e-03  -3.1091690e-03  -4.9658153e-04   8.3893169e-04   2.2904363e-03   5.7009660e-03   6.0625490e-03   9.8118027e-03   1.1413604e-02   1.2709429e-02   1.1086115e-02   1.1805257e-02   7.3796958e-03   7.9816630e-03   6.9993456e-03   8.9782860e-03   9.9196182e-03   1.1279435e-02   1.1350724e-02   1.3093414e-02   1.2801694e-02   1.2546161e-02   1.1855029e-02   1.1776906e-02   9.5763381e-03   7.6218808e-03   6.5277027e-03   4.7900815e-03   3.4732367e-03   3.1951182e-03   2.7328244e-03   2.1253387e-03   3.0833328e-03   1.5423776e-03  -2.8070114e-04  -1.3396500e-03  -1.4202238e-03  -2.3336239e-03  -2.8507145e-03  -2.5312848e-03  -2.5790551e-03  -3.6744529e-03  -4.6793441e-03  -3.2605002e-03  -1.6802061e-03   9.4373827e-04   2.1826933e-03   4.0209119e-03   5.1282001e-03   6.0685588e-03   5.2543722e-03   6.1585705e-03   6.8919694e-03   6.1695793e-03   5.6296646e-03   6.7930347e-03   7.2884998e-03   6.4360355e-03   5.7440997e-03   5.3261686e-03   4.0002894e-03   2.4344978e-03   1.6747477e-03   8.3070982e-04   1.4182501e-05  -9.4316655e-04  -1.9591025e-03  -1.7564408e-03  -1.0464558e-03  -4.8506036e-04   1.0893189e-03   1.6326834e-03   8.8041395e-04   1.6432024e-03   1.9001068e-03   8.1460339e-04   2.3563561e-03   5.8264003e-03   7.6844379e-03   9.4275310e-03   1.2290066e-02   1.4164933e-02   1.6605071e-02   2.2096927e-02   2.8047169e-02   3.3668550e-02   3.9949415e-02   4.5238662e-02   4.8244573e-02   5.1721320e-02   5.6333704e-02   5.9267656e-02   6.1106689e-02   6.3258338e-02   6.4000575e-02   6.1826972e-02   5.9683663e-02   5.6639924e-02   5.1622424e-02   4.6348712e-02   4.0758600e-02   3.4064517e-02   2.7610247e-02   2.1568547e-02   1.5030200e-02   9.5981288e-03   4.2007026e-03  -1.8469145e-03  -7.7745442e-03  -1.3338106e-02  -1.7451508e-02  -1.9309518e-02  -2.0138281e-02  -2.0871429e-02  -2.1799548e-02  -2.2889862e-02  -2.4362820e-02  -2.5669921e-02  -2.5712313e-02  -2.4471112e-02  -2.3619628e-02  -2.2180038e-02  -2.0352810e-02  -2.0293637e-02  -1.9658396e-02  -1.7112797e-02  -1.5728324e-02  -1.5230125e-02  -1.2467027e-02  -9.1349510e-03  -6.2241328e-03  -1.7494503e-03   3.6556255e-03   9.6521728e-03   1.5333960e-02   2.0344409e-02   2.5843850e-02   3.1802211e-02   3.6952451e-02   4.1706458e-02   4.6216463e-02   4.9196521e-02   5.0555655e-02   5.1074225e-02   5.0456342e-02   4.7486584e-02   4.4223413e-02   4.1676801e-02   3.8147075e-02   3.3874267e-02   2.9807194e-02   2.5101474e-02   1.9865008e-02   1.5060646e-02   1.1118989e-02   7.2828649e-03   5.4760078e-03   4.7884805e-03   5.2331630e-03   5.7553297e-03   6.4510741e-03   6.9333517e-03   8.2999693e-03   9.4328641e-03   1.1634281e-02   1.4799662e-02   1.7921687e-02   2.1825940e-02   2.6361227e-02   2.9663406e-02   3.2545001e-02   3.5188699e-02   3.3810856e-02   3.0851474e-02   2.9969091e-02   2.7400214e-02   2.1665891e-02   1.7609184e-02   1.4997759e-02   1.1676869e-02   8.9776833e-03   8.5794821e-03   9.3022951e-03   7.9398828e-03   4.9931890e-03   3.9494084e-03   2.4367611e-03   1.1900680e-04  -1.4316488e-03  -2.5772785e-03  -4.7782288e-03  -5.1679677e-03  -7.0072234e-03  -8.5974832e-03  -1.2299895e-02  -1.3169574e-02  -1.6494460e-02  -1.7852625e-02  -1.7425532e-02  -1.4705288e-02  -1.3931918e-02  -1.1583772e-02  -9.8023984e-03  -1.0776013e-02  -1.0084033e-02  -1.0988720e-02  -1.0660489e-02  -1.0943506e-02  -1.0462099e-02  -8.8999570e-03  -4.3975676e-03  -2.3803253e-03   2.1911877e-05   6.2952886e-03   8.8761599e-03   1.1071614e-02   1.4813420e-02   1.8048007e-02   1.9863450e-02   2.3198886e-02   2.9105550e-02   3.2672447e-02   3.8999196e-02   4.9099376e-02   4.7025277e-02   5.1592184e-02   5.0933253e-02   4.8419800e-02   4.1706266e-02   4.5744152e-02   3.8072929e-02   3.5659905e-02   3.2535173e-02   2.7697657e-02   2.3278136e-02   1.8984829e-02   1.5012879e-02   1.1816154e-02   5.7886010e-03   3.8818660e-03   4.6119441e-03   2.2181948e-03  -2.2050613e-03  -4.7482729e-03  -1.0176896e-02  -1.6693925e-02  -1.7905003e-02  -1.6173873e-02  -1.3488379e-02  -1.2192845e-02  -1.0665592e-02  -9.2916339e-03  -9.0538532e-03  -9.3976906e-03  -8.6741959e-03  -5.2254414e-03  -2.4551905e-03  -1.9537727e-03  -1.7085832e-03  -2.1530864e-04  -3.0705945e-04  -1.5124012e-03  -1.6711515e-03   1.1422689e-03   3.2220277e-03   5.6905028e-03   7.7498697e-03   9.9637804e-03   8.0016814e-03   8.9897157e-03   5.0798120e-03   4.1723854e-03   3.6094033e-03   7.5314931e-03   6.3997956e-03   9.5797214e-03   1.1393454e-02   1.5805673e-02   1.6780119e-02   1.9552698e-02   2.1169446e-02   2.2418049e-02   2.1706194e-02   2.2136705e-02   2.3709273e-02   2.3168254e-02   2.2689283e-02   2.4066407e-02   2.4832760e-02   2.2433375e-02   2.1074453e-02   2.0018231e-02   1.6878193e-02   1.3235412e-02   1.3417732e-02   1.4298279e-02   1.3983045e-02   1.3680076e-02   1.5330462e-02   1.5605478e-02   1.4591123e-02   1.3031991e-02   1.4100599e-02   1.3628426e-02   1.1304704e-02   9.3595270e-03   8.9019948e-03   8.1291960e-03   9.5170419e-03   1.2278601e-02   1.6199566e-02   1.7951596e-02   1.7040249e-02   1.6504185e-02   1.7550309e-02   1.4984951e-02   1.2919639e-02   1.2452271e-02   1.0718526e-02   7.0427178e-03   8.3281137e-03   1.0346029e-02   1.0547158e-02   1.1000704e-02   1.2079102e-02   1.0914259e-02   1.0874250e-02   1.1257748e-02   1.1977022e-02   1.2370261e-02   1.2620522e-02   1.2978210e-02   1.3962410e-02   1.5907604e-02   1.7316487e-02   1.7721791e-02   1.9970818e-02   2.0919241e-02   1.8096813e-02   1.4956288e-02   1.4472580e-02   1.1900371e-02   9.0281121e-03   8.2316945e-03   9.5285508e-03   6.0693128e-03   2.5091528e-03   2.7621558e-04  -1.3329239e-03  -3.7837516e-03  -4.2946446e-03  -6.1353209e-03  -6.5193188e-03  -9.0926934e-03  -1.2289972e-02  -1.4659500e-02  -1.5066670e-02  -1.4503218e-02  -1.3898960e-02  -1.5415911e-02  -1.5903490e-02  -1.5823130e-02  -1.8339841e-02  -1.9833681e-02  -1.9253333e-02  -1.7803203e-02  -1.4911299e-02  -1.1428892e-02  -7.8144840e-03  -3.8815525e-03  -2.6482281e-03  -4.5554609e-03  -4.1721628e-03  -3.0355385e-03  -1.9027845e-03  -1.2213508e-04   2.2166755e-03   5.5920938e-03   5.3909280e-03   4.1531488e-03   2.0976834e-03   2.6095316e-03  -1.9708236e-03  -2.1323185e-03  -2.8036204e-03  -1.7229809e-03  -1.0377994e-03   1.0045957e-04   1.0911814e-03   4.2547337e-03   6.0694267e-03   4.7152918e-03   4.1280696e-03   1.7248482e-03  -7.7830139e-04   1.0293487e-04   3.1526818e-03   6.0782224e-03   9.8724316e-03   1.2331407e-02   1.1690770e-02   1.2647198e-02   1.5459146e-02   1.5556303e-02   1.7078252e-02   1.8869927e-02   1.9853180e-02   1.8622768e-02   2.1419852e-02   2.2880298e-02   2.5323960e-02   2.3917515e-02   2.3654977e-02   2.0218124e-02   1.7228025e-02   1.6082135e-02   1.7468832e-02   1.9500977e-02   2.2265775e-02   2.3134306e-02   2.1488438e-02   1.7993669e-02   1.2772544e-02   9.4758839e-03   8.8198517e-03   1.1020376e-02   1.6112016e-02   2.0982854e-02   2.2396601e-02   2.4397422e-02   2.4407490e-02   2.0367710e-02   1.8585899e-02   2.0943976e-02   1.7982996e-02   1.7313168e-02   2.1326059e-02   2.5908442e-02   2.8018635e-02   3.3275292e-02   3.6184698e-02   3.7382566e-02   3.6901408e-02   3.8159383e-02   3.9937839e-02   4.1845791e-02   4.1731609e-02   4.0937394e-02   3.8835183e-02   3.6472109e-02   3.4534143e-02   3.5788808e-02   3.7319816e-02   3.5190238e-02   3.3550390e-02   2.9193953e-02   2.2815786e-02   2.0529593e-02   1.8626914e-02   1.7056009e-02   1.5480603e-02   1.4581555e-02   9.5996626e-03   9.3825317e-03   8.5651004e-03   9.5074460e-03   9.7853151e-03   9.1353140e-03   7.0823862e-03   6.0637165e-03   4.8770823e-03   3.6004310e-03   3.6343669e-03   3.2907771e-03   2.1418606e-03  -1.0659325e-03  -2.9574562e-03  -4.5797676e-03  -5.3282212e-03  -5.9726959e-03  -4.1885333e-03  -3.0404276e-03  -3.2698618e-03  -5.2959662e-03  -7.0328506e-03  -8.5913684e-03  -9.5839389e-03  -9.1020789e-03  -7.5754760e-03  -6.0169103e-03  -3.2326430e-03  -2.1791123e-03  -2.1506806e-03  -2.4801113e-03  -3.4511570e-03  -5.8142050e-03  -6.8851585e-03  -6.4031451e-03  -5.9167790e-03  -4.8585545e-03  -5.0116360e-03  -4.4495276e-03  -5.9872394e-03  -6.4121558e-03  -8.5625865e-03  -8.6505009e-03  -9.2254841e-03  -8.9306300e-03  -9.6822745e-03  -9.4893801e-03  -9.4092498e-03  -1.0375932e-02  -1.0789453e-02  -1.0991846e-02  -1.1662145e-02  -1.1448941e-02  -9.9152934e-03  -8.8925023e-03  -7.4797759e-03  -2.7759746e-03   3.9457756e-05   4.9948915e-04   1.0862375e-03   1.1498531e-03  -8.2103769e-04  -2.5897581e-03  -2.5359330e-03  -1.0200822e-03   1.3497913e-03   2.0748116e-03   2.2158839e-03   2.9711260e-03   3.2195954e-03   3.2404858e-03   4.4624641e-03   6.4884431e-03   7.0163149e-03   7.2833684e-03   7.0799182e-03   6.6955691e-03   6.4458565e-03   6.3566839e-03   6.5257495e-03   7.6725933e-03   8.9013378e-03   9.6367764e-03   1.0782506e-02   1.1305684e-02   1.1445843e-02   1.1132476e-02   1.1739420e-02   1.1712173e-02   1.1096375e-02   1.0884930e-02   1.1152805e-02   9.8314611e-03   1.0038873e-02   9.8335514e-03   8.9159100e-03   7.7105612e-03   7.0399207e-03   5.4438248e-03   4.6655452e-03   3.1712788e-03   1.8642110e-03   7.9222751e-04  -1.5277135e-04  -1.5131537e-03  -2.2776358e-03  -2.9884735e-03  -2.5259146e-03  -2.7360840e-03  -3.6648009e-03  -3.7783344e-03  -3.7725065e-03  -5.3009861e-03  -6.3220832e-03  -6.4040397e-03  -7.2532180e-03  -8.5848540e-03  -9.6575091e-03  -1.1366075e-02  -1.2985192e-02  -1.4568976e-02  -1.6247669e-02  -1.7503495e-02  -1.8320557e-02  -1.9908618e-02  -2.1258425e-02  -2.1628371e-02  -2.2148934e-02  -2.3086926e-02  -2.2817057e-02  -2.2965434e-02  -2.2936248e-02  -2.2211721e-02  -2.1124410e-02  -1.9954300e-02  -1.7659677e-02  -1.4760908e-02  -1.1082164e-02  -6.0319945e-03  -1.0477243e-03   4.2769973e-03   1.0475243e-02   1.6443247e-02   2.1943758e-02   2.8699698e-02   3.5214983e-02   4.0822375e-02   4.6280545e-02   5.1462045e-02   5.5141550e-02   5.7750749e-02   5.9224684e-02   6.0292177e-02   6.2017586e-02   6.4205960e-02   6.7807654e-02   7.2422463e-02   7.7359090e-02   8.1652213e-02   8.5908059e-02   9.0064878e-02   9.3232973e-02   9.7126013e-02   1.0097072e-01   1.0401946e-01   1.0547304e-01   1.0691786e-01   1.0561991e-01   1.0290655e-01   9.9830550e-02   9.6246981e-02   9.1643416e-02   8.7414625e-02   8.3353548e-02   7.9592038e-02   7.5866068e-02   7.1243301e-02   6.7414949e-02   6.4382697e-02   6.1470122e-02   6.0085978e-02   6.1033120e-02   6.1626824e-02   6.1962635e-02   6.2803576e-02   6.2672739e-02   6.2206261e-02   6.1987087e-02   6.1340480e-02   6.0272462e-02   5.8468557e-02   5.6067361e-02   5.3138988e-02   4.9852281e-02   4.5504847e-02   4.1228614e-02   3.6736544e-02   3.2144607e-02   2.7692666e-02   2.3454824e-02   2.0117421e-02   1.5968158e-02   1.2080196e-02   8.6405930e-03   5.2976175e-03   1.1043667e-03  -1.8688618e-03  -4.8940571e-03  -7.6604675e-03  -1.0197935e-02  -1.2121245e-02  -1.3802311e-02  -1.5966629e-02  -1.7963826e-02  -1.9959906e-02  -2.1347665e-02  -2.2644368e-02  -2.3116712e-02  -2.3224259e-02  -2.3099673e-02  -2.3432142e-02  -2.3689385e-02  -2.3885556e-02  -2.4419520e-02  -2.4242734e-02  -2.3679600e-02  -2.2859027e-02  -2.1915139e-02  -2.0901191e-02  -2.0101739e-02  -1.9133547e-02  -1.8873696e-02  -1.8723104e-02  -1.7820453e-02  -1.6712325e-02  -1.6036044e-02  -1.4898217e-02  -1.3529923e-02  -1.2213868e-02  -1.1229736e-02  -1.0471465e-02  -9.4968141e-03  -8.2394930e-03  -7.3855926e-03  -6.1292028e-03  -4.6453950e-03  -3.0845201e-03  -1.6749223e-03  -1.1133937e-03  -8.6100168e-04  -3.8548154e-04  -5.2220951e-04  -8.7735244e-04  -3.8901608e-04   2.6408369e-04   1.2416747e-03   2.4930055e-03   4.1157790e-03   5.3462633e-03   6.1627969e-03   6.5367458e-03   7.0288523e-03   6.8648429e-03   6.7091407e-03   7.1398270e-03   7.6499854e-03   7.9722529e-03   8.4140326e-03   9.3414607e-03   1.0057342e-02   1.0696192e-02   1.1235771e-02   1.1465477e-02   1.1865883e-02   1.1772593e-02   1.1713489e-02   1.2164240e-02   1.2970701e-02   1.3455019e-02   1.4293218e-02   1.4899573e-02   1.4899618e-02   1.4875714e-02   1.5178585e-02   1.4912551e-02   1.4571733e-02   1.4698497e-02   1.4163697e-02   1.3494257e-02   1.3257331e-02   1.3208865e-02   1.2740185e-02   1.2919596e-02   1.2998396e-02   1.3078820e-02   1.2945464e-02   1.2414540e-02   1.1742733e-02   1.0789827e-02   9.5063035e-03   8.5424183e-03   7.7978139e-03   7.3825095e-03   7.0546135e-03   6.3178409e-03   5.7075344e-03   5.2138093e-03   4.3375845e-03   3.5040881e-03   3.2260536e-03   2.4753528e-03   2.5556327e-03   2.4195427e-03   1.9758215e-03   2.4107136e-03   3.1642794e-03   2.8567485e-03   2.6278669e-03   2.4350783e-03   1.7860482e-03   9.0206488e-04   5.5564672e-04   1.1782508e-03   1.9415565e-03   3.2730657e-03   4.4573212e-03   6.0399091e-03   6.7758723e-03   7.7594948e-03   8.0322379e-03   8.5464940e-03   8.6289423e-03   9.0109649e-03   9.9526720e-03   1.0774397e-02   1.1510362e-02   1.2349787e-02   1.3014137e-02   1.3153247e-02   1.2900449e-02   1.2616252e-02   1.1766148e-02   1.1286760e-02   1.0020970e-02   9.4123596e-03   8.3761415e-03   7.7917458e-03   7.0723356e-03   6.4602581e-03   5.6270952e-03   4.9401759e-03   4.0394090e-03   2.8816394e-03   2.0262609e-03   1.1014355e-03   1.5027086e-04  -8.1642883e-04  -1.5913154e-03  -1.8713079e-03  -1.6526109e-03  -1.2982141e-03  -1.2496027e-03  -1.3244946e-03  -1.8023279e-03  -2.5516971e-03  -3.3261273e-03  -3.3102661e-03  -3.6332002e-03  -4.3244538e-03  -4.7411296e-03  -4.6908149e-03  -4.6653474e-03  -4.2440407e-03  -3.2302994e-03  -2.7119349e-03  -2.3057137e-03  -2.6763415e-03  -2.5145281e-03  -2.1483189e-03  -1.9456464e-03  -1.4541601e-03   2.6591337e-05   2.0622087e-03   3.4984550e-03   4.5890476e-03   5.1306580e-03   5.1946773e-03   5.2980947e-03   5.3662694e-03   6.7484255e-03   8.7346812e-03   1.0325876e-02   1.1324949e-02   1.1806881e-02   1.1151384e-02   9.2106414e-03   7.5937893e-03   4.5316891e-03   1.8272041e-03  -6.9833026e-04  -2.3954291e-03  -3.9121878e-03  -4.1078334e-03  -4.4985627e-03  -4.5366435e-03  -4.5281866e-03  -4.8780795e-03  -5.5395385e-03  -4.9842084e-03  -4.1349488e-03  -2.6830568e-03  -8.4466907e-04   5.6601592e-04   1.8052851e-03   2.7620550e-03   3.6169009e-03   4.6833922e-03   6.6146342e-03   8.2993378e-03   1.1172453e-02   1.4500461e-02   1.7625086e-02   2.0173617e-02   2.3631501e-02   2.5842177e-02   2.6917776e-02   2.7968635e-02   2.8280677e-02   2.7643491e-02   2.6051987e-02   2.4215790e-02   2.1065312e-02   1.8372897e-02   1.6058056e-02   1.3659408e-02   1.2151822e-02   1.2114542e-02   1.2873118e-02   1.2815238e-02   1.3175260e-02   1.3355781e-02   1.4047141e-02   1.3898649e-02   1.2015829e-02   1.1116483e-02   1.3106337e-02   1.1202793e-02   9.6866424e-03   9.8917427e-03   9.1975968e-03   5.4569067e-03   3.6885718e-03   1.3948941e-03  -2.0101186e-04  -2.0449043e-03  -4.5678965e-03  -6.2116398e-03  -7.4761845e-03  -9.4671051e-03  -1.1117740e-02  -1.1885296e-02  -1.1819407e-02  -1.1983284e-02  -1.2344342e-02  -1.2646652e-02  -1.2563179e-02  -1.3229847e-02  -1.3552742e-02  -1.3301268e-02  -1.2735069e-02  -1.3018539e-02  -1.3218423e-02  -1.2276956e-02  -1.2131947e-02  -1.2182902e-02  -1.2356183e-02  -1.2088689e-02  -1.2281356e-02  -1.1386996e-02  -1.0521685e-02  -8.9687143e-03  -7.6742373e-03  -6.8182626e-03  -5.9659380e-03  -5.2115669e-03  -4.3157856e-03  -3.5402852e-03  -2.3537839e-03  -1.5472688e-03   9.2997844e-04   2.7801641e-03   5.1675840e-03   8.0003132e-03   1.0916111e-02   1.2399324e-02   1.4847321e-02   1.7939153e-02   2.0062868e-02   2.2169830e-02   2.4944501e-02   2.7770275e-02   3.0037383e-02   3.2316676e-02   3.5279063e-02   3.8282345e-02   4.0462462e-02   4.2224991e-02   4.4838641e-02   4.6166304e-02   4.6502618e-02   4.7514035e-02   4.7493844e-02   4.7573316e-02   4.7922924e-02   4.8202030e-02   4.7062075e-02   4.6001678e-02   4.4768380e-02   4.3366132e-02   4.2189864e-02   4.1072519e-02   4.0226726e-02   3.8024142e-02   3.6151590e-02   3.3763036e-02   3.2459151e-02   3.1434946e-02   3.0815849e-02   2.9676244e-02   3.0201596e-02   2.9888529e-02   3.0094391e-02   2.9969376e-02   3.0451158e-02   2.9053799e-02   2.8054656e-02   2.6305847e-02   2.4456662e-02   2.6202897e-02   1.7982804e-02   2.0571153e-02   1.9884126e-02   1.9245800e-02   1.4471386e-02   2.0453402e-02   1.5074194e-02   1.3520168e-02   1.1629428e-02   1.0980896e-02   1.0239955e-02   9.4553300e-03   8.3263600e-03   8.6524991e-03   7.6998719e-03   6.5859281e-03   5.7298125e-03   5.5379592e-03   4.3730880e-03   3.3000483e-03   3.2991210e-03   2.6911045e-03   2.0018188e-03   1.2512993e-03   1.2072498e-03   1.6659611e-04  -4.5328590e-05  -7.2015420e-04  -1.3799755e-03  -1.8661917e-03  -3.2596095e-03  -3.5051670e-03  -3.9255152e-03  -4.5542477e-03  -5.1981269e-03  -4.6856978e-03  -5.7919660e-03  -6.6954926e-03  -6.6615762e-03  -7.0363064e-03  -7.6749233e-03  -7.7211914e-03  -7.9250957e-03  -8.4609686e-03  -8.7547935e-03  -8.8646806e-03  -8.8773493e-03  -9.1072060e-03  -8.9343667e-03  -8.9402721e-03  -8.8332955e-03  -8.8341340e-03  -8.2844541e-03  -7.9930213e-03  -7.6364535e-03  -7.0845384e-03  -6.8063538e-03  -6.1437819e-03  -5.7371954e-03  -5.7827551e-03  -5.7786319e-03  -5.3575213e-03  -5.2402396e-03  -5.2167586e-03  -4.8986483e-03  -4.3190572e-03  -3.8704857e-03  -3.6909658e-03  -3.3113842e-03  -2.5981109e-03  -2.6704461e-03  -2.5080607e-03  -1.9621465e-03  -1.5335677e-03  -1.2640503e-03  -5.5641094e-04  -9.5948474e-05  -1.5473646e-04   2.2274703e-04   4.0713954e-04   9.0261373e-04   1.0535406e-03   1.5203877e-03   1.4455287e-03   1.5243521e-03   1.5938619e-03   1.8931226e-03   1.9516778e-03   2.6160214e-03   3.3856431e-03   3.4960001e-03   3.6799467e-03   4.0925864e-03   4.2357790e-03   4.2939593e-03   4.9185730e-03   4.8147998e-03   4.6435037e-03   4.6094882e-03   4.6017331e-03   4.2337102e-03   4.5122794e-03   4.9755044e-03   4.9041855e-03   4.7142271e-03   4.5265464e-03   4.4092193e-03   4.1348719e-03   4.0970726e-03   4.0625216e-03   4.2824839e-03   4.4982330e-03   4.3400191e-03   4.1334580e-03   4.1596927e-03   3.9334770e-03   3.7869309e-03   4.0471850e-03   4.1945547e-03   4.2792575e-03   4.2641453e-03   4.1396408e-03   3.7879792e-03   3.7463134e-03   3.6445976e-03   3.5842142e-03   3.5218624e-03   3.7374033e-03   3.7778210e-03   3.6729758e-03   3.6136367e-03   3.6941804e-03   3.4608939e-03   3.3190979e-03   3.2411718e-03   3.0831693e-03   2.7252125e-03   2.7548685e-03   2.6200281e-03   2.4514896e-03   2.2510615e-03   2.3230438e-03   2.0695699e-03   1.9147539e-03   1.9531957e-03   2.1143953e-03   1.8492158e-03   1.5566670e-03   1.4845497e-03   1.0423637e-03   9.0918039e-04   1.0141339e-03   1.4125125e-03   1.5683598e-03   2.3722637e-03   2.4799469e-03   2.3290739e-03   2.0026829e-03   1.7824778e-03   1.2978102e-03   1.1372575e-03   1.1364258e-03   1.4516678e-03   1.2990801e-03   1.2565126e-03   1.2244858e-03   1.3095273e-03   1.0758702e-03   1.3150479e-03   1.4238349e-03   1.4019373e-03   1.4512412e-03   1.3997269e-03   1.3713621e-03   1.1385549e-03   1.5205402e-03   9.1044292e-04   1.2094838e-03   1.3130358e-03   1.5475758e-03   1.3455105e-03   1.8058473e-03   1.5602499e-03   1.2861715e-03   1.5429126e-03   1.5474144e-03   1.8250757e-03   1.8090396e-03   2.0989412e-03   1.8840585e-03   1.9469358e-03   1.7429056e-03   1.4013779e-03   1.1575811e-03   7.9813905e-04   6.4487108e-04   6.5095667e-04   8.5635807e-04   1.2045577e-03   1.3135416e-03   1.1562765e-03   1.1987531e-03   1.2285963e-03   6.7708606e-04   5.0987256e-04   1.8852228e-04  -5.0710145e-04  -7.2406108e-04  -7.0515519e-04  -8.2923256e-04  -4.9653878e-04  -2.7525426e-04  -4.5861362e-04  -5.2573487e-04  -9.4621726e-04  -6.2552705e-04
  -8.3252297e-03  -5.0516927e-03  -3.0972491e-03  -3.1843061e-03  -2.1084206e-03  -1.6708922e-03  -2.9525157e-03  -3.0452695e-03  -1.0983997e-03  -1.8617410e-03  -2.7553799e-03  -1.7957424e-03  -1.9096351e-03  -2.2001329e-03  -8.1162212e-04   4.9925045e-04   7.2387161e-04   1.8751286e-03   3.1345226e-03   3.8010363e-03   3.2876677e-03   3.1547448e-03   3.2999444e-03   2.5501155e-03   1.0635917e-03   1.4021192e-03   2.4904360e-03   2.4405857e-03   3.9466880e-03   6.8136994e-03   8.2336996e-03   8.7099514e-03   1.5310014e-02   1.5339555e-02   1.8710251e-02   2.0280527e-02   2.1348241e-02   1.6488509e-02   1.6980572e-02   1.2955929e-02   1.0913968e-02   1.0108961e-02   1.0657952e-02   1.1137502e-02   1.1138537e-02   1.2285907e-02   1.2436869e-02   1.1473365e-02   1.0890736e-02   1.0084682e-02   8.1924584e-03   8.5940456e-03   7.3375032e-03   6.0003423e-03   6.0458123e-03   6.8821891e-03   5.3833114e-03   3.8289906e-03   3.2718155e-03   1.8475695e-03  -5.8434027e-04  -2.1741341e-03  -1.5636741e-03  -1.8718430e-03  -1.2191704e-03   3.7938515e-05   4.2814866e-04   3.2793701e-03   4.0000383e-03   4.0713816e-03   4.9300213e-03   6.2038212e-03   4.7245705e-03   6.1763189e-03   7.2899545e-03   7.0705238e-03   8.6823271e-03   1.0359214e-02   1.0849090e-02   1.1784362e-02   1.3435614e-02   1.3696179e-02   1.3679855e-02   1.3796002e-02   1.5020879e-02   1.5440791e-02   1.5510747e-02   1.6456065e-02   1.7896839e-02   1.8345072e-02   1.8991167e-02   1.9232631e-02   1.7192390e-02   1.3788942e-02   1.1121514e-02   7.9321737e-03   5.0613950e-03   5.1871487e-03   5.3895761e-03   4.5597482e-03   6.0854545e-03   7.5553904e-03   6.3656737e-03   4.5635634e-03   3.2823602e-03   1.7154471e-03   3.1975587e-04  -5.1936019e-04  -1.7211215e-03  -2.3752863e-03  -5.1026749e-03  -7.7473268e-03  -9.2922484e-03  -8.9661449e-03  -9.3101106e-03  -8.8777974e-03  -9.2864942e-03  -9.8487262e-03  -9.2193890e-03  -8.9349762e-03  -7.8575502e-03  -6.5750431e-03  -6.7306032e-03  -8.4016960e-03  -1.0499741e-02  -1.2238096e-02  -1.3372631e-02  -1.3340396e-02  -1.3795038e-02  -1.3002226e-02  -1.2181331e-02  -1.1561632e-02  -1.1608926e-02  -1.2459687e-02  -1.4045895e-02  -1.5234534e-02  -1.5766987e-02  -1.5421811e-02  -1.3878274e-02  -1.2034558e-02  -1.0206164e-02  -7.3317556e-03  -4.6634833e-03  -3.0002515e-03   1.7615368e-04   2.6131043e-03   3.5121395e-03   4.1044033e-03   6.4965975e-03   8.7234231e-03   8.0556921e-03   8.5742441e-03   9.6805124e-03   9.4818000e-03   9.1269500e-03   1.1712083e-02   1.2019403e-02   1.1464894e-02   1.2881303e-02   1.3925828e-02   1.5054338e-02   1.7435104e-02   2.1032448e-02   2.4046021e-02   2.6814262e-02   2.9394791e-02   3.1519818e-02   3.2738641e-02   3.5601036e-02   3.8215702e-02   4.0342174e-02   4.2985505e-02   4.5243033e-02   4.5084105e-02   4.4903339e-02   4.5062822e-02   4.5604053e-02   4.5872911e-02   4.6028783e-02   4.6194122e-02   4.6043602e-02   4.3562105e-02   4.1633073e-02   3.9808867e-02   3.5935331e-02   3.1502240e-02   2.8302482e-02   2.5585550e-02   2.3519319e-02   2.1940102e-02   2.0800419e-02   1.9352602e-02   1.7279342e-02   1.5109602e-02   1.3205736e-02   1.2542063e-02   1.3022227e-02   1.3992758e-02   1.2546792e-02   1.2065793e-02   1.0097963e-02   6.8989551e-03   4.5218155e-03   5.7573746e-03   7.2762876e-03   7.0192864e-03   6.9050333e-03   4.9844870e-03   2.4460469e-03   7.6880790e-04   6.6321090e-04  -3.6609661e-04  -5.3005697e-04  -8.8588995e-04  -3.0071914e-03  -4.7683058e-03  -4.9321825e-03  -4.8579618e-03  -5.4151031e-03  -5.7965502e-03  -6.4247314e-03  -7.0089338e-03  -8.2545917e-03  -8.6736035e-03  -7.5212355e-03  -6.0883098e-03  -4.6875439e-03  -2.0166528e-03  -5.3854787e-05   4.9946044e-04   1.0112803e-03   1.0904371e-03   1.2006356e-03  -2.9562220e-04  -7.2311758e-04  -6.3264604e-04  -1.4882853e-05   6.9035336e-04   2.9707941e-03   4.1563633e-03   5.5004547e-03   4.9851626e-03   2.0096162e-03   5.1432229e-04   4.7029111e-04  -1.6505430e-03  -1.4251931e-03   1.5060869e-03   2.3972132e-03   1.4352436e-03   1.6092138e-03   1.3911930e-03   3.9000084e-04  -4.0368505e-04  -5.5804220e-04  -2.0431829e-04  -5.8235685e-04  -6.0386588e-04   5.4606942e-04   1.1949313e-03   2.6198105e-03   4.4612073e-03   5.6050925e-03   5.0295221e-03   4.9187265e-03   5.1373525e-03   5.7359287e-03   6.0825067e-03   7.0919472e-03   7.9487584e-03   8.1296463e-03   8.5076590e-03   9.6593639e-03   9.5679615e-03   1.0765480e-02   1.1934282e-02   1.2313495e-02   1.1564923e-02   1.2138752e-02   1.3868769e-02   1.4163526e-02   1.3439410e-02   1.3884426e-02   1.4148409e-02   1.2546061e-02   1.1251556e-02   1.0783782e-02   1.0120078e-02   9.2764352e-03   7.0005520e-03   5.7574120e-03   4.9353144e-03   3.4653912e-03   2.2552249e-03   2.0543533e-03   1.4532939e-03   1.1446851e-03   1.1662464e-03   7.9676765e-04   1.0246821e-03   2.4800826e-03   2.6307295e-03   2.7565219e-03   3.0216572e-03   2.9107399e-03   6.4731863e-04  -1.1716547e-03  -1.9423825e-03  -1.2655767e-03  -1.2143396e-03  -6.8177077e-04  -5.9283942e-04  -1.2301370e-03  -3.2905433e-03  -4.8257547e-03  -5.5381869e-03  -5.1263739e-03  -5.1456055e-03  -5.0844136e-03  -4.9944832e-03  -3.7835207e-03  -2.3896862e-03  -3.5533260e-03  -5.0374934e-03  -6.0616388e-03  -8.0435540e-03  -9.9663335e-03  -9.5674487e-03  -9.2307797e-03  -9.1485724e-03  -9.1575247e-03  -8.8425948e-03  -6.8548436e-03  -4.8655690e-03  -2.9815370e-03  -2.5915846e-03  -2.3308620e-03  -3.4944105e-03  -4.4652354e-03  -4.4173263e-03  -2.9337852e-03  -2.1030383e-03  -4.0137109e-04  -2.5169974e-04  -1.4670252e-03  -2.3231706e-03  -2.7413611e-03  -4.3388096e-03  -4.1707123e-03  -3.7523349e-03  -4.3415347e-03  -5.0618306e-03  -5.8889675e-03  -5.9993453e-03  -6.7218214e-03  -4.4111948e-03  -1.6101431e-03   2.1631022e-03   6.4492220e-03   1.3153709e-02   1.9479981e-02   2.7398644e-02   3.8643862e-02   5.4011947e-02   6.9350252e-02   8.1591788e-02   8.9555982e-02   8.9979882e-02   8.1500460e-02   6.7895414e-02   5.2608779e-02   3.7620445e-02   2.4348766e-02   1.3489722e-02   6.6838225e-03   1.6275093e-03  -2.4539971e-03  -4.8566627e-03  -5.6896869e-03  -7.5114657e-03  -8.7982799e-03  -9.5025819e-03  -1.0259840e-02  -1.1408456e-02  -1.3072648e-02  -1.4395779e-02  -1.4501534e-02  -1.4749455e-02  -1.5581858e-02  -1.4973148e-02  -1.2837702e-02  -1.0832089e-02  -7.8706014e-03  -2.8097143e-03   3.7039850e-03   1.0057504e-02   1.8081029e-02   2.8680518e-02   4.2239582e-02   5.4359120e-02   6.6224167e-02   7.5834340e-02   8.0742662e-02   7.8182732e-02   7.1636804e-02   6.1339848e-02   4.9070584e-02   3.5386086e-02   2.3590147e-02   1.5134922e-02   9.2235525e-03   4.4333862e-03   2.4909609e-03   2.1332667e-03   2.2630278e-03   1.8804578e-03   9.7972627e-04   8.2822001e-04   2.9124796e-04  -5.3275922e-04  -2.1844776e-03  -1.5809642e-03  -1.8573315e-03  -1.1892894e-03   3.3553383e-05   1.8898789e-03   1.8073856e-03   2.7309215e-03   3.5926650e-03   3.7619336e-03   4.7761063e-03   6.1644612e-03   6.5889855e-03   6.9315099e-03   6.7600152e-03   5.5356129e-03   4.8415944e-03   5.4505884e-03   6.2649336e-03   7.5529406e-03   8.4616433e-03   9.3102608e-03   9.4874656e-03   9.1071352e-03   8.2826844e-03   8.7217896e-03   8.5366278e-03   7.5192139e-03   6.8640556e-03   6.9674114e-03   6.3112287e-03   5.3658333e-03   4.1611287e-03   1.8460274e-03  -7.8013859e-04  -2.8537360e-03  -3.7980081e-03  -3.1784505e-03  -2.1584545e-03  -1.3698114e-03  -4.6798119e-04   2.9163918e-05  -4.9493295e-04  -1.4030209e-03  -1.9587594e-03  -2.1849419e-03  -2.5820983e-03  -2.9452559e-03  -4.0448398e-03  -4.3369436e-03  -4.6503762e-03  -5.8765682e-03  -6.0191258e-03  -4.9071475e-03  -5.6438611e-03  -6.6439278e-03  -6.4884135e-03  -7.1848015e-03  -7.8187231e-03  -7.7582713e-03  -6.1023809e-03  -4.2826545e-03  -3.2814162e-03  -2.2293136e-03  -8.2585630e-04  -1.4801377e-03  -2.0089706e-03  -3.9665360e-04   1.6228256e-03   3.5402290e-03   6.4794158e-03   8.7037827e-03   1.1292478e-02   1.3023585e-02   1.5330202e-02   1.6749967e-02   1.8098515e-02   1.7882225e-02   1.7439797e-02   1.5737409e-02   1.4001057e-02   1.2080611e-02   9.5649815e-03   7.1027139e-03   6.5120314e-03   5.5681688e-03   4.6297659e-03   4.4318880e-03   3.7428238e-03   1.6503074e-03  -1.5084381e-05  -8.9921195e-04  -1.6265023e-03  -1.0743200e-03   2.1740255e-04   1.2966954e-03   2.8791539e-03   3.9256222e-03   3.0875583e-03   2.9926964e-03   4.6851520e-03   5.1151628e-03   5.5985059e-03   7.1740768e-03   7.1415596e-03   6.1836206e-03   6.0378109e-03   5.5975180e-03   5.3841995e-03   5.5817566e-03   4.8837909e-03   2.9636827e-03   2.9409907e-03   2.9046796e-03   2.4662477e-03   2.3612854e-03   2.5676794e-03   1.1550013e-03   9.8148936e-05  -9.9224981e-04  -2.1138067e-03  -2.9416629e-03  -5.4664900e-03  -6.4711599e-03  -7.5733878e-03  -9.0435006e-03  -1.0340311e-02  -9.9709386e-03  -1.0608195e-02  -1.0812467e-02  -1.1221796e-02  -1.0834624e-02  -1.0406857e-02  -1.1146599e-02  -1.0266259e-02  -7.7612667e-03  -5.8086765e-03  -3.5870211e-03  -8.1840551e-04   2.4303430e-04   1.3831170e-03   4.5375206e-03   6.2698919e-03   8.9149520e-03   1.1925401e-02   1.4128487e-02   1.4617256e-02   1.6571306e-02   1.7752558e-02   1.8509976e-02   2.0685776e-02   2.2925648e-02   2.3692047e-02   2.3616974e-02   2.4057465e-02   2.2380525e-02   2.1507535e-02   2.0941019e-02   2.0726849e-02   2.0368147e-02   2.0528600e-02   2.0185585e-02   2.2013286e-02   2.4077097e-02   2.5782585e-02   2.8387517e-02   3.1021605e-02   3.4259703e-02   3.8875185e-02   4.4835471e-02   5.1137658e-02   5.7788558e-02   6.2635923e-02   6.5038590e-02   6.5208189e-02   6.3424200e-02   5.9249026e-02   5.3702558e-02   4.8477915e-02   4.3060016e-02   3.7819964e-02   3.5330412e-02   3.1135932e-02   2.8436024e-02   2.5508557e-02   2.2523059e-02   1.8451259e-02   1.7185652e-02   1.4922606e-02   1.3609832e-02   1.2671837e-02   1.1286690e-02   9.6266943e-03   7.8147668e-03   6.1360510e-03   4.7368405e-03   2.2094859e-03   7.9172609e-04  -4.9993411e-04  -7.2781744e-04  -1.6304802e-03  -1.9017691e-03  -2.5885887e-03  -2.5449377e-03  -2.8357710e-03  -2.4627387e-03  -1.7107049e-03  -1.4786085e-03  -2.5180998e-03  -3.8874949e-03  -4.5312158e-03  -5.8854979e-03  -7.4531740e-03  -7.8329184e-03  -8.1397364e-03  -8.6014797e-03  -8.4747749e-03  -8.2690076e-03  -7.8947882e-03  -8.6508599e-03  -9.5536936e-03  -9.1058272e-03  -8.6096388e-03  -9.1735730e-03  -9.1002469e-03  -8.6459768e-03  -9.5172917e-03  -9.8299199e-03  -1.0654384e-02  -1.0816820e-02  -1.0750464e-02  -1.0368482e-02  -1.0439683e-02  -9.1454956e-03  -9.5825842e-03  -1.0200719e-02  -9.6121497e-03  -9.1344466e-03  -9.4774830e-03  -8.0228561e-03  -6.8050730e-03  -6.7687145e-03  -6.3365526e-03  -4.8361484e-03  -3.5307301e-03  -4.7704915e-03  -5.0728657e-03  -5.2133402e-03  -4.8207558e-03  -5.5607126e-03  -4.5137495e-03  -3.8988848e-03  -3.7612814e-03  -5.1048348e-03  -5.2607494e-03  -4.9115866e-03  -5.2005476e-03  -5.6061440e-03  -5.6322431e-03  -6.5434316e-03  -8.2072250e-03  -9.1908496e-03  -1.0193556e-02  -1.0023962e-02  -9.6375677e-03  -9.7474173e-03  -9.8154253e-03  -9.0825652e-03  -1.0534207e-02  -1.0571611e-02  -9.8019010e-03  -9.5489252e-03  -7.8312701e-03  -4.1025680e-03  -5.3538887e-04   3.9100462e-03   8.8131876e-03   1.1692650e-02   1.5984654e-02   2.0744129e-02   2.4866805e-02   3.0127445e-02   3.5556890e-02   4.0260461e-02   4.2872505e-02   4.6281642e-02   4.8561968e-02   5.0910300e-02   5.1081070e-02   5.1809988e-02   5.1443020e-02   4.9677505e-02   4.7461970e-02   4.5831350e-02   4.4816606e-02   4.2270093e-02   3.9259285e-02   3.6739677e-02   3.2373897e-02   2.7483248e-02   2.3805928e-02   2.0804623e-02   1.7133104e-02   1.5259531e-02   1.2382139e-02   1.0128096e-02   8.4821432e-03   7.1326181e-03   5.8847470e-03   5.8546997e-03   5.3275342e-03   4.1907563e-03   3.9834536e-03   5.1923129e-03   6.4927421e-03   8.1268456e-03   1.1698468e-02   1.4094400e-02   1.5881577e-02   1.9204125e-02   2.4412182e-02   2.9201886e-02   3.5363343e-02   4.1860490e-02   4.8733245e-02   5.5077519e-02   6.0331512e-02   6.4466704e-02   6.7185711e-02   6.7998582e-02   6.8022098e-02   6.7529243e-02   6.7247123e-02   6.5321572e-02   6.1807296e-02   5.7409744e-02   5.2872187e-02   4.7325902e-02   4.1881685e-02   3.7083098e-02   3.2511956e-02   2.7198476e-02   2.2363559e-02   1.8032658e-02   1.4454160e-02   9.6291863e-03   6.4242249e-03   3.3449696e-03  -7.3903338e-04  -5.1127116e-03  -7.8613981e-03  -1.0631366e-02  -1.3248453e-02  -1.4408721e-02  -1.6878586e-02  -1.8422614e-02  -1.9809745e-02  -2.1466005e-02  -2.3164464e-02  -2.1443065e-02  -2.1041029e-02  -2.0660511e-02  -1.7965917e-02  -1.4873837e-02  -1.3087321e-02  -1.1500776e-02  -9.0405970e-03  -7.5540690e-03  -5.4956881e-03  -3.2509047e-03  -5.8150606e-04   8.6970667e-04   1.3535952e-03   1.3273713e-03   4.8148987e-04  -7.5472962e-05   6.0156734e-04   1.5555436e-03   3.6984092e-04  -5.5348761e-04  -1.1640597e-03  -3.0928529e-03  -5.1404137e-03  -5.0163114e-03  -3.8814291e-03  -4.5246704e-03  -4.3938585e-03  -4.2583666e-03  -3.6822061e-03  -3.7774493e-03  -2.1768809e-03  -4.5220327e-04   1.4949015e-03   3.2776542e-03   4.7133587e-03   5.9064360e-03   6.6664736e-03   6.3077531e-03   6.5118705e-03   7.4138904e-03   7.5445614e-03   8.0867728e-03   1.0695534e-02   1.0748790e-02   1.0920476e-02   1.2512222e-02   1.3132562e-02   1.3123141e-02   1.4088906e-02   1.3492524e-02   1.2045329e-02   1.0728379e-02   8.0504373e-03   6.4202976e-03   5.9434299e-03   4.6842747e-03   3.1242783e-03   3.0971412e-03   3.3242481e-03   2.4085218e-03   1.3120270e-03   9.5769276e-04  -1.7321267e-04  -2.3449145e-03  -4.4695546e-03  -4.4666592e-03  -5.7251637e-03  -6.6640334e-03  -7.3504021e-03  -6.6021124e-03  -7.0738905e-03  -6.3326249e-03  -6.2387666e-03  -4.5423913e-03  -2.7625033e-03  -1.7794015e-03  -1.4977066e-03   4.8434061e-04   1.9470591e-03   1.9476389e-03   2.4798387e-03   4.2741580e-03   5.0358317e-03   4.7671413e-03   5.7125778e-03   6.7671536e-03   6.4703747e-03   6.2576367e-03   6.3858923e-03   6.1490939e-03   5.8313050e-03   6.5278621e-03   7.7432031e-03   8.5199374e-03   9.2298552e-03   1.1264186e-02   1.2082196e-02   1.2090646e-02   1.2880043e-02   1.3171738e-02   1.1149484e-02   1.1709885e-02   1.2427385e-02   1.2500912e-02   1.2786298e-02   1.4627944e-02   1.6290799e-02   1.7878328e-02   1.8311333e-02   1.8653383e-02   1.8816479e-02   1.7137089e-02   1.6122970e-02   1.6798636e-02   1.7295024e-02   1.7309259e-02   1.6534468e-02   1.5579942e-02   1.4395657e-02   1.3335697e-02   1.3427296e-02   1.3997613e-02   1.2612641e-02   1.1969213e-02   1.1382088e-02   8.8714016e-03   7.7587374e-03   8.2977877e-03   8.5343903e-03   8.2185561e-03   8.0149070e-03   7.7826696e-03   8.5424422e-03   7.3344622e-03   6.8055119e-03   8.0809284e-03   8.7619585e-03   8.7527158e-03   1.0221641e-02   1.1527054e-02   1.2591998e-02   1.3763325e-02   1.4361509e-02   1.4763271e-02   1.5147595e-02   1.5132276e-02   1.5860323e-02   1.7016292e-02   1.7246295e-02   1.7926125e-02   1.7976736e-02   1.6950801e-02   1.5567796e-02   1.3882729e-02   1.2715460e-02   1.1911620e-02   9.7862326e-03   6.8431035e-03   5.7183563e-03   3.4890252e-03   1.9504504e-03   1.3396984e-03   1.1995460e-03   5.7196138e-04  -4.3552923e-05  -1.4851786e-03  -2.5897474e-03  -3.5527550e-03  -4.2803289e-03  -5.5900355e-03  -6.2858640e-03  -6.6978493e-03  -7.8394994e-03  -8.9309547e-03  -8.5562706e-03  -8.4314582e-03  -8.6041067e-03  -8.1883010e-03  -8.3781210e-03  -9.4699880e-03  -1.0661587e-02  -1.1902431e-02  -1.3560590e-02  -1.4685199e-02  -1.4819147e-02  -1.5864046e-02  -1.6345150e-02  -1.5717390e-02  -1.5951578e-02  -1.6431504e-02  -1.6148758e-02  -1.5735673e-02  -1.6000468e-02  -1.5118375e-02  -1.3739686e-02  -1.2940350e-02  -1.2127990e-02  -1.0523660e-02  -8.9989063e-03  -8.4669296e-03  -7.5034397e-03  -7.2700095e-03  -7.6526930e-03  -8.9390319e-03  -1.0124224e-02  -1.1291864e-02  -1.1937797e-02  -1.1424741e-02  -1.0371696e-02  -8.4650916e-03  -4.6325558e-03   1.7079121e-03   1.0854064e-02   2.5465831e-02   4.6575001e-02   7.6589442e-02   1.1613210e-01   1.6325266e-01   2.1319626e-01   2.5803159e-01   2.8877290e-01   2.9932174e-01   2.8701749e-01   2.5570379e-01   2.1265443e-01   1.6616792e-01   1.2249975e-01   8.7046162e-02   6.1026358e-02   4.3056874e-02   3.1269309e-02   2.4012301e-02   1.8929942e-02   1.4878281e-02   1.1208192e-02   7.5418154e-03   4.7683274e-03   9.1730194e-04  -3.2176449e-03  -8.0044945e-03  -1.2229411e-02  -1.7432640e-02  -2.0777666e-02  -2.3787665e-02  -2.5225206e-02  -2.6350517e-02  -2.7388774e-02  -2.8576244e-02  -2.9207369e-02  -3.0047870e-02  -3.0948915e-02  -3.1105841e-02  -3.0544788e-02  -2.9697599e-02  -2.8174363e-02  -2.5819086e-02  -2.3264523e-02  -2.0182241e-02  -1.6591772e-02  -1.1867829e-02  -6.3206527e-03   8.6797159e-04   8.3026433e-03   1.6318313e-02   2.4883725e-02   3.2067652e-02   3.7910288e-02   4.2610525e-02   4.5404995e-02   4.4277493e-02   4.2174057e-02   3.7868611e-02   3.2496177e-02   2.6264497e-02   2.0446032e-02   1.4642716e-02   1.0315535e-02   6.1969486e-03   3.4125035e-03   6.2648077e-04  -8.8605800e-04  -1.4615773e-03  -1.3952645e-03  -1.0292235e-03  -1.1430462e-03  -1.2155119e-03  -1.8242795e-03  -1.5212305e-03  -1.5352683e-03   3.9531918e-04   1.9566500e-03   2.3107906e-03   2.3978016e-03   2.7850826e-03   2.8158080e-03   2.6932485e-03   4.0889400e-03   4.8969447e-03   4.7117548e-03   5.2780976e-03   5.9591372e-03   5.7725347e-03   5.4283315e-03   4.7814745e-03   4.0641318e-03   3.4740613e-03   2.6499361e-03   2.3399949e-03   2.2572116e-03   2.5587309e-03   3.1580795e-03   3.8484645e-03   3.7778219e-03   4.2730944e-03   4.6377349e-03   3.8194390e-03   3.8432537e-03   4.2457525e-03   5.0395716e-03   5.3876753e-03   5.4198278e-03   4.8660883e-03   4.3631785e-03   3.0604640e-03   1.4465992e-03   9.7515586e-04   5.8066684e-04  -5.8020608e-04  -8.7471761e-04  -1.1844221e-03  -1.8204407e-03  -2.2121348e-03  -1.6231610e-03  -1.6146284e-03  -1.8495899e-03  -3.0659966e-03  -2.7093548e-03  -1.6020258e-03  -5.7007955e-04   1.0085221e-03   4.1135377e-03   4.4677460e-03   6.0744507e-03   6.4885486e-03   8.5741147e-03   8.9357389e-03   9.9498376e-03   9.6925307e-03   1.0077768e-02   8.5434410e-03   8.8354113e-03   8.9291744e-03   7.9778000e-03   9.1535422e-03   1.0196572e-02   9.9898692e-03   1.0749466e-02   1.1603660e-02   9.9575521e-03   8.3106095e-03   6.4569336e-03   4.7657708e-03   2.8956532e-03   2.9928439e-03   1.6449680e-03   1.7241693e-03   5.0869934e-04  -5.5130049e-04  -2.4784166e-03  -2.7796990e-03  -4.1069515e-03  -4.4410610e-03  -4.2814751e-03  -2.9498304e-03  -2.3036040e-03  -1.1814029e-03   2.8409587e-04   1.6573864e-03   1.2065032e-03   2.0485214e-03   3.7924947e-03   4.8137493e-03   5.6396298e-03   7.5240957e-03   8.4311990e-03   8.0773575e-03   8.3038827e-03   8.9331843e-03   8.6863748e-03   9.0959467e-03   9.5053929e-03   9.1265127e-03   8.1733806e-03   6.7319815e-03   4.1883169e-03   2.6230338e-03   1.9487478e-03   1.5430494e-03   1.8555531e-03   2.4620030e-03   2.0898312e-03   3.4553755e-04  -1.6319972e-03  -3.3022629e-03  -4.9250785e-03  -5.8903843e-03  -5.3220271e-03  -4.4469795e-03  -3.6472606e-03  -2.0324214e-03  -2.9227672e-04   1.4391646e-03   3.7273179e-03   6.0572881e-03   9.3166493e-03   1.3274233e-02   1.6657060e-02   2.0313735e-02   2.4750404e-02   2.9116547e-02   3.3559240e-02   3.8124111e-02   4.2321997e-02   4.6798061e-02   5.0404150e-02   5.2452040e-02   5.4216729e-02   5.6154809e-02   5.7019762e-02   5.6105051e-02   5.3586735e-02   4.9549673e-02   4.3581024e-02   3.6290328e-02   2.9876553e-02   2.4235830e-02   1.9044481e-02   1.4046685e-02   9.3400796e-03   4.4304032e-03  -5.7560158e-04  -4.9333061e-03  -8.2720060e-03  -1.1137960e-02  -1.4176986e-02  -1.6083138e-02  -1.7459967e-02  -1.9434906e-02  -2.0495731e-02  -2.0585696e-02  -2.1017100e-02  -2.1282398e-02  -2.0411784e-02  -2.0295289e-02  -2.0311974e-02  -1.9222263e-02  -1.7489842e-02  -1.5882898e-02  -1.3868878e-02  -1.1591262e-02  -1.0478519e-02  -9.4870691e-03  -7.0568143e-03  -4.1734660e-03  -1.3184564e-03   3.1767028e-03   7.8947244e-03   1.1533647e-02   1.5533020e-02   2.0227478e-02   2.5221726e-02   3.0327173e-02   3.4429623e-02   3.7504076e-02   4.0154765e-02   4.1787135e-02   4.1668889e-02   4.1287300e-02   4.0839306e-02   3.9202687e-02   3.6240689e-02   3.2895976e-02   2.9064057e-02   2.4798995e-02   2.0474873e-02   1.5857400e-02   1.1842916e-02   8.5665699e-03   6.1014270e-03   4.5102953e-03   3.8001137e-03   3.5613435e-03   3.4639249e-03   3.6170532e-03   4.1968458e-03   5.0637456e-03   6.6483433e-03   9.0702548e-03   1.1553439e-02   1.3502817e-02   1.5940342e-02   1.8507502e-02   1.9914495e-02   2.1085378e-02   2.1749371e-02   2.1489601e-02   2.0710280e-02   2.0431746e-02   1.9244969e-02   1.7602715e-02   1.7140342e-02   1.5779307e-02   1.3237552e-02   1.1807309e-02   1.0555199e-02   8.2703611e-03   6.9386367e-03   5.5420164e-03   3.6394538e-03   2.0624571e-03   1.2217503e-03  -2.4945465e-04  -1.3011956e-03  -2.6575466e-03  -3.5491069e-03  -5.8013953e-03  -8.5606098e-03  -1.0242005e-02  -1.1747318e-02  -1.2853230e-02  -1.3826701e-02  -1.3145689e-02  -1.3197397e-02  -1.2380381e-02  -1.1722641e-02  -9.9656479e-03  -9.8257151e-03  -7.3329550e-03  -7.3805149e-03  -6.1256467e-03  -5.7403947e-03  -4.0035436e-03  -4.6273174e-03  -2.8568921e-03  -1.7677244e-03   4.6881655e-05   1.9929011e-03   5.6123138e-03   8.3975037e-03   1.1188990e-02   1.4742404e-02   1.8289979e-02   2.0941728e-02   2.4371038e-02   2.8542896e-02   3.2133929e-02   3.5030328e-02   3.7398261e-02   3.9022384e-02   3.9430769e-02   3.9016221e-02   3.8674940e-02   3.8865998e-02   3.7725983e-02   3.5066527e-02   3.2523153e-02   2.9184840e-02   2.3670323e-02   1.8601235e-02   1.4967924e-02   1.0229454e-02   4.8555337e-03   1.8061006e-03  -5.1444773e-04  -3.8992926e-03  -5.8549987e-03  -7.6266183e-03  -1.0690691e-02  -1.2915986e-02  -1.4067025e-02  -1.5285314e-02  -1.5193236e-02  -1.4510760e-02  -1.3386202e-02  -1.1873519e-02  -1.0653001e-02  -9.6318961e-03  -7.7138959e-03  -6.1271231e-03  -5.5675716e-03  -4.6992076e-03  -2.5365273e-03  -9.1772634e-04  -2.4377110e-04   5.6437745e-04   1.7977345e-03   2.1932620e-03   3.5246203e-03   4.8526105e-03   6.3435372e-03   7.9136342e-03   1.0600739e-02   1.0905588e-02   1.1111488e-02   1.2517951e-02   1.2314746e-02   1.0874870e-02   1.0601244e-02   1.0597301e-02   1.0804930e-02   1.2748231e-02   1.3557824e-02   1.3955593e-02   1.5448490e-02   1.5840607e-02   1.5045867e-02   1.5619178e-02   1.6742506e-02   1.6761015e-02   1.6012945e-02   1.5850278e-02   1.5930481e-02   1.5484919e-02   1.4758559e-02   1.4461786e-02   1.3866320e-02   1.2213887e-02   1.1303695e-02   1.0961077e-02   1.0435425e-02   9.7728042e-03   9.6047587e-03   9.3427828e-03   9.6626947e-03   1.0004896e-02   1.1694584e-02   1.2277183e-02   1.1981937e-02   1.0353751e-02   9.5752688e-03   8.5170344e-03   8.0526390e-03   7.8727502e-03   8.8340183e-03   8.6567358e-03   7.7928414e-03   7.9168298e-03   7.9296254e-03   8.5528194e-03   8.9035425e-03   8.9472905e-03   8.1139335e-03   9.4914062e-03   8.5637826e-03   8.4010829e-03   8.6218285e-03   9.2874886e-03   8.5391434e-03   1.0059663e-02   1.1310848e-02   1.1608909e-02   1.2386186e-02   1.2993553e-02   1.1913092e-02   1.0758154e-02   1.1144818e-02   1.0227764e-02   9.5412031e-03   9.3216946e-03   8.9896780e-03   7.7816181e-03   7.5413554e-03   7.0833546e-03   6.4240699e-03   5.8763916e-03   5.2740859e-03   3.7825115e-03   1.8976983e-03   7.6136996e-04  -1.7479310e-04  -1.9673988e-03  -2.0064230e-03  -2.9989564e-03  -3.7264154e-03  -3.7218766e-03  -3.1632785e-03  -3.6742888e-03  -4.3579783e-03  -5.6510547e-03  -6.9289284e-03  -7.4686831e-03  -8.4595112e-03  -8.1306623e-03  -7.9238605e-03  -8.6592639e-03  -9.4981666e-03  -1.0116783e-02  -1.0331022e-02  -1.0030273e-02  -9.2578172e-03  -8.9505144e-03  -9.4223476e-03  -9.9063194e-03  -1.0621905e-02  -1.0599575e-02  -9.7658848e-03  -7.6645560e-03  -5.4301526e-03  -4.0029233e-03  -4.1252214e-03  -2.7523201e-03  -2.2016267e-03  -2.3343552e-03  -2.0389494e-03   5.2551532e-04  -5.2945690e-04  -1.7842262e-04   1.3328091e-03   3.1375367e-03   2.7248829e-03   4.4597321e-03   4.3726489e-03   3.5515292e-03   3.5266477e-03   3.2885535e-03   2.8857988e-03   3.5917690e-03   4.1486289e-03   4.8404647e-03   7.2312692e-03   9.2273510e-03   1.0731365e-02   1.2290458e-02   1.2040758e-02   1.2088492e-02   1.2548008e-02   1.1156356e-02   1.1246417e-02   1.1180093e-02   1.1133126e-02   1.0855348e-02   1.2758333e-02   1.4572054e-02   1.6174423e-02   1.6207254e-02   1.6459147e-02   1.6644701e-02   1.6008529e-02   1.5675207e-02   1.5372193e-02   1.4792608e-02   1.3875330e-02   1.1900805e-02   1.0677797e-02   9.9732965e-03   8.8110977e-03   8.6345839e-03   8.4292543e-03   8.6137427e-03   8.8028705e-03   9.0785508e-03   8.7638366e-03   9.5330829e-03   1.1401819e-02   1.2562001e-02   1.5120021e-02   1.7285989e-02   1.8652239e-02   1.8830904e-02   1.9010615e-02   1.9001150e-02   1.9392109e-02   1.9703409e-02   2.0725777e-02   2.2837564e-02   2.5033800e-02   2.6814744e-02   2.8962408e-02   3.0367851e-02   3.1436263e-02   3.1952170e-02   3.2371525e-02   3.2891897e-02   3.3124492e-02   3.3965343e-02   3.4627217e-02   3.4404920e-02   3.2449607e-02   2.9570267e-02   2.5608717e-02   2.0619046e-02   1.6715323e-02   1.4333191e-02   1.1960491e-02   1.1073539e-02   1.0334127e-02   1.0037371e-02   9.3082065e-03   9.4094141e-03   8.4224381e-03   8.0002965e-03   7.4525466e-03   7.2620354e-03   6.8280609e-03   5.4522440e-03   4.1109300e-03   3.0030903e-03   1.6993318e-03   3.0977740e-04  -9.5183542e-04  -2.4723541e-03  -4.6677919e-03  -5.2883686e-03  -5.4244566e-03  -4.0984084e-03  -2.4899156e-03  -1.4508337e-03  -2.1897871e-03  -2.3381718e-03  -3.8733986e-03  -4.7211914e-03  -4.5812624e-03  -4.1065312e-03  -4.2047641e-03  -3.6043004e-03  -3.4690678e-03  -3.0674278e-03  -2.7569293e-03  -2.8608363e-03  -3.6025820e-03  -4.0710359e-03  -5.8480869e-03  -6.3415333e-03  -8.0299120e-03  -8.3886762e-03  -8.5982354e-03  -8.9759928e-03  -1.0134191e-02  -1.0243650e-02  -1.0629237e-02  -1.1419267e-02  -1.1129416e-02  -1.1427056e-02  -1.0896018e-02  -1.0314206e-02  -9.6564518e-03  -9.2107557e-03  -8.1960360e-03  -7.3487669e-03  -6.0299619e-03  -4.9007285e-03  -3.9697584e-03  -2.4929149e-03  -1.9001935e-03  -2.5414347e-03  -2.9143497e-03  -2.6388363e-03  -2.5789935e-03  -1.9387525e-03  -1.2694641e-03  -4.1421038e-04   7.3670523e-04   1.2244510e-03   1.9872117e-03   3.6162155e-03   4.9189622e-03   6.0089043e-03   7.2432739e-03   8.1315851e-03   7.9904767e-03   8.4615508e-03   8.2487409e-03   8.7996995e-03   8.5971749e-03   9.4353974e-03   9.2725242e-03   1.0341955e-02   9.9425159e-03   1.0425882e-02   1.0572055e-02   1.1054307e-02   1.0755220e-02   1.0675024e-02   1.0772663e-02   1.0120109e-02   9.8133027e-03   9.1619172e-03   8.2160842e-03   7.6506132e-03   8.0298801e-03   7.6497342e-03   7.0392606e-03   7.0473842e-03   6.9577733e-03   6.6138766e-03   5.9535391e-03   5.4277805e-03   4.8130462e-03   3.4178523e-03   1.8597906e-03   1.1598855e-03   3.0804563e-04  -4.1414478e-04  -7.0044176e-04  -7.4505809e-04  -1.9133446e-03  -2.9398745e-03  -3.8965886e-03  -5.0868823e-03  -6.4657835e-03  -7.1015128e-03  -7.2156376e-03  -7.5561322e-03  -8.1275429e-03  -8.6927690e-03  -8.9446397e-03  -1.0111888e-02  -1.1898107e-02  -1.3077240e-02  -1.4161140e-02  -1.5299473e-02  -1.6183479e-02  -1.7559819e-02  -1.7956374e-02  -1.8730394e-02  -1.9611768e-02  -1.9919666e-02  -1.8698451e-02  -1.8783550e-02  -1.7991207e-02  -1.6359603e-02  -1.4215362e-02  -1.1994613e-02  -8.9933273e-03  -5.3201776e-03  -1.8183788e-03   1.2333548e-03   5.4984362e-03   1.0376993e-02   1.5082164e-02   2.0931585e-02   2.7046157e-02   3.2132778e-02   3.7223228e-02   4.1301765e-02   4.4169960e-02   4.6348198e-02   4.7950528e-02   4.8991412e-02   4.9520947e-02   5.0026926e-02   5.2513240e-02   5.6009748e-02   5.9641932e-02   6.4360621e-02   6.8483278e-02   7.1500514e-02   7.4553356e-02   7.8007885e-02   8.1066125e-02   8.3758313e-02   8.5931444e-02   8.7170889e-02   8.6420472e-02   8.4829267e-02   8.3090525e-02   8.0345256e-02   7.6181991e-02   7.2316193e-02   6.8254553e-02   6.4634988e-02   6.1572900e-02   5.9488357e-02   5.6316854e-02   5.3588472e-02   5.1300385e-02   4.9728408e-02   4.8299080e-02   4.8286391e-02   4.9238030e-02   5.0290382e-02   5.0540608e-02   5.1388089e-02   5.2228353e-02   5.1531168e-02   5.0184868e-02   4.9524985e-02   4.7643880e-02   4.4999355e-02   4.2413725e-02   3.9074781e-02   3.5301196e-02   3.1447801e-02   2.7961699e-02   2.4838029e-02   2.1857000e-02   1.8321759e-02   1.4391098e-02   1.1432914e-02   7.8745356e-03   5.0758898e-03   1.8325033e-03   1.1228990e-04  -2.5599041e-03  -4.1571931e-03  -6.1509815e-03  -7.4578783e-03  -9.6915657e-03  -1.1939189e-02  -1.4232578e-02  -1.5893654e-02  -1.7428995e-02  -1.8744121e-02  -1.9651897e-02  -2.0004336e-02  -2.0387986e-02  -2.0377325e-02  -1.9715152e-02  -1.9089407e-02  -1.9138409e-02  -1.9017749e-02  -1.8745748e-02  -1.8898490e-02  -1.8812210e-02  -1.8177943e-02  -1.7305614e-02  -1.7219712e-02  -1.6337760e-02  -1.5295394e-02  -1.4463281e-02  -1.3842647e-02  -1.2828117e-02  -1.2133979e-02  -1.1299605e-02  -1.0660727e-02  -1.0454057e-02  -9.7711109e-03  -8.9996837e-03  -7.8441183e-03  -6.8871245e-03  -5.6625538e-03  -4.3903021e-03  -3.3332858e-03  -2.8979373e-03  -1.5729795e-03  -3.7240711e-04   2.6514604e-05   4.9341936e-04   9.2153398e-04   5.5576669e-04   2.4601017e-04   7.4188928e-04   1.0956030e-03   1.8049038e-03   2.8765343e-03   3.5274184e-03   4.2957724e-03   4.8646307e-03   5.2589148e-03   5.4133988e-03   5.8375783e-03   5.9424102e-03   6.2760410e-03   6.9935562e-03   7.7432180e-03   8.4136293e-03   8.9808683e-03   9.4816951e-03   9.5029260e-03   9.7002507e-03   9.9743900e-03   9.9232948e-03   1.0159186e-02   1.0300677e-02   1.0066606e-02   1.0159906e-02   1.0529619e-02   1.0857349e-02   1.1255446e-02   1.2049770e-02   1.2533780e-02   1.3236113e-02   1.3342794e-02   1.3207048e-02   1.2490410e-02   1.1617555e-02   1.0624526e-02   9.9912351e-03   1.0087001e-02   1.0738336e-02   1.1054047e-02   1.1055273e-02   1.0904613e-02   1.0237370e-02   8.7194479e-03   8.0954183e-03   7.5631640e-03   7.0436278e-03   6.2740135e-03   6.2541653e-03   5.7456515e-03   5.1105444e-03   4.5052393e-03   4.2919487e-03   3.5684264e-03   3.0818706e-03   2.8495820e-03   2.4796505e-03   2.0693237e-03   1.9198054e-03   1.8465255e-03   1.4609342e-03   1.2057686e-03   9.6526370e-04   7.6074076e-04   4.0778375e-04   7.2016579e-04   1.3115975e-03   1.8402408e-03   2.6087103e-03   3.8933326e-03   5.1084193e-03   5.9519055e-03   6.6644552e-03   6.9002115e-03   6.6355745e-03   6.5143052e-03   6.7065174e-03   7.0824333e-03   8.2085119e-03   9.2461188e-03   1.0021043e-02   1.0980619e-02   1.1506231e-02   1.1383049e-02   1.1287559e-02   1.0732073e-02   9.8643158e-03   9.7525472e-03   9.3963468e-03   9.0850302e-03   8.4142488e-03   7.6973412e-03   6.3926448e-03   5.3477434e-03   4.2879018e-03   3.8113510e-03   3.2574037e-03   2.4393376e-03   1.5121147e-03   5.4289912e-04   4.9525982e-05  -2.5469471e-04  -4.5221349e-04  -8.2748877e-04  -1.0590930e-03  -1.5533338e-03  -2.0498370e-03  -2.2507526e-03  -2.1923028e-03  -1.9929875e-03  -1.7806301e-03  -2.1510270e-03  -2.4176101e-03  -2.7520240e-03  -3.2110488e-03  -3.6068786e-03  -3.5591942e-03  -3.8372733e-03  -3.5302419e-03  -3.1281709e-03  -2.7380492e-03  -2.1201373e-03  -1.5715421e-03  -1.5527478e-03  -9.6084870e-04  -7.6421261e-04  -2.2457032e-06   6.7260032e-04   1.9909543e-03   1.7319269e-03   1.4016359e-03   1.0116690e-03   1.6045434e-03   2.2766900e-03   3.6749001e-03   5.7719003e-03   7.2938905e-03   8.1962563e-03   8.8683230e-03   8.9587812e-03   8.0036480e-03   7.1321392e-03   5.9880155e-03   3.5710537e-03   1.3938964e-03  -1.8167644e-04  -2.1673966e-03  -3.9291778e-03  -4.7095574e-03  -4.3818830e-03  -4.4237959e-03  -3.9870499e-03  -3.2263339e-03  -2.6370527e-03  -2.5307769e-03  -1.7136609e-03  -1.3867391e-03  -1.1503323e-03  -3.2642569e-04   8.0146062e-04   1.7936743e-03   3.2237903e-03   4.9282201e-03   6.4594144e-03   8.2204481e-03   1.0791540e-02   1.3485507e-02   1.5858427e-02   1.9441207e-02   2.2277841e-02   2.3652102e-02   2.4159741e-02   2.4577008e-02   2.3853907e-02   2.2354852e-02   2.0031735e-02   1.7409451e-02   1.5349145e-02   1.3316849e-02   1.0998281e-02   9.5707974e-03   9.1019558e-03   8.4421690e-03   7.8692750e-03   8.5359440e-03   9.2566382e-03   1.0646170e-02   1.2086307e-02   1.2505426e-02   1.2311056e-02   1.2564698e-02   1.1685813e-02   9.9253639e-03   8.4207409e-03   6.8819069e-03   5.2224247e-03   3.9441184e-03   2.0241684e-03   3.6760175e-04  -1.5186654e-03  -3.5787910e-03  -5.4851506e-03  -6.3116130e-03  -7.3243072e-03  -7.4116013e-03  -7.9692201e-03  -9.2478704e-03  -9.5914303e-03  -1.0435833e-02  -1.1315611e-02  -1.1940074e-02  -1.1363992e-02  -1.1588278e-02  -1.1274592e-02  -1.1373920e-02  -1.0606550e-02  -1.1007024e-02  -1.0841129e-02  -1.0487166e-02  -1.0027706e-02  -1.0263602e-02  -9.6027799e-03  -9.4713871e-03  -9.5674857e-03  -9.1922039e-03  -8.1826657e-03  -7.4502487e-03  -7.0384831e-03  -6.1077259e-03  -4.6903046e-03  -3.3519375e-03  -2.1137929e-03  -5.5881211e-04  -3.1216542e-05   6.2470610e-04   1.6047185e-03   2.7356732e-03   4.1826363e-03   6.6270409e-03   8.6781559e-03   1.0252584e-02   1.2576818e-02   1.5087728e-02   1.7780397e-02   2.0852804e-02   2.3237790e-02   2.5996892e-02   2.8084621e-02   3.0280517e-02   3.1173012e-02   3.3601108e-02   3.5333587e-02   3.7254177e-02   3.8533152e-02   3.9799223e-02   4.0563403e-02   4.0801928e-02   4.0487501e-02   4.0189314e-02   4.0489820e-02   3.9652239e-02   3.8483343e-02   3.7054500e-02   3.6882259e-02   3.5308377e-02   3.4086913e-02   3.3504220e-02   3.2783020e-02   3.0625027e-02   2.9451336e-02   2.7609567e-02   2.5956972e-02   2.5532951e-02   2.4939672e-02   2.4362285e-02   2.4740165e-02   2.4171182e-02   2.3079945e-02   2.2725094e-02   2.2550263e-02   2.1649887e-02   2.0873751e-02   2.1234011e-02   2.0425589e-02   1.9127974e-02   1.8108136e-02   1.7456920e-02   1.6352375e-02   1.4747774e-02   1.3417403e-02   1.2871022e-02   1.1828802e-02   9.8674752e-03   8.8886983e-03   7.9600073e-03   7.1185043e-03   6.2580057e-03   4.9361488e-03   5.0044100e-03   4.6317826e-03   4.0172575e-03   3.6126020e-03   3.5397667e-03   2.7698863e-03   2.8972855e-03   2.2483142e-03   1.8874218e-03   1.6489831e-03   7.3651350e-04  -5.6055366e-04  -1.2216398e-03  -1.7771611e-03  -2.0123850e-03  -1.7848433e-03  -1.7002093e-03  -2.3396311e-03  -2.8269544e-03  -3.6613796e-03  -4.4117237e-03  -5.2221965e-03  -5.1539587e-03  -5.4420684e-03  -5.1366221e-03  -5.8552948e-03  -5.7689412e-03  -6.1791292e-03  -6.3133001e-03  -6.7921201e-03  -6.6101294e-03  -7.2787953e-03  -6.9694043e-03  -6.8728517e-03  -6.9083477e-03  -6.6268112e-03  -5.9197341e-03  -6.3661399e-03  -6.7818402e-03  -6.7765714e-03  -6.9252697e-03  -7.5107032e-03  -7.0812244e-03  -6.3571781e-03  -5.9213904e-03  -5.7186995e-03  -5.1543042e-03  -5.0975873e-03  -5.2528840e-03  -5.0425257e-03  -4.3857005e-03  -3.9124480e-03  -3.1823947e-03  -2.7858197e-03  -2.5276872e-03  -2.3526890e-03  -1.7689870e-03  -1.7018408e-03  -1.2859061e-03  -1.0270314e-03  -8.5074106e-04  -8.0226730e-04  -6.0342526e-04  -2.3180106e-04  -7.2265723e-05   5.7455825e-04   6.1481402e-04   8.8449804e-04   1.0449982e-03   1.5233438e-03   1.5018084e-03   1.9550966e-03   2.1039946e-03   2.3530087e-03   2.3771160e-03   2.5090982e-03   2.7151642e-03   2.8953350e-03   2.8742645e-03   2.9014812e-03   3.0761080e-03   3.2105330e-03   3.0484140e-03   3.1472149e-03   3.1290981e-03   3.0105926e-03   3.0365100e-03   3.6310089e-03   3.6062864e-03   4.1210097e-03   4.2261604e-03   4.0713734e-03   3.7926751e-03   3.8539291e-03   3.8189766e-03   3.9152816e-03   3.6221428e-03   3.7813293e-03   3.6856133e-03   3.5737053e-03   3.6203288e-03   3.9950334e-03   3.9391829e-03   3.9328753e-03   3.9305675e-03   3.7855478e-03   3.6861076e-03   3.6974006e-03   3.7446753e-03   3.4869565e-03   3.6127204e-03   3.6930571e-03   3.2756796e-03   3.2132182e-03   3.1557644e-03   3.0004662e-03   3.0544578e-03   3.4548140e-03   3.5344560e-03   3.3053233e-03   2.9875402e-03   3.0046867e-03   3.1077313e-03   2.7548960e-03   2.5163484e-03   2.3639233e-03   1.8740921e-03   1.3420337e-03   1.2492306e-03   1.5125743e-03   1.4466420e-03   1.1900131e-03   1.0611938e-03   1.3265273e-03   1.1357710e-03   1.2993112e-03   1.5335934e-03   1.5909185e-03   1.0771122e-03   1.0619238e-03   7.5435831e-04   4.7716505e-04   5.2184478e-04   7.2190401e-04   6.7786379e-04   7.6962712e-04   9.3475051e-04   6.5402047e-04   8.1361058e-04   1.2540158e-03   1.4603117e-03   1.4707069e-03   1.5046814e-03   1.2154696e-03   9.3570096e-04   9.3952785e-04   1.3294491e-03   1.1808325e-03   1.2179968e-03   1.2638148e-03   1.0527446e-03   8.9451589e-04   1.2133284e-03   1.3928275e-03   1.3986950e-03   1.5385753e-03   1.3878825e-03   1.2832923e-03   1.4372559e-03   1.3083844e-03   1.5190249e-03   1.4740877e-03   1.5772548e-03   1.4924318e-03   1.3478919e-03   1.2343510e-03   1.0311134e-03   8.8489383e-04   9.3195191e-04   1.1963120e-03   7.4159951e-04   1.0690869e-03   1.3333221e-03   5.8988672e-04   1.8916288e-04   3.1597855e-04   1.6835628e-04  -2.2017973e-05   4.9455383e-04   6.9060667e-04   6.4162381e-04   6.4801160e-04   5.3937050e-04   4.0907373e-04   1.4472989e-04   9.1919023e-05  -2.0301179e-04  -1.8405642e-04  -4.5479932e-04  -5.6303668e-04  -6.5729321e-04  -1.5301600e-03
  -3.6741464e-03  -5.6070065e-03  -5.4187817e-03  -4.7736538e-03  -5.0177155e-03  -3.5693779e-03  -2.5566321e-03  -2.8662871e-03  -3.3384047e-03  -8.6971812e-04  -7.2015368e-04   1.3578579e-03   3.2639379e-03   4.3695418e-03   3.0079201e-03   2.6316367e-03   1.0763531e-03   8.4562278e-04   3.4295286e-04  -1.5270659e-04   2.4932181e-03   3.6573055e-03   4.0583925e-03   5.5121446e-03   7.6548990e-03   5.8552175e-03   6.9835115e-03   7.8798178e-03   8.1314718e-03   8.6324051e-03   1.0222975e-02   9.6032693e-03   1.0377850e-02   1.2851502e-02   1.3092026e-02   1.3862327e-02   1.5245318e-02   1.6272519e-02   1.5639625e-02   1.7150535e-02   1.8314397e-02   1.8839045e-02   1.7757977e-02   1.7866645e-02   1.6747321e-02   1.5504995e-02   1.4456119e-02   1.4270326e-02   1.2564659e-02   1.2150838e-02   1.2226113e-02   1.1540910e-02   1.1518878e-02   1.0930903e-02   8.8670405e-03   5.3007336e-03   2.9850799e-03   2.0051885e-03   1.4782533e-03   1.9542346e-03   2.0428783e-03   9.0004490e-04  -1.2797447e-03  -2.7526429e-03  -3.3512712e-03  -6.5071956e-04   2.1208453e-03   1.7851778e-03   1.6806262e-03   2.6821067e-03   2.6933027e-03   3.0245012e-03   5.3425869e-03   7.7833731e-03   9.3873128e-03   8.7797374e-03   8.3844724e-03   9.8660679e-03   1.1098480e-02   1.1855109e-02   1.3681389e-02   1.5111942e-02   1.6835294e-02   1.7516461e-02   1.7343386e-02   1.8031357e-02   1.8404113e-02   1.7207177e-02   1.8116596e-02   1.9910120e-02   1.8538397e-02   1.7890899e-02   1.8350962e-02   1.5697513e-02   1.2062746e-02   1.0834793e-02   1.0250148e-02   9.1217896e-03   9.5652029e-03   1.0666335e-02   1.1117648e-02   1.0785874e-02   8.7481862e-03   7.0475736e-03   4.5714834e-03   1.2007519e-03  -2.0825238e-03  -3.8419803e-03  -5.7216625e-03  -6.3974625e-03  -5.7398251e-03  -5.5859981e-03  -6.6757190e-03  -7.9010096e-03  -9.4078239e-03  -1.1966631e-02  -1.3895286e-02  -1.3279824e-02  -1.3190449e-02  -1.3091686e-02  -1.2106269e-02  -1.0856664e-02  -1.0898516e-02  -1.1281751e-02  -1.2760555e-02  -1.3276803e-02  -1.2967671e-02  -1.3365958e-02  -1.3157627e-02  -1.1990075e-02  -1.1890027e-02  -1.3428558e-02  -1.4281814e-02  -1.6159693e-02  -1.6336252e-02  -1.5951008e-02  -1.5643789e-02  -1.5777059e-02  -1.3629959e-02  -1.2251327e-02  -1.0337230e-02  -6.3726762e-03  -2.3502407e-03   1.3401981e-03   4.0572767e-03   5.4554704e-03   5.8012955e-03   6.9168201e-03   7.2706038e-03   7.0138155e-03   8.4873508e-03   9.0668505e-03   8.9774479e-03   9.1173151e-03   9.3141215e-03   8.2468595e-03   8.2539809e-03   9.3135359e-03   1.1543517e-02   1.4188096e-02   1.6499613e-02   2.0631460e-02   2.3588569e-02   2.5359731e-02   2.7730397e-02   3.1236288e-02   3.3248769e-02   3.6007700e-02   3.7012916e-02   4.1183505e-02   4.4864802e-02   4.7932747e-02   5.0516971e-02   5.4271195e-02   5.3772203e-02   5.3337925e-02   5.3046168e-02   5.2383120e-02   5.1680528e-02   5.1458618e-02   5.1439930e-02   5.0996964e-02   4.9221999e-02   4.6162569e-02   4.2066023e-02   3.6193008e-02   2.9545433e-02   2.5266146e-02   2.2150670e-02   2.0015335e-02   1.8655874e-02   1.8912963e-02   1.9020908e-02   1.8491897e-02   1.7267507e-02   1.8468508e-02   1.6406901e-02   1.3748660e-02   1.2388445e-02   1.2898960e-02   1.1872225e-02   1.2265793e-02   1.1961450e-02   1.2499017e-02   1.0285372e-02   9.1251234e-03   7.4187030e-03   5.9892131e-03   3.5309778e-03   2.2957071e-03  -4.9462842e-04  -1.6530962e-03  -3.0483096e-03  -4.5570656e-03  -3.4841979e-03  -4.4224914e-03  -5.9682024e-03  -5.9313945e-03  -5.2124875e-03  -7.0957092e-03  -7.2704486e-03  -6.8466783e-03  -6.7475481e-03  -6.3922261e-03  -6.3722582e-03  -5.0375127e-03  -2.4342527e-03  -1.0240187e-03  -7.5226129e-04   1.4783449e-04   2.0013213e-04   3.6011492e-04  -8.6660285e-04   2.0728942e-04   8.2777621e-04   2.4783187e-03   2.4052751e-03   3.8882570e-03   4.2156741e-03   5.0205796e-03   3.0794026e-03   2.4629367e-03   2.2675403e-03   2.3468888e-03   1.6455314e-03   2.2825426e-03   2.2581233e-03   2.0651287e-03   7.8447071e-04   9.6222645e-04   1.6931923e-03   7.3083619e-04  -5.7629154e-04  -1.3964989e-03  -1.9787931e-03  -3.3497736e-03  -3.7462738e-03  -2.4754851e-03  -4.3702841e-04   1.4222557e-04   1.9432530e-03   2.7431859e-03   2.3880683e-03   2.5063694e-03   4.7311032e-03   6.0804542e-03   8.7272282e-03   1.1124132e-02   1.0867464e-02   8.7224970e-03   8.1193672e-03   8.1548910e-03   7.8093502e-03   8.0034765e-03   1.0725965e-02   1.1865285e-02   1.2350949e-02   1.4238433e-02   1.6367782e-02   1.5743101e-02   1.5566264e-02   1.6218531e-02   1.4766922e-02   1.5252951e-02   1.4969096e-02   1.4068226e-02   1.2103985e-02   1.0965018e-02   8.5373880e-03   7.0338208e-03   7.2050225e-03   5.4948715e-03   6.2429366e-03   5.0362387e-03   3.5361419e-03   1.4356225e-03   2.0995313e-03   8.0802841e-04   1.1888806e-03   1.8311062e-03   6.9448395e-04   2.4189696e-03   1.9636679e-03  -2.3172807e-04  -4.5080798e-04   7.3903212e-04  -2.1703865e-03  -2.9199313e-03  -1.2990837e-03  -9.7631927e-04  -1.9611492e-03  -1.1187597e-03  -6.3431313e-04  -2.7194067e-03  -5.2787084e-03  -5.7052640e-03  -7.1965548e-03  -9.1589049e-03  -8.9803163e-03  -7.5371602e-03  -7.8554500e-03  -7.4080252e-03  -6.8774608e-03  -6.6445215e-03  -6.6758271e-03  -6.3565161e-03  -7.4311595e-03  -7.6604238e-03  -7.1451087e-03  -6.8071291e-03  -6.2989858e-03  -5.8215949e-03  -4.6509998e-03  -4.4640849e-03  -5.4490251e-03  -5.4492625e-03  -4.3016961e-03  -4.5801020e-03  -5.1904503e-03  -4.8054288e-03  -4.9027853e-03  -6.1823605e-03  -6.1153052e-03  -5.4767385e-03  -5.3127056e-03  -4.8945890e-03  -4.5834410e-03  -4.9942459e-03  -4.3781772e-03  -3.4528722e-03  -4.1430964e-03  -4.4771837e-03  -3.1197789e-03  -1.8940374e-03  -1.4194724e-03   1.2555627e-03   3.9050154e-03   7.4182781e-03   1.2654309e-02   1.9654238e-02   2.7821137e-02   4.0575106e-02   5.4536902e-02   7.0133931e-02   8.7499627e-02   1.0262930e-01   1.0815954e-01   1.0577547e-01   9.5321204e-02   7.8074150e-02   5.7637788e-02   4.0462753e-02   2.6015712e-02   1.4931969e-02   6.6264222e-03   9.1552267e-04  -4.4474414e-03  -8.9767788e-03  -1.2333568e-02  -1.3927042e-02  -1.5834333e-02  -1.7039031e-02  -1.7399977e-02  -1.7895341e-02  -1.9752478e-02  -2.0459474e-02  -2.0369671e-02  -1.9075641e-02  -1.7739944e-02  -1.5209392e-02  -1.2681382e-02  -8.7421621e-03  -4.7706922e-03  -9.9042476e-05   5.6789046e-03   1.3105543e-02   2.3458717e-02   3.5341587e-02   5.0100884e-02   6.4842826e-02   7.8973355e-02   8.8299552e-02   9.2292919e-02   8.9696378e-02   8.2712063e-02   7.0608835e-02   5.5852989e-02   4.2858788e-02   3.1416224e-02   2.0796510e-02   1.4591839e-02   1.1211382e-02   7.0800231e-03   4.4054111e-03   3.0775960e-03  -6.0855818e-04  -2.8342682e-03  -2.6678246e-03  -3.8068415e-03  -4.5202653e-03  -1.8920223e-03  -7.8814359e-04  -5.4002781e-05   1.9504145e-03   4.5526605e-03   4.7976361e-03   5.3966428e-03   6.4310530e-03   7.4728035e-03   7.2218467e-03   8.0821806e-03   9.2979767e-03   9.2723784e-03   7.0443385e-03   6.9052525e-03   7.8960058e-03   8.3281139e-03   8.1634410e-03   1.0187747e-02   1.1762928e-02   1.1823176e-02   1.1103511e-02   1.1439513e-02   9.9193821e-03   7.6735559e-03   6.1291559e-03   4.8937796e-03   3.9891018e-03   4.8053356e-03   5.3285614e-03   4.3750204e-03   3.6688739e-03   3.0322699e-03   2.2556011e-03   1.0353366e-03   9.1158414e-04   8.9821964e-04  -5.2524218e-05  -2.4771234e-03  -3.1654285e-03  -3.4467041e-03  -3.0136796e-03  -2.1826107e-03  -8.4815054e-05   6.2405313e-04   4.8433757e-04   2.7847896e-04  -1.8390814e-04  -2.2003224e-03  -3.6294527e-03  -4.9738126e-03  -6.8870371e-03  -8.7185490e-03  -8.2709306e-03  -7.8611564e-03  -7.5288941e-03  -5.9456589e-03  -4.5704954e-03  -3.8686735e-03  -4.5341169e-03  -4.9887323e-03  -6.9223356e-03  -8.3216166e-03  -7.2105396e-03  -4.8480065e-03  -2.9346431e-03  -7.4826471e-05   2.9021590e-03   4.4420817e-03   6.1208807e-03   7.8716994e-03   9.7169335e-03   1.3431074e-02   1.4708718e-02   1.5960546e-02   1.7206347e-02   1.8747630e-02   1.7850526e-02   1.7914406e-02   1.7232788e-02   1.6215688e-02   1.4424544e-02   1.1734242e-02   9.3114415e-03   6.1447230e-03   3.0791861e-03   1.4194837e-03  -8.3699832e-05  -1.6474030e-03  -1.2941505e-03  -2.5543428e-04  -9.3740539e-04  -1.2444123e-03  -1.5089362e-03  -2.3270111e-03  -2.2061967e-03  -1.9798996e-04   7.3133348e-04   2.5913607e-03   4.8752465e-03   5.6813260e-03   6.5898557e-03   8.5793101e-03   8.6748152e-03   8.4858300e-03   9.1303408e-03   8.4150960e-03   7.6209879e-03   6.5102431e-03   6.4105275e-03   5.6952239e-03   2.7408164e-03   1.0752671e-03   7.0453826e-04  -1.9886663e-03  -3.5536694e-03  -2.9387357e-03  -3.3812619e-03  -3.8372629e-03  -2.9175753e-03  -3.4803477e-03  -6.0186738e-03  -7.7091693e-03  -8.8554808e-03  -9.3297750e-03  -1.0593909e-02  -1.0046030e-02  -9.4431762e-03  -8.7629884e-03  -9.2881457e-03  -9.9776352e-03  -1.0848623e-02  -1.0924250e-02  -1.0389055e-02  -8.9772414e-03  -5.0084092e-03  -1.7201808e-03  -4.7705632e-04   1.8315429e-03   3.1418499e-03   4.8134829e-03   7.8032922e-03   1.0667418e-02   1.2066465e-02   1.5124945e-02   1.7336364e-02   1.8705461e-02   2.0175452e-02   2.1289148e-02   2.1772607e-02   2.2450513e-02   2.3223046e-02   2.4291974e-02   2.6293433e-02   2.7127466e-02   2.5472515e-02   2.5196044e-02   2.5875889e-02   2.5765563e-02   2.5894483e-02   2.7457298e-02   2.8538595e-02   2.8971877e-02   2.9001319e-02   3.0836356e-02   3.2357355e-02   3.6160811e-02   4.0752059e-02   4.7123064e-02   5.2819327e-02   5.9811313e-02   6.5804250e-02   7.0671005e-02   7.2281595e-02   7.2684583e-02   7.1325330e-02   6.6451565e-02   6.0796409e-02   5.5174032e-02   4.9972153e-02   4.4355271e-02   3.9511721e-02   3.3192151e-02   3.0045973e-02   2.4988520e-02   2.1183414e-02   1.8446524e-02   1.8421199e-02   1.6448028e-02   1.5891888e-02   1.4675255e-02   1.2243562e-02   9.2466118e-03   7.0036081e-03   4.3965448e-03   2.7592411e-03   3.9961521e-03   4.9562561e-03   3.9370179e-03   2.0289700e-03   3.1098747e-04  -1.9630531e-03  -3.7064244e-03  -4.8757225e-03  -3.5873700e-03  -2.2215555e-03  -2.7805628e-03  -3.6376981e-03  -4.0100382e-03  -4.5545322e-03  -5.3046929e-03  -6.7768423e-03  -7.2311611e-03  -8.3445154e-03  -8.5828991e-03  -9.0768070e-03  -8.7266882e-03  -8.7895157e-03  -8.5375685e-03  -9.7171364e-03  -1.0806937e-02  -1.1815657e-02  -1.3146429e-02  -1.3284315e-02  -1.2658959e-02  -1.2129469e-02  -1.1070052e-02  -1.0405850e-02  -1.0389542e-02  -9.9592675e-03  -1.0037599e-02  -1.1021258e-02  -1.0728853e-02  -1.0098811e-02  -1.1121808e-02  -1.1119286e-02  -9.6342665e-03  -8.8091487e-03  -8.4199496e-03  -7.5855292e-03  -7.1982000e-03  -7.5003049e-03  -7.5867618e-03  -7.2466111e-03  -8.9004511e-03  -8.9759631e-03  -9.2602447e-03  -8.5738943e-03  -7.6787435e-03  -5.9773337e-03  -5.7999604e-03  -5.0631484e-03  -6.0332981e-03  -6.6413193e-03  -6.2485656e-03  -7.7063291e-03  -9.0610709e-03  -9.1694344e-03  -1.0987655e-02  -1.2799312e-02  -1.1615943e-02  -1.2980596e-02  -1.3961010e-02  -1.4013011e-02  -1.3687993e-02  -1.5277651e-02  -1.4014032e-02  -1.2669738e-02  -1.1411352e-02  -9.9888795e-03  -7.8456343e-03  -6.3026827e-03  -4.5794354e-03  -1.3032246e-03   5.0639456e-03   2.0723251e-02   4.1258683e-02   5.0269558e-02   5.4953452e-02   5.5349549e-02   4.9429078e-02   3.9023047e-02   4.0842866e-02   4.4471252e-02   5.0566898e-02   5.3665814e-02   5.6079092e-02   5.7002727e-02   5.8751263e-02   5.8641661e-02   5.8306850e-02   5.7368970e-02   5.5148591e-02   5.1812095e-02   4.7885109e-02   4.3451872e-02   4.0753384e-02   3.7268431e-02   3.3912288e-02   2.9352436e-02   2.6899377e-02   2.4168305e-02   2.0843766e-02   1.7530877e-02   1.6180068e-02   1.3325453e-02   8.5467973e-03   4.7404582e-03   2.5042163e-03   7.0319683e-04  -1.3465036e-03  -1.8063472e-03  -1.3333147e-03  -2.7761675e-04   2.7847492e-03   7.4411878e-03   1.0338723e-02   1.5427633e-02   1.9183112e-02   2.3153484e-02   2.7200010e-02   3.5038108e-02   4.1244983e-02   5.0231385e-02   5.8144601e-02   6.5339867e-02   7.0941671e-02   7.6861706e-02   8.0042839e-02   8.1234370e-02   8.2290826e-02   8.1411425e-02   7.8078236e-02   7.4047023e-02   7.0429464e-02   6.4189529e-02   5.8627765e-02   5.1360871e-02   4.5191033e-02   3.8363410e-02   3.3308300e-02   2.6110097e-02   2.1794725e-02   1.6830917e-02   1.1521480e-02   7.1062179e-03   4.5401554e-03   1.0999228e-03  -2.7776301e-03  -5.8793103e-03  -8.3342057e-03  -1.0989601e-02  -1.3461650e-02  -1.5778872e-02  -1.8120402e-02  -2.0552501e-02  -2.3156868e-02  -2.5292398e-02  -2.5502081e-02  -2.6151555e-02  -2.5242910e-02  -2.3426681e-02  -2.0196399e-02  -1.7807835e-02  -1.4165717e-02  -1.2379163e-02  -9.7473193e-03  -7.5106866e-03  -4.4084356e-03  -7.8740717e-04   1.5364425e-03   2.9849969e-03   4.2112007e-03   3.5263798e-03   1.9822529e-03   7.7758594e-04  -8.9976036e-05   2.6468087e-04  -4.5830901e-06  -1.1297615e-03  -7.7016987e-04  -1.1588088e-03  -2.8170238e-03  -2.9851096e-03  -2.1481093e-03  -2.2087606e-03  -2.5616536e-03  -2.4437901e-03  -2.5176722e-03  -2.8707328e-03  -3.1286149e-03  -2.3920585e-03  -1.5414772e-03   3.7796561e-04   2.0143856e-03   2.8795828e-03   4.3393143e-03   4.7472739e-03   4.5495463e-03   7.4293178e-03   9.5170808e-03   1.1160146e-02   1.2943821e-02   1.3743125e-02   1.2469446e-02   1.1936303e-02   1.1988682e-02   1.3363217e-02   1.4437008e-02   1.3341665e-02   1.2225016e-02   1.0298354e-02   7.4687616e-03   4.4868773e-03   2.9343691e-03   1.9292821e-03   1.6316759e-04  -9.8138726e-04  -3.2029559e-04  -6.8208565e-04  -2.1902256e-03  -1.6467029e-03  -2.7690581e-03  -4.2928620e-03  -5.9604600e-03  -5.8705689e-03  -8.7325997e-03  -8.3614514e-03  -8.7176941e-03  -8.7402999e-03  -9.6367440e-03  -7.8297270e-03  -7.6125707e-03  -6.4574374e-03  -4.2968283e-03  -1.9714779e-03   4.7087073e-04   1.8831690e-03   3.1263529e-03   4.0087061e-03   3.7312646e-03   3.2114618e-03   3.9060517e-03   4.2810915e-03   5.4244243e-03   7.2242249e-03   8.8206342e-03   8.3029612e-03   8.2190611e-03   8.5574402e-03   9.0167447e-03   9.5146517e-03   1.0933246e-02   1.2280591e-02   1.1753687e-02   1.1479295e-02   1.1865560e-02   1.1707224e-02   1.0936333e-02   1.2014773e-02   1.4682417e-02   1.5074528e-02   1.6827869e-02   1.8977939e-02   2.0460371e-02   2.0998387e-02   2.2438877e-02   2.2377124e-02   2.1764063e-02   2.1222169e-02   2.0205038e-02   1.9986625e-02   2.1317105e-02   2.2349052e-02   2.2262150e-02   2.2083233e-02   2.1512829e-02   2.0055313e-02   1.8566795e-02   1.8442487e-02   1.7237035e-02   1.5134319e-02   1.4799591e-02   1.2582664e-02   1.2093529e-02   1.3063793e-02   1.3713044e-02   1.1843712e-02   1.2581081e-02   1.2042334e-02   1.0292312e-02   8.8334607e-03   8.6852330e-03   9.4503794e-03   8.9634257e-03   9.1369350e-03   9.6142973e-03   9.2937569e-03   8.6593533e-03   9.5684094e-03   1.0330501e-02   1.0522101e-02   1.1451531e-02   1.2223603e-02   1.3075884e-02   1.4534936e-02   1.6807166e-02   1.8123514e-02   1.8982492e-02   1.9435218e-02   2.0116259e-02   1.9281096e-02   1.8785761e-02   1.8280259e-02   1.5506334e-02   1.1949871e-02   1.0538110e-02   9.9246504e-03   8.8365750e-03   7.5727197e-03   6.9451838e-03   6.4398292e-03   4.7216852e-03   2.5324048e-03   2.5968401e-03   1.3821602e-03  -1.5089044e-04  -1.1855202e-03  -1.9923533e-03  -3.4102234e-03  -3.9844261e-03  -4.7971127e-03  -6.0727701e-03  -7.7698765e-03  -9.5608147e-03  -1.1205888e-02  -1.2267666e-02  -1.2612629e-02  -1.3845248e-02  -1.4674718e-02  -1.4830349e-02  -1.6932417e-02  -1.8974772e-02  -1.9172030e-02  -1.9604845e-02  -2.1568636e-02  -2.1251209e-02  -2.0574389e-02  -1.9198127e-02  -1.9056995e-02  -1.8861914e-02  -1.8141109e-02  -1.7567713e-02  -1.7652341e-02  -1.7671165e-02  -1.4558875e-02  -1.2779046e-02  -1.0903677e-02  -8.9984566e-03  -6.8464280e-03  -8.2109027e-03  -9.9905155e-03  -1.1152053e-02  -1.2924625e-02  -1.4136398e-02  -1.3973042e-02  -1.3697701e-02  -1.3757960e-02  -1.2149061e-02  -8.8770333e-03  -3.5067393e-03   5.1201252e-03   1.7740417e-02   3.6384925e-02   6.3109168e-02   9.9968448e-02   1.4789868e-01   2.0438289e-01   2.6230798e-01   3.1249541e-01   3.4509637e-01   3.5281317e-01   3.3416957e-01   2.9426136e-01   2.4282452e-01   1.8777435e-01   1.3747650e-01   9.7649068e-02   6.8999141e-02   4.8843815e-02   3.6855600e-02   2.9137438e-02   2.3354413e-02   1.7973775e-02   1.2515825e-02   7.6853272e-03   2.6721516e-03  -2.2321942e-03  -7.2517941e-03  -1.2983551e-02  -1.8319551e-02  -2.3167664e-02  -2.7657239e-02  -3.0406504e-02  -3.1270664e-02  -3.3216420e-02  -3.3567348e-02  -3.3651709e-02  -3.4279262e-02  -3.4470697e-02  -3.4292660e-02  -3.3928046e-02  -3.2949188e-02  -3.1829720e-02  -3.0641990e-02  -2.8360431e-02  -2.5733946e-02  -2.2775490e-02  -1.8610262e-02  -1.2624996e-02  -5.1752970e-03   2.9452375e-03   1.1696425e-02   2.1556505e-02   3.0685957e-02   3.8640624e-02   4.5431098e-02   5.0463168e-02   5.2723792e-02   5.1472947e-02   4.7476835e-02   4.2665743e-02   3.6253653e-02   3.0075612e-02   2.4454342e-02   1.8353399e-02   1.3327337e-02   9.5197214e-03   6.4599176e-03   3.5065381e-03   2.2250356e-03   5.3463556e-05  -7.6553463e-04  -2.4111060e-03  -1.9376584e-03  -1.1701041e-03  -3.6208797e-04  -3.2981062e-04   3.8176991e-04   5.6247492e-04   9.9230437e-04   6.7897100e-04   1.8239479e-03   2.1736770e-03   2.4307259e-03   2.6800345e-03   3.8156683e-03   3.5157703e-03   4.8683996e-03   5.4380553e-03   5.7418648e-03   6.3708629e-03   6.6354907e-03   5.5715046e-03   5.3783901e-03   5.5386105e-03   5.9816666e-03   6.3409504e-03   6.2879296e-03   6.4108042e-03   6.1442736e-03   5.6746881e-03   5.5770868e-03   5.4509392e-03   5.0933018e-03   4.7717417e-03   4.4064078e-03   4.1769486e-03   4.2214021e-03   3.6345335e-03   2.7961451e-03   1.2331456e-03  -2.1811752e-04  -4.2325799e-05   7.7980747e-04   9.6068402e-05  -3.4678267e-04  -1.4257714e-04  -2.6898567e-03  -5.3094066e-03  -5.0858573e-03  -4.1757805e-03  -4.4715519e-03  -4.6994481e-03  -4.2776196e-03  -2.7147597e-03  -8.4516649e-04   1.0834301e-03   4.2350214e-03   6.0602201e-03   6.0416829e-03   5.6154940e-03   6.9574987e-03   8.0703229e-03   7.5959120e-03   8.1187722e-03   9.3963350e-03   9.4772043e-03   1.0025144e-02   1.2436164e-02   1.3371601e-02   1.3963631e-02   1.3715888e-02   1.3522176e-02   1.4864720e-02   1.4408644e-02   1.2815539e-02   1.2003242e-02   1.0735322e-02   6.3259731e-03   5.5158110e-03   5.1526313e-03   3.0657495e-03   1.1712145e-03   1.1826046e-03   5.9464701e-04  -1.0843741e-03  -1.5519251e-03  -1.7478757e-03  -2.2602586e-03  -2.7772144e-03  -2.4636062e-03  -2.5556823e-03  -2.0753981e-03  -1.2801970e-03  -1.9317988e-03  -1.4547644e-03   2.6157291e-04   9.6242055e-04   2.9513863e-03   4.6465927e-03   5.4064624e-03   6.9278105e-03   7.8526320e-03   6.8548332e-03   6.8872982e-03   8.1487150e-03   8.6299970e-03   9.1785783e-03   9.6462328e-03   1.0274625e-02   9.2426602e-03   6.5841647e-03   5.3435559e-03   4.9978143e-03   3.3012595e-03   1.3571424e-03   8.1493784e-04  -3.2594765e-04  -2.2346863e-03  -2.4583242e-03  -2.1431221e-03  -2.6175059e-03  -2.5298532e-03  -1.5935020e-03  -1.9176279e-03  -1.5813339e-03  -1.0562429e-03  -1.0974553e-03  -1.6854057e-04   1.8028167e-03   3.7393152e-03   6.8591724e-03   1.0691551e-02   1.4224502e-02   1.8520460e-02   2.3143399e-02   2.7529189e-02   3.1421475e-02   3.5476585e-02   4.0298927e-02   4.5217650e-02   4.9932763e-02   5.4857561e-02   5.8688208e-02   6.0519062e-02   6.1625386e-02   6.2167796e-02   6.1688460e-02   6.1275707e-02   6.0605121e-02   5.7693164e-02   5.3390765e-02   4.8858439e-02   4.2176323e-02   3.3633448e-02   2.5581467e-02   1.8532888e-02   1.0707514e-02   3.8162108e-03  -1.4949820e-03  -6.2220724e-03  -1.0298132e-02  -1.3638975e-02  -1.6943511e-02  -1.9549755e-02  -2.1852733e-02  -2.4316311e-02  -2.5640534e-02  -2.6479346e-02  -2.7687185e-02  -2.7843705e-02  -2.7211476e-02  -2.6095621e-02  -2.3912444e-02  -2.1506710e-02  -1.9526793e-02  -1.7095536e-02  -1.5022408e-02  -1.3832989e-02  -1.1673956e-02  -9.2480466e-03  -7.5241974e-03  -5.4365618e-03  -1.9679702e-03   1.4316710e-03   6.3284512e-03   1.2514914e-02   1.8037463e-02   2.3985544e-02   2.9941734e-02   3.4851787e-02   3.8660401e-02   4.2695234e-02   4.5615544e-02   4.7059808e-02   4.7571474e-02   4.7809741e-02   4.7501695e-02   4.5850247e-02   4.3429568e-02   3.9954719e-02   3.5014092e-02   2.9414294e-02   2.3449589e-02   1.7753223e-02   1.2751427e-02   8.4268815e-03   5.1472015e-03   3.3399490e-03   2.3607744e-03   2.6915221e-03   3.7892949e-03   6.0449636e-03   8.8841090e-03   1.1354174e-02   1.2245388e-02   1.3117157e-02   1.3217902e-02   1.3497064e-02   1.5325771e-02   1.8699318e-02   2.1459125e-02   2.3639195e-02   2.4315652e-02   2.3791261e-02   2.3596164e-02   2.3548552e-02   2.2445289e-02   2.1624412e-02   2.0497587e-02   1.8287439e-02   1.5777546e-02   1.3804331e-02   1.2139922e-02   1.0566095e-02   8.0449892e-03   5.5527254e-03   3.9301454e-03   3.4066833e-03   4.5989217e-04  -8.9179599e-04  -2.0192055e-03  -4.1469978e-03  -7.4286825e-03  -9.0814022e-03  -1.0674544e-02  -1.2229204e-02  -1.1074738e-02  -1.1557401e-02  -1.1794779e-02  -1.1347850e-02  -1.1672199e-02  -1.4347016e-02  -1.4381583e-02  -1.2570991e-02  -1.3350488e-02  -1.1428714e-02  -9.8317317e-03  -8.6185196e-03  -6.7562667e-03  -4.4452700e-03  -3.6460089e-03  -1.7368155e-03  -1.1022743e-05   4.9326497e-04   3.3633421e-03   6.2056723e-03   9.3720206e-03   1.4019054e-02   1.8585194e-02   2.1628243e-02   2.5934113e-02   2.9111640e-02   3.2229278e-02   3.6009491e-02   3.9883671e-02   4.2290975e-02   4.5319051e-02   4.8110766e-02   4.9070050e-02   4.9572093e-02   4.9645956e-02   4.7986924e-02   4.4006085e-02   3.9829666e-02   3.3809019e-02   2.7846243e-02   2.2661337e-02   1.7189749e-02   1.1765457e-02   7.0731346e-03   1.5523091e-03  -3.2658538e-03  -7.7996818e-03  -1.1825008e-02  -1.3689191e-02  -1.3952568e-02  -1.4552889e-02  -1.5198627e-02  -1.4674486e-02  -1.4430743e-02  -1.5317743e-02  -1.5282208e-02  -1.4167535e-02  -1.3076881e-02  -1.2080518e-02  -1.0631677e-02  -8.4424622e-03  -6.0881452e-03  -4.8813291e-03  -4.0278470e-03  -1.1500684e-03   5.4783590e-04   1.4283931e-03   2.9623452e-03   6.0859758e-03   6.6629508e-03   7.0984358e-03   8.0430154e-03   1.1179058e-02   1.0438285e-02   1.1824012e-02   1.3277275e-02   1.5037895e-02   1.4862365e-02   1.6090906e-02   1.5057306e-02   1.3574930e-02   1.3737492e-02   1.3891749e-02   1.4292714e-02   1.6822763e-02   1.9158302e-02   1.8364831e-02   1.7928267e-02   1.7896186e-02   1.7159572e-02   1.6865424e-02   1.7020175e-02   1.6989809e-02   1.7209219e-02   1.6984044e-02   1.6812117e-02   1.7639071e-02   1.7905040e-02   1.7609198e-02   1.7246320e-02   1.6523732e-02   1.6026812e-02   1.5515703e-02   1.5614355e-02   1.5744933e-02   1.5085751e-02   1.3480089e-02   1.3238617e-02   1.1597278e-02   1.0821080e-02   1.1140508e-02   1.1588902e-02   1.0481283e-02   1.1303379e-02   1.0607933e-02   1.0617466e-02   1.0627659e-02   9.7583950e-03   9.2682758e-03   9.6502223e-03   8.5230469e-03   7.9600424e-03   1.0019771e-02   1.0478201e-02   1.1453064e-02   1.1961661e-02   1.2278912e-02   1.1104451e-02   1.0854344e-02   1.1258145e-02   1.2599781e-02   1.3401091e-02   1.4719151e-02   1.5138151e-02   1.4074014e-02   1.3316612e-02   1.2530472e-02   1.1054342e-02   9.6184960e-03   7.5371716e-03   5.1260267e-03   3.8420762e-03   3.7768999e-03   4.5815091e-03   5.5894017e-03   6.6225662e-03   6.3848649e-03   3.8276481e-03   3.0106175e-03   1.7343598e-03   9.6262216e-05   1.9807255e-04   1.1319452e-03  -2.2449835e-03  -3.4291220e-03  -2.8388101e-03  -4.9930955e-03  -6.8319194e-03  -5.5085190e-03  -5.7933948e-03  -7.3410619e-03  -7.7426673e-03  -6.8680970e-03  -7.3367941e-03  -7.3997893e-03  -7.2329074e-03  -7.3054054e-03  -8.5046275e-03  -9.6375090e-03  -1.0800342e-02  -1.1752152e-02  -1.1817061e-02  -1.1234802e-02  -1.0232273e-02  -1.0200761e-02  -1.0735188e-02  -1.0527445e-02  -1.0876657e-02  -1.0308683e-02  -8.4682471e-03  -6.7040847e-03  -5.9807235e-03  -3.8175035e-03  -4.2106203e-03  -2.4487574e-03  -1.9502122e-03  -1.6044786e-03  -2.4273668e-03  -6.7476503e-05  -2.2078284e-03  -8.2897851e-04   1.6148525e-03   2.4050394e-03   2.5527956e-03   3.8168532e-03   3.4519421e-03   3.6178964e-03   5.3851225e-03   6.1487288e-03   8.2794123e-03   1.0050800e-02   1.1014793e-02   1.2737500e-02   1.3838124e-02   1.4940199e-02   1.6406094e-02   1.7432265e-02   1.7313672e-02   1.7265736e-02   1.6741100e-02   1.5007621e-02   1.4023616e-02   1.4243548e-02   1.6501739e-02   1.7469874e-02   1.9598867e-02   2.1648689e-02   2.1586238e-02   2.0294982e-02   2.0845844e-02   2.0971316e-02   1.8855600e-02   1.7037770e-02   1.5149252e-02   1.3542877e-02   1.2095388e-02   1.0740711e-02   9.5038167e-03   8.8876905e-03   8.0828267e-03   8.5253582e-03   1.0221643e-02   1.2145331e-02   1.3440041e-02   1.4934718e-02   1.6979468e-02   1.7643977e-02   1.8585155e-02   1.9940613e-02   2.1307916e-02   2.1092419e-02   2.1178553e-02   2.3553662e-02   2.4416231e-02   2.5682883e-02   2.8044754e-02   3.0834962e-02   3.2091932e-02   3.4570327e-02   3.6139067e-02   3.7067566e-02   3.7998580e-02   3.8158977e-02   3.8299423e-02   3.8595637e-02   3.7005493e-02   3.6869926e-02   3.7268728e-02   3.6091852e-02   3.3661712e-02   3.1443481e-02   2.6617709e-02   2.3483849e-02   2.1217751e-02   1.8635960e-02   1.7790466e-02   1.7793831e-02   1.4777317e-02   1.2888318e-02   1.1451651e-02   9.3933848e-03   8.4420146e-03   7.7090766e-03   5.9435612e-03   4.8775162e-03   3.6471735e-03   2.3914594e-03   1.5625601e-03   1.2439491e-03   6.6277167e-04  -3.0946637e-04  -1.9915970e-03  -4.1291710e-03  -5.0452739e-03  -5.9233245e-03  -5.3106448e-03  -4.3018508e-03  -3.2833521e-03  -3.4760073e-03  -3.4034809e-03  -5.0903594e-03  -6.0421518e-03  -6.2225444e-03  -6.1207130e-03  -5.7181321e-03  -4.3513315e-03  -3.7008847e-03  -3.4024274e-03  -2.7105756e-03  -3.0742806e-03  -4.3005013e-03  -6.2348924e-03  -6.9352984e-03  -8.9099341e-03  -1.0117124e-02  -1.0815159e-02  -9.9468817e-03  -1.0642399e-02  -1.0839441e-02  -1.0981509e-02  -1.1094596e-02  -1.1561003e-02  -1.1168979e-02  -1.1329602e-02  -1.1972780e-02  -1.2071252e-02  -1.1852177e-02  -1.1430089e-02  -1.0558422e-02  -9.2185912e-03  -6.9371876e-03  -5.6161588e-03  -5.3993575e-03  -3.5652944e-03  -2.2032715e-03  -2.6512801e-03  -2.7747791e-03  -1.7189126e-03  -2.0519856e-03  -1.9865705e-03  -1.7263088e-03  -1.9502609e-03  -2.0321766e-03   3.7205553e-04   3.9555620e-03   5.2283421e-03   7.3937853e-03   8.9499550e-03   7.8831955e-03   6.0425300e-03   7.6308393e-03   8.9694686e-03   9.4372222e-03   9.6654983e-03   9.4676303e-03   9.3422967e-03   8.8431424e-03   9.9372708e-03   1.0928335e-02   1.2308651e-02   1.2491488e-02   1.2965399e-02   1.2598554e-02   1.2971169e-02   1.3008392e-02   1.3157343e-02   1.2945623e-02   1.2277066e-02   1.1964624e-02   1.1398367e-02   1.1161959e-02   1.0593764e-02   1.0896672e-02   1.0354382e-02   1.0069220e-02   8.6962961e-03   8.0127694e-03   6.6656030e-03   5.1525465e-03   3.6198563e-03   3.0514346e-03   2.5348258e-03   1.8837686e-03   9.6871089e-04   3.6730342e-04  -5.4358755e-04  -1.5962178e-03  -2.6631882e-03  -3.5050811e-03  -4.7645876e-03  -5.5395752e-03  -6.5048357e-03  -6.7570133e-03  -7.3148476e-03  -8.3722660e-03  -9.6975985e-03  -1.0749654e-02  -1.2030495e-02  -1.3266378e-02  -1.4249038e-02  -1.5808014e-02  -1.7331837e-02  -1.8951112e-02  -2.0381769e-02  -2.1286231e-02  -2.1965799e-02  -2.2796678e-02  -2.2958144e-02  -2.2830042e-02  -2.2799452e-02  -2.1571832e-02  -2.0104816e-02  -1.9379133e-02  -1.7309489e-02  -1.4157608e-02  -1.1267865e-02  -6.8410425e-03  -1.6633416e-03   3.4126297e-03   8.2100057e-03   1.3929516e-02   1.9437421e-02   2.5572631e-02   3.1165417e-02   3.6998118e-02   4.2161150e-02   4.6918538e-02   5.0696907e-02   5.3499720e-02   5.5132624e-02   5.6832467e-02   5.8389082e-02   5.9790129e-02   6.3316685e-02   6.7621609e-02   7.1718129e-02   7.6467159e-02   8.1408768e-02   8.5592484e-02   8.9760501e-02   9.4341603e-02   9.7543866e-02   1.0101969e-01   1.0255922e-01   1.0299353e-01   1.0191157e-01   1.0036739e-01   9.7430014e-02   9.4075544e-02   8.9684554e-02   8.5131052e-02   8.0744934e-02   7.6955408e-02   7.4056708e-02   7.0700726e-02   6.7037171e-02   6.3106612e-02   5.9957416e-02   5.7883862e-02   5.7612853e-02   5.8396739e-02   5.9611249e-02   6.0519136e-02   6.0199119e-02   6.0339096e-02   5.9811594e-02   5.8624522e-02   5.6837753e-02   5.5918477e-02   5.3836377e-02   5.1528285e-02   4.8922699e-02   4.5803458e-02   4.1542648e-02   3.7293197e-02   3.3261992e-02   2.9347143e-02   2.5318148e-02   2.1477049e-02   1.7344958e-02   1.3396058e-02   9.7667597e-03   6.3985782e-03   2.9120902e-03   4.3922227e-04  -2.3797178e-03  -5.1010672e-03  -7.8973910e-03  -1.0303753e-02  -1.2806332e-02  -1.5190953e-02  -1.8018802e-02  -1.9786545e-02  -2.1282595e-02  -2.2678937e-02  -2.3198941e-02  -2.2825625e-02  -2.3276417e-02  -2.3697302e-02  -2.3398698e-02  -2.3226117e-02  -2.3401447e-02  -2.3011720e-02  -2.2202419e-02  -2.2252586e-02  -2.1856715e-02  -2.1138222e-02  -2.0960907e-02  -2.0347878e-02  -1.9198023e-02  -1.8643406e-02  -1.7935530e-02  -1.6043145e-02  -1.4683854e-02  -1.3584447e-02  -1.2357682e-02  -1.1132162e-02  -1.0719999e-02  -1.0324605e-02  -9.7139925e-03  -8.5392352e-03  -7.6662349e-03  -6.4924463e-03  -4.8293273e-03  -3.7374654e-03  -2.6359048e-03  -1.4958769e-03  -4.3043204e-04   8.7210965e-05   6.1805167e-04   6.2477009e-04   8.3953559e-04   8.2310864e-04   9.9323075e-04   1.8320839e-03   2.7844042e-03   3.5628429e-03   4.5197289e-03   4.8567439e-03   5.6169194e-03   5.2990421e-03   5.1444952e-03   5.5671958e-03   6.4973726e-03   6.6476130e-03   7.6078704e-03   8.5084096e-03   8.9210571e-03   9.2338868e-03   9.7442824e-03   9.9574853e-03   1.0335406e-02   1.1127609e-02   1.1187158e-02   1.1430244e-02   1.2080161e-02   1.2540865e-02   1.2889999e-02   1.3586143e-02   1.3392173e-02   1.3619295e-02   1.4011151e-02   1.4073641e-02   1.4476224e-02   1.5396290e-02   1.5022409e-02   1.4380020e-02   1.3435295e-02   1.2466813e-02   1.1749032e-02   1.1859081e-02   1.2381250e-02   1.2819288e-02   1.2745994e-02   1.2063978e-02   1.1195236e-02   1.0072528e-02   9.2764898e-03   8.6113729e-03   8.3316402e-03   8.1417430e-03   7.4704451e-03   6.6152839e-03   6.3128278e-03   5.9570395e-03   5.3264645e-03   5.1459094e-03   4.4967166e-03   3.8275672e-03   2.9251921e-03   2.3859171e-03   2.4011903e-03   2.6066737e-03   2.0546815e-03   1.8714948e-03   1.7805360e-03   1.4176248e-03   1.1403809e-03   1.9983144e-03   2.6275308e-03   2.5532727e-03   2.5840160e-03   3.3023469e-03   3.5747656e-03   4.1594864e-03   4.9294722e-03   5.8968286e-03   7.0489956e-03   7.8947360e-03   8.6269308e-03   1.0239762e-02   1.0841240e-02   1.0878013e-02   1.1432311e-02   1.1462959e-02   1.1639801e-02   1.2164103e-02   1.1980863e-02   1.1430892e-02   1.1535994e-02   1.0509192e-02   9.5184508e-03   9.6868200e-03   9.7342710e-03   8.6534046e-03   8.3719035e-03   7.6071848e-03   6.5999941e-03   5.0772238e-03   4.2234737e-03   2.8827083e-03   1.9699577e-03   6.9823012e-04   2.1535871e-04  -4.5320022e-04  -1.1192670e-03  -1.4553481e-03  -1.5701058e-03  -2.0482579e-03  -1.7869740e-03  -1.7426489e-03  -2.2723322e-03  -2.4496131e-03  -2.0752285e-03  -3.0261992e-03  -3.7879124e-03  -3.8348870e-03  -3.6641337e-03  -3.9776084e-03  -3.7768450e-03  -2.9105942e-03  -2.1362776e-03  -2.3735025e-03  -2.6353080e-03  -2.5890114e-03  -2.0906553e-03  -2.5020954e-03  -2.1308022e-03  -1.7142488e-03  -1.3205557e-03  -4.5412891e-04   1.2141892e-03   1.8626111e-03   2.5561325e-03   3.2957757e-03   3.0516533e-03   3.3166229e-03   4.4746305e-03   6.0724175e-03   8.2185759e-03   1.0187560e-02   1.0469254e-02   1.0357880e-02   9.3374075e-03   7.5854594e-03   5.1775609e-03   3.0377024e-03   6.9505330e-04  -1.3914602e-03  -3.1846146e-03  -4.3484825e-03  -5.0601566e-03  -5.0913398e-03  -4.7973041e-03  -4.7500975e-03  -4.4055461e-03  -4.3558308e-03  -3.4930796e-03  -2.7263180e-03  -8.8563364e-04  -2.4692602e-04   9.9786914e-04   1.6837262e-03   2.9557834e-03   3.2049347e-03   5.3170544e-03   7.9731261e-03   1.1019860e-02   1.3596570e-02   1.7217978e-02   2.0463672e-02   2.3429119e-02   2.5433071e-02   2.7557542e-02   2.8639272e-02   2.8402389e-02   2.7147545e-02   2.5959699e-02   2.3560672e-02   2.0555776e-02   1.7502682e-02   1.4752517e-02   1.1896052e-02   1.0715824e-02   1.0364161e-02   1.0734418e-02   1.1412382e-02   1.2167866e-02   1.2658217e-02   1.2866180e-02   1.2768937e-02   1.2655291e-02   1.2571336e-02   1.2229308e-02   1.1297508e-02   1.0744865e-02   9.7832662e-03   8.1260203e-03   5.8389100e-03   4.0309920e-03   7.5608502e-04  -1.1748570e-03  -2.8229036e-03  -3.8698618e-03  -5.2651479e-03  -5.7190108e-03  -6.9203170e-03  -8.3125055e-03  -9.7585119e-03  -1.0996960e-02  -1.1645337e-02  -1.2936086e-02  -1.3603026e-02  -1.4110143e-02  -1.4046437e-02  -1.4235853e-02  -1.4367073e-02  -1.4296810e-02  -1.3520846e-02  -1.2962112e-02  -1.2410652e-02  -1.1586649e-02  -1.1070470e-02  -1.1241151e-02  -1.1323351e-02  -1.1467469e-02  -1.1431202e-02  -1.1456644e-02  -1.0775254e-02  -9.7785137e-03  -8.9684587e-03  -7.8729455e-03  -5.6646903e-03  -4.1138739e-03  -3.0031351e-03  -1.0801584e-03   8.9691667e-04   1.6686812e-03   3.3103040e-03   5.2183689e-03   7.0237903e-03   9.3039446e-03   1.2084884e-02   1.4267492e-02   1.6951178e-02   2.0247199e-02   2.2633609e-02   2.5234047e-02   2.8663838e-02   3.1770266e-02   3.3761897e-02   3.6207933e-02   3.7784512e-02   3.8953372e-02   4.0243827e-02   4.2101741e-02   4.3958780e-02   4.5878646e-02   4.6521391e-02   4.7113561e-02   4.7180817e-02   4.6815696e-02   4.6820230e-02   4.7042283e-02   4.6351285e-02   4.5236651e-02   4.3996310e-02   4.2469535e-02   4.1103345e-02   3.9302058e-02   3.7404992e-02   3.6189582e-02   3.4960619e-02   3.2954003e-02   3.2023332e-02   3.0805736e-02   2.9698130e-02   2.8463969e-02   2.8788205e-02   2.8594684e-02   2.9137533e-02   2.8992965e-02   2.9107243e-02   2.7501184e-02   2.6768202e-02   2.6186782e-02   2.4743062e-02   2.3363114e-02   2.2720342e-02   2.1518930e-02   1.9135221e-02   1.7723382e-02   1.6431201e-02   1.5039063e-02   1.3066502e-02   1.1772244e-02   1.0251502e-02   8.8144073e-03   7.5599400e-03   6.6770025e-03   5.9146950e-03   5.4497255e-03   5.2105480e-03   5.0244829e-03   4.4385146e-03   3.9303680e-03   3.5676663e-03   2.9506176e-03   1.8333045e-03   1.3932425e-03   8.7855209e-04  -4.1157184e-04  -1.8865024e-03  -2.3290698e-03  -2.6202421e-03  -2.5832230e-03  -2.5126081e-03  -2.2330501e-03  -2.3609813e-03  -3.4920652e-03  -4.7341989e-03  -4.8683695e-03  -5.3431166e-03  -6.2116306e-03  -6.5133968e-03  -6.8444456e-03  -7.3698951e-03  -7.8992484e-03  -8.0328772e-03  -7.8374732e-03  -7.7810715e-03  -8.0887984e-03  -8.1252625e-03  -8.3489833e-03  -8.6820861e-03  -8.1760652e-03  -8.3147089e-03  -8.7826316e-03  -8.9815735e-03  -8.9330530e-03  -9.0774447e-03  -8.4328867e-03  -7.3772491e-03  -6.5061086e-03  -6.0886921e-03  -5.8437230e-03  -5.6429328e-03  -5.8720031e-03  -5.9026915e-03  -5.9630501e-03  -5.2636993e-03  -4.9230869e-03  -4.2060266e-03  -3.7024992e-03  -2.8544011e-03  -2.5693719e-03  -2.4766533e-03  -2.5959243e-03  -2.4436560e-03  -2.0491878e-03  -1.9407310e-03  -1.3807285e-03  -6.0407683e-04   2.3480817e-05   1.9220539e-04   5.7747719e-04   7.8221820e-04   1.1197119e-03   1.1622601e-03   1.6586158e-03   1.8686832e-03   2.3125106e-03   2.2125486e-03   2.6211116e-03   3.1730073e-03   3.4883913e-03   3.6171577e-03   4.0162801e-03   3.8762074e-03   3.4658262e-03   3.2405051e-03   3.2946501e-03   3.4986664e-03   3.6532893e-03   3.9309281e-03   4.2315443e-03   4.3379148e-03   4.1623003e-03   4.1264110e-03   4.2386168e-03   4.4421375e-03   4.6702338e-03   4.8269217e-03   5.1155612e-03   5.0233447e-03   4.7415796e-03   4.7303069e-03   4.7101016e-03   4.6982591e-03   4.5585672e-03   4.6153083e-03   4.4877144e-03   4.3983279e-03   4.4033517e-03   4.7210719e-03   4.8543575e-03   4.3848327e-03   4.4776524e-03   4.2653260e-03   3.7841588e-03   3.5490879e-03   3.9329604e-03   3.5659646e-03   3.4179903e-03   3.3008188e-03   3.0745626e-03   2.6869851e-03   2.8422370e-03   3.0780603e-03   2.8501963e-03   3.2662182e-03   3.4997806e-03   3.1934626e-03   2.9235016e-03   3.0458899e-03   2.3720931e-03   2.1901746e-03   2.2242543e-03   2.1081833e-03   1.9013314e-03   2.0836490e-03   1.9264455e-03   1.6880754e-03   1.6150566e-03   1.6986337e-03   1.2677235e-03   1.1954358e-03   1.4066650e-03   1.2937877e-03   1.0772409e-03   1.1601188e-03   1.0110316e-03   6.3208554e-04   8.0938204e-04   1.0528191e-03   1.0769524e-03   1.1680877e-03   1.4094596e-03   1.4060764e-03   1.1375389e-03   1.5603941e-03   1.7769206e-03   1.8804818e-03   1.7206585e-03   2.0430636e-03   1.6039114e-03   1.5471176e-03   1.5784841e-03   1.6723531e-03   1.5845148e-03   1.5464656e-03   1.4421408e-03   1.1931687e-03   1.2662639e-03   1.0629743e-03   1.3537926e-03   1.3859557e-03   1.7832143e-03   1.5934032e-03   1.6933888e-03   1.8164886e-03   1.6898300e-03   1.2870386e-03   1.4569721e-03   1.8498325e-03   1.7349364e-03   1.8583780e-03   1.7123456e-03   1.6702460e-03   1.3475490e-03   1.1861186e-03   1.1169011e-03   1.2043789e-03   8.9797236e-04   4.7064905e-04   3.7690209e-04   2.2679061e-04   1.9282495e-04   2.2880089e-04   2.8346046e-04   3.5377589e-04   3.7737355e-04  -8.7253639e-05  -4.5974013e-04  -4.4461456e-04  -8.8224309e-04  -9.9296503e-04  -4.9266425e-04   1.5406740e-04   3.4795444e-04   2.2984553e-04   2.2519338e-04  -1.5572505e-03
  -8.6733147e-03  -8.9211283e-03  -8.4934950e-03  -6.6637910e-03  -4.8221400e-03  -4.0772399e-03  -2.9040597e-03  -1.1276379e-03  -2.1717507e-03  -1.7176066e-03  -2.2471364e-04   2.6784315e-05   1.4145528e-03   3.9618700e-03   4.6672449e-03   5.1331618e-03   6.1178491e-03   5.7971193e-03   6.2665124e-03   6.2816912e-03   6.8119132e-03   8.5045728e-03   1.0744622e-02   1.0993805e-02   1.1673885e-02   1.0911873e-02   8.5797835e-03   6.5810559e-03   8.5389426e-03   9.7393995e-03   1.1918214e-02   1.4573502e-02   1.6084516e-02   1.4532350e-02   1.5530110e-02   1.5551250e-02   1.5536966e-02   1.6580444e-02   1.7061273e-02   1.6591271e-02   1.7556163e-02   1.7690064e-02   1.6983834e-02   1.6349491e-02   1.4976502e-02   1.3196706e-02   1.2149868e-02   1.1713084e-02   1.1085886e-02   9.7899424e-03   7.0377305e-03   6.3205067e-03   5.0766490e-03   3.9842311e-03   3.6206242e-03   4.3099152e-03   2.8329031e-03   1.6468028e-03   6.4542251e-04  -7.1319740e-04  -7.1536045e-04  -7.9688881e-05  -3.1802728e-04   8.9643849e-07   2.3533967e-03   1.8859283e-03   3.9122660e-04  -9.9128948e-04  -1.8816251e-04  -1.7671195e-03  -2.7951635e-03  -3.5021767e-03  -1.8387917e-03  -7.8603585e-04   1.0953301e-03   3.7015878e-03   7.2362143e-03   1.0387612e-02   1.1294590e-02   1.2768602e-02   1.4550079e-02   1.4256109e-02   1.3797148e-02   1.4004790e-02   1.5199482e-02   1.5810998e-02   1.7886187e-02   1.9455583e-02   2.0693075e-02   2.0876150e-02   2.1084988e-02   1.8872657e-02   1.8288138e-02   1.6842442e-02   1.5637776e-02   1.5164044e-02   1.6015407e-02   1.3757255e-02   1.1613376e-02   1.0376415e-02   7.2097120e-03   4.7723700e-03   3.7675561e-03   2.3784694e-03  -7.1262824e-04  -1.7993115e-03  -3.2376683e-03  -4.2592576e-03  -3.2987757e-03  -3.1267654e-03  -4.9478044e-03  -7.5863855e-03  -1.0409079e-02  -1.3670432e-02  -1.5351445e-02  -1.3446311e-02  -1.2338317e-02  -1.3029304e-02  -1.4097909e-02  -1.3358435e-02  -1.4387971e-02  -1.3890585e-02  -1.2018719e-02  -1.0630424e-02  -1.1236343e-02  -1.2353382e-02  -1.4680619e-02  -1.5570604e-02  -1.4400797e-02  -1.3199102e-02  -1.2151259e-02  -9.7846037e-03  -8.5435805e-03  -8.1906654e-03  -7.4005797e-03  -6.1580876e-03  -5.2913529e-03  -5.6704969e-03  -5.8156099e-03  -4.6077787e-03  -2.7276077e-03  -9.5207545e-04   2.5567141e-03   5.7640001e-03   7.2493313e-03   8.7657446e-03   9.6936514e-03   8.2424351e-03   6.7056798e-03   6.6223796e-03   5.3361705e-03   4.2407300e-03   5.2921590e-03   5.3701451e-03   3.7056775e-03   4.0930768e-03   6.2039352e-03   7.0975728e-03   9.3606848e-03   1.3065259e-02   1.7158722e-02   2.0710936e-02   2.2938187e-02   2.5035475e-02   2.6536585e-02   2.6309463e-02   2.6610505e-02   2.9756039e-02   3.3029432e-02   3.2690751e-02   3.5417308e-02   3.8291029e-02   4.1206116e-02   4.2438361e-02   4.5449498e-02   4.6434745e-02   4.7781223e-02   4.7029844e-02   4.6676047e-02   4.7016507e-02   4.6076777e-02   4.3468453e-02   4.1541828e-02   3.9366920e-02   3.6225946e-02   3.2345624e-02   3.1291296e-02   2.6139963e-02   2.4343738e-02   2.4162071e-02   2.5237196e-02   2.4029310e-02   2.6615518e-02   2.5061547e-02   2.1547182e-02   2.0162414e-02   1.7749326e-02   1.8867938e-02   2.0733405e-02   2.3184720e-02   2.2839912e-02   2.3386987e-02   2.0557287e-02   1.7805720e-02   1.6443675e-02   1.4964631e-02   1.1601742e-02   9.4825033e-03   7.4197651e-03   3.7929577e-03  -8.1279333e-04  -3.6545618e-03  -5.3079002e-03  -6.4883498e-03  -8.4014667e-03  -7.6144509e-03  -7.6626536e-03  -7.7808048e-03  -8.5567303e-03  -8.0741286e-03  -8.3327798e-03  -8.1238052e-03  -8.8534089e-03  -1.0081978e-02  -8.8405795e-03  -7.4308301e-03  -5.7815666e-03  -4.6378416e-03  -1.9014305e-03  -1.1384740e-03  -1.2224119e-03   2.5297131e-04   3.5601414e-03   4.3967237e-03   7.3617007e-03   9.1626084e-03   9.9678439e-03   9.3406148e-03   1.0088769e-02   8.0057727e-03   7.7726092e-03   6.5100895e-03   6.1924574e-03   4.6727850e-03   4.3313798e-03   5.4284067e-03   6.4799224e-03   3.6114274e-03   2.1918515e-03   7.1889699e-04  -4.8308522e-03  -7.8126125e-03  -8.0158459e-03  -9.3882753e-03  -1.0784824e-02  -9.4458079e-03  -8.6077342e-03  -7.3440229e-03  -3.9791805e-03  -3.4237949e-04   2.6652804e-03   5.5578694e-03   8.3423910e-03   8.7737707e-03   7.8959079e-03   7.5959597e-03   7.2756267e-03   6.3991401e-03   6.7389232e-03   7.7264641e-03   1.0425309e-02   1.2721519e-02   1.4009961e-02   1.6685665e-02   2.0972771e-02   2.2793792e-02   2.4145213e-02   2.5926129e-02   2.5683572e-02   2.4798519e-02   2.4038753e-02   2.1716174e-02   1.9756107e-02   2.0118574e-02   1.9435438e-02   1.9333981e-02   2.0729863e-02   2.1299705e-02   2.0428614e-02   1.9307171e-02   1.7170685e-02   1.2969700e-02   9.1685689e-03   6.1402075e-03   4.6447651e-03   2.6337931e-03   9.2379999e-04  -5.9659085e-04  -1.5760550e-03  -3.5365081e-03  -4.3136166e-03  -3.3345732e-03  -2.9087615e-03  -5.0474783e-03  -6.7152808e-03  -7.9715213e-03  -8.5254085e-03  -7.7204285e-03  -5.4907406e-03  -3.7464385e-03  -1.0235684e-03   4.4245235e-04   6.2295846e-04   1.2391209e-04  -1.2751871e-03  -3.0951301e-03  -3.6349709e-03  -4.5194256e-03  -5.7850307e-03  -6.0004693e-03  -5.9458598e-03  -7.0055287e-03  -8.1172099e-03  -7.3627486e-03  -6.6875246e-03  -7.4711322e-03  -9.1808309e-03  -1.0697836e-02  -1.1021076e-02  -8.9310385e-03  -7.8328428e-03  -5.4703541e-03  -1.3905096e-03   1.7332500e-03   1.7303174e-03   1.8966171e-03   1.8689212e-03   1.3628768e-03  -7.3508104e-04  -3.3458275e-03  -3.7630260e-03  -4.6234002e-03  -5.8262464e-03  -5.4133595e-03  -4.6010997e-03  -3.9690367e-03  -1.2771511e-03  -6.2233923e-04  -2.2031361e-03  -1.8328702e-03  -2.4610049e-03  -4.3504309e-03  -3.0601906e-03  -2.9835477e-03  -3.1026992e-03  -3.2881094e-03  -1.8067754e-03  -1.0036760e-03   3.7501682e-03   9.9884076e-03   1.9129551e-02   3.0136888e-02   4.1629016e-02   5.6761615e-02   7.3360203e-02   8.5764083e-02   9.2724112e-02   9.5884464e-02   8.8348087e-02   7.3097998e-02   5.7058652e-02   4.0107069e-02   2.4972251e-02   1.4319297e-02   7.5671716e-03   3.1193736e-04  -3.6011830e-03  -6.4601160e-03  -9.5236567e-03  -1.3884280e-02  -1.5108350e-02  -1.5972269e-02  -1.6732151e-02  -1.5552396e-02  -1.3348745e-02  -1.3491709e-02  -1.2170199e-02  -1.1237974e-02  -9.9612587e-03  -7.0974793e-03  -2.4584863e-03  -8.5455667e-04   8.4205444e-04   2.9890942e-03   7.4228851e-03   1.5222650e-02   2.3219882e-02   3.7647775e-02   5.2500214e-02   6.6346970e-02   7.6563987e-02   8.6316292e-02   8.8009156e-02   8.4899416e-02   7.5328891e-02   6.3025368e-02   5.1213849e-02   3.8119685e-02   2.6259811e-02   1.9505050e-02   1.3326961e-02   7.0913222e-03   3.5606410e-03   2.0866644e-03  -8.3338398e-04  -1.9379566e-03  -3.0794475e-03  -4.5250127e-03  -4.2182183e-03  -4.0128882e-03  -3.2783002e-03  -1.8720709e-03  -5.3090650e-04  -3.0026899e-05   1.5187600e-03   3.0820936e-03   4.3396179e-03   6.8256239e-03   8.8009908e-03   9.1356269e-03   8.0379537e-03   9.8044795e-03   1.0006625e-02   9.2217099e-03   1.0006326e-02   1.1711125e-02   9.8545182e-03   9.1890171e-03   9.3741944e-03   8.2851878e-03   6.3077699e-03   5.0251441e-03   5.2504983e-03   2.7931315e-03   3.4228752e-03   4.4413698e-03   3.3328353e-03   2.4466466e-03   3.9523858e-03   1.8611391e-03   3.4928936e-04   6.6700570e-04   8.4249460e-05  -2.7643523e-04   7.1487932e-04   1.0629847e-03   2.0929061e-03   2.1715459e-04  -1.7789738e-03  -3.9433386e-03  -5.2647380e-03  -6.4193193e-03  -5.5091285e-03  -5.1528504e-03  -4.0853113e-03  -3.9565607e-03  -4.0600387e-03  -5.7614663e-03  -5.1335324e-03  -8.1472710e-03  -1.0854942e-02  -1.2214051e-02  -1.1254419e-02  -1.2116339e-02  -9.9208931e-03  -6.8836173e-03  -5.5925524e-03  -4.3821705e-03  -1.4929606e-03  -6.8020738e-04   8.1013767e-04   5.4503373e-05   6.3401946e-04  -1.5652489e-04   8.9595697e-04   1.4054529e-04   2.2283352e-03   4.5771386e-03   7.2049071e-03   9.0717695e-03   1.1092510e-02   1.6551112e-02   2.0135923e-02   2.2705316e-02   2.4821084e-02   2.6440285e-02   2.3940110e-02   2.1251985e-02   1.8635113e-02   1.6639350e-02   1.5246864e-02   1.3521842e-02   1.2419300e-02   1.0522066e-02   8.0082873e-03   7.6348344e-03   7.6502207e-03   6.0443433e-03   3.9150531e-03   4.7117265e-03   5.1466102e-03   5.5095067e-03   6.7122759e-03   9.2779814e-03   9.2140144e-03   7.9949968e-03   8.3100553e-03   7.1367111e-03   6.8025943e-03   6.2540255e-03   7.1727659e-03   7.9681014e-03   8.9278976e-03   8.4231194e-03   9.4905536e-03   9.7316059e-03   8.3397979e-03   8.4381267e-03   1.0083540e-02   6.8946080e-03   4.0406701e-03   2.0237437e-03  -8.7258519e-04  -4.8940435e-03  -4.8123001e-03  -5.4094172e-03  -6.2480577e-03  -6.4073827e-03  -6.1767612e-03  -5.1967705e-03  -4.4393180e-03  -5.2508395e-03  -5.5879235e-03  -8.1056012e-03  -9.1495733e-03  -1.0849282e-02  -1.0671044e-02  -1.2245000e-02  -1.0249766e-02  -1.0484266e-02  -1.0385748e-02  -9.8666374e-03  -7.0955017e-03  -5.3830886e-03  -3.2183570e-03  -7.0292284e-04   5.6112354e-04   9.4529207e-04   2.7955418e-03   3.8730629e-03   5.9942188e-03   7.4845776e-03   9.1940750e-03   1.0787220e-02   1.3355765e-02   1.4060746e-02   1.5072896e-02   1.5927597e-02   1.5199870e-02   1.3492521e-02   1.2719348e-02   1.2351337e-02   1.1191630e-02   1.1169660e-02   1.2380755e-02   1.2427429e-02   1.2785839e-02   1.4115854e-02   1.3982765e-02   1.3256901e-02   1.3691987e-02   1.5019115e-02   1.7879564e-02   2.0943037e-02   2.3718714e-02   2.8660171e-02   3.4776487e-02   3.8299322e-02   4.2772676e-02   5.1421860e-02   5.9112418e-02   6.4042859e-02   7.1598329e-02   7.7080928e-02   7.5992005e-02   7.2964000e-02   6.8565774e-02   5.9470473e-02   5.2565816e-02   4.5774929e-02   3.8728376e-02   3.3281357e-02   3.0125036e-02   2.3930163e-02   2.0740633e-02   1.6703576e-02   1.3482685e-02   1.0392575e-02   8.7567282e-03   7.2201365e-03   6.7476794e-03   4.5056315e-03   2.8094538e-03   1.2478328e-03   4.3453979e-04  -1.9747781e-03  -2.2330833e-03  -3.5418692e-03  -3.4870232e-03  -4.9977108e-03  -3.4136960e-03  -2.9806265e-03  -1.5570170e-03  -2.0878568e-03  -3.1455419e-03  -3.8885478e-03  -3.7050667e-03  -4.3736783e-03  -4.5708196e-03  -5.5651943e-03  -5.9188599e-03  -6.0337105e-03  -4.6279560e-03  -4.0893153e-03  -2.9364901e-03  -2.9952961e-03  -3.1612512e-03  -4.2666226e-03  -4.9079683e-03  -5.4336963e-03  -5.9994707e-03  -6.1984232e-03  -5.9815825e-03  -5.2348338e-03  -4.1015034e-03  -4.0327603e-03  -4.8753448e-03  -5.4054388e-03  -8.1228136e-03  -9.5247832e-03  -8.7543368e-03  -8.2169116e-03  -8.7791645e-03  -5.7519749e-03  -4.0055469e-03  -5.0491690e-03  -6.5460671e-03  -7.0647127e-03  -8.4558990e-03  -1.0251837e-02  -1.0830679e-02  -1.0111063e-02  -1.0243466e-02  -1.0357576e-02  -9.6993365e-03  -6.6784830e-03  -6.8620639e-03  -5.8256138e-03  -5.2234207e-03  -4.5001692e-03  -6.7175194e-03  -6.9868087e-03  -7.7900394e-03  -8.2297628e-03  -9.3210732e-03  -1.0973476e-02  -1.2757168e-02  -1.3829450e-02  -1.5208607e-02  -1.5929989e-02  -1.5214672e-02  -1.3197846e-02  -1.4725296e-02  -1.5696588e-02  -1.4614423e-02  -1.4107437e-02  -1.4034412e-02  -1.1288415e-02  -8.0156162e-03  -6.4815570e-03  -4.0771495e-03  -1.0974821e-03   1.6663902e-03   3.5372586e-03   6.2256597e-03   8.7669340e-03   9.8077198e-03   1.3798969e-02   2.0255532e-02   2.3584714e-02   2.6281149e-02   3.2577779e-02   3.7702366e-02   3.8824579e-02   4.3423727e-02   5.0263839e-02   5.2765798e-02   5.2042588e-02   5.3575123e-02   5.4192383e-02   5.2499410e-02   5.2492045e-02   5.4465609e-02   5.5154283e-02   5.4476421e-02   5.1441716e-02   4.8082285e-02   4.3989834e-02   3.9271724e-02   3.6074418e-02   3.3292712e-02   3.1274072e-02   2.9294597e-02   2.8360892e-02   2.4799632e-02   2.3513580e-02   2.2253974e-02   2.1021326e-02   1.8552915e-02   1.6702715e-02   1.5141297e-02   1.2956888e-02   1.1633860e-02   1.1699949e-02   1.1923716e-02   1.4762828e-02   2.0788306e-02   2.5076809e-02   3.1329895e-02   3.4499305e-02   3.7047426e-02   3.6615064e-02   3.8570377e-02   3.8730658e-02   4.4460617e-02   4.7941662e-02   5.1482092e-02   5.4892166e-02   5.7145947e-02   5.6792334e-02   5.6932461e-02   5.5832229e-02   5.3214120e-02   5.0609840e-02   4.8984556e-02   4.6697125e-02   4.1496025e-02   3.4832910e-02   2.7874331e-02   2.3193306e-02   1.8391620e-02   1.6548156e-02   1.4026809e-02   1.2203189e-02   7.4316821e-03   5.0535404e-04  -4.6411994e-03  -6.9980873e-03  -1.0274977e-02  -1.3008812e-02  -1.4582560e-02  -1.6951844e-02  -1.9842195e-02  -2.1520972e-02  -2.1447039e-02  -2.1529812e-02  -2.0179852e-02  -1.8883137e-02  -1.7567530e-02  -1.6619691e-02  -1.3581812e-02  -1.1197296e-02  -8.7645508e-03  -6.5886108e-03  -3.8440985e-03  -4.4833301e-04   2.3702925e-03   5.6484769e-03   8.6550651e-03   9.3327270e-03   9.2374616e-03   8.6403528e-03   6.9128250e-03   5.3581062e-03   4.5128423e-03   3.4639830e-03   2.8424446e-03   1.7218858e-03  -1.1340236e-03  -3.1222844e-03  -4.4617099e-03  -6.3906455e-03  -6.8451589e-03  -4.4022227e-03  -4.1091275e-03  -4.7025762e-03  -4.5332234e-03  -4.2093980e-03  -4.4097086e-03  -2.8990565e-03  -1.8497152e-03  -5.7282472e-04   1.6249256e-03   3.2520212e-03   4.5289366e-03   6.0601150e-03   6.4219376e-03   5.8299125e-03   6.0223241e-03   6.3972403e-03   6.5540232e-03   8.2662268e-03   1.0073388e-02   1.0410587e-02   1.0681924e-02   1.1340779e-02   9.0142440e-03   7.4593838e-03   6.7527498e-03   5.0347217e-03   2.6164779e-03   1.6370322e-03   1.7496550e-05  -4.0209027e-04  -1.2917413e-03  -2.1499720e-03  -1.8870757e-03  -2.9927302e-03  -5.5510144e-03  -7.6834556e-03  -9.3817834e-03  -1.0415680e-02  -9.6122032e-03  -1.0065568e-02  -8.1706115e-03  -6.4586212e-03  -4.2281936e-03  -3.5014047e-03  -2.0830003e-03  -2.2065137e-03  -7.3310381e-04  -8.1418939e-04   6.9663552e-04   4.4068824e-03   5.7466474e-03   6.8318354e-03   8.0162778e-03   7.6531333e-03   6.3908284e-03   7.4840975e-03   7.7230750e-03   7.3286011e-03   5.5852864e-03   3.9043923e-03   4.9346137e-03   5.1198238e-03   5.1348522e-03   7.2555256e-03   9.1459522e-03   7.9150020e-03   7.9052442e-03   8.9119377e-03   8.5527285e-03   8.9083703e-03   9.8485830e-03   1.1707607e-02   1.0952305e-02   1.0966563e-02   1.0956623e-02   1.2072548e-02   1.1449645e-02   1.2245994e-02   1.3544668e-02   1.4455081e-02   1.5539728e-02   1.7697297e-02   2.0720629e-02   2.3102217e-02   2.4479789e-02   2.4817552e-02   2.4460344e-02   2.3686198e-02   2.3937310e-02   2.4320338e-02   2.4760463e-02   2.5179016e-02   2.4405258e-02   2.3703329e-02   2.4084969e-02   2.3760255e-02   2.1961581e-02   2.0733231e-02   1.9678139e-02   1.7878078e-02   1.6780272e-02   1.5644824e-02   1.5233941e-02   1.3548117e-02   1.0704289e-02   7.2824287e-03   6.2123617e-03   4.3283211e-03   3.1643219e-03   3.4417413e-03   3.7885918e-03   3.9479880e-03   4.9079819e-03   6.3915983e-03   8.1827370e-03   9.3290676e-03   1.0179793e-02   1.1693492e-02   1.2553273e-02   1.3029178e-02   1.4483932e-02   1.6514388e-02   1.8027775e-02   1.9910679e-02   2.2007995e-02   2.2588309e-02   1.9900400e-02   2.0198212e-02   2.0991982e-02   1.9522763e-02   1.7513948e-02   1.9429344e-02   1.8405113e-02   1.4320895e-02   1.2079672e-02   1.0129025e-02   7.7506987e-03   4.4751316e-03   2.8641516e-03   1.5599920e-03   3.4344328e-04  -3.2086288e-03  -5.2803677e-03  -6.4123087e-03  -8.2946690e-03  -9.1890615e-03  -9.0042935e-03  -1.0370392e-02  -1.3194808e-02  -1.5112924e-02  -1.6875490e-02  -1.8472154e-02  -1.8609521e-02  -1.7891586e-02  -1.7282482e-02  -1.6915139e-02  -1.6789332e-02  -1.7621648e-02  -1.8011867e-02  -1.6825621e-02  -1.6757466e-02  -1.6064443e-02  -1.4959452e-02  -1.4465854e-02  -1.4915253e-02  -1.3310451e-02  -1.2177632e-02  -1.1034417e-02  -8.7909627e-03  -7.8916109e-03  -8.5529347e-03  -7.6131894e-03  -6.5166713e-03  -6.8428145e-03  -7.9716542e-03  -7.1678238e-03  -7.7446912e-03  -9.7703012e-03  -1.1592469e-02  -1.0972144e-02  -1.2316990e-02  -1.3733446e-02  -1.3576079e-02  -1.3246289e-02  -1.3567761e-02  -1.1573325e-02  -8.1449993e-03  -2.3575707e-03   7.9016382e-03   2.4879573e-02   4.9728502e-02   8.3904380e-02   1.2815151e-01   1.7999267e-01   2.3291982e-01   2.7934474e-01   3.0994892e-01   3.1879175e-01   3.0473535e-01   2.7032623e-01   2.2249169e-01   1.7351949e-01   1.2887095e-01   9.0190010e-02   6.2635804e-02   4.5761273e-02   3.4734782e-02   2.6855860e-02   2.4602939e-02   2.1264661e-02   1.6436510e-02   1.1539649e-02   7.3225344e-03   1.5842551e-03  -3.6835815e-03  -7.2418362e-03  -1.1740103e-02  -1.6857691e-02  -2.1193987e-02  -2.4193600e-02  -2.7784157e-02  -3.1290643e-02  -3.1760002e-02  -3.2012673e-02  -3.1898293e-02  -3.0717803e-02  -2.8082872e-02  -2.7559561e-02  -2.6975328e-02  -2.5213843e-02  -2.4331698e-02  -2.2649473e-02  -1.9599358e-02  -1.6288256e-02  -1.2181001e-02  -6.2284735e-03  -4.6098907e-04   6.4033571e-03   1.4838544e-02   2.3179228e-02   3.1296004e-02   3.9450403e-02   4.4900970e-02   4.7318676e-02   4.6727563e-02   4.4552258e-02   3.9352021e-02   3.3660466e-02   2.7655791e-02   2.2927394e-02   1.8297083e-02   1.4685720e-02   1.1116420e-02   7.7127652e-03   3.9992832e-03  -3.4226594e-05  -1.0102635e-03  -4.6722815e-03  -4.3259416e-03  -5.2200307e-03  -6.1587403e-03  -8.2470172e-03  -7.0459516e-03  -6.3299140e-03  -4.6027991e-03  -2.4263602e-03  -1.2451152e-03   3.4179666e-05  -2.2202898e-04  -2.6564324e-04  -1.4059365e-04   3.0026558e-04   3.3658448e-03   4.6044377e-03   4.2782873e-03   4.8022796e-03   5.9785932e-03   5.5919025e-03   5.0255348e-03   5.5615630e-03   4.5516828e-03   1.2143060e-03  -1.2284100e-03  -1.5735675e-03  -9.8400768e-04   9.2640497e-04   4.8361101e-03   7.1955525e-03   8.7736227e-03   1.0621814e-02   1.1318013e-02   1.2780375e-02   1.3455500e-02   1.0711258e-02   7.6413854e-03   6.1200501e-03   4.6713825e-03   5.1987751e-03   8.0952154e-03   1.0440146e-02   1.0608434e-02   8.4736157e-03   6.0906746e-03   3.4930271e-03   9.4010330e-04  -7.0473856e-04  -2.4571409e-04  -1.4700446e-03  -3.6052173e-03  -3.7742671e-03  -3.2055890e-03  -3.1251092e-03  -1.2151602e-03   4.5638561e-03   8.6313767e-03   1.1400520e-02   1.2045453e-02   1.0511464e-02   7.6145437e-03   7.3822118e-03   5.9797312e-03   5.6233871e-03   7.4713435e-03   9.5756984e-03   8.4120686e-03   1.2755307e-02   1.3574231e-02   1.3283502e-02   1.5562200e-02   1.6989871e-02   1.8323992e-02   1.9692693e-02   1.9835603e-02   1.8036669e-02   1.6585791e-02   1.1047041e-02   8.2556018e-03   9.3017941e-03   7.8034942e-03   6.0672986e-03   3.4106879e-03   2.5578774e-03  -1.3129683e-03  -4.6821026e-03  -4.7180283e-03  -4.3731564e-03  -5.3952601e-03  -7.7620461e-03  -4.7063661e-03  -2.1726313e-03  -2.5842505e-03  -2.9662516e-03   1.0162249e-03  -5.7501117e-04  -2.2402196e-03   1.2354098e-03   4.1206442e-03   3.6481087e-03   4.8099012e-03   4.5544300e-03   4.9404681e-03   4.7877646e-03   5.4875402e-03   7.0864228e-03   8.6257511e-03   7.3029141e-03   7.8504530e-03   8.7994132e-03   8.7169326e-03   6.6734531e-03   5.4360695e-03   5.1755773e-03   4.4371226e-03   3.0485414e-03   1.7872626e-03   5.1806014e-04  -1.4525695e-03  -3.0536627e-03  -4.6029087e-03  -2.4275733e-03  -5.9161492e-04  -1.8265719e-03  -3.3727300e-03  -3.2587090e-03  -2.7239235e-03  -1.0359084e-03   2.9790500e-03   6.9005391e-03   9.9963700e-03   1.1992083e-02   1.5178374e-02   2.0547335e-02   2.5595326e-02   3.1720892e-02   3.7273080e-02   4.0413628e-02   4.3927682e-02   4.7712970e-02   5.0117514e-02   5.0630434e-02   5.0949808e-02   5.1466562e-02   5.3410458e-02   5.4250814e-02   5.4197066e-02   5.6432625e-02   5.6487665e-02   5.1809291e-02   4.5222223e-02   4.1083428e-02   3.3832989e-02   2.3616251e-02   1.6651681e-02   1.1215092e-02   4.4381803e-03  -1.1555263e-03  -5.3057174e-03  -1.0805791e-02  -1.5945065e-02  -1.8754014e-02  -1.9887876e-02  -1.9686379e-02  -1.9280238e-02  -1.9503289e-02  -2.1822468e-02  -2.3611427e-02  -2.4408117e-02  -2.3148793e-02  -2.0467295e-02  -1.7834083e-02  -1.5002800e-02  -1.2253470e-02  -1.1793946e-02  -1.1927236e-02  -1.1261562e-02  -1.2120712e-02  -1.3789014e-02  -1.2668556e-02  -9.9180407e-03  -5.2536762e-03   1.4158318e-03   8.6739480e-03   1.5002198e-02   2.1474909e-02   2.6102670e-02   2.8553945e-02   3.2975925e-02   3.8312797e-02   4.3493648e-02   4.9302067e-02   5.4168596e-02   5.7250550e-02   5.9142219e-02   5.8111979e-02   5.7140069e-02   5.6141413e-02   5.2308173e-02   4.7909679e-02   4.2509517e-02   3.5820904e-02   2.9610548e-02   2.4275177e-02   1.8469610e-02   1.3519840e-02   8.6806348e-03   4.5010357e-03   2.6199090e-03   1.2693388e-03   8.4002784e-04   1.2412047e-03   9.0509149e-04  -1.1712357e-03  -4.1128053e-04   3.0066857e-03   5.6699764e-03   7.9848951e-03   1.2214164e-02   1.4364057e-02   1.4921205e-02   1.6188979e-02   1.6919428e-02   1.5576669e-02   1.3752875e-02   1.4219627e-02   1.3832067e-02   1.3752426e-02   1.3768622e-02   1.3560895e-02   1.0767044e-02   6.8895697e-03   2.3323092e-03   1.4739139e-03   1.6782572e-03   1.1042276e-03   2.4741505e-03   4.3716774e-03   3.1933534e-03  -1.3699314e-03  -4.2636106e-03  -7.2724650e-03  -1.0031665e-02  -1.3541151e-02  -1.1471945e-02  -9.3993179e-03  -9.9861536e-03  -1.1554834e-02  -1.1197738e-02  -8.2921298e-03  -9.1610626e-03  -8.4957196e-03  -5.2589427e-03  -8.2999801e-04  -2.9727818e-03  -3.6502103e-03  -5.7947757e-03  -6.9780532e-03  -8.7965605e-03  -8.4627977e-03  -6.5513023e-03  -1.3862362e-03  -5.9376614e-05  -8.3856193e-05  -2.5375246e-04   2.4800710e-03   1.5775798e-02   2.3942093e-02   2.9835212e-02   3.5804637e-02   3.9503843e-02   3.1792303e-02   3.1708878e-02   3.7242360e-02   4.4413365e-02   4.8033812e-02   4.9966761e-02   5.3903233e-02   5.4860968e-02   5.0641745e-02   4.7091256e-02   4.2964895e-02   3.7465593e-02   3.1889018e-02   3.0142168e-02   2.8440887e-02   2.5594979e-02   2.0113595e-02   1.1937912e-02   2.0279291e-03  -4.9923854e-03  -8.1011083e-03  -1.1431899e-02  -1.2113702e-02  -1.1451274e-02  -1.1761607e-02  -1.3455710e-02  -1.3569497e-02  -1.3389315e-02  -1.5114983e-02  -1.7240954e-02  -1.8781423e-02  -1.7048847e-02  -1.4142212e-02  -9.4466216e-03  -5.5862190e-03  -1.0250661e-03   2.0348969e-03   1.7496626e-03  -6.3413621e-04  -5.1469233e-05   8.0843833e-04  -1.2587759e-03  -2.4849409e-03   1.1284074e-03   2.6404024e-03   3.8700858e-03   7.6379955e-03   1.0726727e-02   1.0633323e-02   1.0410709e-02   8.2314430e-03   6.8374135e-03   7.6568517e-03   5.1669886e-03   6.1012754e-03   1.1822563e-02   1.2218046e-02   1.2576918e-02   1.5093414e-02   1.6650770e-02   1.3491195e-02   1.3959726e-02   1.3661484e-02   1.4415977e-02   1.4043963e-02   1.3348594e-02   1.4904041e-02   1.7680615e-02   1.8925927e-02   1.9052026e-02   2.1340281e-02   2.0284690e-02   1.7302954e-02   1.6205250e-02   1.5961406e-02   1.4894886e-02   1.4160595e-02   1.5115449e-02   1.9252731e-02   2.1146322e-02   2.0675524e-02   1.9785293e-02   1.7770229e-02   1.1600903e-02   7.5055692e-03   6.8079934e-03   7.9550925e-03   8.7322754e-03   9.7815251e-03   9.6933006e-03   1.1737311e-02   1.2239114e-02   1.0963635e-02   1.3237020e-02   1.6041184e-02   1.3365676e-02   1.4106422e-02   1.4673079e-02   1.0746628e-02   7.0800471e-03   7.3482886e-03   5.5510832e-03   4.9719631e-03   4.6059527e-03   6.4159809e-03   7.5223301e-03   8.9095032e-03   7.6361386e-03   8.4128265e-03   6.8330171e-03   4.3827126e-03   1.1684635e-03   3.0476073e-03   5.2330038e-03   7.7948547e-03   1.1592401e-02   1.5689019e-02   1.4231028e-02   9.7023085e-03   1.0733826e-02   8.0011001e-03   4.8475806e-03   3.9111530e-03   8.1802008e-03   7.0696890e-03   7.4632120e-03   6.3278879e-03   7.6830141e-03   6.5593779e-03   2.9342651e-03   8.0293437e-04  -8.8460945e-04  -3.2126188e-03  -4.7594586e-03  -1.8530112e-03  -2.4701433e-03  -3.8535726e-03  -6.2099565e-03  -9.0040466e-03  -1.2639730e-02  -1.6720218e-02  -2.0323702e-02  -2.0987503e-02  -2.1947276e-02  -2.2887372e-02  -1.7263426e-02  -9.7152764e-03  -5.8127529e-03  -2.8830173e-03  -2.4531938e-04  -2.6063376e-03  -5.6048708e-03  -4.4684910e-03  -2.5537192e-03  -1.1541423e-03  -1.5635421e-03  -1.1851577e-03   1.4887644e-03   1.0600932e-03   3.7150317e-04   1.9733051e-03   6.3123264e-03   3.8150626e-03   5.8883097e-03   5.4212593e-03   8.4897741e-03   7.1187127e-03   7.0784082e-03   3.9260614e-03   1.7016596e-03  -1.5877628e-03  -2.0566989e-03  -1.4836976e-03  -1.6365763e-04   4.6801384e-03   8.8396099e-03   1.1126533e-02   1.3411040e-02   1.3709849e-02   1.4714613e-02   1.3416769e-02   1.5408355e-02   1.5641604e-02   1.3552936e-02   1.0192240e-02   1.0931694e-02   8.7667405e-03   8.4462079e-03   1.4673979e-02   1.9186292e-02   1.8922990e-02   1.7064271e-02   1.7812171e-02   1.5518343e-02   1.5480295e-02   1.7901387e-02   2.3882184e-02   2.3897121e-02   2.2331292e-02   1.8423144e-02   1.5720357e-02   1.1538291e-02   1.0112756e-02   1.2595740e-02   1.5370734e-02   1.9055473e-02   2.1416563e-02   2.3092786e-02   2.3801999e-02   2.3434472e-02   2.0962882e-02   1.8908364e-02   1.8676270e-02   1.7456632e-02   1.5540911e-02   1.1681965e-02   9.6762657e-03   1.0111448e-02   1.2564348e-02   1.5247931e-02   2.1053480e-02   2.5456966e-02   2.8150920e-02   3.2214143e-02   3.9917397e-02   4.3823791e-02   4.5346366e-02   4.5171484e-02   3.9135501e-02   3.3251358e-02   3.2675138e-02   3.3098362e-02   3.0663733e-02   3.0547635e-02   2.9127862e-02   2.4523713e-02   2.4472976e-02   2.7363946e-02   2.8666675e-02   2.4792599e-02   2.1767981e-02   1.3002690e-02   5.1304891e-03   1.5776295e-03   3.0297264e-03   2.7984608e-03   5.6457123e-03   6.5084866e-03   6.2059877e-03   5.3567339e-03   6.6340602e-03   4.6855813e-03   3.2449985e-03   3.5288495e-03   1.7962504e-03  -2.2648463e-03  -2.7713212e-03  -2.3644829e-03  -3.1637331e-03  -4.0952374e-03  -1.7859620e-03  -1.1410647e-03  -1.7389969e-03  -3.5092988e-03  -4.4267525e-03  -5.9811276e-03  -5.0218542e-03  -2.5221901e-03  -7.4016077e-04   8.3077836e-04   2.4563589e-03   1.7667742e-03  -1.8857019e-03  -3.2405320e-03  -5.2046960e-03  -7.4848302e-03  -9.8473707e-03  -8.8159053e-03  -8.6079759e-03  -6.2469221e-03  -5.3689487e-03  -4.1181010e-03  -5.5915256e-03  -6.3754203e-03  -7.5010026e-03  -8.2558325e-03  -8.7805255e-03  -6.7285290e-03  -7.1028085e-03  -8.6776809e-03  -9.3031860e-03  -8.5899627e-03  -1.0014075e-02  -9.4370799e-03  -8.4111236e-03  -3.2057375e-03  -3.1099646e-03  -2.2983910e-03  -7.5957847e-04   1.8744259e-03  -5.4494643e-04   1.0905290e-04   1.8136837e-03   2.8512504e-04  -8.9606365e-04  -1.9619277e-03  -1.1116339e-03  -7.4825065e-04   5.0323388e-04   8.3160599e-04   1.4092539e-03   4.2670483e-04   1.2482040e-04   1.2860095e-03   2.3125142e-03   5.2504862e-03   5.9801684e-03   5.8513111e-03   5.9552485e-03   6.3403122e-03   4.7994756e-03   5.7121821e-03   6.9283397e-03   7.9863667e-03   9.0277979e-03   9.1345215e-03   9.3758060e-03   9.6376860e-03   9.1194422e-03   8.5467431e-03   8.2313506e-03   8.2080800e-03   1.0215076e-02   9.8213335e-03   9.4421098e-03   1.0453972e-02   1.0887310e-02   8.1958284e-03   7.0604240e-03   6.3004914e-03   4.8410195e-03   3.4434879e-03   2.2848043e-03   1.4741012e-03  -7.1288508e-04  -2.2877148e-03  -3.1764283e-03  -3.1598647e-03  -3.8343937e-03  -3.8633436e-03  -4.5731230e-03  -5.0815985e-03  -6.5974105e-03  -6.6654579e-03  -6.6637930e-03  -6.7114069e-03  -7.8788243e-03  -8.0810073e-03  -9.2812620e-03  -9.3845407e-03  -9.9216106e-03  -1.1387099e-02  -1.2603418e-02  -1.4042106e-02  -1.6270863e-02  -1.7037102e-02  -1.7648356e-02  -1.8830567e-02  -1.8597987e-02  -1.9245752e-02  -2.0708936e-02  -2.0926319e-02  -2.0459659e-02  -2.1386006e-02  -2.1254964e-02  -2.0165183e-02  -1.9007681e-02  -1.8221571e-02  -1.5472016e-02  -1.1335481e-02  -7.1833949e-03  -3.1912278e-03   1.5881414e-03   6.4822538e-03   1.0514699e-02   1.6012602e-02   2.2350763e-02   2.9203305e-02   3.6215814e-02   4.3601517e-02   4.9847598e-02   5.4608871e-02   5.8210218e-02   6.0112848e-02   6.0868922e-02   6.0643604e-02   6.1133343e-02   6.2652169e-02   6.4331533e-02   6.7606690e-02   7.0746965e-02   7.4701907e-02   7.8041919e-02   8.2331971e-02   8.6248123e-02   8.9562287e-02   9.1909247e-02   9.4299330e-02   9.5365507e-02   9.4529062e-02   9.3750415e-02   9.2913657e-02   9.0693236e-02   8.6679596e-02   8.1894749e-02   7.7662326e-02   7.3199020e-02   6.8914564e-02   6.7163373e-02   6.6082474e-02   6.3584887e-02   6.0918257e-02   5.9317458e-02   5.6819558e-02   5.5076953e-02   5.5421790e-02   5.5652212e-02   5.6168112e-02   5.7046001e-02   5.7518745e-02   5.6084812e-02   5.6011928e-02   5.3730047e-02   5.1329497e-02   4.9512359e-02   4.7720618e-02   4.4823073e-02   4.2184958e-02   3.9198326e-02   3.4871068e-02   3.0682211e-02   2.6298741e-02   2.2084921e-02   1.8334729e-02   1.5648548e-02   1.2929533e-02   9.5474821e-03   6.4636717e-03   2.4296219e-03  -1.9316029e-03  -5.0196136e-03  -7.2848840e-03  -9.2788790e-03  -1.0463067e-02  -1.1261056e-02  -1.2853268e-02  -1.4700235e-02  -1.6832303e-02  -1.8723735e-02  -2.0514274e-02  -2.1470326e-02  -2.2173183e-02  -2.2473658e-02  -2.2610347e-02  -2.2514694e-02  -2.2511959e-02  -2.2107512e-02  -2.2315509e-02  -2.2479200e-02  -2.1949188e-02  -2.0836313e-02  -1.9926740e-02  -1.8291355e-02  -1.7177876e-02  -1.6656653e-02  -1.5913058e-02  -1.4859196e-02  -1.4386675e-02  -1.3547875e-02  -1.2622003e-02  -1.2169463e-02  -1.1684384e-02  -1.0461320e-02  -9.6082188e-03  -8.7712358e-03  -8.2959121e-03  -7.3874526e-03  -6.9552706e-03  -5.8423058e-03  -4.5853558e-03  -3.2430765e-03  -3.1747218e-03  -2.6074357e-03  -2.2186123e-03  -2.3410817e-03  -2.5945682e-03  -2.4713630e-03  -1.8987269e-03  -1.1672795e-03  -2.6728485e-04   4.1120808e-04   1.9387389e-03   2.8077523e-03   2.8097749e-03   3.2681128e-03   4.3720372e-03   5.0146686e-03   5.7163200e-03   7.1339573e-03   8.1393859e-03   8.9349039e-03   9.8114943e-03   1.1128496e-02   1.1845011e-02   1.2262449e-02   1.4442811e-02   1.5008667e-02   1.4760435e-02   1.5693600e-02   1.7150544e-02   1.5947563e-02   1.6213019e-02   1.6896437e-02   1.6848333e-02   1.6275978e-02   1.7177220e-02   1.7492711e-02   1.7281459e-02   1.6990278e-02   1.7434652e-02   1.6524278e-02   1.5911864e-02   1.5941520e-02   1.6148725e-02   1.6188369e-02   1.6490131e-02   1.6509573e-02   1.6769455e-02   1.6530149e-02   1.5075132e-02   1.4200830e-02   1.3014493e-02   1.1665958e-02   1.0771288e-02   9.9999503e-03   9.6195084e-03   9.8082271e-03   8.8385037e-03   7.2620786e-03   6.2510209e-03   4.9189811e-03   3.0977532e-03   1.7811080e-03   2.3513452e-03   2.1598392e-03   1.4048662e-03   1.6281712e-03   1.5242972e-03   1.8955283e-04   1.3382024e-04   4.9153080e-04   3.9409175e-04   8.2305620e-04   1.9443375e-03   2.8135816e-03   3.3413904e-03   4.2116289e-03   5.0723160e-03   5.0903122e-03   4.6072088e-03   4.5000190e-03   4.2398981e-03   4.6798671e-03   5.8556643e-03   7.4562509e-03   8.8891843e-03   9.7869771e-03   1.0140970e-02   1.0597517e-02   1.0487847e-02   1.0584137e-02   1.0684027e-02   1.0791732e-02   1.0326310e-02   1.0402539e-02   1.0238943e-02   1.0029388e-02   9.5099404e-03   8.8101909e-03   8.4226543e-03   7.6404515e-03   6.1936472e-03   5.1093782e-03   4.1596747e-03   2.3694290e-03   6.4089501e-04  -1.9892145e-04  -8.5640309e-04  -1.1803200e-03  -1.5695049e-03  -1.0843757e-03  -1.0906437e-03  -8.4889655e-04  -1.6383612e-03  -1.3381389e-03  -2.0349674e-03  -1.8359615e-03  -2.2379055e-03  -2.0717126e-03  -2.6185539e-03  -2.6204661e-03  -2.8769543e-03  -2.9609710e-03  -3.6291260e-03  -4.1989479e-03  -4.9544875e-03  -5.1731465e-03  -4.6804877e-03  -3.6419157e-03  -2.5362862e-03  -2.0606109e-03  -1.2019896e-03  -8.4240168e-04  -6.2827577e-04   4.6638617e-04   4.1283099e-03   7.3136021e-03   8.9686591e-03   9.8481690e-03   1.0044406e-02   8.2927805e-03   6.2445925e-03   6.0448060e-03   7.0634302e-03   7.7514506e-03   8.1031808e-03   8.7289580e-03   8.9521516e-03   7.5903987e-03   5.9673829e-03   4.9267489e-03   2.7668316e-03   1.3343904e-04  -2.7504794e-03  -4.2717306e-03  -5.4882873e-03  -6.2155767e-03  -6.2604652e-03  -4.3086069e-03  -3.8808102e-03  -3.9936594e-03  -3.1768428e-03  -2.5063562e-03  -2.0066622e-03  -5.0789471e-04   6.8055461e-04   2.2632096e-03   2.7414052e-03   3.2335510e-03   3.2733069e-03   4.9313330e-03   6.1575321e-03   8.7062857e-03   1.0910463e-02   1.4180112e-02   1.6829552e-02   1.9216567e-02   2.1610070e-02   2.3080118e-02   2.3649510e-02   2.4485038e-02   2.4465706e-02   2.3345478e-02   2.1791575e-02   1.9642992e-02   1.6771616e-02   1.3005969e-02   1.0925885e-02   9.1232557e-03   8.0263427e-03   7.6069863e-03   8.8956842e-03   9.7244602e-03   1.0988904e-02   1.2089853e-02   1.2258799e-02   1.2521412e-02   1.1028234e-02   1.1124988e-02   1.0490506e-02   9.8419869e-03   8.5119150e-03   8.1167923e-03   6.7184174e-03   4.3138569e-03   1.8497091e-03   1.4270435e-04  -1.8219976e-03  -4.3216851e-03  -4.7261880e-03  -5.8324869e-03  -7.6815448e-03  -9.4643159e-03  -1.1104490e-02  -1.2217413e-02  -1.3024883e-02  -1.2947300e-02  -1.2625114e-02  -1.2332114e-02  -1.3137610e-02  -1.2277972e-02  -1.2647592e-02  -1.2142258e-02  -1.1593971e-02  -1.1666436e-02  -1.2443251e-02  -1.2088039e-02  -1.2008742e-02  -1.1684511e-02  -1.0632312e-02  -9.6957786e-03  -8.8161713e-03  -9.0919026e-03  -8.4582738e-03  -7.4416334e-03  -6.4920894e-03  -5.6766316e-03  -4.0301589e-03  -3.5274108e-03  -2.1440711e-03  -3.2276654e-04   1.4184268e-03   3.3946400e-03   5.1838343e-03   6.4062993e-03   8.0514072e-03   9.3254380e-03   1.0913974e-02   1.3299259e-02   1.5798869e-02   1.7128235e-02   1.8783119e-02   2.2443086e-02   2.4905958e-02   2.7588676e-02   3.0278745e-02   3.2948141e-02   3.3924700e-02   3.6169726e-02   3.8081475e-02   3.9870409e-02   4.2464185e-02   4.3739827e-02   4.4114636e-02   4.3494970e-02   4.3159640e-02   4.1940108e-02   4.1611971e-02   4.1865732e-02   4.1392755e-02   4.1304090e-02   4.0352438e-02   3.9423405e-02   3.7742245e-02   3.7995348e-02   3.7564640e-02   3.7129279e-02   3.5695299e-02   3.4654192e-02   3.2061484e-02   2.9804345e-02   2.8384882e-02   2.8045175e-02   2.7492054e-02   2.8514041e-02   2.9699197e-02   3.0319095e-02   2.9463203e-02   2.9515772e-02   2.7764430e-02   2.5906251e-02   2.4175239e-02   2.2101194e-02   1.9793222e-02   1.8775639e-02   1.7361125e-02   1.6248606e-02   1.6495254e-02   1.6788864e-02   1.5410587e-02   1.3966993e-02   1.2445668e-02   1.0369870e-02   7.7675203e-03   6.0068391e-03   5.1907854e-03   4.1022594e-03   3.6825467e-03   3.7918966e-03   4.0846701e-03   3.6267167e-03   2.7981955e-03   1.0501533e-03   1.0437996e-04  -1.2429555e-03  -2.1126938e-03  -1.9172325e-03  -1.5356571e-03  -1.5698828e-03  -1.4901342e-03  -2.3513247e-03  -3.3765967e-03  -4.2831046e-03  -5.2269356e-03  -5.5899867e-03  -5.4587975e-03  -5.2408544e-03  -4.7751285e-03  -5.4198614e-03  -5.4698134e-03  -6.2240619e-03  -6.6244160e-03  -7.1900306e-03  -6.7758954e-03  -7.2826905e-03  -7.0266664e-03  -7.1179615e-03  -6.8809318e-03  -7.1260925e-03  -6.7154862e-03  -6.7714702e-03  -7.1019601e-03  -7.1121487e-03  -6.8938229e-03  -7.0666979e-03  -7.0089662e-03  -6.9533435e-03  -6.6791564e-03  -6.2671564e-03  -6.5952563e-03  -6.4126399e-03  -5.9890740e-03  -5.9803031e-03  -5.9057280e-03  -4.9633724e-03  -4.3982423e-03  -4.1445620e-03  -4.0241551e-03  -3.8020100e-03  -3.8330647e-03  -3.7477781e-03  -3.1065013e-03  -2.4033767e-03  -1.5430467e-03  -9.8057300e-04  -7.5528462e-04  -3.4450450e-04  -4.6003607e-05  -6.1328691e-05  -1.3051084e-04   6.9131395e-04   7.3310428e-04   1.3202955e-03   1.6305833e-03   2.2391911e-03   2.1282346e-03   2.4482015e-03   2.2119016e-03   1.8694933e-03   1.9907744e-03   2.4224413e-03   2.5889930e-03   2.6448058e-03   3.0677345e-03   3.3254941e-03   3.3242748e-03   3.5419415e-03   3.6648955e-03   3.6497457e-03   3.4202514e-03   3.4705507e-03   3.4078592e-03   3.7480931e-03   3.7993247e-03   4.1919327e-03   4.2050033e-03   4.3462714e-03   4.3249116e-03   4.5028567e-03   3.9890480e-03   3.7533872e-03   3.8246270e-03   3.4682384e-03   3.0141717e-03   3.4430116e-03   3.6397400e-03   3.4282067e-03   3.7677333e-03   3.9807485e-03   3.4623828e-03   3.8540959e-03   3.8951255e-03   3.5233882e-03   3.3860943e-03   3.8230397e-03   3.3538122e-03   3.3075497e-03   3.0241831e-03   3.2196558e-03   3.0979551e-03   2.8281773e-03   2.4739587e-03   2.4150651e-03   2.1128089e-03   1.6875428e-03   1.5890675e-03   1.1960347e-03   1.0984351e-03   1.1152683e-03   1.2962597e-03   1.2679533e-03   1.4353537e-03   1.6445782e-03   1.3234469e-03   1.0873557e-03   9.6536260e-04   1.1691484e-03   9.8206146e-04   1.1835039e-03   1.0228932e-03   1.6666700e-03   1.3186099e-03   1.6404315e-03   1.3003443e-03   1.4337936e-03   8.4889756e-04   1.0243863e-03   5.9779833e-04   1.0036288e-03   1.1245702e-03   1.3019236e-03   1.1725994e-03   1.4269278e-03   1.1705632e-03   9.5297254e-04   7.0149998e-04   9.4201460e-04   1.1700064e-03   1.8382797e-03   2.4927735e-03   3.0030192e-03   3.0253276e-03   2.7528856e-03   1.8727932e-03   1.6995150e-03   1.6228987e-03   1.8425886e-03   1.8190805e-03   2.3151908e-03   2.5315830e-03   2.3296221e-03   2.2756901e-03   2.3892735e-03   2.4075609e-03   2.5714097e-03   3.0535099e-03   3.4423647e-03   3.6130575e-03   3.4631889e-03   3.2200157e-03   2.9061872e-03   2.6325132e-03   3.1765710e-03   3.2710427e-03   3.2849132e-03   3.5753358e-03   3.4254256e-03   3.1994454e-03   3.3513660e-03   2.4008534e-03   2.1921445e-03   1.9418651e-03   1.2164320e-03   8.7325146e-04   1.3465637e-03   5.3165993e-04   7.3534671e-04   5.5754074e-04   6.8228256e-04   4.0232072e-04   3.4140394e-04  -1.9014847e-04  -3.9912098e-04  -1.4769476e-03  -1.6277446e-03  -1.8606131e-03  -2.4997898e-03  -2.7637061e-03
  -2.2605438e-03   3.3910013e-04   9.0686599e-04  -1.5674271e-03  -2.3083781e-03  -4.2658778e-03  -5.7608654e-03  -6.6709405e-03  -4.5348527e-03  -2.7807775e-03  -1.6023327e-03  -1.2079015e-03   7.8139538e-04   2.1547957e-03   1.6061879e-03   1.4025381e-03   2.9896514e-04  -1.4838461e-03  -1.7821508e-03  -2.3057356e-03  -8.5018460e-04   2.0860124e-03   4.5937294e-03   6.2703027e-03   9.1876177e-03   1.1811130e-02   1.0917925e-02   1.1195499e-02   1.1589799e-02   1.1717839e-02   1.0990445e-02   1.2594765e-02   1.2929321e-02   1.4310170e-02   1.4019916e-02   1.3106836e-02   1.3700802e-02   1.3491684e-02   1.1891668e-02   1.2127085e-02   1.3655834e-02   1.4140374e-02   1.3567589e-02   1.2754671e-02   1.1290648e-02   9.7710230e-03   7.9588727e-03   7.9874496e-03   8.0691130e-03   5.7762750e-03   6.3295364e-03   3.7879471e-03   3.3659999e-03   3.1216379e-03   4.9056176e-03   4.5697325e-03   8.5564538e-03   8.0100598e-03   6.7074750e-03   6.5368822e-03   3.3204723e-03   3.6896521e-04   2.1228041e-04   7.7032470e-04   7.0429371e-04   2.7410213e-03   3.7383276e-03   2.0938256e-03   1.3298349e-03   4.5739118e-04   1.0442019e-03   1.7989304e-03   3.2283662e-03   3.9927175e-03   5.2607228e-03   6.1318502e-03   6.5848638e-03   9.4859403e-03   1.2373324e-02   1.4000123e-02   1.3740254e-02   1.4024927e-02   1.4513731e-02   1.5890214e-02   1.7303276e-02   1.8478299e-02   1.9800800e-02   2.0190454e-02   1.9133698e-02   1.8400253e-02   1.8940825e-02   1.8734824e-02   1.8035303e-02   1.7530199e-02   1.6286423e-02   1.3288330e-02   1.0681019e-02   9.3494976e-03   8.5977035e-03   9.1593411e-03   1.0440204e-02   1.1493995e-02   1.0111233e-02   7.8794099e-03   5.4805518e-03   3.3474259e-03   1.8909241e-04  -3.2118319e-03  -4.9003070e-03  -6.4098409e-03  -7.7177016e-03  -6.7562268e-03  -5.1226580e-03  -5.8473767e-03  -6.6372425e-03  -8.3957896e-03  -1.2768033e-02  -1.2102393e-02  -1.3628285e-02  -1.5089416e-02  -1.5167285e-02  -1.2809304e-02  -1.3956116e-02  -1.2439761e-02  -9.7542866e-03  -1.0307584e-02  -1.1011564e-02  -1.1089304e-02  -1.1841289e-02  -1.4701054e-02  -1.3810543e-02  -1.3064071e-02  -1.3998280e-02  -1.3057003e-02  -1.0632760e-02  -1.0369613e-02  -1.0602828e-02  -9.7580314e-03  -8.9231464e-03  -8.5085738e-03  -6.1481112e-03  -2.8728071e-03   1.0636591e-04   2.2927914e-03   3.8912409e-03   5.0625675e-03   6.7621957e-03   8.8549037e-03   1.0512054e-02   1.1972608e-02   1.3127457e-02   1.4071514e-02   1.3061529e-02   1.1785656e-02   1.0012128e-02   8.4390397e-03   6.6036813e-03   7.4918104e-03   1.0580559e-02   1.4283211e-02   1.6516943e-02   1.9002227e-02   2.0064317e-02   2.0552822e-02   2.1437858e-02   2.4398611e-02   2.7562471e-02   3.0441703e-02   3.2205999e-02   3.4435619e-02   3.7254532e-02   3.8616966e-02   4.0911970e-02   4.2942873e-02   4.4558550e-02   4.6616457e-02   4.6506294e-02   4.4654187e-02   4.4759245e-02   4.4694582e-02   4.3180498e-02   4.3150918e-02   4.3641390e-02   4.2754478e-02   4.0919397e-02   3.6722401e-02   3.3076626e-02   2.9688897e-02   2.4736216e-02   2.1627383e-02   1.9941456e-02   1.7837683e-02   1.6588556e-02   1.7631525e-02   1.7966563e-02   1.8153425e-02   1.9284364e-02   2.1815516e-02   2.2598255e-02   2.2257287e-02   2.2491095e-02   2.1557710e-02   1.7042450e-02   1.2620556e-02   1.0309870e-02   6.7758957e-03   4.3257301e-03   1.7084596e-03   6.8786616e-04  -1.3050691e-03  -2.5757814e-03  -4.0055244e-03  -2.5222902e-03  -2.9021395e-03  -4.8733138e-03  -7.9176088e-03  -8.6463553e-03  -1.0474809e-02  -1.1281090e-02  -9.9280151e-03  -6.6736437e-03  -7.0368241e-03  -5.8842373e-03  -5.3665407e-03  -6.6375252e-03  -7.9289613e-03  -8.4971429e-03  -9.6701335e-03  -1.0150472e-02  -9.7214633e-03  -7.8256797e-03  -6.2266286e-03  -4.6530443e-03  -3.5865915e-03   1.4916082e-03   4.2434252e-03   6.9313291e-03   9.1000337e-03   1.2406548e-02   1.1284915e-02   1.0169931e-02   9.9685448e-03   9.6658897e-03   8.2938667e-03   6.4961462e-03   5.1982838e-03   3.7521601e-03   1.6161252e-03   4.5217240e-04   1.0129978e-03   6.1612965e-04   9.2270797e-04   9.2971468e-04   1.0578734e-03   8.8607655e-04   1.1428290e-03  -7.4512359e-05   1.0923800e-03   3.8968746e-03   5.2002799e-03   6.8477453e-03   8.3355685e-03   8.0113414e-03   5.6052326e-03   3.7992988e-03   3.1429338e-03   4.3692461e-03   5.8079667e-03   6.9863476e-03   8.7677459e-03   9.0888756e-03   8.8818172e-03   9.2797570e-03   1.0169652e-02   1.1549860e-02   1.3582254e-02   1.4460074e-02   1.4636472e-02   1.5044794e-02   1.4397900e-02   1.5473895e-02   1.4850249e-02   1.4632074e-02   1.4696471e-02   1.4140925e-02   1.0895388e-02   1.0450092e-02   1.0710667e-02   1.0460426e-02   1.0687500e-02   1.2194110e-02   1.1038301e-02   9.1081295e-03   6.8335283e-03   5.5545084e-03   3.7461594e-03   2.8340353e-03   1.6453309e-03   1.7410559e-03  -2.8846956e-04  -6.5735366e-04   1.2901592e-03   4.5995035e-03   6.0793570e-03   7.2388310e-03   5.1043031e-03   1.1213112e-03  -3.1350216e-03  -4.6733316e-03  -4.2299808e-03  -2.4437353e-03  -9.9799309e-04   3.9716625e-04  -1.5233578e-03  -3.4767069e-03  -4.9528010e-03  -4.7044479e-03  -5.2636848e-03  -5.1545614e-03  -5.5057678e-03  -6.8471196e-03  -7.7836933e-03  -8.9577156e-03  -8.8466034e-03  -1.0181096e-02  -9.7980433e-03  -9.5623672e-03  -1.0481819e-02  -1.2898493e-02  -1.2140175e-02  -1.1254593e-02  -1.1965736e-02  -1.0325834e-02  -8.2445935e-03  -7.3162481e-03  -6.2390534e-03  -3.9641474e-03  -2.5357179e-03  -9.1229317e-04  -8.4102239e-04  -1.7647935e-03  -3.3189834e-04  -4.9173248e-04   1.3137461e-03   3.7066177e-03   4.9933714e-03   2.8705167e-03   1.9139304e-03  -4.6511414e-04  -2.0798780e-03  -2.7215765e-03  -1.3982501e-03   8.8548567e-04   2.1712271e-03   3.3164007e-03   4.8287800e-03   6.9254192e-03   9.7162941e-03   1.4394292e-02   2.0428797e-02   2.8612608e-02   3.8984547e-02   4.9986513e-02   6.0433048e-02   7.0601339e-02   7.8154202e-02   7.6545678e-02   6.9990515e-02   6.0069950e-02   4.6378730e-02   3.2155832e-02   2.2821377e-02   1.3918390e-02   8.1189238e-03   2.9689957e-03  -1.2327166e-03  -4.3835009e-03  -4.5602861e-03  -6.4705131e-03  -7.3628813e-03  -8.6205783e-03  -1.0623708e-02  -1.3273716e-02  -1.4455007e-02  -1.4304075e-02  -1.3331475e-02  -1.1624900e-02  -1.0094037e-02  -7.5550045e-03  -6.0727946e-03  -4.1203642e-03  -1.8133897e-03   7.6585995e-04   3.4762233e-03   9.9973259e-03   1.8192219e-02   2.5273171e-02   3.5208950e-02   4.6432761e-02   5.7344843e-02   6.4614834e-02   7.0912933e-02   7.1682296e-02   6.6460784e-02   5.6559459e-02   4.5947956e-02   3.4433225e-02   2.4215061e-02   1.6880681e-02   1.1706570e-02   8.1551096e-03   5.1710772e-03   3.6386486e-03   1.8215973e-03  -8.5523904e-04  -2.3708896e-03  -2.2198573e-03  -4.4400956e-03  -3.4674148e-03  -1.4334988e-03  -1.4408305e-03  -2.5938552e-03  -2.4258131e-04  -3.4586591e-05  -3.1756056e-04   1.2750177e-03   4.1426407e-03   5.0784922e-03   6.3132304e-03   8.2079726e-03   7.3202071e-03   6.2683452e-03   6.4089507e-03   6.2826875e-03   4.7989428e-03   5.0700216e-03   5.4307275e-03   5.8456958e-03   5.4480243e-03   4.2726854e-03   3.0659339e-03   2.1674330e-03   7.5999940e-04   1.5210975e-03   1.4718987e-03   1.6715537e-03   1.9301337e-03   2.3091221e-03   1.4251001e-03   2.8958192e-03   3.6863309e-03   3.9648104e-03   4.7069809e-03   4.7576607e-03   3.6943663e-03   2.1624977e-03  -6.6268083e-04  -2.0280712e-03  -3.5058748e-03  -5.0976670e-03  -5.4601891e-03  -4.0163612e-03  -4.3219686e-03  -4.3950207e-03  -3.7712626e-03  -1.5512083e-03  -6.1364475e-04  -1.3698677e-03  -1.4559579e-03   6.3560804e-04  -7.6654770e-04  -2.3607820e-03  -1.9127791e-03  -2.1644445e-03  -3.8591597e-03  -3.2034575e-03  -2.0797324e-03   4.0653043e-05   1.1308668e-03   2.7186862e-03   2.2595995e-03   2.4982191e-03   2.7566626e-03   3.1287057e-03   3.1235426e-03   4.8817884e-03   5.8412724e-03   5.1138627e-03   6.6449497e-03   9.2995945e-03   1.1336928e-02   1.2182549e-02   1.5747104e-02   1.7303879e-02   1.6451747e-02   1.5841174e-02   1.6766531e-02   1.4829211e-02   1.3096235e-02   1.1843156e-02   1.0527377e-02   9.0428889e-03   7.2282099e-03   4.7264451e-03   1.7571398e-03  -9.1807801e-04  -3.8536545e-03  -4.6880177e-03  -4.1822100e-03  -3.2025745e-03  -3.1403963e-03  -1.7777468e-03  -1.6526994e-03  -1.9686179e-03  -1.0318798e-03   3.0472004e-04   4.1688836e-04  -1.0216079e-04   1.7906475e-03   2.9532333e-03   4.5021874e-03   5.4780143e-03   7.2893031e-03   8.6344866e-03   1.0247784e-02   1.0774865e-02   1.1670620e-02   1.1700333e-02   9.7223777e-03   8.3937830e-03   6.8674833e-03   6.4018046e-03   4.4310446e-03   2.4351507e-03   2.3724147e-04  -7.4217773e-04  -2.7449120e-03  -2.9945067e-03  -4.1773807e-03  -6.6902096e-03  -8.0332085e-03  -1.0159326e-02  -1.1611028e-02  -8.8767152e-03  -8.7506952e-03  -1.0156081e-02  -8.4013325e-03  -7.5129566e-03  -1.0703213e-02  -9.7854223e-03  -9.5471004e-03  -1.0158508e-02  -9.2394445e-03  -7.8937699e-03  -7.7947025e-03  -5.8745272e-03  -3.7778397e-03  -3.2922648e-03  -1.3131614e-03   3.7828909e-04   1.2905888e-03   2.0573201e-03   4.7624953e-03   7.3366643e-03   1.0607383e-02   1.3804975e-02   1.6039820e-02   1.7267665e-02   1.9037720e-02   2.0215845e-02   1.9729656e-02   2.0192960e-02   2.2214390e-02   1.9978690e-02   1.9015027e-02   1.9549030e-02   1.9219110e-02   1.7487081e-02   2.1314032e-02   2.3887152e-02   2.5143583e-02   2.6278928e-02   2.7002462e-02   2.5707953e-02   2.3760140e-02   2.5485518e-02   2.7705658e-02   3.2511373e-02   3.7463166e-02   4.5684657e-02   5.1290734e-02   5.6412732e-02   5.8702607e-02   5.9994870e-02   5.8833692e-02   5.8637252e-02   5.7682839e-02   5.4046574e-02   5.0179546e-02   4.5836703e-02   3.8381560e-02   3.2506631e-02   2.8530716e-02   2.4882329e-02   1.9647084e-02   1.7938514e-02   1.6356567e-02   1.3274189e-02   1.1439708e-02   1.2956648e-02   1.2491155e-02   1.0195539e-02   9.8863759e-03   9.2381513e-03   7.0104130e-03   6.6994486e-03   4.5517009e-03   3.6918484e-03   2.8936942e-03   2.7411057e-03  -3.3330176e-04  -8.8835692e-04  -1.5083907e-03  -2.1131922e-03  -2.4679440e-03  -9.8409933e-04   1.6651143e-04  -3.6446442e-04  -1.9369415e-03  -2.8367278e-03  -3.3853382e-03  -4.5003515e-03  -5.7501762e-03  -5.4600822e-03  -5.2927464e-03  -5.5816556e-03  -5.5380870e-03  -4.9030887e-03  -5.4137723e-03  -6.4503654e-03  -7.6740392e-03  -8.8134646e-03  -9.6936254e-03  -1.0559424e-02  -1.1893279e-02  -1.1852451e-02  -1.2591761e-02  -1.2380501e-02  -1.1849108e-02  -1.1682242e-02  -1.2072267e-02  -1.1521119e-02  -1.1172717e-02  -1.1682774e-02  -1.0528496e-02  -9.1287474e-03  -8.7285794e-03  -1.0230701e-02  -1.0221093e-02  -1.0462324e-02  -1.1401338e-02  -1.0762548e-02  -7.9824258e-03  -4.7114767e-03  -5.8192803e-03  -3.3687671e-03  -1.4794763e-03  -2.3610351e-03  -5.2616906e-03  -3.7198792e-03  -6.2172972e-03  -7.1929807e-03  -6.2803480e-03  -5.0324279e-03  -4.5465038e-03  -4.2291084e-03  -5.9375752e-03  -7.2983901e-03  -8.1304842e-03  -8.6192969e-03  -7.3014672e-03  -6.8704583e-03  -5.7675732e-03  -6.3652436e-03  -6.1497896e-03  -6.6209093e-03  -6.1422738e-03  -7.3962642e-03  -7.2325028e-03  -7.1666879e-03  -6.5744235e-03  -5.1954662e-03  -2.9828551e-03   5.5469776e-04   3.3483932e-03   5.1650548e-03   9.0332784e-03   1.3277301e-02   1.7837731e-02   2.3598485e-02   2.9887861e-02   3.5138140e-02   4.0995630e-02   4.4611818e-02   4.4980610e-02   4.6184768e-02   4.6661673e-02   4.5664131e-02   4.5937620e-02   4.7468247e-02   4.7187716e-02   4.6948343e-02   4.7287809e-02   4.7977694e-02   4.6796135e-02   4.5765050e-02   4.2919728e-02   3.9878337e-02   3.6541181e-02   3.3271639e-02   2.8162653e-02   2.4468989e-02   2.0702226e-02   1.6689413e-02   1.4578372e-02   1.3718917e-02   1.3078398e-02   1.1761218e-02   9.7788440e-03   9.6608811e-03   1.1352055e-02   1.1961362e-02   1.3008428e-02   1.4867050e-02   1.4990518e-02   1.5213476e-02   1.8047669e-02   2.0674811e-02   2.4334065e-02   2.7316145e-02   3.1396623e-02   3.5839221e-02   4.0404139e-02   4.2733073e-02   4.6661322e-02   4.8315928e-02   4.8829224e-02   5.0808902e-02   5.3372840e-02   5.4653440e-02   5.4950678e-02   5.3491364e-02   5.1062344e-02   4.5999984e-02   4.0686448e-02   3.6810204e-02   3.4174011e-02   2.9552449e-02   2.5989687e-02   2.2664289e-02   1.9170162e-02   1.3957415e-02   9.7348134e-03   6.4331210e-03   3.2257264e-03  -8.9409173e-04  -4.0284545e-03  -6.5918157e-03  -8.9103437e-03  -1.0875635e-02  -1.1394531e-02  -1.2349902e-02  -1.5083062e-02  -1.6977680e-02  -1.8826618e-02  -2.1505362e-02  -2.2829849e-02  -2.3426376e-02  -2.3745258e-02  -2.2146676e-02  -1.9831266e-02  -1.7932778e-02  -1.4053382e-02  -1.0245439e-02  -7.9643532e-03  -5.7095836e-03  -2.2562952e-03   2.3040190e-05   7.9323057e-04   1.9753146e-03   3.0765464e-03   2.8110159e-03   3.6840128e-03   3.7669289e-03   4.0263983e-03   2.7518495e-03   2.3751919e-03   3.6142644e-04   1.2433264e-04  -2.7552227e-03  -3.5476427e-03  -4.9834754e-03  -4.9392809e-03  -5.8957177e-03  -3.8027535e-03  -3.0869686e-03  -2.0304618e-03  -9.6744415e-04   8.8108046e-04   1.6461213e-03   2.5258236e-03   2.9214427e-03   3.0699553e-03   2.9091289e-03   3.1709653e-03   5.0821085e-03   6.7530154e-03   6.7624645e-03   7.0823023e-03   8.1129186e-03   7.3739718e-03   7.3213183e-03   8.3930029e-03   9.4834704e-03   9.7627447e-03   9.6880900e-03   1.0832160e-02   9.7327198e-03   1.1393087e-02   1.2240217e-02   1.1758398e-02   9.0594111e-03   9.1186381e-03   6.7708162e-03   4.3108586e-03   3.9559962e-03   3.8782905e-03   3.2661347e-03   3.6762932e-03   3.6452410e-03   1.7894209e-03   9.2040135e-04  -1.0095062e-04  -3.5396760e-03  -5.3762085e-03  -4.6873466e-03  -4.1481129e-03  -3.3646774e-03  -1.6416029e-03   3.3430826e-04   1.8860473e-03   1.8617820e-03   1.2864987e-03   1.8103185e-03   1.3155921e-03  -1.9906116e-05  -4.2899252e-04   2.7703213e-04  -5.5532838e-04  -3.5978289e-04   1.7856577e-03   3.2981384e-03   3.8372477e-03   4.8831431e-03   4.8570793e-03   3.4945657e-03   2.4271369e-03   3.3240703e-03   2.9791170e-03   3.5285214e-03   5.2236451e-03   6.1159158e-03   4.2308858e-03   4.1095763e-03   5.0262523e-03   4.7031494e-03   6.7708548e-03   7.2210330e-03   8.1471982e-03   8.2301228e-03   8.0853634e-03   6.5115233e-03   8.2667773e-03   1.0235310e-02   1.0996163e-02   1.1684772e-02   1.2853925e-02   1.4254001e-02   1.4259063e-02   1.3684645e-02   1.3839231e-02   1.3053336e-02   1.0727041e-02   9.5605604e-03   9.4308997e-03   8.8406909e-03   9.2404645e-03   1.0285248e-02   1.0438565e-02   9.7550178e-03   9.1405263e-03   8.5364538e-03   6.9513926e-03   7.0582445e-03   6.8833452e-03   6.0799749e-03   4.0521825e-03   4.0533949e-03   2.5313631e-03   2.3009837e-03   2.2007319e-03   2.5997397e-03   3.9586468e-03   5.6949433e-03   5.7681314e-03   5.5727204e-03   6.4772433e-03   6.2169003e-03   6.0223269e-03   7.9510468e-03   1.1264230e-02   1.4035508e-02   1.6039590e-02   1.7563951e-02   1.9003916e-02   1.9486973e-02   2.0078872e-02   2.1453543e-02   2.1708553e-02   2.1240862e-02   2.1547778e-02   1.9768835e-02   1.7575812e-02   1.6848168e-02   1.3500458e-02   1.0300480e-02   1.0176020e-02   7.9990844e-03   7.8967397e-03   8.9374940e-03   8.1227833e-03   7.2262266e-03   7.4528084e-03   4.3465754e-03   1.1891302e-03   1.5882515e-03   2.8687120e-04  -1.5258604e-03  -2.8895283e-03  -2.3322761e-03  -4.1899286e-03  -5.3290772e-03  -6.0246551e-03  -7.6450849e-03  -9.9906579e-03  -1.1728028e-02  -1.3498063e-02  -1.4650377e-02  -1.3662242e-02  -1.2438797e-02  -1.2764312e-02  -1.3005505e-02  -1.2788342e-02  -1.2784149e-02  -1.3223763e-02  -1.2158915e-02  -1.2068255e-02  -1.1689656e-02  -1.2698507e-02  -1.4278081e-02  -1.4717687e-02  -1.4730075e-02  -1.4742052e-02  -1.3753030e-02  -1.0355330e-02  -1.1179203e-02  -9.0054789e-03  -7.5416074e-03  -6.9467091e-03  -7.9236393e-03  -7.1691032e-03  -8.1342356e-03  -1.1308066e-02  -1.3324140e-02  -1.4036441e-02  -1.3402942e-02  -1.4308073e-02  -1.1737643e-02  -9.3665259e-03  -6.8455428e-03  -1.6451954e-03   8.0340209e-03   2.0704617e-02   3.9649988e-02   6.5785442e-02   9.9024147e-02   1.3790348e-01   1.7982415e-01   2.2014295e-01   2.5077508e-01   2.6484795e-01   2.6079454e-01   2.3987199e-01   2.0527460e-01   1.6431657e-01   1.2483325e-01   9.0621719e-02   6.4324065e-02   4.5807804e-02   3.4213330e-02   2.6668917e-02   2.0910516e-02   1.8471284e-02   1.5543796e-02   1.1824560e-02   8.2371967e-03   5.4893481e-03   3.1149358e-04  -4.5848792e-03  -8.3052428e-03  -1.2299537e-02  -1.6034929e-02  -1.8076978e-02  -1.9435396e-02  -2.0992295e-02  -2.3228974e-02  -2.3468185e-02  -2.4714516e-02  -2.6034589e-02  -2.6599653e-02  -2.5215048e-02  -2.5389207e-02  -2.4919606e-02  -2.3127780e-02  -2.1456610e-02  -2.0248563e-02  -1.7589365e-02  -1.4124882e-02  -1.0382959e-02  -5.8522632e-03   5.6562375e-04   7.4989390e-03   1.4007286e-02   2.0959585e-02   2.7191147e-02   3.1970594e-02   3.5295641e-02   3.7412541e-02   3.7527416e-02   3.6696763e-02   3.4562729e-02   2.9765755e-02   2.5305995e-02   2.0169467e-02   1.5710026e-02   1.1027600e-02   7.8059414e-03   4.8357919e-03   2.5241655e-03  -9.7397834e-04  -2.5532506e-03  -2.7498955e-03  -4.7783999e-03  -5.6077132e-03  -5.0322495e-03  -5.0971320e-03  -5.9971951e-03  -4.9116882e-03  -3.9641520e-03  -4.5221486e-03  -4.1556853e-03  -3.8038303e-03  -3.6963310e-03  -4.4288444e-03  -3.0106160e-03  -1.8811172e-03  -6.0678804e-04   3.6906290e-04   7.3618451e-04   1.4825979e-03   2.1293700e-03   3.0950540e-03   3.7320270e-03   5.3246177e-03   6.0331840e-03   5.2569757e-03   4.0685141e-03   3.3871291e-03   3.3943195e-03   4.3687671e-03   6.5084314e-03   7.4979900e-03   7.9155881e-03   8.2649843e-03   7.6863853e-03   6.2047790e-03   5.8479531e-03   7.1399418e-03   8.3340292e-03   9.5201305e-03   1.1519121e-02   1.2121144e-02   1.1114244e-02   8.7561531e-03   6.3877953e-03   3.6181810e-03   2.7475738e-03   3.3938405e-03   2.6106679e-03   2.3254017e-03   2.2102946e-03   2.8644085e-03   2.9749353e-03   5.6323798e-03   5.6594067e-03   4.5944346e-03   3.7278819e-03   4.9582618e-03   4.6212920e-03   6.4998160e-03   9.1069404e-03   1.1252698e-02   9.7178106e-03   7.3020280e-03   6.7779132e-03   4.8997436e-03   4.2170857e-03   5.0675758e-03   7.1914421e-03   7.8053668e-03   9.5280457e-03   9.0443110e-03   8.0412249e-03   9.7398379e-03   1.0864810e-02   9.7382788e-03   1.0374750e-02   9.9746149e-03   8.4329716e-03   5.9280904e-03   6.9228366e-03   4.5608248e-03   3.2723226e-03   2.3666756e-03   9.7849395e-04  -9.9526699e-04  -1.3863822e-03  -3.1190570e-03  -4.6502138e-03  -4.6155411e-03  -4.4342306e-03  -4.3336751e-03  -3.5627927e-03  -2.9558137e-03  -1.2794946e-03   2.2911149e-04   4.3660308e-04   1.5772718e-03   1.5881462e-03  -3.7689374e-04  -1.6039881e-03  -1.2690203e-03  -7.4867848e-04   8.2237448e-04   3.2551434e-03   4.5108646e-03   6.1964896e-03   7.8221536e-03   8.2950337e-03   8.2261286e-03   8.3781221e-03   7.7888570e-03   6.3481467e-03   4.6480559e-03   4.0908997e-03   3.4828140e-03   2.3454578e-03   1.0838890e-03   3.4093558e-05  -1.9319877e-03  -3.7010024e-03  -4.0276976e-03  -4.4941874e-03  -4.8472119e-03  -5.3752516e-03  -4.8740146e-03  -3.9657814e-03  -1.7574931e-03   1.1058130e-03   3.9976773e-03   6.2820584e-03   6.5802984e-03   6.6327917e-03   7.6982600e-03   1.0576482e-02   1.4235729e-02   1.8620748e-02   2.3663880e-02   2.8803849e-02   3.2250986e-02   3.5351790e-02   4.0231079e-02   4.4521533e-02   4.8738487e-02   5.2814877e-02   5.5675365e-02   5.7085437e-02   5.6086623e-02   5.2347947e-02   4.8054126e-02   4.3317838e-02   3.8198180e-02   3.3864348e-02   2.9300248e-02   2.4112927e-02   1.9448608e-02   1.4065878e-02   8.4756827e-03   4.3396883e-03   8.4525501e-04  -2.8034602e-03  -6.0746602e-03  -9.1127716e-03  -1.2046977e-02  -1.4024575e-02  -1.5895387e-02  -1.7105870e-02  -1.8108425e-02  -1.8665047e-02  -1.9375368e-02  -2.0578823e-02  -2.0754213e-02  -1.9483773e-02  -1.9046077e-02  -1.8257135e-02  -1.6607609e-02  -1.5780061e-02  -1.5072415e-02  -1.3341607e-02  -1.1711918e-02  -9.7777291e-03  -7.0883048e-03  -2.8454353e-03   9.2519788e-04   4.0775692e-03   8.3113018e-03   1.3371999e-02   1.7641024e-02   2.1780892e-02   2.6119365e-02   3.0123107e-02   3.3913668e-02   3.7059266e-02   4.0580576e-02   4.4153607e-02   4.6747157e-02   4.7885263e-02   4.7033571e-02   4.3595270e-02   4.0322179e-02   3.7529986e-02   3.3413219e-02   2.9511496e-02   2.5790213e-02   2.0671315e-02   1.4630696e-02   1.0228395e-02   6.6608516e-03   4.3312794e-03   4.2321718e-03   5.5355539e-03   5.9206209e-03   5.6314087e-03   5.4074547e-03   5.4733013e-03   4.6920880e-03   4.7528229e-03   7.3854772e-03   1.0671396e-02   1.2183795e-02   1.4259735e-02   1.7251452e-02   1.8658030e-02   1.9860256e-02   2.0818499e-02   1.9726977e-02   1.7376126e-02   1.6144472e-02   1.4121054e-02   1.2585082e-02   1.2045794e-02   1.0388689e-02   8.4162044e-03   7.5673145e-03   5.6824974e-03   5.6083011e-03   6.0987981e-03   4.9149793e-03   4.6493640e-03   3.9222680e-03   1.4909560e-03   1.0426309e-04  -1.6953506e-03  -4.8589464e-03  -5.5017112e-03  -7.7635566e-03  -8.5294921e-03  -9.6035412e-03  -9.2499541e-03  -1.0791057e-02  -1.0954949e-02  -1.1824116e-02  -1.0748975e-02  -1.2069040e-02  -1.0800722e-02  -1.0265282e-02  -1.0480431e-02  -1.0133350e-02  -7.9985047e-03  -8.8505671e-03  -7.8751837e-03  -7.1240306e-03  -6.0588322e-03  -2.8989307e-03   1.1260817e-04   2.6754052e-03   5.8650482e-03   8.7589155e-03   1.0925676e-02   1.5666097e-02   1.8632357e-02   2.2003615e-02   2.5418555e-02   2.8064972e-02   3.0386038e-02   3.5192056e-02   3.8817004e-02   4.1404763e-02   4.1856537e-02   4.0567091e-02   3.8760520e-02   3.6532260e-02   3.4156290e-02   3.2122497e-02   2.9765259e-02   2.6494300e-02   2.4050267e-02   1.9538947e-02   1.4278414e-02   9.3105812e-03   4.8045572e-03   1.1679152e-04  -3.4551478e-03  -6.0756854e-03  -6.6866868e-03  -8.1257474e-03  -1.0666234e-02  -1.1299199e-02  -1.1844890e-02  -1.3615756e-02  -1.3142580e-02  -1.2213024e-02  -1.2162281e-02  -1.1198973e-02  -1.0136508e-02  -9.0876187e-03  -7.9143970e-03  -6.1511488e-03  -4.0987374e-03  -1.1661458e-03   4.2290646e-04   2.0742898e-04   2.5107524e-03   4.8673223e-03   4.8683679e-03   5.3749110e-03   7.9165048e-03   8.0557136e-03   7.5326981e-03   8.3230166e-03   6.9754238e-03   6.5665132e-03   6.1598371e-03   6.0033749e-03   7.3414868e-03   1.0194488e-02   1.0096730e-02   1.0331086e-02   1.0751421e-02   9.6157489e-03   9.0050269e-03   1.0318385e-02   1.1575634e-02   1.1813944e-02   1.1768718e-02   1.2081383e-02   1.2942186e-02   1.4249631e-02   1.5391799e-02   1.6753250e-02   1.7127449e-02   1.5692359e-02   1.3485751e-02   1.3572650e-02   1.3482317e-02   1.1336488e-02   1.0316744e-02   9.5587657e-03   7.2431323e-03   5.3978630e-03   6.4013312e-03   7.5435190e-03   8.0508508e-03   9.6489420e-03   1.0707760e-02   1.1317778e-02   1.1048520e-02   1.2122376e-02   1.0252944e-02   9.7130731e-03   1.0233029e-02   1.1844705e-02   1.2334021e-02   1.2654133e-02   1.3199031e-02   1.1983382e-02   1.1629424e-02   1.1413318e-02   1.1893432e-02   9.6820214e-03   1.0662106e-02   1.2083410e-02   1.0678244e-02   9.9646177e-03   1.1534259e-02   1.0850798e-02   8.1755295e-03   7.4170304e-03   8.2745094e-03   8.2166928e-03   7.4640612e-03   7.5517567e-03   1.0070673e-02   1.1164188e-02   1.1470261e-02   1.1180483e-02   1.1492397e-02   9.6534692e-03   7.6239183e-03   7.6287061e-03   7.8699230e-03   6.2328755e-03   7.1771856e-03   6.6614053e-03   5.2132189e-03   5.2961131e-03   6.3161200e-03   6.9830252e-03   6.2331512e-03   4.7656823e-03   2.2455099e-03   1.2209072e-05  -1.3747219e-03  -2.7741780e-03  -3.6432701e-03  -4.2188862e-03  -5.2255269e-03  -8.8817234e-03  -1.0263519e-02  -1.0446554e-02  -1.0826316e-02  -1.0667438e-02  -1.0372004e-02  -9.5570355e-03  -1.0320262e-02  -1.0445588e-02  -1.0710765e-02  -1.2925170e-02  -1.3815483e-02  -1.1366665e-02  -8.8694199e-03  -7.6543608e-03  -6.0845651e-03  -4.4936801e-03  -5.1071009e-03  -4.5415681e-03  -2.6688884e-03  -8.9874385e-05   2.5018167e-03   2.7851185e-03   2.5364194e-03   7.0457159e-04   1.0850491e-03   7.0681698e-04   1.3701326e-03   1.3021307e-03   1.9206263e-03   3.3888627e-03   2.3177373e-03   1.5126542e-03   1.0179538e-03   1.6311356e-03   8.1726626e-04   1.5322442e-03   3.4450952e-03   4.7155641e-03   5.5899044e-03   4.9999576e-03   6.5468738e-03   8.8514345e-03   9.9773112e-03   1.0162271e-02   1.0550761e-02   9.0748400e-03   9.5569287e-03   1.1573495e-02   1.2463322e-02   1.4303998e-02   1.4283598e-02   1.2619366e-02   1.1455454e-02   1.2173898e-02   1.2995041e-02   1.5925217e-02   1.5593186e-02   1.4728754e-02   1.2802488e-02   1.0370095e-02   9.7166588e-03   1.0190783e-02   1.1313665e-02   1.2845433e-02   1.3504927e-02   1.2050531e-02   1.1106300e-02   9.2491265e-03   9.6225059e-03   1.0260660e-02   1.2836303e-02   1.5534731e-02   1.6774481e-02   1.7170994e-02   1.7770443e-02   1.6508657e-02   1.7365516e-02   1.7717089e-02   1.7618549e-02   1.6385507e-02   1.6876453e-02   1.4788004e-02   1.5949957e-02   1.6466479e-02   1.8165349e-02   2.0062365e-02   2.1543467e-02   2.1508819e-02   2.3018846e-02   2.4512302e-02   2.5019771e-02   2.6514340e-02   2.7210963e-02   2.6722233e-02   2.5627062e-02   2.5287370e-02   2.6302602e-02   2.7851685e-02   2.7479943e-02   2.5377392e-02   2.2357917e-02   1.8282401e-02   1.4912255e-02   1.2723311e-02   1.2997462e-02   1.2851732e-02   1.2229462e-02   9.6973666e-03   1.0126326e-02   9.6611997e-03   8.0944009e-03   6.8119719e-03   7.2427783e-03   5.3476738e-03   4.6604779e-03   5.0086230e-03   4.0162321e-03   3.6301056e-03   2.4186364e-03   1.0242001e-03  -2.3113173e-03  -4.3656196e-03  -6.9059743e-03  -6.9254533e-03  -7.5883411e-03  -4.9717209e-03  -2.9258422e-03  -1.6072246e-03  -1.9741382e-03  -2.9194373e-03  -4.5506895e-03  -5.0491254e-03  -3.9560400e-03  -2.6082234e-03  -9.0642872e-04   6.8292111e-04   1.2230917e-03  -2.7026554e-04  -9.3763882e-05  -3.6640104e-04  -2.2368906e-03  -3.6988525e-03  -4.2470550e-03  -7.7504352e-03  -8.4741625e-03  -7.7838047e-03  -6.5057813e-03  -6.1571820e-03  -4.9289502e-03  -5.2269090e-03  -6.5356416e-03  -7.6474148e-03  -7.7585342e-03  -7.9463720e-03  -8.4982858e-03  -7.7993786e-03  -8.4794537e-03  -8.5993058e-03  -8.1771797e-03  -7.5442463e-03  -6.8911676e-03  -5.9727223e-03  -4.7689047e-03  -5.4037853e-03  -4.2860484e-03  -1.9030081e-03  -9.6516627e-04  -8.0233144e-04   9.7091260e-04   1.2319668e-03  -5.7518511e-04   6.4621360e-04   1.9149149e-03   2.3380298e-03   2.6960276e-03   3.8058335e-03   4.1533141e-03   4.7404476e-03   6.3885158e-03   7.3458401e-03   8.2030178e-03   8.7044740e-03   8.4390790e-03   7.7401658e-03   8.0035273e-03   8.8314741e-03   9.0684440e-03   9.0681395e-03   1.0260952e-02   1.0957551e-02   1.0767979e-02   1.0851586e-02   1.2120136e-02   1.3036278e-02   1.3399857e-02   1.2768407e-02   1.2067649e-02   1.1042850e-02   9.3275686e-03   8.2480598e-03   8.5962302e-03   9.2235907e-03   8.4860592e-03   7.8333369e-03   7.2697535e-03   6.0916643e-03   3.9737870e-03   2.8872669e-03   1.7183409e-03  -9.6822188e-05  -1.5834730e-03  -1.9205646e-03  -2.4169931e-03  -3.3318126e-03  -4.0036542e-03  -5.1001931e-03  -5.4892995e-03  -5.6922151e-03  -6.1589378e-03  -6.3941297e-03  -6.5546588e-03  -7.9038626e-03  -9.1224342e-03  -9.5137956e-03  -9.7969877e-03  -1.0166275e-02  -1.0311479e-02  -1.0756598e-02  -1.2114341e-02  -1.3901287e-02  -1.4861923e-02  -1.6454617e-02  -1.7516727e-02  -1.7207374e-02  -1.7692271e-02  -1.8351457e-02  -1.8015382e-02  -1.8375960e-02  -1.9070993e-02  -1.7943277e-02  -1.6930276e-02  -1.6015206e-02  -1.4156303e-02  -1.1582828e-02  -8.4981735e-03  -4.4936055e-03  -3.2704704e-04   4.7870434e-03   9.3721763e-03   1.4596737e-02   1.8714874e-02   2.4133263e-02   3.0118991e-02   3.5848903e-02   4.0118512e-02   4.4922573e-02   4.8895655e-02   5.0648066e-02   5.2205435e-02   5.3386998e-02   5.4375203e-02   5.4180189e-02   5.5614950e-02   5.8022550e-02   6.0447752e-02   6.2573168e-02   6.5042551e-02   6.8002347e-02   7.0487451e-02   7.4135298e-02   7.8190368e-02   8.1162416e-02   8.2737948e-02   8.4148671e-02   8.3919756e-02   8.2344093e-02   8.0544227e-02   7.7872267e-02   7.4154360e-02   7.1130922e-02   6.8699310e-02   6.5540791e-02   6.1644928e-02   5.8298920e-02   5.4245475e-02   5.0665988e-02   4.9315503e-02   4.8852214e-02   4.8577659e-02   4.8767216e-02   4.9209377e-02   4.9482964e-02   4.9901139e-02   4.9952432e-02   5.0096041e-02   4.9260893e-02   4.7218124e-02   4.5744734e-02   4.4633444e-02   4.2135704e-02   3.9998915e-02   3.7823761e-02   3.4408945e-02   3.0340306e-02   2.7504826e-02   2.3932214e-02   1.9814012e-02   1.6660630e-02   1.3544668e-02   9.7778371e-03   7.0623961e-03   5.0229942e-03   2.4531038e-03  -1.6024277e-04  -2.7191621e-03  -5.2474356e-03  -6.9784522e-03  -8.4284797e-03  -9.6965002e-03  -1.0852091e-02  -1.2250803e-02  -1.4096086e-02  -1.6378908e-02  -1.7891168e-02  -1.8175018e-02  -1.8747785e-02  -1.9159796e-02  -1.9661023e-02  -1.9292573e-02  -2.0065091e-02  -2.0230459e-02  -1.9737868e-02  -1.9039657e-02  -1.9179109e-02  -1.8538449e-02  -1.7989332e-02  -1.7285793e-02  -1.6442955e-02  -1.5854706e-02  -1.5522820e-02  -1.4294522e-02  -1.3693707e-02  -1.3025675e-02  -1.2118298e-02  -1.0956574e-02  -1.0539600e-02  -1.0068844e-02  -9.1807228e-03  -8.7201480e-03  -8.4999584e-03  -7.7669873e-03  -6.5520105e-03  -5.6410661e-03  -4.0243414e-03  -2.3837295e-03  -1.7512720e-03  -1.5681532e-03  -8.7634184e-04  -3.5331547e-04   2.3817083e-05   5.4878473e-04   1.1867550e-03   1.0194156e-03   8.0227471e-04   1.4845030e-03   2.3181654e-03   2.7963292e-03   4.0074720e-03   4.6798736e-03   4.5488432e-03   4.6725451e-03   5.8111726e-03   6.6561350e-03   7.4718529e-03   8.3593218e-03   9.0226903e-03   9.2174683e-03   9.4703320e-03   1.0278840e-02   1.0811738e-02   1.1760308e-02   1.1364512e-02   1.1629928e-02   1.1383382e-02   1.1941504e-02   1.2130460e-02   1.3274017e-02   1.3955781e-02   1.4645704e-02   1.5087216e-02   1.5144944e-02   1.5501020e-02   1.5310320e-02   1.5477768e-02   1.5624165e-02   1.5756109e-02   1.4436114e-02   1.3564844e-02   1.3341767e-02   1.2852930e-02   1.2418859e-02   1.3747522e-02   1.4213394e-02   1.3430605e-02   1.2572725e-02   1.2470041e-02   1.1079365e-02   1.0247849e-02   9.9476735e-03   9.4337776e-03   8.1919036e-03   7.7800725e-03   7.2052160e-03   5.7346254e-03   4.4290698e-03   2.9798400e-03   1.7342097e-03   9.1358475e-04   5.8384248e-04   8.7709399e-04   7.9800436e-04   1.2005081e-03   8.4022700e-04   1.1671819e-03   8.6028948e-04   1.3633754e-03   1.3260424e-03   1.4374652e-03   1.0037842e-03   1.8399841e-03   2.6274277e-03   2.8144336e-03   3.8617851e-03   4.6751749e-03   3.9738960e-03   3.6266373e-03   4.2302542e-03   4.2187155e-03   5.0989338e-03   6.0797315e-03   6.4162585e-03   7.1498225e-03   8.5720484e-03   8.3362383e-03   9.5393411e-03   1.0544891e-02   1.0421101e-02   9.6898317e-03   9.7108553e-03   8.3871788e-03   7.6605316e-03   7.7535563e-03   7.3924981e-03   7.6486212e-03   7.1012659e-03   6.9987436e-03   5.5979546e-03   4.3307792e-03   3.2761193e-03   2.9704810e-03   2.1089168e-03   1.3857028e-03   6.6026180e-04  -5.0746443e-04  -1.2289368e-03  -1.1189192e-03  -1.2991643e-03  -1.4352507e-03  -1.5444412e-03  -1.6293527e-03  -2.5307459e-03  -2.8173984e-03  -3.0285616e-03  -3.3077606e-03  -3.5274140e-03  -3.6707818e-03  -3.1276655e-03  -2.7295816e-03  -2.7392398e-03  -3.1281986e-03  -3.1517863e-03  -3.3796205e-03  -3.6209545e-03  -3.2957046e-03  -3.0472272e-03  -2.6797158e-03  -2.4955106e-03  -1.8927622e-03  -1.2698883e-05   1.8813834e-03   4.3872142e-03   6.5662961e-03   7.4767519e-03   7.1355352e-03   6.8594563e-03   5.6833392e-03   4.9364784e-03   6.0978027e-03   6.3806765e-03   7.8160882e-03   9.0053235e-03   9.0808471e-03   8.1412083e-03   7.5415932e-03   5.5696984e-03   3.4528605e-03   1.7592670e-03  -6.4984809e-04  -2.3466452e-03  -4.4346755e-03  -5.0319261e-03  -5.8218047e-03  -5.0605959e-03  -4.3625523e-03  -3.2162674e-03  -2.8507333e-03  -1.6581175e-03  -8.8667125e-04  -1.8071748e-04   6.0747244e-04   1.3268418e-03   1.9050547e-03   2.7051945e-03   3.6061612e-03   5.5920663e-03   6.8588719e-03   8.6442766e-03   1.0874020e-02   1.2487900e-02   1.3989576e-02   1.6932547e-02   1.8970808e-02   2.0467425e-02   2.2215883e-02   2.3348606e-02   2.2368044e-02   2.1164884e-02   1.8672293e-02   1.6823822e-02   1.4174170e-02   1.1727149e-02   1.0360864e-02   9.4536352e-03   8.4579662e-03   8.5303566e-03   8.8865204e-03   8.7388827e-03   9.8869184e-03   1.0888543e-02   1.0116212e-02   9.3238309e-03   9.4069787e-03   7.8531022e-03   5.9715752e-03   5.5118167e-03   5.9760782e-03   5.2977022e-03   5.3183978e-03   5.1604512e-03   4.6824937e-03   2.5483378e-03   1.6444271e-04  -1.5062796e-03  -3.2828638e-03  -5.1819235e-03  -6.6188527e-03  -7.4535781e-03  -8.1940287e-03  -9.1177002e-03  -1.0192250e-02  -9.8899588e-03  -9.4201285e-03  -1.0043021e-02  -1.0295599e-02  -1.0119731e-02  -1.0129968e-02  -1.0629165e-02  -1.0858458e-02  -1.1242550e-02  -1.1152819e-02  -1.0825806e-02  -1.0938574e-02  -1.0137953e-02  -8.7013937e-03  -8.3028740e-03  -8.1531037e-03  -6.8865602e-03  -7.3499766e-03  -8.0379186e-03  -7.9978023e-03  -7.8910744e-03  -7.7047091e-03  -6.5664836e-03  -4.8286355e-03  -2.3408657e-03   1.2798803e-04   2.1830247e-03   5.5733519e-03   7.4558142e-03   9.0023046e-03   1.0110983e-02   1.1524580e-02   1.2190800e-02   1.3691820e-02   1.4615999e-02   1.6452749e-02   1.7966009e-02   1.9542356e-02   2.3257575e-02   2.2761378e-02   2.3564960e-02   2.7720227e-02   3.0487088e-02   3.1538186e-02   3.7036635e-02   3.9577314e-02   3.9750202e-02   4.0422881e-02   4.0496607e-02   4.0086968e-02   4.0526987e-02   3.9098177e-02   3.8552414e-02   3.8115955e-02   3.6744867e-02   3.5511905e-02   3.4785516e-02   3.4148850e-02   3.2363541e-02   3.2340450e-02   3.1977783e-02   3.1420545e-02   3.0307836e-02   3.0723724e-02   2.9452984e-02   2.7910393e-02   2.6778930e-02   2.5678663e-02   2.5179322e-02   2.5359300e-02   2.5234322e-02   2.4846609e-02   2.4096935e-02   2.2781951e-02   2.1034876e-02   1.9757635e-02   1.9066647e-02   1.8347364e-02   1.7079042e-02   1.5946128e-02   1.4201017e-02   1.3696234e-02   1.1749314e-02   1.0665961e-02   1.0197736e-02   1.0168995e-02   8.6056293e-03   8.3425588e-03   7.6203020e-03   6.5900766e-03   5.3558192e-03   3.3608108e-03   2.1937614e-03   9.2938940e-04   8.1036864e-04   8.3372293e-04   1.5157900e-03   1.2796993e-03   9.8235128e-04   4.1900854e-04  -4.4182431e-04  -1.0819157e-03  -9.0001801e-04  -1.0298040e-03  -1.6761592e-03  -1.6583452e-03  -1.9123901e-03  -2.4198784e-03  -2.7587521e-03  -2.9943106e-03  -3.7400514e-03  -4.3056523e-03  -5.1000355e-03  -5.7972247e-03  -6.4068653e-03  -7.1895537e-03  -7.5199968e-03  -7.2727955e-03  -7.3198236e-03  -7.4764625e-03  -7.1365548e-03  -7.2989264e-03  -7.3868536e-03  -7.5834674e-03  -6.8807674e-03  -6.5820142e-03  -6.4199858e-03  -6.4922818e-03  -5.9268752e-03  -6.4048666e-03  -6.6117620e-03  -6.2162070e-03  -6.0364812e-03  -6.0272299e-03  -5.7785141e-03  -5.1482197e-03  -5.0703916e-03  -5.0427934e-03  -4.8936950e-03  -4.4833340e-03  -4.2237020e-03  -3.8429308e-03  -3.0920241e-03  -2.6950405e-03  -2.4931470e-03  -1.7852487e-03  -1.1808471e-03  -1.1088281e-03  -4.8700423e-04  -3.6935314e-04  -6.3338060e-04  -4.6165559e-04   3.5783751e-05   5.7455991e-04   7.6261437e-04   1.5250002e-03   1.8132421e-03   2.1746150e-03   1.8833865e-03   2.2061921e-03   1.8084288e-03   1.5604187e-03   1.4724817e-03   1.7344189e-03   2.0825028e-03   2.1413949e-03   2.8961044e-03   3.0169795e-03   2.5693928e-03   2.5281945e-03   3.3812042e-03   3.4629481e-03   3.9218514e-03   4.7697475e-03   4.8136857e-03   4.5244615e-03   4.1715485e-03   3.8039296e-03   3.4774874e-03   3.9221296e-03   3.8256244e-03   4.1209067e-03   4.1940218e-03   4.2574304e-03   3.8445751e-03   3.7891375e-03   4.0951206e-03   4.2217095e-03   4.4159653e-03   4.7399773e-03   6.1129162e-03   5.5064987e-03   5.4026908e-03   5.4236302e-03   5.1577932e-03   3.6943333e-03   3.6751378e-03   3.4849945e-03   2.7122561e-03   2.4029727e-03   2.3314009e-03   2.0093985e-03   1.3797271e-03   1.5156739e-03   1.6590812e-03   1.5464117e-03   1.5002706e-03   1.7568027e-03   1.4974335e-03   1.3915669e-03   8.7713582e-04   7.0116970e-04   4.9439667e-04   7.9997407e-04   8.9413526e-04   1.5962586e-03   1.7801264e-03   2.2407022e-03   2.3060771e-03   1.6471338e-03   1.1471113e-03   1.2336515e-03   8.7912325e-04   9.7818156e-04   1.3008309e-03   1.2981121e-03   1.1350401e-03   1.1929712e-03   5.9631624e-04   5.2278642e-04   7.6257202e-04   3.2239157e-04   6.7648668e-04   1.1538985e-03   1.2761296e-03   1.3138382e-03   1.8973530e-03   1.3622294e-03   8.1957334e-04   7.5896195e-04   1.3728128e-04   1.9659781e-04   6.3394050e-04   1.3591613e-03   1.5211463e-03   2.0713992e-03   2.4444666e-03   2.4563141e-03   2.1012338e-03   2.0206152e-03   1.9863914e-03   1.8491510e-03   1.6241687e-03   1.5567260e-03   1.7735855e-03   1.7554072e-03   1.3956272e-03   1.4735540e-03   1.8370692e-03   1.7202105e-03   1.8879092e-03   2.0225816e-03   2.4666809e-03   2.1419499e-03   2.1596729e-03   2.0415579e-03   1.9978343e-03   2.0115759e-03   2.2276721e-03   2.1153581e-03   1.6954704e-03   1.1953060e-03   4.2778741e-04   2.8862747e-05   4.6807274e-04   1.1001643e-03   1.9317141e-03   2.2209560e-03   2.6752112e-03   2.3181569e-03   2.0605229e-03   1.4996976e-03   1.7083216e-03   1.1622235e-03   6.3633835e-04   2.0586517e-04  -3.8523342e-04  -1.1581685e-03  -1.2334248e-03  -1.1795031e-03  -1.2861643e-03  -8.5939582e-04  -1.2781864e-03
  -7.8839913e-03  -7.6299945e-03  -5.9161622e-03  -5.6420041e-03  -4.7184620e-03  -4.0441499e-03  -4.1807195e-03  -4.4536099e-03  -4.1264584e-03  -3.0660791e-03  -1.3190791e-03   7.6626995e-04   2.5286619e-03   5.7347247e-03   7.4407662e-03   6.5796344e-03   5.5304027e-03   6.9796215e-03   5.6998399e-03   5.1378250e-03   7.6017548e-03   9.2728287e-03   8.2450351e-03   8.6725239e-03   9.8809247e-03   1.0225484e-02   1.1309423e-02   1.2262551e-02   1.2495750e-02   1.1739303e-02   1.1434431e-02   1.1037621e-02   1.1037124e-02   1.2836778e-02   1.5654352e-02   1.7764410e-02   1.9226223e-02   1.9998241e-02   1.9658632e-02   1.9055153e-02   1.7344960e-02   1.4147360e-02   1.3409038e-02   1.2349215e-02   1.0886932e-02   9.9638011e-03   1.0702312e-02   9.8375268e-03   8.7033151e-03   6.5957787e-03   3.0446345e-03   2.7931464e-03   2.4902476e-03   1.3697969e-03   6.1823968e-04   1.2554889e-03  -7.6111563e-04  -6.1077437e-04  -1.0785209e-03   4.2956370e-04   6.4511535e-04   1.3378368e-03   6.0141412e-04   1.3340585e-03   4.8981391e-04   1.6955144e-03   1.0336683e-03   6.8580941e-05  -9.2646055e-04  -8.0136920e-04  -8.3809396e-04   7.5573459e-04   2.9447266e-03   5.1702200e-03   6.6330038e-03   7.7619916e-03   9.1836316e-03   8.9892515e-03   9.4707723e-03   9.9529466e-03   1.0196820e-02   9.6900194e-03   1.1423279e-02   1.0856207e-02   1.1593555e-02   1.4030264e-02   1.5871698e-02   1.7265394e-02   2.0878259e-02   2.0885233e-02   1.9092249e-02   1.8159059e-02   1.7424302e-02   1.5852067e-02   1.5105624e-02   1.4484372e-02   1.4372324e-02   1.3568578e-02   1.1796404e-02   1.0271360e-02   8.2897641e-03   5.1168488e-03   1.8184459e-03  -5.0229482e-04  -1.7031911e-03  -9.2068259e-04   4.1178228e-04   1.7674061e-04   1.6719075e-04  -1.3255648e-03  -3.9855425e-03  -5.2262180e-03  -5.4208179e-03  -6.0943921e-03  -5.9286128e-03  -7.2068109e-03  -7.1438866e-03  -5.1371347e-03  -4.4681579e-03  -4.7725610e-03  -3.8871437e-03  -5.2568286e-03  -7.9456439e-03  -9.9927260e-03  -1.3243040e-02  -1.3182906e-02  -1.6325705e-02  -1.8634419e-02  -1.8301869e-02  -1.5624889e-02  -1.6754585e-02  -1.5503172e-02  -1.4701694e-02  -1.3801593e-02  -1.2483489e-02  -1.0529035e-02  -1.0553709e-02  -1.0687806e-02  -1.1577333e-02  -1.2940065e-02  -1.3448399e-02  -1.1623794e-02  -1.1925384e-02  -8.7054951e-03  -5.1429021e-03  -2.2649356e-03   1.6324531e-03   7.4415165e-03   8.3582717e-03   9.1578464e-03   1.1457987e-02   1.2314110e-02   1.1998718e-02   1.3210859e-02   1.5158633e-02   1.5702884e-02   1.6674671e-02   1.8128497e-02   1.7892583e-02   1.9334696e-02   1.8992554e-02   1.9903630e-02   2.0471896e-02   2.5171236e-02   2.9218856e-02   3.3530539e-02   3.5211993e-02   3.8613656e-02   3.9724901e-02   3.9750281e-02   4.2208126e-02   4.6515937e-02   4.9086820e-02   5.1034084e-02   5.2552665e-02   5.2606057e-02   5.2685683e-02   5.0589044e-02   4.9268968e-02   4.8543613e-02   4.5991799e-02   4.3320616e-02   4.4505923e-02   4.3967978e-02   4.1113109e-02   3.9931051e-02   3.9169407e-02   3.5643322e-02   3.2047479e-02   3.0086183e-02   2.8265331e-02   2.5513103e-02   2.4944804e-02   2.5121493e-02   2.4425395e-02   2.1949863e-02   1.9904668e-02   1.8679637e-02   1.8737176e-02   1.8110723e-02   1.8105351e-02   1.6676288e-02   1.4103232e-02   1.2377298e-02   1.0466285e-02   9.9214564e-03   1.1770626e-02   1.1902400e-02   8.8721306e-03   6.6840156e-03   3.6352490e-03  -1.5876215e-03  -4.6883739e-03  -6.1331066e-03  -7.1368678e-03  -8.2635351e-03  -8.0176789e-03  -8.7431041e-03  -1.0729098e-02  -1.2377073e-02  -1.2638880e-02  -1.3905772e-02  -1.4067510e-02  -1.1145504e-02  -9.4146398e-03  -6.5272039e-03  -4.0110143e-03  -2.5557484e-03  -2.7538784e-03  -1.4431615e-03  -1.4688743e-03   9.9811526e-04   4.2111071e-03   5.6692324e-03   5.3157692e-03   7.1668619e-03   6.7067741e-03   5.5089936e-03   6.0795896e-03   7.9524236e-03   6.4391921e-03   5.9258389e-03   5.0945878e-03   2.9366472e-03   7.8573568e-04  -1.1779431e-04  -2.5115102e-03  -4.2475521e-03  -4.7026779e-03  -4.9399492e-03  -4.4014041e-03  -2.9167471e-03  -9.6190100e-04  -9.9543590e-04  -1.8124063e-03  -2.2391293e-03  -2.4532964e-03  -2.8057958e-03  -8.2373668e-04   1.4622935e-03   1.9408769e-03   2.7430913e-03   2.3994060e-03   2.6522653e-03   3.6898437e-03   4.5038014e-03   5.7077419e-03   8.1884938e-03   7.7161945e-03   7.1304547e-03   8.1571809e-03   8.6903970e-03   1.0196035e-02   1.2548151e-02   1.4068312e-02   1.5367751e-02   1.6366825e-02   1.5913640e-02   1.6951943e-02   1.8708613e-02   1.8150715e-02   1.8536032e-02   1.7233234e-02   1.5466157e-02   1.3857389e-02   1.2862403e-02   1.0946133e-02   1.1414906e-02   1.0456454e-02   8.5780495e-03   8.0473052e-03   9.2647473e-03   8.7399675e-03   7.6198390e-03   6.3989387e-03   6.2523002e-03   5.4198649e-03   5.2655323e-03   5.5659492e-03   5.7164749e-03   4.0590186e-03   1.6791740e-03   9.9296575e-04   1.2925731e-03   1.0317554e-03   9.1798821e-04   1.3947999e-04  -2.0116945e-03  -3.0864911e-03  -2.2859160e-03  -3.1935770e-03  -3.7037571e-03  -3.3693429e-03  -5.0351048e-03  -5.5381272e-03  -4.9875400e-03  -4.4283554e-03  -4.2555948e-03  -4.6897171e-03  -6.7592970e-03  -6.9927456e-03  -6.7948882e-03  -8.4725804e-03  -8.6281772e-03  -7.3745539e-03  -8.3556995e-03  -1.0184751e-02  -1.0056208e-02  -9.7343867e-03  -1.0265444e-02  -1.0690744e-02  -8.2148918e-03  -4.4967461e-03  -1.8752780e-03  -2.3075088e-03  -2.1575470e-03  -1.7922141e-03  -3.2053956e-03  -5.1125857e-03  -3.2493113e-03  -1.5455845e-03  -2.7976353e-03  -2.2494041e-03  -2.5305516e-04  -1.9275634e-03  -1.7995464e-03  -1.1044054e-03  -2.7435012e-03  -3.8504441e-03  -2.0597443e-03  -3.0072676e-03  -4.3719126e-03  -2.6320533e-03  -2.5663152e-03  -3.7203283e-03  -2.4657961e-03  -3.1595979e-04   1.5847482e-03   7.2703565e-03   1.6295549e-02   2.7676696e-02   4.1306245e-02   5.5206813e-02   6.8126303e-02   7.7523876e-02   8.2892999e-02   8.3705469e-02   7.8004601e-02   6.7281316e-02   5.5155623e-02   4.1960808e-02   2.8403850e-02   1.7907411e-02   1.0613699e-02   4.9334679e-03  -2.8816255e-05  -2.6560813e-03  -2.9168553e-03  -5.2125905e-03  -7.9146386e-03  -9.1231270e-03  -1.0987196e-02  -1.4211938e-02  -1.5208310e-02  -1.4977454e-02  -1.4146697e-02  -1.4809854e-02  -1.4840198e-02  -1.3648480e-02  -1.1903775e-02  -1.0772464e-02  -6.4379043e-03  -8.4685145e-04   4.0022104e-03   9.4977614e-03   1.7493933e-02   2.6730760e-02   3.5816504e-02   4.8008318e-02   6.0008939e-02   6.9650886e-02   7.5262030e-02   7.7618022e-02   7.3513663e-02   6.4558019e-02   5.3535859e-02   4.2490652e-02   3.1532659e-02   2.1874350e-02   1.6014760e-02   1.1948836e-02   8.2132287e-03   5.7101353e-03   4.5018923e-03   3.0186289e-03   1.8633665e-03   2.0610429e-03   2.3807009e-03   1.0663324e-03   3.1750257e-03   3.5125225e-03   2.3163792e-03   2.0527572e-03   3.9813130e-03   2.0656964e-03   2.4725247e-03   5.2957535e-03   6.6472559e-03   6.6016340e-03   8.6304973e-03   9.0292307e-03   1.0145685e-02   1.0043465e-02   1.0165926e-02   1.0398359e-02   9.9183297e-03   6.5683748e-03   5.6544383e-03   6.5176153e-03   6.3705949e-03   6.7502579e-03   7.1599056e-03   7.7444104e-03   4.6132464e-03   3.1510717e-03   3.4740332e-03   4.8650743e-03   3.5055212e-03   4.8500164e-03   4.3995690e-03   2.6320113e-03   4.2076581e-04  -1.2947693e-04  -1.4254040e-03  -3.2335298e-03  -2.9802167e-03  -2.0357306e-03  -1.2229687e-03   3.4953143e-04   1.6366319e-03   7.3834153e-04  -1.3584692e-03  -2.1718780e-03  -2.0544856e-03  -3.0770446e-03  -2.1173932e-03  -1.5614966e-03  -2.2048766e-03  -3.5847017e-03  -4.4631950e-03  -6.0727748e-03  -4.3333194e-03  -1.5446268e-03  -2.0006995e-05   1.3881002e-04  -1.5181900e-03  -3.9666877e-03  -7.3439732e-03  -1.0022901e-02  -1.0049128e-02  -7.8122033e-03  -6.1558133e-03  -6.0857802e-03  -3.1702050e-03  -9.5289729e-04  -4.7064038e-04   1.1380751e-04   3.4228024e-03   5.2045802e-03   9.1742473e-03   1.3634523e-02   1.8170734e-02   2.0526513e-02   2.3346202e-02   2.2169738e-02   2.1453496e-02   1.9891101e-02   1.9468571e-02   1.8151140e-02   1.9370772e-02   1.9473563e-02   1.8428640e-02   1.7727162e-02   1.5011666e-02   9.7055960e-03   7.5050120e-03   5.9420242e-03   3.0007026e-03   1.5147099e-03   1.6417912e-03  -9.1455678e-04  -3.2762816e-03  -4.1444303e-03  -3.9857406e-03  -2.8333100e-03  -2.6421825e-03  -1.9356378e-03  -9.3186362e-05   2.1382517e-03   4.3019514e-03   6.9572627e-03   8.8009262e-03   9.6089758e-03   8.3463772e-03   8.1680637e-03   8.0323280e-03   5.7351239e-03   4.8709659e-03   5.2880918e-03   3.3339347e-03   2.3611384e-04   6.6887772e-04  -4.9349349e-04  -2.6265022e-03  -4.1221913e-03  -3.1257706e-03  -3.9646842e-03  -5.2883829e-03  -5.3372611e-03  -5.2450332e-03  -6.6401472e-03  -7.4335866e-03  -9.2410439e-03  -1.0609690e-02  -9.9803880e-03  -1.0195716e-02  -1.0262857e-02  -8.5596719e-03  -9.0658295e-03  -1.1355661e-02  -1.1118769e-02  -8.5960988e-03  -6.2535599e-03  -4.2647053e-03  -1.7716238e-03  -6.3010812e-05  -4.3706584e-04   3.6225741e-04   3.7810809e-03   5.4660204e-03   7.5251514e-03   9.8127529e-03   1.0532711e-02   1.0225639e-02   1.2999594e-02   1.6020939e-02   1.7755229e-02   1.9435165e-02   2.1336762e-02   2.1351163e-02   2.0907563e-02   2.1256125e-02   2.1320249e-02   2.2380118e-02   2.2842601e-02   2.1940160e-02   2.1078249e-02   2.0601994e-02   1.9214856e-02   1.9625118e-02   2.0906815e-02   2.1651451e-02   2.4290751e-02   2.8413882e-02   3.1129032e-02   3.3942250e-02   3.8548443e-02   4.1144516e-02   4.5629558e-02   4.8561682e-02   5.4267904e-02   6.0954365e-02   6.7174941e-02   6.8809167e-02   7.2169632e-02   7.1822620e-02   6.6902217e-02   6.0615608e-02   5.3755330e-02   4.5605200e-02   3.7222157e-02   3.0739760e-02   2.6821555e-02   2.3770312e-02   2.2069607e-02   1.9467223e-02   1.7197069e-02   1.3833332e-02   1.0206247e-02   6.9665884e-03   7.1991529e-03   7.4743148e-03   6.6618839e-03   6.2555367e-03   5.4559002e-03   1.8598227e-03  -5.2652522e-04  -1.0784021e-04  -6.3909706e-04  -5.1885284e-04   1.9259155e-04  -2.4786318e-04  -1.7191403e-03  -1.6688001e-03  -2.7439896e-03  -3.2427460e-03  -3.3245078e-03  -2.9561454e-03  -2.9271958e-03  -3.8724998e-03  -4.2740520e-03  -4.1694497e-03  -5.5279253e-03  -5.9070353e-03  -6.1382354e-03  -6.9053867e-03  -9.4139877e-03  -9.8927891e-03  -1.0055055e-02  -1.0399669e-02  -1.1480200e-02  -1.0912435e-02  -1.1230504e-02  -1.3390983e-02  -1.3688043e-02  -1.2428264e-02  -1.1361439e-02  -1.2244595e-02  -1.1636474e-02  -1.1590556e-02  -1.2810621e-02  -1.4099962e-02  -1.2128506e-02  -1.2120390e-02  -1.1747588e-02  -1.1057989e-02  -1.1576618e-02  -1.3116755e-02  -1.2322217e-02  -1.0263026e-02  -6.9822019e-03  -3.4008805e-03   8.2299410e-04   2.9630363e-03   1.5345142e-03  -7.6603792e-04  -2.6931403e-03  -6.8106862e-03  -8.5064367e-03  -7.5355787e-03  -6.3286472e-03  -4.5891527e-03  -3.3399907e-03  -4.2058376e-03  -5.0656997e-03  -6.6771459e-03  -8.6254401e-03  -7.6906070e-03  -7.0991774e-03  -7.5297579e-03  -7.3036115e-03  -7.8561924e-03  -9.6603942e-03  -1.2700755e-02  -1.2704962e-02  -1.2915506e-02  -1.1239226e-02  -1.0574750e-02  -7.6073251e-03  -6.1398455e-03  -3.8637941e-03  -2.9435690e-03  -7.4269516e-04   1.8049246e-03   3.6124692e-03   6.6875257e-03   1.0213260e-02   1.3847008e-02   1.9835372e-02   2.5598320e-02   3.1147703e-02   3.4072725e-02   3.9077960e-02   4.0653275e-02   4.3141940e-02   4.5134453e-02   5.0225945e-02   5.3270311e-02   5.6633465e-02   5.8947631e-02   5.8910159e-02   5.6479058e-02   5.4334541e-02   5.1553145e-02   4.8589240e-02   4.3985837e-02   4.3437520e-02   3.9816648e-02   3.5785519e-02   3.3350782e-02   3.1947001e-02   2.8851822e-02   2.7319235e-02   2.6453580e-02   2.2320100e-02   1.9855946e-02   1.6307034e-02   1.2433816e-02   8.9573629e-03   7.6209704e-03   7.1796276e-03   8.1255253e-03   9.4454297e-03   1.1753128e-02   1.3977207e-02   1.7505471e-02   2.0316894e-02   2.3464369e-02   2.8214012e-02   3.2117843e-02   3.4914488e-02   3.7179649e-02   4.0171898e-02   4.1520932e-02   4.4312695e-02   4.7411899e-02   5.0300042e-02   5.1729270e-02   5.3212542e-02   5.4952413e-02   5.4984551e-02   5.4634505e-02   5.3636400e-02   5.1394913e-02   4.6944198e-02   4.1132640e-02   3.5763284e-02   3.1454067e-02   2.7237719e-02   2.3349468e-02   2.1840513e-02   1.9378393e-02   1.4752823e-02   1.0623201e-02   8.6982193e-03   4.3909796e-03   8.0151370e-05  -5.6567181e-04  -1.6058453e-03  -5.7712525e-03  -9.1595478e-03  -1.0682100e-02  -1.3462976e-02  -1.6914226e-02  -1.8706785e-02  -1.9521339e-02  -2.1175495e-02  -2.1965994e-02  -1.9431146e-02  -1.9386965e-02  -1.8371140e-02  -1.7238120e-02  -1.4989063e-02  -1.5599424e-02  -1.3260955e-02  -1.0633347e-02  -6.7568005e-03  -4.3512757e-03  -2.5309251e-03  -1.3404632e-03  -5.1110839e-04  -9.2234629e-04  -1.8122274e-03  -6.7676482e-04   3.8261778e-04  -3.3257574e-04  -3.2689461e-06  -7.9514290e-04  -3.3251259e-03  -5.3648328e-03  -5.5444173e-03  -5.7077396e-03  -4.2314031e-03  -3.4044397e-03  -4.2077468e-03  -3.8948157e-03  -4.6694567e-03  -4.1874266e-03  -2.3015645e-03   6.4352119e-04   3.1610738e-03   6.5874588e-03   7.4920535e-03   7.5035422e-03   7.6026516e-03   6.2384186e-03   4.8401219e-03   5.0369595e-03   7.0406082e-03   8.0833839e-03   8.9782831e-03   1.0524008e-02   1.0574891e-02   9.0820139e-03   6.7791543e-03   7.4012585e-03   8.6288277e-03   8.6760997e-03   9.7163856e-03   1.1107382e-02   9.2185115e-03   7.1873061e-03   7.6078293e-03   7.8072927e-03   8.7475334e-03   8.2275853e-03   6.7125525e-03   6.1412548e-03   4.2957818e-03   2.8664752e-03   3.2498432e-03   1.5148152e-03  -8.0100586e-04  -2.1656881e-03  -2.4389621e-03  -3.9369197e-03  -1.2964324e-03  -9.0779375e-05  -9.0283618e-04  -2.3383415e-03  -3.4589867e-03  -5.5843459e-03  -7.0579215e-03  -6.4987839e-03  -4.5199847e-03  -1.2670061e-03  -4.7299983e-04   7.8282578e-04   2.8970457e-03   4.1616459e-03   4.2164163e-03   4.4474183e-03   5.5978795e-03   6.3267684e-03   5.4484678e-03   4.7672813e-03   6.9476324e-03   7.7699045e-03   7.6500939e-03   1.0293532e-02   1.1146351e-02   9.8297325e-03   8.8405571e-03   9.6451982e-03   6.3203981e-03   5.6286112e-03   5.4595791e-03   6.4183259e-03   4.7893967e-03   5.2885251e-03   7.9591237e-03   9.7884442e-03   9.9475555e-03   1.1286808e-02   1.2733740e-02   1.2391627e-02   1.2843320e-02   1.3268127e-02   1.3769140e-02   1.5369666e-02   1.6513916e-02   1.6581520e-02   1.7319433e-02   1.7732983e-02   1.6488003e-02   1.5632697e-02   1.5252934e-02   1.6009532e-02   1.5386682e-02   1.6131480e-02   1.4786092e-02   1.2930515e-02   1.0156618e-02   1.0380754e-02   9.4139398e-03   7.9443331e-03   7.0610548e-03   5.7527990e-03   4.5441779e-03   4.4019045e-03   7.2557982e-03   8.3069529e-03   9.3469454e-03   1.0125557e-02   9.8390593e-03   8.3015983e-03   9.3771298e-03   1.1515822e-02   1.2778388e-02   1.4135098e-02   1.5733950e-02   1.6488726e-02   1.6426712e-02   1.5807680e-02   1.5047505e-02   1.6534049e-02   1.6704757e-02   1.7516737e-02   1.9598019e-02   2.0805871e-02   1.9292028e-02   1.8570309e-02   1.7627961e-02   1.5417501e-02   1.3750545e-02   1.1546094e-02   1.0141455e-02   7.7030470e-03   6.6080058e-03   4.8679741e-03   3.9349936e-03   3.0696227e-03   1.5820780e-03  -6.3165672e-05  -3.1875821e-04  -7.3786206e-04  -2.1310730e-03  -1.9509429e-03  -2.9384971e-03  -4.9867676e-03  -6.2793205e-03  -6.4404520e-03  -7.1504088e-03  -7.3840621e-03  -6.8831602e-03  -6.9695383e-03  -7.3415924e-03  -8.7757268e-03  -1.0800352e-02  -1.2012597e-02  -1.2915821e-02  -1.3937035e-02  -1.4381229e-02  -1.4034981e-02  -1.4487808e-02  -1.5558130e-02  -1.6870480e-02  -1.7727598e-02  -1.7724768e-02  -1.6876675e-02  -1.5766422e-02  -1.4269974e-02  -1.4734803e-02  -1.5043333e-02  -1.6211253e-02  -1.6776055e-02  -1.7158177e-02  -1.5593965e-02  -1.4943961e-02  -1.3588617e-02  -1.2685537e-02  -1.3096159e-02  -1.3776002e-02  -1.4571970e-02  -1.5310051e-02  -1.6739886e-02  -1.6506767e-02  -1.5025831e-02  -1.2957400e-02  -8.8743581e-03  -1.0635804e-03   9.3595962e-03   2.3471222e-02   4.3003866e-02   7.0042597e-02   1.0498072e-01   1.4770429e-01   1.9598885e-01   2.4287008e-01   2.8077032e-01   3.0311742e-01   3.0426591e-01   2.8452550e-01   2.4902753e-01   2.0364007e-01   1.5637396e-01   1.1503845e-01   8.2790631e-02   5.9348189e-02   4.4049898e-02   3.3951473e-02   2.6890994e-02   2.1399593e-02   1.7126942e-02   1.2586593e-02   7.6662640e-03   4.4406898e-03   5.9957043e-04  -3.6426637e-03  -7.4003279e-03  -1.0444778e-02  -1.4623210e-02  -1.7481412e-02  -2.0080342e-02  -2.3039891e-02  -2.4296063e-02  -2.5311037e-02  -2.6406086e-02  -2.7278391e-02  -2.7460375e-02  -2.7260843e-02  -2.7489693e-02  -2.7833074e-02  -2.6527598e-02  -2.4716164e-02  -2.3901936e-02  -2.0931100e-02  -1.7308242e-02  -1.3642333e-02  -8.9688049e-03  -2.9636483e-03   4.2272518e-03   1.2396989e-02   2.0450032e-02   2.8938710e-02   3.6310902e-02   3.9400718e-02   4.1014801e-02   4.0383913e-02   3.7929599e-02   3.4775770e-02   3.1499337e-02   2.5244218e-02   1.9865930e-02   1.4257500e-02   8.9233492e-03   4.8237290e-03   2.3826451e-03   4.5641260e-04  -1.6761747e-03  -2.3323622e-03  -3.0475063e-03  -3.5072750e-03  -3.9660009e-03  -4.5521928e-03  -5.8905816e-03  -5.7275720e-03  -5.6509131e-03  -4.4433319e-03  -2.0474764e-03  -1.4220353e-03  -9.7658165e-04  -1.2914923e-05   1.2135523e-04  -2.8538738e-04  -6.7333989e-05  -1.7642829e-03  -2.0339458e-03  -9.0819883e-04   8.5704194e-04   1.6668425e-03   2.2399682e-03   4.1715393e-03   3.8424500e-03   1.9073088e-03   2.0120506e-03   4.5162467e-03   4.5884983e-03   4.5797447e-03   5.8703403e-03   7.7661690e-03   8.4964611e-03   8.7360348e-03   1.0549261e-02   1.1060722e-02   9.9050016e-03   1.0346866e-02   1.0781540e-02   1.0444305e-02   1.1449369e-02   1.1867125e-02   1.0243731e-02   9.8640144e-03   9.1748808e-03   7.5687361e-03   5.8013661e-03   3.3870486e-03   1.1435636e-03   1.5336543e-04  -7.6386205e-04  -1.4284136e-03   2.1773726e-04   1.1226316e-03  -1.7362973e-04  -1.0851987e-03   2.2725108e-03   3.4514437e-03   4.0210099e-03   6.4759483e-03   9.0095332e-03   8.0262927e-03   9.8268153e-03   1.1188089e-02   8.9540650e-03   9.5590873e-03   9.5006903e-03   8.3843116e-03   7.4590843e-03   8.4262218e-03   8.4672486e-03   1.0857010e-02   1.0781593e-02   1.3094082e-02   1.5542159e-02   1.6067307e-02   1.4507871e-02   1.3959458e-02   1.1569433e-02   8.0484527e-03   3.4743648e-03   1.3415438e-03  -2.2563532e-04  -1.9004077e-03   2.8962790e-04   1.8653720e-03   1.7460519e-03   2.6583321e-03   2.2154690e-03  -1.3537338e-03  -2.9719287e-03  -3.9606698e-03  -6.4874192e-03  -6.8200767e-03  -5.6524523e-03  -5.2509740e-03  -3.7255295e-03  -1.2144414e-03  -5.4137111e-04   5.8759256e-05   1.2068149e-03   1.3496801e-03   1.5177391e-03   2.5867024e-03   2.6265906e-03   3.3920193e-03   4.5501137e-03   6.7514653e-03   8.6118769e-03   9.9596703e-03   1.0737736e-02   9.6952198e-03   7.1162886e-03   4.7423241e-03   4.0458409e-03   2.4683240e-03   1.2738609e-03   9.2037734e-04   7.1425517e-04  -3.5568027e-04  -7.2995590e-04  -7.2423660e-04  -3.2677285e-03  -6.4401273e-03  -7.4806582e-03  -7.8713824e-03  -7.0662842e-03  -3.6323551e-03  -2.8453161e-04   2.1335688e-03   4.6462906e-03   5.8838121e-03   7.2222712e-03   1.0045295e-02   1.2717241e-02   1.5546886e-02   1.9612972e-02   2.4256014e-02   2.7988818e-02   3.2207522e-02   3.7886828e-02   4.3673591e-02   4.7923761e-02   5.1457128e-02   5.4544438e-02   5.4517295e-02   5.2228196e-02   5.1706262e-02   5.3234294e-02   5.3302328e-02   5.2538107e-02   5.2334639e-02   5.0080270e-02   4.4289816e-02   3.8077462e-02   3.1353025e-02   2.2943871e-02   1.4182333e-02   7.6281773e-03   1.8523313e-03  -1.5778183e-03  -3.2989298e-03  -6.1372371e-03  -1.0177455e-02  -1.4221874e-02  -1.8261576e-02  -2.2517604e-02  -2.4443193e-02  -2.4887888e-02  -2.5382694e-02  -2.5129213e-02  -2.3703710e-02  -2.3094329e-02  -2.1536872e-02  -1.8861073e-02  -1.7531655e-02  -1.5517539e-02  -1.3072289e-02  -1.1281741e-02  -9.0200340e-03  -6.7360640e-03  -6.2681684e-03  -5.9865278e-03  -5.4847368e-03  -4.7569313e-03  -2.0956672e-03   1.6923767e-03   6.9060967e-03   1.3678226e-02   1.9995219e-02   2.4584770e-02   3.0208590e-02   3.6687182e-02   4.0822722e-02   4.4714980e-02   4.9332246e-02   5.1085176e-02   5.0533935e-02   5.0359605e-02   4.8814722e-02   4.6188201e-02   4.3126950e-02   3.9414980e-02   3.6120077e-02   3.3093319e-02   2.7708052e-02   2.3100426e-02   1.9321967e-02   1.3362331e-02   7.8424080e-03   6.4713440e-03   6.7380773e-03   7.0164412e-03   7.4082417e-03   7.7159792e-03   6.0805504e-03   4.5052550e-03   4.2295280e-03   5.9453700e-03   8.8188948e-03   1.1975908e-02   1.5619329e-02   1.7661024e-02   1.7745037e-02   1.8309565e-02   1.9961446e-02   2.0358308e-02   1.9923335e-02   2.2058258e-02   2.0162064e-02   1.7363390e-02   1.3824282e-02   1.2540435e-02   9.3239886e-03   7.3229709e-03   7.4901968e-03   4.5912629e-03   1.9910236e-03   1.2261244e-03   8.7784097e-05  -1.9394456e-03  -3.4131892e-04  -1.4103504e-03  -2.8546507e-03  -3.4906203e-03  -5.3098335e-03  -7.2420254e-03  -7.6382022e-03  -1.0861820e-02  -1.1772657e-02  -1.2502474e-02  -1.3184970e-02  -1.3393713e-02  -1.2622536e-02  -1.3990002e-02  -1.3602100e-02  -1.1204520e-02  -1.1990426e-02  -1.0992899e-02  -9.7324612e-03  -8.6488927e-03  -6.9989355e-03  -4.7204597e-03  -2.1749092e-03   9.0288514e-04   2.9721501e-03   3.6952122e-03   7.6245273e-03   1.0130293e-02   1.4239763e-02   1.8429780e-02   2.1909429e-02   2.4985455e-02   2.8697316e-02   3.3573848e-02   3.8994182e-02   4.1991988e-02   4.5267224e-02   4.7206855e-02   4.5738381e-02   4.3173856e-02   4.2782071e-02   4.0917118e-02   3.8827423e-02   3.6279145e-02   3.3442415e-02   2.8604100e-02   2.3270025e-02   1.8982151e-02   1.4929765e-02   9.2595518e-03   4.8355687e-03   7.2140337e-04  -2.7915010e-03  -5.6262017e-03  -6.5173561e-03  -7.1487681e-03  -9.0244749e-03  -1.0645486e-02  -1.2236654e-02  -1.3530507e-02  -1.3798177e-02  -1.2415738e-02  -1.2187572e-02  -1.1513460e-02  -9.1088284e-03  -7.1576595e-03  -5.9886863e-03  -5.0389276e-03  -2.9223964e-03  -2.3361491e-03  -2.7745811e-03  -4.1285148e-03  -5.2490975e-03  -4.5437813e-03  -3.6267662e-03  -2.7742305e-03  -2.5145957e-04   2.1561154e-03   3.2127093e-03   2.7058158e-03   4.3651397e-03   3.3598444e-03   5.7481192e-03   5.2615023e-03   5.7066478e-03   4.7051471e-03   6.9370866e-03   5.9951582e-03   9.0937949e-03   1.1740670e-02   1.4566603e-02   1.6420600e-02   2.0256708e-02   2.0491605e-02   1.9415121e-02   1.8340584e-02   1.8943754e-02   1.7872781e-02   1.6382502e-02   1.7510402e-02   1.8434103e-02   1.8682499e-02   1.9141695e-02   1.9801487e-02   1.8779196e-02   1.6699599e-02   1.4230171e-02   1.2992631e-02   1.1461344e-02   1.0241539e-02   1.0028482e-02   1.0883934e-02   1.0240805e-02   1.0300017e-02   1.0822623e-02   1.1275610e-02   1.1338381e-02   1.1272349e-02   1.1577265e-02   1.0385684e-02   8.1805931e-03   8.0417064e-03   1.0006921e-02   8.8039071e-03   8.6144619e-03   9.0997598e-03   1.0361566e-02   8.3695067e-03   8.9726154e-03   1.0307776e-02   1.0582031e-02   9.0055761e-03   8.6083941e-03   8.8208476e-03   8.3708073e-03   1.0401785e-02   1.0598182e-02   1.0928616e-02   1.2064513e-02   1.2607014e-02   1.2441043e-02   1.1414233e-02   1.0696845e-02   9.5398024e-03   1.0951545e-02   1.2485351e-02   1.4141630e-02   1.4361478e-02   1.3738326e-02   1.2684717e-02   1.1128446e-02   1.0830401e-02   1.1555636e-02   1.2395311e-02   1.0139744e-02   6.8788725e-03   3.2298482e-03   2.8326804e-03   1.0842770e-03  -1.1389483e-03  -1.2045996e-04  -1.1768144e-03  -2.4404629e-03  -3.1312513e-03  -1.1538299e-03  -2.9941330e-03  -1.5039433e-03  -4.0127304e-03  -5.4842963e-03  -8.4034098e-03  -8.9273786e-03  -1.1438535e-02  -1.4237027e-02  -1.5479434e-02  -1.5049667e-02  -1.5424507e-02  -1.4968295e-02  -1.3883675e-02  -1.4620938e-02  -1.4331592e-02  -1.2967292e-02  -1.1424429e-02  -8.1800516e-03  -4.6146189e-03  -2.9581548e-03  -1.8819961e-03  -8.9867951e-04   9.7084223e-04   1.5744315e-03   1.0099331e-03   3.8692399e-03   7.8127568e-03   6.8547284e-03   5.3810994e-03   8.0231936e-03   6.4464431e-03   1.6042688e-03   9.5357660e-04   2.0831297e-03   3.6770833e-04  -9.3953198e-05   3.8573043e-03   5.4835491e-03   7.3574154e-03   7.3550656e-03   6.7104034e-03   3.6875886e-03   2.4019950e-03   1.4812775e-03   3.2861683e-03   6.6151072e-03   9.4674972e-03   1.1414299e-02   1.2072996e-02   1.3572745e-02   1.5170453e-02   1.4337746e-02   1.3839359e-02   1.4824643e-02   1.5852418e-02   1.5398055e-02   1.6199468e-02   1.7535904e-02   1.7653494e-02   1.6764960e-02   1.4511259e-02   1.3961568e-02   1.4136128e-02   1.3861240e-02   1.1975505e-02   1.3204081e-02   1.4430341e-02   1.2469809e-02   1.0634542e-02   1.0276933e-02   7.0292797e-03   5.0714826e-03   5.2737502e-03   6.2192258e-03   7.7794815e-03   1.0771917e-02   1.0401845e-02   1.1525637e-02   1.4354675e-02   1.5664173e-02   1.6024320e-02   1.8691312e-02   1.8422140e-02   1.7859848e-02   1.8957711e-02   1.9523922e-02   1.9638659e-02   2.2525134e-02   2.4900266e-02   2.5841982e-02   2.7396327e-02   2.9982255e-02   3.0465580e-02   3.0321317e-02   3.0524525e-02   3.0177973e-02   2.8271890e-02   2.7580223e-02   2.7884223e-02   2.6920729e-02   2.8192875e-02   2.8298353e-02   2.6049778e-02   2.1394301e-02   1.7505736e-02   1.4248300e-02   1.1296033e-02   1.2021542e-02   1.2122314e-02   1.3338255e-02   1.1864171e-02   1.3227014e-02   1.1831522e-02   1.1726946e-02   1.1289566e-02   1.0369957e-02   9.0070012e-03   1.0060124e-02   1.0127815e-02   8.7316577e-03   8.5519338e-03   7.2942505e-03   3.9591764e-03   1.1139478e-03  -8.9358125e-04  -2.0323293e-03  -4.5972683e-03  -5.4298125e-03  -6.7097336e-03  -9.4861162e-03  -8.0611201e-03  -7.5849104e-03  -9.4542839e-03  -8.0480020e-03  -4.0901339e-03  -4.6399735e-03  -3.1120988e-03   5.1530790e-06   1.2471477e-03   1.5345590e-03   4.9429289e-04   8.0799373e-04   1.2475048e-05  -2.0657573e-03  -4.0797918e-03  -3.4905347e-03  -4.8833815e-03  -5.5856530e-03  -5.9296927e-03  -5.4990477e-03  -7.5968564e-03  -8.3784184e-03  -9.7030564e-03  -1.0173107e-02  -1.1358481e-02  -1.1479284e-02  -1.1936234e-02  -1.0399724e-02  -8.6217647e-03  -7.8014932e-03  -7.6789413e-03  -7.7884017e-03  -8.0598428e-03  -8.1954914e-03  -6.8536492e-03  -6.1786278e-03  -3.0680508e-03  -1.7145137e-03  -1.0196100e-03  -2.5609699e-04   1.6216619e-03   1.0208282e-03   7.6528379e-04   1.3071773e-03   1.6521291e-03   1.9568557e-03   2.1974781e-03   2.4916795e-03   2.4874890e-03   2.5268303e-03   3.0480393e-03   4.4255594e-03   6.0977478e-03   7.8903242e-03   9.3226631e-03   9.6317446e-03   8.9464514e-03   9.0914665e-03   8.7059393e-03   7.5841152e-03   7.7506395e-03   8.8630115e-03   8.9874980e-03   9.3992325e-03   1.0974874e-02   1.1999670e-02   1.1316324e-02   1.1150551e-02   1.0576173e-02   9.7011733e-03   8.4169077e-03   8.5310706e-03   8.1418373e-03   8.4058030e-03   8.1134893e-03   8.0291789e-03   7.9127786e-03   7.1336007e-03   5.5208459e-03   4.2420986e-03   2.9243432e-03   1.6307002e-03   1.0783758e-03   4.5894494e-04  -1.6515237e-04  -5.1435392e-05  -7.0660384e-04  -9.9739532e-04  -1.7045425e-03  -3.1395793e-03  -4.1750546e-03  -5.0266021e-03  -6.5256258e-03  -6.9181468e-03  -7.5582508e-03  -8.6929579e-03  -1.0134561e-02  -1.1709939e-02  -1.3450560e-02  -1.3575402e-02  -1.4200653e-02  -1.4341316e-02  -1.4288313e-02  -1.5058362e-02  -1.5687012e-02  -1.6864683e-02  -1.7809641e-02  -2.0249704e-02  -2.0518351e-02  -2.1100087e-02  -2.1390421e-02  -2.1843109e-02  -2.0326884e-02  -1.9358268e-02  -1.9018686e-02  -1.7827597e-02  -1.4967544e-02  -1.1710159e-02  -8.0392650e-03  -3.2970071e-03   3.3534833e-03   8.5150651e-03   1.4321930e-02   1.9925531e-02   2.5758191e-02   3.0656066e-02   3.7164178e-02   4.2933311e-02   4.8087540e-02   5.2316645e-02   5.4737037e-02   5.6013794e-02   5.6713083e-02   5.7183192e-02   5.8311832e-02   6.0052609e-02   6.2888733e-02   6.5899053e-02   6.9089951e-02   7.2533727e-02   7.6409433e-02   7.9546977e-02   8.2473596e-02   8.5911615e-02   8.8641149e-02   9.0637247e-02   9.1713944e-02   9.2429509e-02   9.1828001e-02   9.0073580e-02   8.7365007e-02   8.3501964e-02   7.8951935e-02   7.5733885e-02   7.2484880e-02   6.9558877e-02   6.6479340e-02   6.3436095e-02   5.9739697e-02   5.5957771e-02   5.3180621e-02   5.2347631e-02   5.3153141e-02   5.3291548e-02   5.4084536e-02   5.4349139e-02   5.3647856e-02   5.4507663e-02   5.4565281e-02   5.4949868e-02   5.4078778e-02   5.3062167e-02   4.9773915e-02   4.7180130e-02   4.3217287e-02   4.0054401e-02   3.6536781e-02   3.2133909e-02   2.7718732e-02   2.3711510e-02   1.9487483e-02   1.6119713e-02   1.3655029e-02   1.0359327e-02   7.3440394e-03   4.3658668e-03   1.2085734e-03  -2.0492375e-03  -4.8641005e-03  -7.1342376e-03  -8.5559330e-03  -1.0179359e-02  -1.2677620e-02  -1.4722344e-02  -1.6987010e-02  -1.8868199e-02  -2.0685104e-02  -2.1247498e-02  -2.1335445e-02  -2.1297434e-02  -2.0985255e-02  -2.0699314e-02  -2.0407082e-02  -2.0261462e-02  -1.9685407e-02  -1.9909765e-02  -1.9629472e-02  -1.9818813e-02  -1.9387730e-02  -1.9507168e-02  -1.8674972e-02  -1.7925021e-02  -1.7162632e-02  -1.7445458e-02  -1.6054570e-02  -1.6065825e-02  -1.5317099e-02  -1.4199792e-02  -1.2313636e-02  -1.1646922e-02  -9.9296468e-03  -9.0070331e-03  -7.6791601e-03  -6.4120013e-03  -5.1880286e-03  -4.4041814e-03  -3.5988718e-03  -3.2791700e-03  -2.8733563e-03  -2.6417337e-03  -2.3197450e-03  -2.6318059e-03  -2.4264452e-03  -1.9007057e-03  -7.5946973e-04   6.9405491e-06   1.4427705e-03   2.6530186e-03   3.5023942e-03   4.2387200e-03   4.8922411e-03   5.2890513e-03   6.1523706e-03   6.6996497e-03   6.9837366e-03   7.4834178e-03   8.3189017e-03   8.4005261e-03   8.7323997e-03   9.3233454e-03   1.0217836e-02   1.1335769e-02   1.1928989e-02   1.2668084e-02   1.3136838e-02   1.2987293e-02   1.2510050e-02   1.3228195e-02   1.3294055e-02   1.3243525e-02   1.4029825e-02   1.4934478e-02   1.5036189e-02   1.5564809e-02   1.6399075e-02   1.6379728e-02   1.6905086e-02   1.7030343e-02   1.6621973e-02   1.5879827e-02   1.5988117e-02   1.4794557e-02   1.4686122e-02   1.5120619e-02   1.5142571e-02   1.5270666e-02   1.5623543e-02   1.4745966e-02   1.4447939e-02   1.3890819e-02   1.2647248e-02   1.1853795e-02   1.1626863e-02   1.0307479e-02   9.3924332e-03   8.3692766e-03   6.9601348e-03   5.0606968e-03   3.5783450e-03   3.3238253e-03   3.1423811e-03   2.7276534e-03   2.1737549e-03   2.1900527e-03   1.8128054e-03   6.8782627e-04   4.2790030e-04   1.1127408e-03   9.4855151e-04   1.5813305e-04   5.1342185e-04   5.6750222e-04   1.0309241e-03   1.4365345e-03   2.5888586e-03   3.9888373e-03   4.6333719e-03   4.5966526e-03   4.4911671e-03   4.3006236e-03   3.8812517e-03   4.6605929e-03   5.5763772e-03   7.2463610e-03   8.2023521e-03   9.6629515e-03   1.0499914e-02   9.8405278e-03   9.8724477e-03   9.8791410e-03   8.9246579e-03   8.4497944e-03   9.6826245e-03   9.2345275e-03   9.2823925e-03   9.1123773e-03   8.1151672e-03   6.7457452e-03   6.0115370e-03   3.7702600e-03   2.4138508e-03   1.7600108e-03   9.3573206e-04   2.6206138e-06   2.9249828e-04   4.0632156e-04  -2.0381508e-04  -6.7174886e-04  -1.1185930e-03  -1.5788108e-03  -1.5456485e-03  -1.2304155e-03  -1.2281256e-03  -5.9570204e-04  -2.6422400e-04  -1.3100529e-03  -2.6363104e-03  -3.0404734e-03  -4.1863800e-03  -4.8425011e-03  -4.9135787e-03  -3.7289902e-03  -3.2396542e-03  -2.8115635e-03  -2.8427640e-03  -2.4604916e-03  -2.8926209e-03  -3.5221760e-03  -3.5392116e-03  -2.5372294e-03  -2.2830087e-03  -9.2553766e-04   2.2285530e-04   3.1207586e-03   4.0075956e-03   5.3058052e-03   4.8974253e-03   5.6337020e-03   4.5071017e-03   4.3533167e-03   5.1891666e-03   5.6688725e-03   5.8962683e-03   6.0956885e-03   6.1962908e-03   5.4529954e-03   5.4429433e-03   5.1603765e-03   4.4780339e-03   3.2989986e-03   1.6711871e-03  -2.7215795e-05  -1.6698675e-03  -2.7612130e-03  -4.2215193e-03  -4.7749425e-03  -3.6428905e-03  -3.2974472e-03  -3.1814402e-03  -1.7379380e-03  -1.6543197e-03  -1.9880064e-03  -9.0219602e-04   7.6480653e-04   1.7490064e-03   3.2117164e-03   4.3575963e-03   5.4691405e-03   6.3881585e-03   8.2202504e-03   1.1410666e-02   1.4412566e-02   1.6977010e-02   2.0310969e-02   2.2716347e-02   2.3914859e-02   2.5857578e-02   2.7122251e-02   2.6137620e-02   2.5085529e-02   2.4255017e-02   2.1284854e-02   1.8274413e-02   1.5961133e-02   1.4083326e-02   1.1665796e-02   1.0385229e-02   9.2032695e-03   8.9201003e-03   8.3637239e-03   7.9868342e-03   7.7837378e-03   9.6345215e-03   9.7484414e-03   9.4556835e-03   9.7832326e-03   9.5358777e-03   7.4412265e-03   6.7156301e-03   6.7923716e-03   6.0242726e-03   6.0526135e-03   4.1766109e-03   2.5843748e-03  -2.5844437e-04  -2.2727347e-03  -4.8031187e-03  -5.4279964e-03  -7.0051161e-03  -7.9405647e-03  -9.4797475e-03  -1.0892346e-02  -1.2439262e-02  -1.2956140e-02  -1.3407175e-02  -1.3404755e-02  -1.3873403e-02  -1.3617755e-02  -1.3696139e-02  -1.3858157e-02  -1.3394527e-02  -1.1775530e-02  -1.2038675e-02  -1.2321847e-02  -1.1415323e-02  -1.0947458e-02  -1.1000096e-02  -9.9884291e-03  -9.3736565e-03  -8.8089340e-03  -8.0992260e-03  -6.8271290e-03  -5.4164407e-03  -5.0575174e-03  -4.7665579e-03  -4.1438866e-03  -4.4414928e-03  -4.3348717e-03  -1.7505497e-03   1.2609601e-03   3.8827367e-03   6.2592371e-03   9.0678958e-03   1.0809499e-02   1.1534606e-02   1.2719870e-02   1.5333132e-02   1.7639198e-02   1.9341660e-02   2.2022747e-02   2.4756314e-02   2.6268220e-02   2.8470011e-02   3.1868582e-02   3.4580924e-02   3.6828282e-02   3.9582061e-02   4.1497937e-02   4.1350797e-02   4.2080649e-02   4.2776926e-02   4.2178776e-02   4.1935941e-02   4.3473386e-02   4.3756188e-02   4.3335831e-02   4.3222069e-02   4.2518906e-02   4.2155344e-02   4.0878364e-02   3.9416868e-02   3.9408622e-02   3.8467599e-02   3.6099011e-02   3.4324945e-02   3.2924113e-02   2.9976983e-02   2.9301660e-02   2.9014781e-02   2.9119669e-02   2.8987722e-02   2.9784538e-02   2.9291272e-02   2.7936936e-02   2.6692180e-02   2.5734813e-02   2.4568029e-02   2.3505229e-02   2.3288489e-02   2.2687289e-02   2.1878395e-02   2.0637103e-02   1.8903306e-02   1.6881149e-02   1.5217857e-02   1.3843729e-02   1.3174314e-02   1.1739923e-02   1.0251690e-02   8.8644311e-03   7.4764985e-03   5.7245813e-03   4.6157795e-03   5.3712800e-03   5.0141869e-03   4.3872754e-03   4.2376183e-03   4.0582800e-03   2.6937603e-03   2.2932252e-03   1.4782227e-03   3.0933631e-04  -6.8004967e-04  -2.7394287e-03  -3.7213621e-03  -4.0996763e-03  -4.0840549e-03  -3.5711925e-03  -2.1270174e-03  -2.4913020e-03  -2.2718933e-03  -3.2380490e-03  -3.0954595e-03  -3.4878493e-03  -3.5579603e-03  -4.1213892e-03  -4.2757708e-03  -5.6490016e-03  -6.5130559e-03  -6.8687833e-03  -7.1165667e-03  -7.2505815e-03  -7.2302970e-03  -7.2701465e-03  -7.1041606e-03  -7.1194833e-03  -6.8369914e-03  -6.3967242e-03  -6.4938028e-03  -6.3152654e-03  -6.4437056e-03  -6.9064185e-03  -7.3007357e-03  -7.1044257e-03  -7.2429122e-03  -7.7626213e-03  -7.6050309e-03  -7.4486619e-03  -6.9712117e-03  -6.5113956e-03  -5.5466544e-03  -5.1268820e-03  -4.5819593e-03  -4.6219117e-03  -4.4241566e-03  -4.1446530e-03  -3.9809173e-03  -3.8386843e-03  -3.4069090e-03  -3.1201727e-03  -2.4858038e-03  -1.4780786e-03  -1.5154255e-03  -8.3706103e-04  -3.2531281e-04   6.5687313e-05   5.3104641e-04   1.4859825e-03   9.9474515e-04   1.3655281e-03   1.9191573e-03   1.9282286e-03   2.1274528e-03   3.0291024e-03   2.8625207e-03   2.1891220e-03   2.2877090e-03   2.1404323e-03   2.5206848e-03   2.5700074e-03   3.0944110e-03   3.2314942e-03   3.0104506e-03   2.4327059e-03   2.6927756e-03   2.9428475e-03   3.3473417e-03   3.8054859e-03   4.3283397e-03   4.6442701e-03   4.8156035e-03   4.8796853e-03   4.8671579e-03   4.7529791e-03   4.6167545e-03   4.8474533e-03   5.0711723e-03   5.5579537e-03   5.6657042e-03   5.4206192e-03   4.6803506e-03   4.0365955e-03   3.6418716e-03   3.3229740e-03   3.4804830e-03   3.4683365e-03   3.2939994e-03   3.4634564e-03   3.9711915e-03   3.7545050e-03   4.1314844e-03   4.1019920e-03   3.5732801e-03   2.9615770e-03   2.9714922e-03   2.5730894e-03   2.4443763e-03   2.3918470e-03   2.4338722e-03   2.3032601e-03   2.1761814e-03   2.3463576e-03   2.3304210e-03   2.4385233e-03   2.6514858e-03   2.8675951e-03   2.5726214e-03   2.2451861e-03   1.9779002e-03   1.8622970e-03   9.8021956e-04   9.2479706e-04   1.0915913e-03   1.1412944e-03   7.3546231e-04   1.2540292e-03   1.0278765e-03   1.8088580e-03   1.6136813e-03   1.8816429e-03   1.7545656e-03   1.8744643e-03   9.8925786e-04   9.7646471e-04   7.8921481e-04   6.0854800e-04   7.8966764e-04   7.7761674e-04   8.4562379e-04   1.1142512e-03   1.2305335e-03   1.2536651e-03   1.2244750e-03   1.3966053e-03   1.0708979e-03   1.1157474e-03   7.3371887e-04   6.8148916e-04   8.8719821e-04   1.5829194e-03   2.2696522e-03   2.6978515e-03   3.4367009e-03   3.5910175e-03   3.1518996e-03   2.6230619e-03   2.4775237e-03   2.3984142e-03   2.2165723e-03   2.3406126e-03   2.5911721e-03   3.1107215e-03   2.7817310e-03   2.8497933e-03   2.7059606e-03   2.7706115e-03   2.2179835e-03   2.2192740e-03   1.8626528e-03   1.8076890e-03   1.7491590e-03   1.4453054e-03   1.6613063e-03   2.1258524e-03   2.5906234e-03   2.6894606e-03   2.6624526e-03   2.2036931e-03   1.7998468e-03   1.4028647e-03   8.8774170e-04   1.6080817e-03   1.7239543e-03   1.4433399e-03   9.0569826e-04   8.5633427e-04  -1.0329142e-04  -4.4231282e-04  -6.0815621e-04  -1.1677900e-04  -5.1185738e-04  -5.5895651e-04  -7.7301084e-04  -1.3963163e-03  -2.3171221e-03  -3.6664455e-03
  -8.4847683e-03  -3.6322203e-03  -3.8891723e-03  -3.1033993e-03  -2.7549529e-03  -2.8859528e-03  -3.1906757e-03  -3.9555083e-03  -3.8912208e-03  -1.5175100e-03  -7.3449379e-04   5.4504262e-04   2.5232788e-03   2.8000727e-03   8.7549798e-04   7.2000293e-04   1.6656734e-03   3.9717399e-03   5.2115202e-03   4.9233314e-03   5.2267203e-03   5.4970420e-03   4.6161344e-03   5.1036907e-03   6.9017034e-03   7.9645349e-03   8.0282400e-03   9.8485057e-03   1.2120299e-02   1.3054313e-02   1.2438879e-02   1.2496997e-02   1.2336605e-02   1.2093924e-02   1.2032422e-02   1.3024856e-02   1.4800631e-02   1.5979465e-02   1.6496235e-02   1.7857299e-02   2.0076801e-02   2.0594634e-02   1.8964619e-02   1.7417173e-02   1.4848230e-02   1.1647476e-02   8.2032903e-03   5.7175209e-03   4.2999916e-03   3.9971646e-03   2.8294024e-03   1.9114084e-03   2.7247697e-03   1.5062647e-03  -4.4168643e-04  -1.2971895e-03  -1.4849365e-03  -3.1034900e-03  -2.6051537e-03  -9.5933860e-04  -1.1807019e-03  -1.3398520e-03  -4.3932374e-04   4.8962027e-04   5.5188970e-05  -6.8304426e-04   1.4090337e-03  -3.4854253e-04  -2.1857206e-03  -2.7242313e-03  -3.5337929e-04  -6.1356551e-04   2.4608971e-03   6.0597769e-03   7.2625735e-03   6.3957672e-03   6.9563103e-03   8.0336329e-03   8.0923574e-03   1.1376869e-02   1.6235016e-02   1.8077903e-02   1.9949041e-02   2.0109582e-02   2.0427754e-02   1.9549259e-02   2.0782813e-02   2.1094399e-02   2.2357327e-02   2.1952758e-02   2.1225744e-02   2.0215737e-02   1.8474152e-02   1.6450561e-02   1.3829015e-02   1.1932118e-02   9.3895347e-03   6.9175045e-03   4.5634586e-03   4.4513024e-03   4.0022406e-03   5.6696317e-03   5.3943186e-03   4.7595804e-03   3.0308067e-03   1.4761962e-03  -2.4836974e-03  -1.2592929e-03   6.4738250e-05  -1.9414897e-04   5.3137102e-04   1.2669001e-03  -1.7701569e-03  -4.9969698e-03  -7.3208012e-03  -9.4616353e-03  -1.0435763e-02  -1.1015976e-02  -1.0065846e-02  -8.5599504e-03  -8.6241804e-03  -9.5006999e-03  -9.3040621e-03  -1.0124080e-02  -1.0250453e-02  -8.7404357e-03  -8.5272677e-03  -9.3092419e-03  -9.4078953e-03  -9.3807629e-03  -9.8107738e-03  -9.4291377e-03  -8.5110129e-03  -1.0435602e-02  -1.2411857e-02  -1.3897014e-02  -1.3264521e-02  -1.3412571e-02  -1.1360996e-02  -9.6600377e-03  -8.3666342e-03  -8.0418105e-03  -6.8885012e-03  -4.4269215e-03  -1.3886904e-03  -5.3379105e-05   2.4335853e-04   1.6572439e-03   2.9408953e-03   2.3317466e-03   2.5600688e-03   2.2351869e-03   1.7071010e-03   2.0367715e-03   2.7121495e-03   3.1657667e-03   3.7293505e-03   3.8362408e-03   5.3901503e-03   6.7838671e-03   8.8931482e-03   1.3850172e-02   1.8656133e-02   1.9604561e-02   2.1535270e-02   2.4809723e-02   2.6533675e-02   2.7974851e-02   3.2043256e-02   3.5450830e-02   3.7311237e-02   3.9892043e-02   4.2005440e-02   4.2150043e-02   4.3057635e-02   4.4514247e-02   4.5274989e-02   4.7835778e-02   5.0441561e-02   5.1328332e-02   5.0349516e-02   4.7735975e-02   4.3861355e-02   4.0629339e-02   3.7663486e-02   3.4198004e-02   3.2996150e-02   3.1386622e-02   2.8233050e-02   2.5736746e-02   2.4984058e-02   2.3511801e-02   2.2827669e-02   2.2558729e-02   2.1450227e-02   2.0659281e-02   1.7951776e-02   1.5617474e-02   1.4076272e-02   1.3114968e-02   1.2480567e-02   1.3899569e-02   1.4316473e-02   1.4264231e-02   1.2494332e-02   1.1162771e-02   9.3302261e-03   7.0560032e-03   4.8129753e-03   4.4598707e-03   2.4690857e-03  -1.1148110e-03  -4.9400915e-03  -5.2236073e-03  -7.8594470e-03  -7.5772648e-03  -5.8250399e-03  -3.5618266e-03  -5.0480862e-03  -4.6964387e-03  -6.7542408e-03  -7.8848748e-03  -8.0440479e-03  -8.5235835e-03  -8.0069276e-03  -6.2108996e-03  -5.7515666e-03  -6.7095184e-03  -6.7623823e-03  -5.3678352e-03  -3.3985281e-03  -2.5203687e-03  -2.2045956e-03  -2.6443881e-03  -2.1565616e-03  -2.4507801e-03  -1.6820836e-03   3.8031495e-04   3.7310830e-03   5.1435697e-03   5.7305615e-03   5.4280623e-03   6.8721796e-03   6.0040290e-03   2.7359353e-03  -3.3505439e-04  -1.7568031e-03  -4.9334103e-03  -6.2537629e-03  -5.1895177e-03  -3.6058635e-03  -2.3833478e-03  -1.4559803e-03   8.4176884e-04   4.2445263e-03   7.2388324e-03   9.7530975e-03   1.2539710e-02   1.4562381e-02   1.4770441e-02   1.2246396e-02   1.3217323e-02   1.3999712e-02   1.4384370e-02   1.4387757e-02   1.6960704e-02   1.5781787e-02   1.3846985e-02   1.2188409e-02   1.2327183e-02   1.1671221e-02   1.0416580e-02   1.1889508e-02   1.2345756e-02   1.1200980e-02   1.0478817e-02   1.0747837e-02   9.9093259e-03   1.0581582e-02   1.0539630e-02   1.0357474e-02   1.1296135e-02   1.1663305e-02   1.0190144e-02   9.4156904e-03   9.3660329e-03   8.2825787e-03   6.7733425e-03   6.9156381e-03   8.1539375e-03   7.2819203e-03   5.8704310e-03   4.0830853e-03   3.3260846e-03   1.6386667e-03   1.1975468e-03   9.0933918e-04   1.0982242e-03   2.6836476e-04   1.5609128e-04  -6.1874314e-04  -2.5940678e-03  -2.4599685e-03  -3.3774330e-03  -4.0068646e-03  -3.7588327e-03  -1.7105397e-03  -1.0322139e-03  -4.4889154e-04  -1.1355664e-03  -1.5206524e-03  -1.3429335e-03  -2.4599937e-03  -3.6830621e-03  -4.2880157e-03  -4.6621081e-03  -6.1283643e-03  -6.2705933e-03  -5.0169302e-03  -5.8755139e-03  -8.1338376e-03  -7.2595522e-03  -6.7277024e-03  -8.4815755e-03  -8.5708556e-03  -6.5993780e-03  -6.4388478e-03  -6.1227748e-03  -4.4074824e-03  -2.8110253e-03  -3.3363624e-03  -4.8730585e-03  -5.3174602e-03  -4.7245949e-03  -3.6509821e-03  -2.2366643e-04   1.6876893e-03   7.2292604e-04   1.8011009e-04   1.6252545e-03   1.1932042e-03  -1.6053838e-04   1.4437556e-03   1.0682828e-03  -1.2893544e-03  -3.3264739e-03  -2.6657339e-03  -3.4050775e-03  -3.6575466e-03  -3.9904597e-03  -4.2132595e-03  -4.4420783e-03  -4.6407380e-03  -2.6992831e-03  -1.7928356e-03  -3.7541110e-04   6.7803566e-04   3.1709680e-03   5.7822275e-03   1.1846999e-02   2.0471448e-02   3.1751228e-02   4.2876549e-02   5.4955530e-02   6.6065900e-02   7.3148205e-02   7.5846518e-02   7.4922174e-02   6.8554170e-02   5.6869328e-02   4.2589104e-02   2.9064465e-02   1.7462527e-02   7.9588905e-03  -2.6512607e-05  -2.4248391e-03  -4.6355425e-03  -5.9606873e-03  -8.6988721e-03  -9.6946610e-03  -1.1917436e-02  -1.2705876e-02  -1.4123782e-02  -1.4112565e-02  -1.4020348e-02  -1.4464624e-02  -1.3857382e-02  -1.2283721e-02  -1.1331582e-02  -9.4667161e-03  -5.6375060e-03  -1.9806489e-03   8.5258688e-04   5.4809021e-03   1.2201188e-02   1.8506781e-02   2.6667860e-02   3.7240439e-02   4.9230299e-02   5.8656772e-02   6.6939793e-02   7.2543965e-02   7.3505710e-02   6.8922797e-02   6.1977712e-02   5.1608062e-02   3.9467743e-02   2.9547711e-02   2.0337545e-02   1.5287919e-02   1.1592889e-02   1.0871967e-02   8.8898899e-03   8.5953377e-03   7.2535690e-03   7.8564598e-03   7.3436694e-03   8.3459054e-03   7.4811420e-03   5.9792175e-03   4.4847883e-03   3.0143952e-03   4.4925197e-04   6.1218866e-04   1.1551853e-03   1.5424673e-03   5.3190069e-05  -1.7135568e-03  -1.8716855e-03  -2.3640401e-03  -1.9432969e-03  -1.7362314e-03  -6.7885415e-04  -5.1449949e-04   6.1969426e-04   6.5229073e-04   1.8344058e-03   3.0885545e-03   3.8600396e-03   4.2410148e-03   5.0138209e-03   6.3850387e-03   3.9496765e-03   1.8007144e-03   1.5891975e-03   2.6513473e-04  -9.4658965e-04   1.5409841e-03   4.0353381e-03   4.3684104e-03   4.5473957e-03   3.6389048e-03   2.9956080e-03   2.1975625e-03   1.0814223e-05  -3.7170612e-04   3.9611730e-04   3.8179606e-03   5.3744024e-03   7.3287810e-03   8.5095311e-03   8.9939880e-03   6.6527447e-03   5.4819354e-03   3.6949092e-03   1.6955584e-03  -2.0984187e-04  -4.0625042e-04  -6.8596839e-04   9.0507987e-05  -1.3947541e-03  -1.2326154e-03  -1.9874147e-03  -3.1566688e-03  -5.6495673e-03  -6.6053559e-03  -7.3516055e-03  -8.8659282e-03  -9.8120521e-03  -9.0125817e-03  -7.1886438e-03  -6.5168420e-03  -5.2163244e-03  -4.0457988e-03  -3.8277645e-03  -3.0002883e-03  -1.2205377e-03   1.1628293e-03   4.7966136e-03   9.2131427e-03   1.2999532e-02   1.5769766e-02   1.9117165e-02   2.0896946e-02   2.1115829e-02   2.1595449e-02   2.1513749e-02   1.9461989e-02   1.6929235e-02   1.5113269e-02   1.3023227e-02   1.0820097e-02   8.5473331e-03   9.0501727e-03   9.1868820e-03   7.8674587e-03   7.7010111e-03   7.7191588e-03   6.9349784e-03   4.2515310e-03   2.7304867e-03   1.5509788e-03   1.2723225e-03   9.8437113e-04   2.9402241e-03   2.9790593e-03   3.3109284e-03   2.9042782e-03   2.1031808e-03   1.1035678e-03   3.2087320e-03   3.3794661e-03   4.2793679e-03   3.7722889e-03   3.9363601e-03   2.7488582e-03   1.3834683e-03   4.8628821e-04   1.0486912e-03   2.4568359e-05   1.0004691e-03   3.4981696e-03   2.6883391e-03   2.6915676e-04   7.1302976e-04  -2.4403703e-04  -2.7271697e-03  -2.9687407e-03  -2.6900560e-03  -4.1377036e-03  -5.7560508e-03  -7.1356415e-03  -8.7376253e-03  -8.9003814e-03  -9.6630688e-03  -8.7571764e-03  -8.9065350e-03  -8.1691971e-03  -8.3955721e-03  -7.1565032e-03  -7.2166572e-03  -6.3074565e-03  -5.9996144e-03  -5.1426757e-03  -5.1406704e-03  -5.7021318e-03  -5.7290761e-03  -4.1709009e-03  -2.6456867e-03  -1.5683884e-03  -1.3778353e-03   6.4987039e-04   2.2774819e-03   3.6186155e-03   6.3043047e-03   9.0183718e-03   1.0309481e-02   1.1174915e-02   1.1225745e-02   1.2136806e-02   1.2799984e-02   1.5007668e-02   1.5949215e-02   1.8038216e-02   1.6982877e-02   1.9230268e-02   1.8859071e-02   1.9686334e-02   1.9593037e-02   2.2702224e-02   2.4399879e-02   2.6157886e-02   2.7386008e-02   2.9359719e-02   3.1075170e-02   3.2067868e-02   3.3834044e-02   3.9027245e-02   4.2170907e-02   4.6914739e-02   5.1944063e-02   5.7333684e-02   6.0558718e-02   6.4568960e-02   6.3729479e-02   6.1219624e-02   5.7710662e-02   5.1351838e-02   4.3887201e-02   3.8477715e-02   3.3651481e-02   3.0445242e-02   2.6290173e-02   2.6109300e-02   2.3619352e-02   2.2573043e-02   1.9813043e-02   1.8849156e-02   1.6137337e-02   1.6444028e-02   1.5801747e-02   1.5469761e-02   1.5693773e-02   1.4787087e-02   1.2997924e-02   1.1141399e-02   1.0598039e-02   9.2279937e-03   9.0632118e-03   7.8032870e-03   6.4021984e-03   4.6837986e-03   4.8643542e-03   3.0954860e-03   2.4023455e-03   2.8456836e-03   1.8308134e-03  -1.3183538e-03  -2.7151868e-03  -2.9767947e-03  -4.2168622e-03  -4.5813595e-03  -4.5320642e-03  -4.0291708e-03  -5.8710387e-03  -7.3593549e-03  -9.5762595e-03  -1.0758880e-02  -1.2359410e-02  -1.3419169e-02  -1.3835391e-02  -1.2799627e-02  -1.3682728e-02  -1.5434761e-02  -1.4632027e-02  -1.4581388e-02  -1.6717435e-02  -1.6735149e-02  -1.4445512e-02  -1.3998957e-02  -1.4542788e-02  -1.3676080e-02  -1.1658632e-02  -1.1901556e-02  -1.1494187e-02  -1.0578003e-02  -9.6554090e-03  -9.9286102e-03  -9.0074332e-03  -7.2819805e-03  -4.6549269e-03  -2.2651220e-03  -1.2625843e-03  -6.5075395e-04   4.1890936e-04  -8.4762471e-04  -1.7861034e-03  -1.9307224e-03  -2.5093328e-03  -4.2850022e-03  -4.5008032e-03  -5.2667421e-03  -5.9194348e-03  -5.6784076e-03  -5.3659439e-03  -4.6346167e-03  -4.0191344e-03  -4.4922225e-03  -4.9935769e-03  -6.8906426e-03  -8.1207252e-03  -9.0981382e-03  -9.3904041e-03  -9.9901727e-03  -9.1189629e-03  -1.0406977e-02  -1.0824662e-02  -8.6719029e-03  -9.1584687e-03  -1.0639318e-02  -8.3996660e-03  -5.5515526e-03  -4.5935641e-03  -1.1777718e-03   2.1266258e-03   4.1178073e-03   7.0944605e-03   9.6478972e-03   1.4421562e-02   1.9224713e-02   2.4671733e-02   2.8029698e-02   3.2207624e-02   3.4650111e-02   3.9326802e-02   4.3092469e-02   4.5666420e-02   4.7923752e-02   4.9783320e-02   5.0781051e-02   5.2010610e-02   5.2614914e-02   5.1139713e-02   4.9330301e-02   4.6819736e-02   4.2705786e-02   4.0318997e-02   3.8199627e-02   3.6834046e-02   3.3251798e-02   3.0608008e-02   2.8191279e-02   2.6225132e-02   2.3151159e-02   2.1397601e-02   2.0390799e-02   1.8827575e-02   1.6916301e-02   1.6097339e-02   1.6514035e-02   1.5001759e-02   1.4049109e-02   1.4212125e-02   1.4118785e-02   1.4237664e-02   1.5938711e-02   2.2258356e-02   2.9026083e-02   3.3475674e-02   3.6541276e-02   3.8507319e-02   3.7020559e-02   3.6053587e-02   3.8457598e-02   4.2471060e-02   4.7902885e-02   5.1835407e-02   5.4488139e-02   5.6739192e-02   5.8241295e-02   5.6972496e-02   5.5585647e-02   5.3679780e-02   4.8083972e-02   4.3377466e-02   3.8599787e-02   3.3756479e-02   2.8885667e-02   2.7686778e-02   2.3232293e-02   2.1972272e-02   1.8219806e-02   1.3851148e-02   8.1224859e-03   4.6009735e-03   3.7263059e-04  -2.2310344e-03  -3.5955932e-03  -4.9886479e-03  -7.8915715e-03  -1.0814548e-02  -1.3447935e-02  -1.7070535e-02  -2.0333012e-02  -1.9229436e-02  -1.8742905e-02  -1.8704139e-02  -1.6831166e-02  -1.5148885e-02  -1.5814866e-02  -1.7366538e-02  -1.6448965e-02  -1.5670847e-02  -1.5432043e-02  -1.5514143e-02  -1.3085599e-02  -1.0609752e-02  -8.5945116e-03  -5.4118603e-03  -1.9641059e-03  -5.1888696e-04  -3.3099996e-04  -3.4172483e-04  -7.7676338e-04  -2.0298236e-03  -2.3013519e-03  -2.9655534e-03  -3.0829313e-03  -3.3696655e-03  -1.4592193e-03  -1.2768427e-03  -1.9243034e-03  -1.1075000e-03  -1.8350218e-03  -2.7865338e-03  -2.4818241e-03  -6.5403694e-04  -4.8492232e-06   2.7847116e-03   3.2963416e-03   2.6007815e-03   2.7767016e-03   3.3507005e-03   2.7852534e-03   2.3803257e-03   1.0103817e-03   3.8870964e-04   8.1625390e-04   2.0131499e-03   4.0325475e-03   7.0597965e-03   8.4410943e-03   9.5706930e-03   1.0693918e-02   1.2095193e-02   1.4482030e-02   1.7421718e-02   1.8512635e-02   1.8320677e-02   1.8015883e-02   1.7991293e-02   1.7142707e-02   1.5356348e-02   1.3964621e-02   1.3210471e-02   1.3089486e-02   1.1527717e-02   1.0087496e-02   1.0696562e-02   9.9954078e-03   6.6660606e-03   3.7680052e-03   2.8240404e-03  -6.9506188e-04  -2.7295673e-03  -4.5268680e-03  -4.8202741e-03  -6.8726854e-03  -6.1367683e-03  -6.7493042e-03  -6.1321728e-03  -4.7770452e-03  -3.6100617e-03  -2.6860477e-03   2.5700778e-04   2.0629938e-03   2.9563504e-03   5.6524660e-03   7.3679672e-03   6.9937568e-03   7.0824193e-03   6.8623003e-03   5.4427389e-03   2.5399271e-03   6.7406718e-04   6.6338975e-04   3.1031612e-03   4.2980859e-03   6.3850831e-03   9.1381209e-03   9.7711417e-03   8.9584713e-03   9.0568357e-03   8.2703788e-03   7.3141505e-03   7.3159695e-03   6.7950553e-03   6.5475007e-03   8.9422645e-03   9.1961166e-03   1.0139093e-02   1.1124921e-02   1.2964721e-02   1.1979306e-02   1.1595391e-02   1.1636006e-02   1.0962987e-02   9.3790108e-03   9.1417062e-03   9.0853495e-03   8.6535878e-03   9.1427790e-03   1.0361421e-02   1.1605144e-02   1.2800857e-02   1.3378425e-02   1.1822255e-02   9.3884174e-03   8.2185669e-03   8.5092674e-03   7.3128027e-03   5.4973814e-03   7.1990845e-03   6.3356304e-03   4.4136260e-03   4.3758072e-03   6.4718856e-03   4.6212494e-03   4.3334622e-03   4.6498144e-03   4.2331362e-03   4.7039839e-03   5.8829547e-03   6.6675836e-03   7.9831347e-03   9.6915517e-03   9.8783716e-03   1.1194532e-02   1.3786320e-02   1.6054891e-02   1.8577182e-02   2.0645140e-02   2.1654595e-02   2.1447886e-02   2.0604626e-02   2.1023320e-02   2.2539107e-02   2.3713717e-02   2.5729849e-02   2.7108218e-02   2.5703487e-02   2.3392065e-02   2.1931115e-02   1.8661451e-02   1.5262523e-02   1.3227677e-02   1.0478209e-02   9.0259265e-03   7.8568135e-03   5.1539902e-03   3.0804236e-03   1.3928812e-03  -1.4913782e-04  -2.1227376e-03  -1.6866746e-03  -2.2266638e-03  -1.3614137e-03  -3.9303126e-03  -4.6379901e-03  -5.3044595e-03  -5.5097470e-03  -6.2561958e-03  -5.5880039e-03  -5.4442865e-03  -5.8829447e-03  -6.5819112e-03  -7.5277969e-03  -8.5438752e-03  -9.1009663e-03  -1.0094704e-02  -1.2197785e-02  -1.3830007e-02  -1.3859587e-02  -1.5887747e-02  -1.8382299e-02  -1.8376923e-02  -1.7240967e-02  -1.7407837e-02  -1.7431377e-02  -1.5419414e-02  -1.4007184e-02  -1.5513581e-02  -1.5024839e-02  -1.3617807e-02  -1.4855459e-02  -1.5240106e-02  -1.3681020e-02  -1.3491395e-02  -1.2831239e-02  -1.1033596e-02  -1.0336775e-02  -1.0098615e-02  -1.0856192e-02  -1.1575314e-02  -1.1894139e-02  -1.3428617e-02  -1.4011992e-02  -1.3205834e-02  -1.2323524e-02  -9.6748357e-03  -3.2359788e-03   5.1938890e-03   1.6829081e-02   3.4631283e-02   5.9110426e-02   9.1078021e-02   1.3162487e-01   1.7708321e-01   2.2126833e-01   2.5616233e-01   2.7450066e-01   2.7328715e-01   2.5376800e-01   2.1997859e-01   1.7860960e-01   1.3812433e-01   1.0238872e-01   7.3780335e-02   5.2900887e-02   3.8730886e-02   2.9613411e-02   2.4189877e-02   1.9974297e-02   1.6375209e-02   1.2623702e-02   9.2485926e-03   4.7316823e-03   1.7299603e-03  -1.8880148e-03  -4.8420168e-03  -7.1335400e-03  -9.7452898e-03  -1.3625523e-02  -1.5002399e-02  -1.6560859e-02  -1.9626881e-02  -2.0981774e-02  -2.1586622e-02  -2.3429018e-02  -2.3790932e-02  -2.2324709e-02  -2.1834391e-02  -2.1584465e-02  -2.1123025e-02  -2.0483441e-02  -2.0665304e-02  -1.9922231e-02  -1.7931128e-02  -1.4689822e-02  -1.0400317e-02  -4.9885883e-03   1.6602766e-03   8.9528625e-03   1.6602459e-02   2.4223129e-02   3.0985039e-02   3.6575150e-02   3.9599786e-02   4.0031859e-02   3.8071424e-02   3.3396203e-02   2.7515625e-02   2.0529200e-02   1.5864119e-02   1.0217866e-02   5.8245562e-03   3.2881499e-03   1.4357951e-03  -1.9040944e-03  -3.9278175e-03  -4.5110130e-03  -5.3272331e-03  -4.2909297e-03  -5.1422680e-03  -5.4838443e-03  -6.5215571e-03  -7.0304340e-03  -7.2373692e-03  -5.7008523e-03  -3.4288933e-03  -2.5162312e-04   5.6085582e-04  -9.7872939e-04  -2.1483997e-03  -2.7168131e-03  -1.8256415e-03   7.0575843e-04   3.8168962e-03   6.5721402e-03   8.6389587e-03   8.8857345e-03   8.7723154e-03   9.3619173e-03   9.5057097e-03   8.2653434e-03   6.3547565e-03   5.3107649e-03   4.6150753e-03   3.9808272e-03   5.3910027e-03   7.6152580e-03   7.4540746e-03   7.0664259e-03   8.3284746e-03   9.1543036e-03   8.6218694e-03   7.9339451e-03   7.7320084e-03   7.4705895e-03   6.5974141e-03   6.6373653e-03   7.8106846e-03   7.7389640e-03   6.0593928e-03   5.1769831e-03   3.0874100e-03   7.5880728e-04  -1.6058261e-05  -6.4454494e-04  -2.3390161e-03  -2.4611612e-03  -2.5775458e-03  -3.1504398e-03  -3.1695595e-03  -3.0662258e-03  -1.1265918e-03   1.7413588e-03   4.0460489e-03   6.4993109e-03   1.0939105e-02   1.0034084e-02   1.0549054e-02   1.0765796e-02   1.2937645e-02   1.1464774e-02   1.0403134e-02   8.9900791e-03   1.0880036e-02   1.0137682e-02   1.0803204e-02   1.4168021e-02   1.5713880e-02   1.6744104e-02   1.6859661e-02   1.8098248e-02   1.5421847e-02   1.1908988e-02   7.7843650e-03   4.5458252e-03   3.7162247e-04   7.3227294e-04   3.1423907e-03   1.9605797e-03   9.8580444e-04   8.7034967e-04  -7.6377263e-04  -1.8952720e-03  -1.9088190e-03  -2.4351333e-03  -4.5414346e-03  -4.5687378e-03  -5.7678607e-03  -6.1024515e-03  -3.5777995e-03   2.7175201e-04   8.3510757e-04   8.6039710e-04   2.0544812e-03   2.1355162e-03   1.3441706e-03   2.1861338e-03   2.7830316e-03   3.8409713e-03   3.6154992e-03   4.1238801e-03   4.7825905e-03   5.6849874e-03   5.7322305e-03   7.0687813e-03   7.5399065e-03   7.4550391e-03   6.8807797e-03   5.9663347e-03   3.5452367e-03   1.1256639e-03  -1.0125489e-03  -1.5622400e-03  -1.0349027e-03   4.4455763e-04   1.9762550e-03   3.3366951e-03   3.4679199e-03   1.5575654e-03  -4.6822363e-04  -1.4091467e-03  -2.1995683e-03  -3.8754477e-03  -4.6132159e-03  -3.8508936e-03  -2.0487561e-03   1.2329283e-03   4.5430970e-03   7.8566366e-03   1.1560005e-02   1.4448980e-02   1.7809448e-02   2.2661540e-02   2.8172420e-02   3.2645107e-02   3.6716864e-02   4.1194713e-02   4.5624325e-02   4.8676487e-02   5.0446553e-02   5.1463144e-02   5.0696384e-02   5.0446990e-02   4.9193461e-02   4.5903047e-02   4.3261688e-02   4.0820433e-02   3.5772283e-02   3.2237745e-02   3.0896727e-02   2.6837543e-02   2.2221097e-02   1.8218257e-02   1.2146271e-02   5.2492803e-03   1.1901872e-04  -4.4074317e-03  -7.9868414e-03  -1.1163549e-02  -1.4070258e-02  -1.6612511e-02  -1.8077122e-02  -1.9049647e-02  -2.0272289e-02  -2.0276673e-02  -1.8641102e-02  -1.8979753e-02  -1.8801440e-02  -1.5706801e-02  -1.4510247e-02  -1.4389725e-02  -1.2684726e-02  -1.1748447e-02  -1.1758717e-02  -9.9207450e-03  -9.2087436e-03  -1.0032567e-02  -8.9279719e-03  -7.9460396e-03  -6.4706651e-03  -2.1624099e-03   2.8540282e-03   6.3710669e-03   1.1067084e-02   1.7838039e-02   2.2411256e-02   2.7142204e-02   3.3572545e-02   3.9093860e-02   4.1300626e-02   4.3916519e-02   4.6478726e-02   4.6293756e-02   4.6205658e-02   4.5734103e-02   4.3829556e-02   4.0625101e-02   3.6499994e-02   3.0672006e-02   2.4388300e-02   1.7966708e-02   1.2402992e-02   1.0415565e-02   9.5505915e-03   8.7562778e-03   9.9567208e-03   1.1345909e-02   1.0135119e-02   8.2001607e-03   7.0183916e-03   4.9541834e-03   3.2440385e-03   3.7710943e-03   4.2890537e-03   4.3611800e-03   4.9290786e-03   7.8464608e-03   1.1006448e-02   1.4450129e-02   1.7677033e-02   2.0534022e-02   2.0185523e-02   1.7751560e-02   1.7541159e-02   1.7328961e-02   1.5169031e-02   1.3393922e-02   1.2502736e-02   1.1339067e-02   1.1131525e-02   1.0050847e-02   9.5926234e-03   6.6389866e-03   2.1137189e-03  -7.5161327e-04  -8.5217754e-04   1.2082049e-05   1.3354232e-03   1.2571166e-03  -3.6632584e-04  -3.9781677e-04  -4.0311688e-03  -6.6151111e-03  -7.8927886e-03  -9.2039794e-03  -1.2508040e-02  -1.4170646e-02  -1.4062906e-02  -1.2953927e-02  -1.3614631e-02  -1.1238339e-02  -8.1874079e-03  -1.0479532e-02  -9.0888472e-03  -8.7403383e-03  -8.7756493e-03  -8.9044223e-03  -5.7303421e-03  -4.7802497e-03   1.7884198e-03   3.5086369e-03   6.0070209e-03   7.3157222e-03   8.7027281e-03   1.0351831e-02   1.5734553e-02   1.9200207e-02   2.2818577e-02   2.5990856e-02   2.9448421e-02   2.8843725e-02   3.0469509e-02   3.6512411e-02   4.0678042e-02   3.8486673e-02   3.8450815e-02   3.7215891e-02   3.3393151e-02   2.8586425e-02   2.5721774e-02   2.4990563e-02   2.3831037e-02   2.1683909e-02   2.0004493e-02   1.7430706e-02   1.2977381e-02   8.3471136e-03   2.3915339e-03  -2.1609184e-03  -4.2816806e-03  -6.7825128e-03  -1.0038961e-02  -1.1474720e-02  -1.3108562e-02  -1.5345685e-02  -1.5712081e-02  -1.3861285e-02  -4.9788382e-03  -1.7570703e-03   1.3549601e-03   6.7554669e-03   1.0610991e-02   4.6830107e-03   3.0454545e-03   4.2678094e-03   3.6885510e-03  -3.1628774e-04   2.6481878e-04  -1.6405474e-03  -3.8695902e-03  -5.6924573e-03  -5.1746749e-03  -4.5224383e-03   9.6358335e-04   4.1204818e-03   4.9815687e-03   5.3598204e-03   4.0687396e-03   2.4395939e-03  -1.3358020e-03  -1.9255102e-03  -1.0656180e-03   1.2184465e-03   4.8251891e-04   6.2555347e-03   6.0397948e-03   8.2395706e-03   9.2683021e-03   1.5390398e-02   1.6829581e-02   1.8846685e-02   1.8370957e-02   1.9417203e-02   1.9035073e-02   1.6719889e-02   1.7206040e-02   1.9299819e-02   1.8471005e-02   1.5183194e-02   1.4098852e-02   1.2120713e-02   9.5114880e-03   8.8503315e-03   1.0937477e-02   1.1934811e-02   1.2680267e-02   1.2338787e-02   1.3764858e-02   1.2058885e-02   1.0201861e-02   8.9505071e-03   8.3843144e-03   6.0994483e-03   4.6326879e-03   4.4722090e-03   4.1093172e-03   7.0729980e-03   9.1764529e-03   1.1086000e-02   1.6152672e-02   2.0715195e-02   1.8466150e-02   2.1257440e-02   2.6364429e-02   2.1481531e-02   1.8079474e-02   1.7103818e-02   1.2901244e-02   8.1061199e-03   9.6021988e-03   9.9089562e-03   9.1022765e-03   6.8914998e-03   5.4970170e-03   4.7321812e-03   5.3434815e-03   8.0284552e-03   1.0546169e-02   9.4226018e-03   8.6254712e-03   8.1116991e-03   7.5424885e-03   1.0644244e-02   1.6222747e-02   1.9638328e-02   2.3833651e-02   2.6368450e-02   2.2404302e-02   1.8829015e-02   1.7755823e-02   1.6205745e-02   1.2776110e-02   1.1655686e-02   1.2480842e-02   9.5174905e-03   3.2348296e-03  -1.2820495e-03  -5.0832078e-04  -4.4570359e-03  -5.0853653e-03  -7.4497515e-03  -5.7508770e-03  -7.1707565e-03  -6.7402045e-03  -1.0361084e-02  -1.1113557e-02  -1.1955945e-02  -1.3727988e-02  -1.6729102e-02  -1.6121440e-02  -1.5003541e-02  -1.6075266e-02  -1.7532283e-02  -1.7892483e-02  -1.5098017e-02  -1.0672138e-02  -6.8444016e-03  -2.6494136e-03   2.8477300e-03   2.0595799e-03   6.2093044e-04   1.9097188e-04   5.8259940e-04  -1.5601499e-03  -1.8951756e-03  -1.1708863e-03   3.1649948e-03   2.1296235e-03   5.1100465e-03   6.3128778e-03   6.2475056e-03   2.4744346e-03   4.8552386e-03   1.7019918e-03   2.8523675e-03   5.4630580e-03   5.7587891e-03   3.7826819e-03   4.8620668e-03   4.6386440e-03   2.4006436e-03   2.6895201e-03   1.3360698e-03   9.6479710e-04   1.4288600e-03   2.0577880e-03   3.8265375e-03   7.1548356e-03   8.4165437e-03   7.5792229e-03   1.2442004e-02   1.4495493e-02   1.1822078e-02   1.0015285e-02   7.9736978e-03   2.9614689e-03   3.4730345e-03   6.6367154e-03   1.0544247e-02   1.3677918e-02   1.4618690e-02   1.3312543e-02   1.3080945e-02   1.4053280e-02   1.8626567e-02   2.1837372e-02   2.2466317e-02   2.3821434e-02   2.2219679e-02   1.9043342e-02   1.6108342e-02   1.3477893e-02   1.2011919e-02   1.1465709e-02   1.4385209e-02   1.9074817e-02   2.1825951e-02   2.2206647e-02   2.3873135e-02   2.4288340e-02   2.0363952e-02   1.7711197e-02   1.7981222e-02   1.3145186e-02   7.1967943e-03   6.5153461e-03   1.0280689e-02   1.4370370e-02   2.0881047e-02   2.6383553e-02   2.9867212e-02   3.1608081e-02   3.3121146e-02   3.6809861e-02   3.8644710e-02   3.8012307e-02   3.5525035e-02   3.0360142e-02   2.4961460e-02   2.1829763e-02   2.3664922e-02   2.5637388e-02   2.5961147e-02   2.3915212e-02   2.1312332e-02   1.5610337e-02   1.6217337e-02   1.3334273e-02   1.1805836e-02   9.3346249e-03   6.8411649e-03  -8.9718914e-04  -4.5813185e-04   1.5140076e-03   2.6417941e-03   4.1696760e-03   4.8254792e-03   5.7383024e-03   4.5957620e-03   3.7426728e-03   3.6296833e-03   3.8716481e-03   2.7439374e-03   3.4993070e-03   1.5961910e-03   1.9337505e-03   1.1583349e-03   1.8055626e-03   1.5659262e-03   5.3942869e-03   4.0545490e-03   1.9693177e-03  -9.8951218e-04  -4.6992916e-03  -7.2889782e-03  -6.5914863e-03  -4.8839662e-03  -5.5766788e-03  -5.4842808e-03  -4.1991226e-03  -4.3025266e-03  -5.0394628e-03  -2.2612908e-03  -1.6562152e-03  -4.6285772e-03  -5.5514824e-03  -2.9349064e-03  -4.7131477e-03  -3.3840025e-03  -1.8822819e-03  -7.8416013e-04  -2.6088099e-03  -1.1699216e-03  -2.6282305e-03  -1.4579409e-03  -6.3808862e-04  -5.8781045e-04  -3.5776401e-03  -5.4025047e-03  -6.4026475e-03  -7.5109763e-03  -8.1659240e-03  -7.2715052e-03  -6.5401338e-03  -7.9936804e-03  -8.7155602e-03  -7.0998694e-03  -4.4553157e-03  -5.4903116e-04   3.4501267e-03   5.4538305e-03   4.5156269e-03   3.9689057e-03   1.8522723e-03  -9.0660217e-04  -2.2741534e-03  -1.0246922e-03  -8.5108681e-04  -4.7407879e-04   9.6623163e-04   1.1689574e-03   1.0136828e-03   2.0471797e-03   3.2850003e-03   4.9490387e-03   6.1276670e-03   5.8710040e-03   4.8221193e-03   4.9474980e-03   4.0611803e-03   4.2162124e-03   6.1948539e-03   7.7105243e-03   7.5652314e-03   8.4890060e-03   1.0103620e-02   1.0161527e-02   1.0310589e-02   1.0667748e-02   9.6149630e-03   9.2396910e-03   8.5892239e-03   8.0427835e-03   8.3706612e-03   8.8606521e-03   8.1832250e-03   6.9903473e-03   5.2208396e-03   3.3886587e-03   2.6038455e-03   1.0630609e-03   4.5155469e-04   1.2358883e-04  -8.3074802e-04  -2.2455636e-03  -2.4306702e-03  -2.5665455e-03  -2.9713645e-03  -3.1059951e-03  -3.2930586e-03  -4.5723357e-03  -5.2776910e-03  -5.8779467e-03  -6.1082216e-03  -6.7789046e-03  -7.9314099e-03  -9.5290383e-03  -1.0468844e-02  -1.1831629e-02  -1.2957245e-02  -1.3179780e-02  -1.3743533e-02  -1.5449495e-02  -1.6491835e-02  -1.6898293e-02  -1.7254163e-02  -1.8302358e-02  -1.8505714e-02  -1.8669633e-02  -1.9264043e-02  -1.8909505e-02  -1.8808079e-02  -1.8503370e-02  -1.8207007e-02  -1.7215649e-02  -1.6751125e-02  -1.4471565e-02  -1.1869172e-02  -8.3962244e-03  -4.7098930e-03  -2.7478720e-04   4.8126024e-03   9.8985930e-03   1.5398735e-02   2.1162378e-02   2.6958519e-02   3.2224829e-02   3.7422028e-02   4.1960550e-02   4.6113682e-02   4.9357985e-02   5.2684214e-02   5.4562805e-02   5.4736281e-02   5.4242453e-02   5.4864438e-02   5.5308772e-02   5.8235807e-02   6.1069859e-02   6.4805629e-02   6.7721783e-02   7.0955768e-02   7.3270986e-02   7.6847099e-02   7.9714831e-02   8.2526960e-02   8.3953023e-02   8.4404071e-02   8.4385747e-02   8.4011873e-02   8.2360612e-02   7.9791507e-02   7.7072951e-02   7.3650411e-02   7.0695038e-02   6.7579585e-02   6.4584049e-02   6.1645719e-02   5.8591437e-02   5.4782298e-02   5.1219803e-02   4.9783310e-02   4.8146736e-02   4.7930039e-02   4.8980921e-02   4.9979705e-02   5.0178442e-02   5.0401539e-02   5.0146739e-02   4.9215757e-02   4.9117140e-02   4.8153552e-02   4.6933839e-02   4.5508104e-02   4.3214838e-02   3.9209298e-02   3.6035395e-02   3.2757245e-02   2.8711902e-02   2.4437091e-02   2.1500538e-02   1.8087470e-02   1.4942072e-02   1.1546885e-02   8.6429396e-03   5.4090185e-03   2.6798708e-03  -5.9075613e-04  -3.0838467e-03  -4.9644334e-03  -6.7497142e-03  -7.9320218e-03  -8.5899113e-03  -1.0124676e-02  -1.2477043e-02  -1.4253456e-02  -1.6298645e-02  -1.8310304e-02  -1.8857633e-02  -1.9321237e-02  -1.9302375e-02  -1.9763105e-02  -2.0290904e-02  -2.0521451e-02  -2.0285276e-02  -2.0078174e-02  -2.0084876e-02  -1.9245842e-02  -1.8600209e-02  -1.7813912e-02  -1.7376187e-02  -1.6656057e-02  -1.5977070e-02  -1.5789800e-02  -1.5137869e-02  -1.4819936e-02  -1.4023247e-02  -1.2986948e-02  -1.2148950e-02  -1.1280154e-02  -1.0134172e-02  -9.2579848e-03  -8.5040938e-03  -6.9765541e-03  -5.9936797e-03  -5.0564999e-03  -4.1661156e-03  -3.9018375e-03  -3.3453410e-03  -2.5108344e-03  -1.8298806e-03  -1.3905044e-03  -7.2412866e-04  -4.3967420e-04  -2.0530058e-04  -1.2434201e-04   3.4261423e-04   1.1578536e-03   1.6520923e-03   2.1022210e-03   2.3130584e-03   3.0838952e-03   3.6098811e-03   3.7694003e-03   4.1348784e-03   4.6447232e-03   5.1142993e-03   5.9035034e-03   7.2827776e-03   7.9154335e-03   9.0831112e-03   9.4238934e-03   1.0006918e-02   1.0438330e-02   1.1097021e-02   1.1496128e-02   1.2367693e-02   1.2080411e-02   1.2027857e-02   1.2241813e-02   1.2510489e-02   1.2953875e-02   1.4171182e-02   1.5699664e-02   1.6795488e-02   1.8064390e-02   1.8194178e-02   1.7330473e-02   1.6286400e-02   1.5149909e-02   1.3957884e-02   1.3441534e-02   1.3934364e-02   1.4205164e-02   1.4326570e-02   1.4273447e-02   1.4413606e-02   1.3892677e-02   1.3377779e-02   1.3159992e-02   1.3001760e-02   1.2102775e-02   1.1421037e-02   1.0508436e-02   9.2599491e-03   7.7666499e-03   6.5082773e-03   5.4232064e-03   4.5027662e-03   3.7634853e-03   3.0176890e-03   2.5966257e-03   1.8740811e-03   1.7427475e-03   1.1306276e-03   1.1757343e-03   1.0642997e-03   1.8343289e-03   1.6007061e-03   1.7481329e-03   9.7850740e-04   1.0473163e-03   4.8262174e-04   2.7638417e-04  -3.6336778e-04   2.8720052e-04  -1.4786695e-04   3.3239001e-04   1.2971323e-03   3.2450953e-03   4.4753867e-03   6.3412311e-03   6.9531798e-03   7.9471620e-03   8.6524331e-03   9.1879966e-03   9.3413661e-03   1.0101359e-02   9.8152254e-03   9.5813545e-03   9.2762861e-03   9.2068042e-03   8.9654246e-03   8.5309812e-03   8.3339692e-03   8.5392432e-03   8.1819308e-03   7.7900653e-03   7.5266362e-03   7.6880478e-03   6.6596778e-03   6.1027200e-03   5.0192904e-03   3.8415959e-03   2.3283517e-03   1.5364813e-03   4.1491092e-04   3.5092121e-04   3.4211247e-04  -8.7841825e-04  -1.7389479e-03  -1.8993220e-03  -2.7884418e-03  -3.3560898e-03  -3.1102160e-03  -2.7772741e-03  -2.8304684e-03  -3.0073154e-03  -2.6875419e-03  -2.7185276e-03  -2.7105840e-03  -2.8041992e-03  -2.3134214e-03  -2.8852536e-03  -3.0723677e-03  -3.5723541e-03  -3.9799881e-03  -4.7240722e-03  -4.3974665e-03  -3.8474404e-03  -2.7584576e-03  -1.1252322e-03   5.5902742e-04   2.0464311e-03   4.7294246e-03   6.6972772e-03   7.0246380e-03   6.9774988e-03   6.8599139e-03   5.2915709e-03   4.4522675e-03   4.8238015e-03   5.4526494e-03   6.7418356e-03   7.9176958e-03   7.9786675e-03   7.5556665e-03   7.1202799e-03   4.9131813e-03   2.8111860e-03   1.3491333e-03  -8.7982709e-05  -1.1016572e-03  -1.7617836e-03  -2.9161178e-03  -3.9963244e-03  -4.4540338e-03  -4.6899444e-03  -4.2639922e-03  -3.6976927e-03  -2.5375684e-03  -1.5032427e-03  -4.5847029e-04   4.0313724e-04   1.7887175e-03   3.1660092e-03   4.0190833e-03   4.7901207e-03   6.1459732e-03   7.2186837e-03   8.2259607e-03   1.0236431e-02   1.2719473e-02   1.4612288e-02   1.6998527e-02   1.9987997e-02   2.1217203e-02   2.2509376e-02   2.2851557e-02   2.2577315e-02   2.0791849e-02   1.9305932e-02   1.6652259e-02   1.4380415e-02   1.2328724e-02   1.0475536e-02   8.6051426e-03   7.6594810e-03   7.4479318e-03   7.6884121e-03   7.8549460e-03   8.7000286e-03   9.6095516e-03   1.0247671e-02   1.0562794e-02   1.1130903e-02   1.1401883e-02   1.0681095e-02   9.2975627e-03   7.8545968e-03   6.1134195e-03   4.7839837e-03   3.1661283e-03   2.0212778e-03   3.6964152e-04  -1.7675801e-03  -3.5000384e-03  -4.7219557e-03  -5.8613656e-03  -6.8344998e-03  -7.1764270e-03  -8.0651805e-03  -9.1569489e-03  -1.0341929e-02  -1.0363466e-02  -1.1131128e-02  -1.1787126e-02  -1.1775954e-02  -1.1440150e-02  -1.2036288e-02  -1.1904131e-02  -1.1478465e-02  -1.1711961e-02  -1.0703837e-02  -9.7493520e-03  -9.4258106e-03  -9.2128348e-03  -8.5816382e-03  -9.7238659e-03  -9.7217805e-03  -9.0227015e-03  -7.9924167e-03  -7.3092094e-03  -5.9182223e-03  -5.4271159e-03  -4.7901204e-03  -4.2512942e-03  -2.1673830e-03  -3.2258177e-04   1.4973433e-03   3.2910600e-03   4.3728330e-03   5.8340562e-03   6.3632805e-03   8.0722617e-03   8.8660212e-03   1.0450773e-02   1.1219509e-02   1.3797272e-02   1.6018090e-02   1.9348736e-02   2.2844737e-02   2.4906663e-02   2.6642578e-02   2.8232824e-02   3.0405247e-02   3.2109869e-02   3.4509788e-02   3.5926582e-02   3.7874418e-02   3.8148637e-02   3.8816863e-02   3.8247928e-02   3.8726271e-02   3.8547096e-02   3.8912547e-02   3.8884183e-02   3.9495946e-02   3.8768666e-02   3.7969685e-02   3.7255802e-02   3.6077092e-02   3.4907569e-02   3.4255154e-02   3.2378259e-02   3.0554419e-02   2.9340935e-02   2.8041312e-02   2.7214629e-02   2.5785119e-02   2.5655437e-02   2.5046621e-02   2.5013471e-02   2.4346760e-02   2.4969529e-02   2.3385557e-02   2.2786692e-02   2.2584638e-02   2.1217660e-02   2.0231976e-02   2.0276792e-02   1.9496051e-02   1.7676890e-02   1.6832800e-02   1.5680134e-02   1.4104463e-02   1.2697656e-02   1.1354771e-02   9.9862449e-03   9.0674012e-03   7.9567378e-03   6.2664543e-03   5.3860914e-03   5.5220877e-03   4.7496362e-03   4.3935374e-03   3.6185069e-03   2.5923202e-03   1.5217113e-03   5.7956113e-04  -2.3423087e-07  -6.7564556e-04  -1.1363402e-03  -1.8040481e-03  -1.7423748e-03  -2.3242686e-03  -1.7837519e-03  -1.4792786e-03  -1.6405090e-03  -2.2777169e-03  -2.2911708e-03  -3.2009254e-03  -3.1777704e-03  -3.6520831e-03  -3.7912356e-03  -4.0144792e-03  -4.1104313e-03  -5.1530697e-03  -5.2317551e-03  -5.2539481e-03  -5.6780402e-03  -5.9873396e-03  -6.1088443e-03  -6.1227476e-03  -6.5991539e-03  -6.8560570e-03  -6.6543787e-03  -6.8649780e-03  -7.1118085e-03  -7.0655948e-03  -7.5737887e-03  -7.8428058e-03  -7.7305958e-03  -7.4905286e-03  -7.3006818e-03  -6.7149982e-03  -5.7033179e-03  -4.7770931e-03  -4.2578561e-03  -4.2676095e-03  -4.2746877e-03  -4.8481427e-03  -5.4153193e-03  -5.3772639e-03  -4.9224922e-03  -3.4738627e-03  -2.3002296e-03  -1.7155784e-03  -1.6936815e-03  -1.2589844e-03  -2.0012832e-03  -1.7608479e-03  -1.2021675e-03  -5.4999942e-04  -2.1924784e-04   6.5171928e-04   3.5580284e-04   3.2277529e-04   9.1775895e-05   5.9370691e-04   6.4661162e-04   1.0545520e-03   1.4425314e-03   1.9071026e-03   1.6995278e-03   2.1063497e-03   2.4117069e-03   2.9904906e-03   3.1371549e-03   2.7095592e-03   2.4075561e-03   2.8249416e-03   2.7409180e-03   3.0802485e-03   3.4749673e-03   3.5995914e-03   3.7210007e-03   3.4904205e-03   3.5540875e-03   3.6798596e-03   3.4251820e-03   2.6806389e-03   2.7183988e-03   2.6369363e-03   2.9262946e-03   3.2433872e-03   3.3271057e-03   3.3511366e-03   3.2196351e-03   2.7943430e-03   2.9759416e-03   3.0197182e-03   2.8843024e-03   2.7203368e-03   3.0226362e-03   3.0824361e-03   3.5595926e-03   3.5800171e-03   3.8433892e-03   3.5876921e-03   3.5079350e-03   3.3080265e-03   3.4088285e-03   3.1828104e-03   3.5084756e-03   3.2435572e-03   2.7751234e-03   2.2376124e-03   2.3487276e-03   1.9399546e-03   1.6176093e-03   1.6243900e-03   1.9175679e-03   1.4385072e-03   1.6088488e-03   1.8072149e-03   1.8216031e-03   1.5490760e-03   1.7136060e-03   1.5581672e-03   1.5297519e-03   1.6409723e-03   1.5295095e-03   1.3504163e-03   1.1475759e-03   9.0856629e-04   6.1860623e-04   7.0869851e-04   8.9981415e-04   5.6325251e-04   6.0472103e-04   7.1802067e-04   6.0286897e-04   3.5216790e-04   8.3791655e-04   7.6570989e-04   1.4216273e-03   1.9304098e-03   1.9425977e-03   1.9808521e-03   1.6450725e-03   5.6385336e-04   1.1449246e-04   3.1575147e-04   8.8424049e-05   1.0523365e-03   1.6191741e-03   1.9891276e-03   1.9863841e-03   2.7187284e-03   2.5977035e-03   2.3485432e-03   2.5282761e-03   2.8425214e-03   2.5633411e-03   2.3708309e-03   2.5296918e-03   2.5652183e-03   2.0246221e-03   1.6639994e-03   1.4505034e-03   1.3208054e-03   1.1118632e-03   1.5704371e-03   2.2329342e-03   2.8858362e-03   3.1174134e-03   3.0035686e-03   2.8185824e-03   2.3037142e-03   1.7107568e-03   2.0287429e-03   2.2788107e-03   2.1474083e-03   2.0678179e-03   2.3337815e-03   1.9931395e-03   1.6906389e-03   1.8545948e-03   1.9620499e-03   1.6808134e-03   1.5405616e-03   1.6933639e-03   1.2762082e-03   9.8634736e-04   2.7046698e-04   2.1846976e-04   7.7891745e-05  -5.5105046e-05   1.7893414e-04   7.5076209e-04   1.3993297e-04  -2.6046190e-04  -5.2298978e-04  -1.5041784e-03  -1.9414240e-03  -3.3801931e-03
[truncated: 6,415,085 more chars]
